# Supplementary material for: Role of Non-Coding Regulatory Elements in the Control of GR-Dependent Gene Expression
Source: Int J Mol Sci. 2021 Apr 20;22(8):4258. doi: 10.3390/ijms22084258 (PMC8073421; doi:10.3390/ijms22084258)
Supplement: Supplementary file 1 [file ijms-22-04258-s001.zip]

Archive with 10 entries (10 files):
- Supplementary Role of non-coding regulatory elements in control of GR-dependent gene expression-M.Z..pdf
- Table_S1.tsv
- Table_S2.tsv
- Table_S3.txt
- Table_S4.tsv
- Table_S5.tsv
- Table_S6.txt
- Table_S7.tsv
- Table_S8.txt
- Table_S9.tsv
