# Supplementary material for: Role of Non-Coding Regulatory Elements in the Control of GR-Dependent Gene Expression
Source: Int J Mol Sci. 2021 Apr 20;22(8):4258. doi: 10.3390/ijms22084258 (PMC8073421; doi:10.3390/ijms22084258)
Supplement: Supplementary file 1 [file ijms-22-04258-s001.zip › Table_S1.tsv]

gene.name	t00_rep1	t00_rep2	t00_rep3	t00_rep4	t05_rep1	t05_rep2	t05_rep3	t05_rep4	t1_rep1	t1_rep2	t1_rep3	t1_rep4	t2_rep1	t2_rep2	t2_rep3	t2_rep4	t3_rep1	t3_rep2	t3_rep3	t3_rep4	t4_rep1	t4_rep2	t4_rep3	t4_rep4	t5_rep2	t5_rep3	t5_rep4	t6_rep2	t6_rep3	t6_rep4	t7_rep1	t7_rep2	t7_rep3	t7_rep4	t8_rep1	t8_rep2	t8_rep3	t8_rep4	t10_rep1	t10_rep2	t10_rep3	t10_rep4	t12_rep1	t12_rep2	t12_rep3	t12_rep4	mean	fdr	gene.regulation
SCNN1A	135.152173913043	165.04347826087	160.336956521739	171.934782608696	182.336956521739	189.195652173913	136.152173913043	177.260869565217	809.184782608696	173.45652173913	153.173913043478	176.717391304348	630.619565217391	354.239130434783	382.978260869565	290.086956521739	461.554347826087	498.760869565217	634.195652173913	444.217391304348	324.652173913044	598.369565217391	565.065217391304	488.04347826087	702.5	753.717391304348	595.739130434783	875.641304347826	804.152173913044	856.04347826087	867.326086956522	996.010869565218	859.95652173913	930.130434782609	1069.47826086957	1211.91304347826	1143.26086956522	954.934782608696	1288.60869565217	1782.39130434783	1498.91304347826	1026.36956521739	1736.84782608696	1635.47826086957	1528.19565217391	1247.53260869565	710.17109	3.74059430677148e-18	up-regulated
CEP70	716.913043478261	745.586956521739	697.076086956522	830.891304347826	715.119565217391	720.130434782609	671.021739130435	855	1632.05434782609	709.271739130435	696.021739130435	639.326086956522	1309.21739130435	711.858695652174	857.608695652174	805.010869565218	1183.4347826087	903.673913043478	890.434782608696	927.826086956522	882.391304347826	1152.5652173913	1095.76086956522	1128.88043478261	1391.41304347826	1372.67391304348	1229.69565217391	1777.55434782609	1562.39130434783	1699.32608695652	1946.17391304348	1893.79347826087	1958.26086956522	1542.32608695652	2088.5	1902.52173913043	2502.36956521739	1332.84782608696	2576.21739130435	2662.71739130435	2761.20652173913	2591.29347826087	3008.89130434783	2754.09782608696	2867.39130434783	2819.15217391304	1472.12806284783	7.31711152406173e-18	up-regulated
ADGRG2	486.565217391304	569.054347826087	476.021739130435	620.391304347826	497.217391304348	531.771739130435	411.228260869565	605.978260869565	1248.5	607.010869565217	556.782608695652	579.826086956522	1014.48913043478	657.771739130435	667.108695652174	631.739130434783	865.402173913044	829.652173913044	869.956521739131	885.010869565218	638.521739130435	1099.09782608696	977.510869565217	999.108695652174	1367.41304347826	1249.95652173913	1241.92391304348	1452.58695652174	1545.71739130435	1447.07608695652	1349.61956521739	1649.89130434783	1598.5	1128.88043478261	1362.13043478261	1811.52173913043	1993.73913043478	1164.5652173913	1970.1847826087	2472.5652173913	2296.52173913044	1928.77173913043	2214.36956521739	2616.45652173913	2448.5652173913	2024.70652173913	1210.03002015217	1.05745324484754e-17	up-regulated
SLC7A7	1280.30434782609	1156.91304347826	1030.98913043478	1113.75	1172.19565217391	1081.82608695652	998.934782608696	1183.4347826087	2018.9347826087	1201.01086956522	1390.5652173913	1298.65217391304	1720.69565217391	1306.97826086957	1490.67391304348	1327	1392.17391304348	1392.96739130435	1257.83695652174	1587.89130434783	1163.73913043478	1732.13043478261	2123.73913043478	2005.73913043478	1874.36956521739	2092.80434782609	2089	2141.04347826087	2268.36956521739	2079.04347826087	2208.45652173913	2372.15217391304	2237.26086956522	1966.67391304348	2592.89130434783	2428.10869565217	2400.80434782609	1999.97826086957	2727.80434782609	2429.26086956522	2463.73913043478	2701.69565217391	3054.30434782609	3004.30434782609	2699.02173913044	3122.26086956522	1877.87875897826	2.79228131761795e-17	up-regulated
PAQR7	110.29347826087	95.5869565217391	102.760869565217	99.7826086956522	113.326086956522	102.913043478261	110.04347826087	108.413043478261	143.108695652174	80.5978260869565	104.869565217391	96.6521739130435	160.782608695652	114.282608695652	77.0978260869565	126.869565217391	150.891304347826	129.467391304348	125.326086956522	163.978260869565	145.434782608696	160.195652173913	174.45652173913	184.152173913043	222.152173913043	184	249.04347826087	227.391304347826	208.163043478261	169.021739130435	217.673913043478	262.217391304348	266.217391304348	183.847826086957	267.586956521739	226.369565217391	267.5	174.434782608696	288.521739130435	246.804347826087	291.282608695652	355.978260869565	272.413043478261	311.184782608696	315.141304347826	323.576086956522	185.039225152174	1.97853181979452e-16	up-regulated
METTL7A	10.2391304347826	15.9782608695652	3.34782608695652	4.21739130434783	8.75	4.93478260869565	17.2173913043478	5.89130434782609	110.923913043478	11.7173913043478	12.3478260869565	13	89.5	38.0652173913043	43.9456521739131	34.9347826086957	54.6086956521739	41.0869565217391	51.0869565217391	78.1739130434783	33.5326086956522	102.54347826087	87.3260869565217	98.4239130434783	90.2608695652174	91.2934782608696	105.108695652174	136.652173913043	122.673913043478	161.282608695652	138.413043478261	175.586956521739	188.826086956522	98.6195652173913	200.782608695652	157.847826086957	168.521739130435	73.3369565217391	184.152173913043	171.021739130435	239.739130434783	179.021739130435	184.152173913043	263.467391304348	306.630434782609	276.217391304348	101.85656723913	4.2703345962525e-16	up-regulated
ATP2B4	1084.71739130435	959.489130434783	1436.40217391304	1462.47826086957	1333.78260869565	1068.42391304348	1131.25	1545.71739130435	1486.15217391304	980.402173913044	1256.65217391304	1284.41304347826	1435.97826086957	1235.21739130435	1336.57608695652	1363.71739130435	1385.23913043478	1468.41304347826	1644.20652173913	1615.21739130435	1225.10869565217	1459.97826086957	1641.10869565217	1733.1847826087	1708.53260869565	1691.63043478261	2200.5	1666.47826086957	1779.80434782609	1893.34782608696	2180.52173913044	2267.60869565217	2450.71739130435	1971.47826086957	2098.5652173913	2152.23913043478	2421.09782608696	1976.54347826087	2400.80434782609	2547.3152173913	2498.21739130435	3086.58695652174	2524.55434782609	2530.21739130435	3034.97826086957	2688.39130434783	1790.08593667391	4.2703345962525e-16	up-regulated
EMP2	1796.25	2254.36956521739	1873.89130434783	1941.05434782609	1846.19565217391	2270.73913043478	1763.9347826087	2092.42391304348	4981.03260869565	1853.19565217391	1819.52173913043	1954.20652173913	4162.47826086957	2722.73913043478	2989.76086956522	2485.07608695652	4208.94565217391	3438.89130434783	3882.36956521739	3179.78260869565	3269.04347826087	4743.97826086957	4411.58695652174	3839.36956521739	5607.65217391304	5649.34782608696	4722.32608695652	6040.15217391304	6543.08695652174	6266.95652173913	5828.30434782609	6967.95652173913	7010.73913043478	4314.69565217391	6597.71739130435	6466.84782608696	7323.47826086957	3711	7533.84782608696	8632.41304347826	8072.45652173913	7987	6949.29347826087	8110.69565217391	8610.39130434783	8120.17391304348	4714.07325423913	6.5964388346699e-16	up-regulated
FAM111B	1054.79347826087	1133.02173913043	1088.86956521739	1229.32608695652	1085.34782608696	1166.28260869565	1102.34782608696	1213	783.413043478261	1130.05434782609	1223.04347826087	1024.59782608696	888.217391304348	955.978260869565	1004.97826086957	992.826086956522	1054.9347826087	794.336956521739	900.619565217391	891.336956521739	1011.41304347826	829.5	917.304347826087	846.923913043478	719.195652173913	815.608695652174	751.489130434783	677.54347826087	694.489130434783	871.695652173913	469.434782608696	492.021739130435	526.141304347826	836.836956521739	475.413043478261	440.358695652174	465.282608695652	976.554347826087	316.836956521739	349.891304347826	343.173913043478	490.847826086957	221.489130434783	236.402173913044	315.989130434783	393.760869565217	787.020095913044	8.51861748199531e-16	down-regulated
GSDME	3118.47826086957	2937.32608695652	2986.60869565217	3344.28260869565	3053.10869565217	3119.67391304348	2935.54347826087	3562.21739130435	4869.03260869565	3454.4347826087	3971.08695652174	3297.28260869565	3861.15217391304	3417.54347826087	3424.32608695652	3569.16304347826	4232.95652173913	3821.29347826087	3533.09782608696	3678.95652173913	3919.11956521739	4228.54347826087	4478.77173913043	4023.9347826087	5167.52173913044	4780.04347826087	4941.17391304348	5283.47826086957	4905.02173913044	5127.89130434783	5198.71739130435	5378.04347826087	5544.80434782609	4352.30434782609	4718.65217391304	4941.17391304348	6246.78260869565	4314.69565217391	6003.19565217391	5602.97826086957	6123.86956521739	6219.23913043478	5942.4347826087	6949.29347826087	6838.9347826087	6110.63043478261	4511.49604630435	1.08280197362645e-15	up-regulated
B4GALT1	17500.1086956522	17838.9347826087	16982.5869565217	16841.8695652174	20647.4347826087	17991.0869565217	16445.7173913043	17500.1086956522	20034.9565217391	19513.0869565217	18434.3695652174	18085.8913043478	18167.6739130435	18721.2826086957	18257.8695652174	18530.8695652174	19739.5652173913	20114.4347826087	18434.3695652174	18721.2826086957	18908.1739130435	21384.1304347826	20545.6086956522	20114.4347826087	23522.6086956522	22475.0217391304	21384.1304347826	24393.8695652174	22745.7173913044	22109.4782608696	24234.6956521739	25302.0434782609	24960.2608695652	20647.4347826087	21494.6956521739	24530.1304347826	24393.8695652174	22891.1739130435	25680.7608695652	25847.3260869565	24669.1086956522	26687.3043478261	25680.7608695652	27101.6086956522	25492.9130434783	24809.4565217391	21315.4394235217	1.11585598265651e-15	up-regulated
CBLB	632.336956521739	793.478260869565	706.423913043478	662.054347826087	773.836956521739	781.130434782609	574.195652173913	684.934782608696	772.891304347826	687.728260869565	656.369565217391	720.891304347826	723.304347826087	822.456521739131	877.934782608696	895.260869565218	739.565217391304	878.380434782609	976.554347826087	901.847826086957	795.434782608696	928.978260869565	803.336956521739	869.695652173913	1033.01086956522	849.239130434783	1037.29347826087	1007.8152173913	997.565217391304	1059.08695652174	1014.48913043478	1126.53260869565	1068.21739130435	1163.86956521739	1131.39130434783	968.021739130435	953.108695652174	1180.39130434783	1157.0652173913	1515.80434782609	1280.04347826087	1195.36956521739	1291.84782608696	1328.69565217391	1607.25	1282.4347826087	954.512259673913	1.18460067083528e-15	up-regulated
CDC6	3630.69565217391	3700.5652173913	3294.88043478261	3011.45652173913	3355.65217391304	3628	3397.38043478261	2942.28260869565	3036.23913043478	3874.71739130435	3523.41304347826	3334.98913043478	3352.17391304348	4148.17391304348	3952.82608695652	3185.86956521739	3363.34782608696	3593.92391304348	3315.53260869565	2746.58695652174	3714.73913043478	3133.76086956522	3074.40217391304	2448.14130434783	2500.5652173913	2914.23913043478	2084.58695652174	2226.5	2483.54347826087	2269.94565217391	1925	1748.82608695652	1695.44565217391	2290.58695652174	1988.10869565217	2029.38043478261	1708.84782608696	2421.69565217391	1368.80434782609	1267.38043478261	1405.30434782609	1274.47826086957	1215.89130434783	1114.59782608696	967.510869565217	1130.97826086957	2625.91231065217	1.18460067083528e-15	down-regulated
C11orf80	457.065217391304	526.913043478261	505.739130434783	497.5	475.097826086957	527.5	454.434782608696	479.95652173913	584.695652173913	505.434782608696	465.608695652174	446.336956521739	597.217391304348	500.152173913044	470	519.119565217391	575.673913043478	475.5	491.065217391304	558.141304347826	555.271739130435	608.54347826087	599.630434782609	579.847826086957	668.95652173913	641.076086956522	644.521739130435	612.032608695652	762.152173913044	681.054347826087	654.228260869565	721.815217391304	676.608695652174	649.478260869565	604.782608695652	693.29347826087	817.565217391304	631.739130434783	807.173913043478	820.489130434783	691.010869565217	827.097826086957	778.25	894.717391304348	920.010869565217	864.760869565218	619.983933086957	1.18460067083528e-15	up-regulated
RFWD3	4002.22826086956	4003.21739130435	4131.30434782609	4544.63043478261	4207.52173913044	4064.10869565217	4011.13043478261	4411.58695652174	3574.73913043478	4352.30434782609	4176.32608695652	4115.34782608696	3431.63043478261	4241.08695652174	4528.17391304348	3971.08695652174	4193	3756.82608695652	4371.28260869565	3777.63043478261	4171.4347826087	3551.41304347826	3698.41304347826	3602.13043478261	3425.34782608696	3626.13043478261	3377.01086956522	3103.5652173913	3222.30434782609	3483.82608695652	2822.9347826087	2890.10869565217	3006.25	3438.89130434783	2696.26086956522	2633.5652173913	2716.47826086957	3736.55434782609	2526.28260869565	2669.67391304348	2521.9347826087	2779.15217391304	2247.1847826087	2280.17391304348	2233.58695652174	2563	3497.58198115217	3.68104088235791e-15	down-regulated
ADGRG6	6937.76086956522	7231.47826086957	7561.91304347826	9071.91304347826	7452	7338.91304347826	7265.82608695652	9202.97826086957	12015.2608695652	7078.71739130435	7418.98913043478	8616.3152173913	10618	7357.36956521739	7792.13043478261	9353.97826086957	9548.5652173913	8470.13043478261	8632.41304347826	10009.8913043478	7730.15217391304	10057.7173913043	10136.4782608696	11681.2391304348	11535.3913043478	10255.5434782609	13857.4565217391	12103.6304347826	12286.8043478261	14035.8695652174	12286.8043478261	14271.5652173913	13468.3695652174	13434.5217391304	13307.8695652174	12378.4347826087	13702.6086956522	13307.8695652174	14824.4565217391	14436.2826086957	13667.2173913043	16674.5217391304	14212.5434782609	16299.8913043478	15909.0217391304	17044.0652173913	11127.8448175217	4.21560079074663e-15	up-regulated
NNMT	2135.45652173913	2479.45652173913	2276.55434782609	1936.69565217391	2466.26086956522	2634.29347826087	2267.60869565217	2043.95652173913	4731.21739130435	2591.89130434783	2636.0652173913	2861.84782608696	3775.32608695652	3227.76086956522	2802.78260869565	3572.13043478261	3852.91304347826	3943.55434782609	2901.5652173913	4292	3444.19565217391	4433.48913043478	4431.63043478261	5218.21739130435	5772.82608695652	5692.5652173913	6043.10869565217	6847.13043478261	5963.60869565217	5426.91304347826	6967.95652173913	7112.5652173913	6643.45652173913	4773.0652173913	5990.20652173913	7005.73913043478	7479.86956521739	4622.1847826087	8234.95652173913	6810.65217391304	7357.36956521739	6721.20652173913	6495.39130434783	8183.56521739131	7792.13043478261	7029.23913043478	4824.40382417391	4.21560079074663e-15	up-regulated
MASTL	2329.58695652174	2567.32608695652	2218.33695652174	2395.94565217391	2302.86956521739	2595.27173913044	2204.36956521739	2289.15217391304	2143.63043478261	2497.66304347826	2225.5652173913	2394.63043478261	2180	2607.15217391304	2527.28260869565	2431.78260869565	2427.55434782609	2250.78260869565	2466.69565217391	2181.52173913044	2367.54347826087	2274.02173913044	2178.5652173913	2093.5	1989.60869565217	2149.16304347826	1789.45652173913	1905.76086956522	2133.02173913044	2227.23913043478	1643.89130434783	1654.25	1594.0652173913	2134.67391304348	1627	1550.19565217391	1618.02173913043	2048.66304347826	1359.10869565217	1428.86956521739	1280.04347826087	1321.13043478261	1124.82608695652	1114.59782608696	1118.47826086957	1252.11956521739	2004.67251319565	5.22443000927198e-15	down-regulated
SDK2	53.5869565217391	56.3695652173913	71.9021739130435	56.6304347826087	88.5217391304348	78.1086956521739	66.0434782608696	60.5	131.04347826087	39.8913043478261	50.5869565217391	69.2173913043478	94.5	61.5652173913044	83.8586956521739	54.2826086956522	66.3152173913043	69.8695652173913	108.260869565217	74.9782608695652	18.5869565217391	104.608695652174	150.054347826087	137.021739130435	211.141304347826	249.54347826087	204.217391304348	233.086956521739	249.141304347826	248.717391304348	275.565217391304	391.989130434783	404.380434782609	185.923913043478	357.173913043478	453.5	330.847826086957	209.20652173913	446.021739130435	625.95652173913	471.782608695652	356.847826086957	424.152173913043	428.804347826087	495.826086956522	398.815217391304	206.498817152174	9.83460827270519e-15	up-regulated
EXO1	1331.08695652174	1559.79347826087	1450.65217391304	1567.78260869565	1592.5652173913	1646.69565217391	1431.69565217391	1584.19565217391	1179.16304347826	1750.34782608696	1685.48913043478	1446.4347826087	1138.47826086957	1682.10869565217	1595.57608695652	1453.77173913043	1565.02173913043	1380.95652173913	1367.0652173913	1311.80434782609	1534.59782608696	1266.58695652174	1387.1847826087	1261.34782608696	1200	1264.75	1092.23913043478	1196.63043478261	1158.36956521739	1234.08695652174	898.391304347826	794.902173913044	801.5	1149.13043478261	668.760869565217	868.336956521739	768.413043478261	1279.10869565217	641.29347826087	589.413043478261	606.217391304348	863.195652173913	457.782608695652	483.804347826087	501.434782608696	621.163043478261	1180.63753863043	9.83460827270519e-15	down-regulated
MCM6	5697.52173913044	5862.41304347826	5649.34782608696	5766.97826086957	5942.4347826087	6056.08695652174	5796.89130434783	5846.80434782609	5161.76086956522	6137.41304347826	6481.23913043478	5812.08695652174	5186.67391304348	6952.97826086957	6597.71739130435	5742.95652173913	6126.63043478261	6363.44565217391	6147.07608695652	5397.91304347826	6207.95652173913	5418.19565217391	5846.80434782609	5295.9347826087	5470.58695652174	5592.17391304348	5681.5652173913	4982.84782608696	4837.5652173913	4714.02173913044	4179.17391304348	3876.09782608696	4094.5652173913	4405.71739130435	3571.17391304348	3971.08695652174	3474.55434782609	4821.69565217391	3104.63043478261	2914.85869565217	3153.65217391304	3565.76086956522	2653.44565217391	2509.09782608696	2616.45652173913	2711.80434782609	4965.16945178261	1.10530843554177e-14	down-regulated
ADGRL1	220.413043478261	184.097826086957	185.923913043478	194.521739130435	226.978260869565	198.021739130435	191.902173913044	189.478260869565	619.021739130435	192.739130434783	243.195652173913	234.608695652174	556.847826086957	274.79347826087	335.5	261.032608695652	370.065217391304	375.489130434783	489.54347826087	424.228260869565	272	483.260869565217	514.565217391304	504.315217391304	644.032608695652	730.282608695652	603.836956521739	727.130434782609	748.804347826087	750.119565217391	881.891304347826	836.413043478261	946.760869565217	464.739130434783	879.782608695652	1234.28260869565	1010.94565217391	416.934782608696	1170.69565217391	1427.1847826087	1352.25	892.304347826087	1556.09782608696	1158.5652173913	1165.20652173913	1025.67391304348	616.662605804348	1.17894170041479e-14	up-regulated
ZWINT	2448.14130434783	2594.82608695652	2408	2439.39130434783	2346.14130434783	2529.26086956522	2315.04347826087	2430.08695652174	2193.97826086957	2740.63043478261	2836.71739130435	2529.73913043478	1996.63043478261	2413.21739130435	2428.6847826087	2429.67391304348	2387.76086956522	2472.5652173913	2181.95652173913	2426.41304347826	2345.63043478261	2242.19565217391	2488.21739130435	2202.34782608696	2205.9347826087	2196.4347826087	2337.52173913044	2253.60869565217	2060.69565217391	2176.22826086957	1891.13043478261	1919.10869565217	1796.25	1987.13043478261	1600.28260869565	1860.0652173913	1833.40217391304	2103.66304347826	1615.21739130435	1628.9347826087	1646.15217391304	1723.84782608696	1186.28260869565	1590.39130434783	1469.08695652174	1393.76086956522	2137.00825808696	1.29086713050773e-14	down-regulated
MCM10	1846.69565217391	2042.25	1925.60869565217	2065.10869565217	2093.5	2088.5	2054.59782608696	2043.95652173913	1509.07608695652	2141.42391304348	2065.10869565217	2154.54347826087	1739.78260869565	2320.89130434783	2257.72826086957	2178.04347826087	2064.34782608696	2017.65217391304	1922.28260869565	1989.21739130435	2230.47826086957	1764.69565217391	1986.46739130435	1886.34782608696	1529.60869565217	1940.67391304348	1661.89130434783	1500.39130434783	1576.97826086957	1679.98913043478	1213	1089.40217391304	1191.40217391304	1618.23913043478	989.923913043478	1119.13043478261	1055.38043478261	1702.13043478261	824.630434782609	850.391304347826	810.804347826087	994.065217391304	664.260869565218	625.891304347826	617.304347826087	750.684782608696	1617.27122928261	1.53876477550303e-14	down-regulated
ALOX5AP	36.1521739130435	25.4347826086957	23.3478260869565	33.4673913043478	29.3804347826087	25.7391304347826	39.5869565217391	41.9782608695652	167.282608695652	29.3913043478261	57.4239130434783	60.8478260869565	202.467391304348	91.6521739130435	91.9565217391304	54.2826086956522	195.217391304348	106.782608695652	116.413043478261	93.304347826087	110.04347826087	117.097826086957	110.586956521739	121.869565217391	171.29347826087	146.217391304348	127.04347826087	179.021739130435	232.5	218.04347826087	220.326086956522	197.869565217391	214.130434782609	144.260869565217	241.04347826087	215.5	275.630434782609	117.184782608696	292	318.815217391304	309	278.847826086957	330.95652173913	252.869565217391	261.119565217391	300.836956521739	152.743856826087	2.04653215184213e-14	up-regulated
WDR76	1328.83695652174	1360.20652173913	1209.64130434783	1337.46739130435	1257.15217391304	1312.52173913043	1261.54347826087	1281.95652173913	1037.66304347826	1442.53260869565	1373.1847826087	1410.15217391304	1198.3152173913	1346.52173913044	1206.38043478261	1360.82608695652	1395.4347826087	1300.03260869565	1297.15217391304	1242.39130434783	1408.14130434783	1231.0652173913	1331.08695652174	1199.89130434783	1169.0652173913	1209.23913043478	1176.45652173913	1016.02173913043	1037.47826086957	1110.20652173913	760.260869565217	784.565217391304	770.29347826087	1084.71739130435	771.434782608696	749.184782608696	769.391304347826	1065.84782608696	613.173913043478	541.45652173913	573.565217391304	783.304347826087	409.891304347826	446.565217391304	514.478260869565	676.652173913044	1068.76840736957	2.07955272375505e-14	down-regulated
CDCA5	1469.67391304348	1495.52173913043	1334.41304347826	1364.17391304348	1286	1350.52173913043	1368.0652173913	1431.69565217391	1137.15217391304	1399.54347826087	1417.5652173913	1481.57608695652	1359.95652173913	1442.11956521739	1598.83695652174	1445.15217391304	1422.60869565217	1435.57608695652	1540.63043478261	1419.71739130435	1554.67391304348	1291.36956521739	1300.78260869565	1359.29347826087	1225.10869565217	1296.14130434783	1334.41304347826	1176.27173913044	1167.13043478261	1112.27173913044	999.413043478261	1089.40217391304	1057.25	1117.92391304348	979.913043478261	971.45652173913	935.532608695652	1153.77173913043	810	810.913043478261	912.858695652174	921.304347826087	683.260869565217	659.173913043478	721.304347826087	716.195652173913	1207.77456536957	2.25359590706538e-14	down-regulated
MAOA	68.3913043478261	87.1304347826087	91.5652173913043	63.5	61.9565217391304	67.8478260869565	79.7391304347826	56.4347826086957	243.271739130435	58.9565217391304	87.2173913043478	79.5869565217391	220.108695652174	81.5217391304348	94.8152173913043	113.326086956522	135.739130434783	112.608695652174	133.95652173913	110.608695652174	102.804347826087	157.282608695652	189.913043478261	196.652173913043	246.760869565217	266.608695652174	267.021739130435	335.673913043478	326.315217391304	297.782608695652	327.510869565217	458.771739130435	495.04347826087	230.20652173913	357.891304347826	383.847826086957	547.717391304348	227.010869565217	500.076086956522	566.434782608696	712.869565217391	522.478260869565	531.771739130435	848.032608695652	1052.52173913043	645.782608695652	279.197076804348	2.59899510308703e-14	up-regulated
IFIT1	98.2391304347826	77.804347826087	62.6304347826087	84.0108695652174	68.0217391304348	79.304347826087	82.8913043478261	83.0869565217391	89.5	87.1521739130435	84.0108695652174	84.0652173913044	114.282608695652	108.576086956522	78.2391304347826	96.3913043478261	72.7826086956522	56.0652173913044	80.4347826086957	96.75	90.8695652173913	104.608695652174	115.510869565217	116.369565217391	102.195652173913	109.391304347826	100.586956521739	97.3478260869565	111.163043478261	97.0760869565217	131.369565217391	177.815217391304	153.173913043478	145.086956521739	191.565217391304	189.695652173913	182.858695652174	137.380434782609	163.608695652174	210.391304347826	198.380434782609	151.586956521739	242.032608695652	247.065217391304	229.445652173913	197.782608695652	123.447779086957	2.62935347248141e-14	up-regulated
SSBP2	119.434782608696	112.967391304348	140.815217391304	200.489130434783	114.565217391304	161.315217391304	131.260869565217	157.934782608696	250.978260869565	91.5652173913043	119.380434782609	125.782608695652	235.347826086957	119.021739130435	133.45652173913	141.391304347826	195.217391304348	150.347826086957	158	195.195652173913	150.717391304348	170.739130434783	171.402173913044	227.565217391304	219.032608695652	237.5	247.967391304348	229.173913043478	240.304347826087	347.391304347826	279.521739130435	315.652173913044	403.521739130435	324.108695652174	292.923913043478	269.510869565217	348.130434782609	274.54347826087	368.423913043478	379.489130434783	408.413043478261	435.673913043478	417.847826086957	320.173913043478	429.065217391304	415.021739130435	238.658315565217	2.62935347248141e-14	up-regulated
CDT1	376.065217391304	350.619565217391	325.782608695652	279.782608695652	390.717391304348	363.010869565217	346.45652173913	269.586956521739	310.217391304348	340.771739130435	308.608695652174	259.54347826087	283.79347826087	360.326086956522	350	277.586956521739	371.521739130435	339.369565217391	346.119565217391	276.70652173913	390.04347826087	265.95652173913	341.847826086957	252.521739130435	285.173913043478	282.021739130435	234.978260869565	263.836956521739	234.891304347826	219.021739130435	215.815217391304	187.391304347826	202.217391304348	185.923913043478	167.021739130435	200.065217391304	164.79347826087	204.934782608696	145.565217391304	126.184782608696	130.173913043478	122.891304347826	118.413043478261	104.152173913043	107.804347826087	93.9239130434783	255.959828108696	3.58176286639479e-14	down-regulated
MSH2	4435.34782608696	4955.07608695652	4483.39130434783	5572.9347826087	4696.45652173913	4803.10869565217	4768.80434782609	5426.91304347826	4060.15217391304	5198.71739130435	5132.21739130435	5042.4347826087	3899.13043478261	5071.58695652174	5050.73913043478	4854.94565217391	4751.71739130435	4676.47826086957	4689.19565217391	4482.02173913043	4803.10869565217	4067.30434782609	4555.89130434783	4193	3801.45652173913	3942.47826086957	3775.32608695652	3690.09782608696	3694.76086956522	3924.27173913044	3033.65217391304	2843.54347826087	3069.78260869565	4032.34782608696	2879.97826086957	2992.67391304348	2894.80434782609	4493.6847826087	2687.95652173913	2454.52173913044	2568.94565217391	3119.07608695652	2331.34782608696	2544.39130434783	2471.4347826087	2777.60869565217	3993.36560304348	3.59604806626797e-14	down-regulated
PDZD2	7.67391304347826	3.04347826086957	6	8.97826086956522	5.89130434782609	3	5.19565217391304	11.4130434782609	91.3478260869565	8.97826086956522	4.65217391304348	16.9891304347826	54.7391304347826	19.1521739130435	13.9565217391304	12.5978260869565	53.4891304347826	35.0869565217391	45.8695652173913	28.8369565217391	46.4456521739131	71.3695652173913	40.6413043478261	65.1956521739131	72.0326086956522	87.8586956521739	65.0217391304348	71.4347826086957	66.6086956521739	89.8260869565217	115.869565217391	100.45652173913	137.663043478261	88.4130434782609	99.9782608695652	118.173913043478	103.5	61.6739130434783	142.608695652174	111.836956521739	123.086956521739	154.076086956522	117.391304347826	104.152173913043	119.195652173913	145.739130434783	64.2856832173913	3.59604806626797e-14	up-regulated
ACSL1	700.717391304348	730.282608695652	766.358695652174	855.315217391304	749.260869565217	748.956521739131	762.065217391304	845.489130434783	3767.27173913044	959.282608695652	954.826086956522	898.391304347826	2685.92391304348	1436.40217391304	1323.5652173913	1512	2999	2345.19565217391	2035.60869565217	2489.65217391304	1859.11956521739	3230.91304347826	2807.75	3341	4825.54347826087	4134.19565217391	4972.08695652174	5267.39130434783	4809.57608695652	4590.52173913044	5535.52173913044	6060.76086956522	6551.15217391304	2402.80434782609	4265.75	5440.02173913044	6590.63043478261	2117.91304347826	6707.34782608696	6350.48913043478	6458.63043478261	7329.89130434783	6309.60869565217	7510.17391304348	7295.32608695652	5761.63043478261	3523.72424063044	3.88937713025463e-14	up-regulated
DTL	2382.73913043478	2488.21739130435	2425.21739130435	2733.34782608696	2428.6847826087	2655.97826086957	2239.19565217391	2643.10869565217	1391.1847826087	2453.89130434783	2526.78260869565	2669.67391304348	1542.92391304348	2324.26086956522	2393.89130434783	2662.71739130435	2133.02173913044	1889.04347826087	2203.69565217391	2451.51086956522	2185.94565217391	1877.83695652174	2009.01086956522	2197.13043478261	1600.28260869565	1727.76086956522	2040.54347826087	1498.91304347826	1684.04347826087	1774.71739130435	1020.54347826087	1023.66304347826	1074.39130434783	1719.53260869565	911.282608695652	818.108695652174	806.804347826087	1996.63043478261	693.369565217391	682.673913043478	649.902173913044	1040.30434782609	524.565217391304	633.891304347826	681.456521739131	816.782608695652	1746.28637173913	3.88937713025463e-14	down-regulated
MARVELD1	1228.53260869565	1111.73913043478	1124.16304347826	987.836956521739	1267.60869565217	1157.0652173913	1223.9347826087	1043.19565217391	1797.32608695652	1332.39130434783	1316.5	1320	1639.78260869565	1335	1289.02173913043	1464.23913043478	1675.39130434783	1580.25	1312.52173913043	1645.0652173913	1524.76086956522	1681.8152173913	1655.23913043478	1839.26086956522	2116.85869565217	1964.15217391304	2145.26086956522	2529.26086956522	2160.0652173913	2031.58695652174	2357.96739130435	2559.13043478261	2312.54347826087	1363.23913043478	1952.07608695652	2360.66304347826	2377.4347826087	1432.40217391304	2678.45652173913	2584.97826086957	2775	2629.3152173913	2716.96739130435	3456.30434782609	2994.15217391304	2540.45652173913	1860.67200284783	4.60888268008685e-14	up-regulated
MSH6	10681.8695652174	10808.1739130435	9924.73913043478	10025.3260869565	10490.847826087	11035.5217391304	10096.8913043478	9744.41304347826	10147.652173913	12026.8260869565	10468.3043478261	8844.30434782609	9663	10911.0434782609	10490.847826087	8909.36956521739	10490.847826087	10977.1739130435	10446.1304347826	8844.30434782609	11535.3913043478	10117.4565217391	9990.86956521739	8567.95652173913	9320.63043478261	9533.28260869565	7810.5652173913	9126.3152173913	8774.60869565218	8858.71739130435	7641.89130434783	7164.36956521739	6886.84782608696	8501.4347826087	7224.30434782609	7196.9347826087	6628.26086956522	8610.39130434783	5955.73913043478	5930.20652173913	5911.4347826087	5839	5383.02173913044	5486.21739130435	5405.91304347826	5809.96739130435	8787.81129202174	4.61478415364016e-14	down-regulated
MCM4	9291.5652173913	10241.9565217391	9596.4347826087	10367.0434782609	9500.5	10192.1739130435	9465.58695652174	10315.9782608696	9275.9347826087	10175.152173913	10308.8913043478	9663	9465.58695652174	11208.9782608696	11496.9130434783	9882.97826086957	10405.8913043478	10763.8913043478	10634.2173913043	9058.63043478261	10446.1304347826	9935.73913043478	10207.2173913043	8774.60869565218	9108.02173913044	9420.08695652174	8141.89130434783	8643.65217391304	8762.34782608696	8801.19565217392	7227.89130434783	7316.17391304348	7599.73913043478	8938.89130434783	6977.97826086957	7441.86956521739	6937.76086956522	8762.34782608696	5881.98913043478	6350.48913043478	5953.04347826087	6060.76086956522	5154.65217391304	4768.80434782609	4786.76086956522	4747.52173913044	8662.14924856522	5.49716985161594e-14	down-regulated
EML1	2320.4347826087	2316.42391304348	2336.9347826087	2290.58695652174	2448.14130434783	2143.63043478261	2392.14130434783	2292.42391304348	1938.26086956522	2316.02173913044	2408.42391304348	2352.10869565217	1952.07608695652	2301.42391304348	2179.02173913044	2259.02173913044	2257.21739130435	2023.10869565217	2178.5652173913	2059.34782608696	2234.58695652174	2018.9347826087	2055.40217391304	1994.11956521739	1767.65217391304	1753.28260869565	1935.95652173913	1685.26086956522	1652.58695652174	1748.82608695652	1639.05434782609	1451.39130434783	1680.9347826087	1934.03260869565	1632.55434782609	1526.45652173913	1528.40217391304	2015.40217391304	1493.9347826087	1360.20652173913	1524.21739130435	1699.32608695652	1386.04347826087	1511.30434782609	1591.32608695652	1541.84782608696	1937.57303786957	5.49716985161594e-14	down-regulated
FARP1	830.054347826087	874.217391304348	968.152173913044	887.163043478261	974.934782608696	905.576086956522	870.978260869565	935.108695652174	1896.10869565217	806.717391304348	808.347826086957	796.434782608696	1511.30434782609	985.086956521739	892.086956521739	842.413043478261	1239.17391304348	1004.97826086957	1104.3152173913	973.478260869565	924.217391304348	1315.5652173913	1276.21739130435	1257.54347826087	1706.26086956522	1586.02173913043	1709.84782608696	1896.38043478261	1934.03260869565	1898.5	2065.86956521739	2150.23913043478	2312.54347826087	1196.23913043478	2058.95652173913	2312.09782608696	2524.55434782609	1065.84782608696	2859.65217391304	3129.95652173913	2820.52173913044	2652.4347826087	3215.79347826087	2726.26086956522	2963.78260869565	2512.19565217391	1612.56877969565	5.49716985161594e-14	up-regulated
JAK1	19405.8260869565	18085.8913043478	18639.9782608696	19829.4347826087	20034.9565217391	18908.1739130435	18345.152173913	19739.5652173913	25132.9130434783	18085.8913043478	18038.4891304348	18345.152173913	25132.9130434783	23656.0434782609	21640.4782608696	20866.5434782609	24669.1086956522	23921.5434782609	23921.5434782609	20979.3043478261	22609.2608695652	25680.7608695652	23211.4565217391	22281	24669.1086956522	24960.2608695652	20321.2173913043	24809.4565217391	25302.0434782609	26687.3043478261	26851.652173913	27101.6086956522	25680.7608695652	27642.9347826087	28503.4130434783	28503.4130434783	27892.4565217391	23360.5217391304	29924.1956521739	32339.1739130435	28247.9347826087	29594.0869565217	33465.9130434783	29079.3695652174	27892.4565217391	31571.4130434783	24251.3490075652	5.77092175523975e-14	up-regulated
CHAF1A	723.673913043478	695.54347826087	641.804347826087	569.728260869565	737.684782608696	664.391304347826	648.847826086957	580.630434782609	556.282608695652	671.217391304348	672.869565217391	567.858695652174	545.934782608696	729.239130434783	673.04347826087	554.956521739131	598.478260869565	720.130434782609	683.260869565217	544.260869565217	655.369565217391	612.434782608696	655.239130434783	498.760869565217	593.978260869565	560	511.826086956522	563.5	538.423913043478	467.630434782609	482.576086956522	455.847826086957	428.934782608696	413.152173913044	401.369565217391	526.141304347826	339.847826086957	476.239130434783	307.065217391304	294.760869565217	360.565217391304	349.891304347826	291.152173913044	296.173913043478	256.282608695652	263.608695652174	530.013232152174	6.01338546272182e-14	down-regulated
FAM83A	22.9565217391304	31.2934782608696	37.8695652173913	27.8586956521739	20.4565217391304	31.9347826086957	41.2065217391304	16.8152173913044	69.4130434782609	14.4782608695652	24.2608695652174	36.9347826086957	54.7391304347826	29.7173913043478	50.3478260869565	42.9130434782609	51.2934782608696	47.6304347826087	55.9347826086957	50.5434782608696	41.195652173913	61.9565217391304	75.8586956521739	75.5652173913044	57.0217391304348	111.434782608696	70.6521739130435	70.2826086956522	89.4130434782609	98.1521739130435	80.5434782608696	112.510869565217	136.108695652174	80.304347826087	87.0978260869565	105.586956521739	142.5	75.1086956521739	132.173913043478	139.978260869565	155.369565217391	118.489130434783	118.413043478261	133.478260869565	133.434782608696	105.847826086957	73.1973081521739	6.53741657086124e-14	up-regulated
ACSS2	381.826086956522	320.717391304348	344.847826086957	375.304347826087	382.282608695652	350.586956521739	384.304347826087	407.228260869565	437.239130434783	364.391304347826	391.097826086957	381.217391304348	386.065217391304	367.423913043478	369.173913043478	377.934782608696	353.5	373.217391304348	370.478260869565	384.847826086957	370.54347826087	435.20652173913	420.065217391304	426.04347826087	435.739130434783	367.20652173913	482.576086956522	442.652173913044	431.826086956522	420.434782608696	442.652173913044	502.5	489.434782608696	458.521739130435	619.021739130435	519.891304347826	512.869565217391	442.413043478261	556.456521739131	515.673913043478	541.369565217391	587.652173913044	649.804347826087	674.086956521739	710.021739130435	715	449.420600369565	6.53741657086124e-14	up-regulated
CDC25A	453.913043478261	491.70652173913	429.347826086957	505.782608695652	542.891304347826	415.152173913044	438.260869565217	508.282608695652	492.978260869565	455.434782608696	538.728260869565	491.934782608696	443.630434782609	484.978260869565	517.478260869565	516.217391304348	476.54347826087	507.826086956522	508.086956521739	476.478260869565	506.021739130435	375.978260869565	497.934782608696	479.065217391304	389.076086956522	403.5	463.054347826087	373.434782608696	439.021739130435	409.804347826087	282.510869565217	303.45652173913	261.152173913044	330.652173913044	244.815217391304	284.021739130435	245.739130434783	422.141304347826	217.021739130435	174.717391304348	227.45652173913	272.891304347826	165.913043478261	170.782608695652	166.95652173913	219.586956521739	391.790403652174	8.03004775500875e-14	down-regulated
NEBL	2008.25	1995.73913043478	1787.21739130435	2051.41304347826	1786.64130434783	1820.96739130435	1712.64130434783	2170.52173913044	2592.89130434783	1929.97826086957	2038.33695652174	2205.9347826087	2715.52173913044	1866.4347826087	1872.65217391304	2117.59782608696	2185.19565217391	2277.15217391304	2382.73913043478	2497.66304347826	1686.01086956522	2715.02173913044	2610.07608695652	2934.92391304348	3129.05434782609	2485.56521739131	3284.19565217391	3470.89130434783	3074.40217391304	3323.80434782609	3254.65217391304	3829.21739130435	3313.78260869565	3055.01086956522	3429.44565217391	2983.9347826087	3303.5	2807.75	3317.4347826087	4030.72826086957	3631.92391304348	3576.36956521739	3383.90217391304	3841.17391304348	3885.0652173913	3856.94565217391	2744.13633739131	8.37083298194516e-14	up-regulated
ALOX15B	0	0	0	0	0	0	0	0	17.9130434782609	1.17391304347826	0	0.956521739130435	13.3913043478261	1.06521739130435	1.15217391304348	0.956521739130435	10.1739130434783	11.4782608695652	11.0869565217391	4.82608695652174	4.17391304347826	9.97826086956522	18.9239130434783	10.6739130434783	14.8913043478261	14.804347826087	16	29.7065217391304	26.1304347826087	29.7717391304348	19.8913043478261	17.4565217391304	23.3152173913044	7.08695652173913	39.804347826087	35.4130434782609	32.8913043478261	1.89130434782609	47.8369565217391	36.1739130434783	45.6086956521739	39.054347826087	50.5869565217391	36.1086956521739	41.0869565217391	47.5217391304348	16.7599245521739	8.67664848763157e-14	up-regulated
VWA8	1161.83695652174	1206.23913043478	1208.11956521739	1311.60869565217	1255.73913043478	1179.60869565217	1096.84782608696	1405.30434782609	1434.20652173913	1158.5652173913	1193.75	1349.5	1380.5	1254.57608695652	1369.45652173913	1378.91304347826	1330.69565217391	1243.82608695652	1434.0652173913	1368.3152173913	1207.5	1349.9347826087	1227.58695652174	1482.39130434783	1350.13043478261	1452.35869565217	1350.52173913043	1419.90217391304	1611.09782608696	1450.91304347826	1556.82608695652	1463.26086956522	1490.19565217391	1518.77173913043	1679.73913043478	1573.91304347826	1744.79347826087	1473.23913043478	1839.91304347826	1892.94565217391	1659.0652173913	1685.48913043478	1843.85869565217	1806.0652173913	1748.54347826087	1739.26086956522	1442.17155480435	9.12975452737409e-14	up-regulated
ADAMTSL4	50.5978260869565	45.8913043478261	64.9782608695652	75.1956521739131	72.9782608695652	51.7173913043478	70.7608695652174	74.3695652173913	144.336956521739	46.6304347826087	59.2608695652174	55.3695652173913	69.7826086956522	69.9565217391304	75.9347826086957	72.9130434782609	91.1086956521739	90.9130434782609	79.1956521739131	78.1739130434783	71.7065217391304	80.804347826087	101.076086956522	102.608695652174	129.04347826087	102.45652173913	128.336956521739	120.391304347826	178.45652173913	144.065217391304	133.913043478261	156.358695652174	156.695652173913	113	137.5	114.586956521739	209.108695652174	140.54347826087	167.923913043478	233.423913043478	205.423913043478	200.489130434783	197.673913043478	212.717391304348	281.869565217391	167.489130434783	117.994093586957	1.24244651763482e-13	up-regulated
RFC4	1302.73913043478	1298	1179.9347826087	1202.82608695652	1142.34782608696	1337.23913043478	1178.65217391304	1197.04347826087	1097.41304347826	1202.82608695652	1227.58695652174	1068.63043478261	1119.65217391304	1342.65217391304	1345.0652173913	1139.76086956522	1232.41304347826	1342.89130434783	1169.39130434783	1024.5	1300.78260869565	1134.88043478261	1207.5	1092.63043478261	1113.04347826087	1071.98913043478	1027.67391304348	1070.65217391304	1099.09782608696	1014.36956521739	930.326086956522	843.239130434783	812.576086956522	1021.21739130435	809.673913043478	950.413043478261	892.086956521739	1013.19565217391	749.184782608696	776.391304347826	809.304347826087	808.760869565217	694.54347826087	733.054347826087	706.347826086957	703.869565217391	1055.181949	1.34356168350077e-13	down-regulated
KCNH3	73.7608695652174	70.8913043478261	52.304347826087	56.0869565217391	63.0217391304348	57.2717391304348	58.3695652173913	59.8260869565218	47.7826086956522	73.2826086956522	57.4239130434783	62.6630434782609	44.7826086956522	54.7391304347826	66.3152173913043	56.2173913043478	61.2826086956522	56.0652173913044	64.7608695652174	66.6086956521739	65.7173913043478	57.4565217391304	43.0652173913044	52.5652173913044	46.4021739130435	40.6630434782609	57.9782608695652	38.7173913043478	46.1739130434783	31.7173913043478	32	44.8478260869565	35.0869565217391	32.2608695652174	32	35.4130434782609	30.8913043478261	43.0978260869565	30.4347826086957	24.0434782608696	25.8695652173913	23.445652173913	23.8478260869565	14.1521739130435	22.1086956521739	22.9347826086957	46.8771270217391	1.35849159536122e-13	down-regulated
PRDX6	6872.45652173913	7329.89130434783	6847.13043478261	8047.86956521739	6319.41304347826	7208.60869565217	7164.36956521739	7996.71739130435	8442.17391304348	5692.5652173913	6930.58695652174	7406.36956521739	8938.89130434783	7300.26086956522	8603.17391304348	8234.95652173913	9353.97826086957	7329.89130434783	8555.15217391304	8491.65217391304	8501.4347826087	8380.4347826087	9135.02173913044	9394.13043478261	8814.32608695652	9108.02173913044	9557.82608695652	9034.36956521739	10241.9565217391	10158.8260869565	9320.63043478261	9613.60869565217	8975.89130434783	9306.63043478261	10096.8913043478	8950.47826086957	10977.1739130435	8774.60869565218	10953.4347826087	11035.5217391304	11797.652173913	10618	10602.847826087	11333.7608695652	11245.9565217391	11681.2391304348	8927.75609452174	1.35849159536122e-13	up-regulated
TONSL	380.608695652174	329.565217391304	363.04347826087	296.173913043478	319.119565217391	364.065217391304	336.739130434783	286.369565217391	261.673913043478	342.489130434783	317.413043478261	297.304347826087	290.739130434783	344.717391304348	278.695652173913	314.369565217391	258.304347826087	349.478260869565	298.086956521739	321.630434782609	300.913043478261	303.70652173913	245.565217391304	253.913043478261	276.065217391304	230.282608695652	287.217391304348	258.521739130435	266.326086956522	234.978260869565	265.95652173913	240.673913043478	211.467391304348	206.902173913043	243.652173913043	230.608695652174	174.630434782609	262.565217391304	165.04347826087	201.739130434783	181	146.369565217391	203.347826086957	156.304347826087	142.478260869565	113.369565217391	264.221407195652	1.35849159536122e-13	down-regulated
PHF20L1	2511.54347826087	2442.91304347826	2392.63043478261	2498.21739130435	2277.15217391304	2419.97826086957	2425.82608695652	2454.52173913044	2633.0652173913	2355.47826086957	2353.69565217391	2383.86956521739	2453.89130434783	2360.17391304348	2297.66304347826	2313.34782608696	2592.39130434783	2403.84782608696	2478.91304347826	2467.13043478261	2308.63043478261	2595.71739130435	2418.04347826087	2438.67391304348	2681.91304347826	2682.9347826087	2779.69565217391	2638.73913043478	2811.86956521739	2784.80434782609	3008.89130434783	3066.69565217391	3114.64130434783	2545.54347826087	2804.28260869565	2884.33695652174	3199.86956521739	2759	3185.13043478261	3106.52173913044	2987.28260869565	3464.34782608696	3115.90217391304	3247.42391304348	3196.60869565217	3353.76086956522	2689.07631747826	1.56623766274632e-13	up-regulated
EMP1	598.195652173913	568.282608695652	518.869565217391	517.119565217391	579.304347826087	540.228260869565	560.358695652174	576.565217391304	3137.69565217391	922.217391304348	1095.9347826087	974.260869565217	2739.02173913044	1140.89130434783	1205.66304347826	1257.83695652174	1742.95652173913	1662.52173913043	1806.96739130435	1577.55434782609	1578.5652173913	2078.69565217391	2296.09782608696	2166.84782608696	2733.34782608696	2567.32608695652	2591.29347826087	3086.58695652174	3122.26086956522	2813.04347826087	2848.86956521739	2954.80434782609	2880.54347826087	2202.34782608696	3361.28260869565	3086.58695652174	3188.5	1441.47826086957	3461.23913043478	3169.5652173913	3677.8152173913	3357.4347826087	3827.96739130435	4239.04347826087	4300.8152173913	3797.30434782609	2185.91537171739	1.7142240188764e-13	up-regulated
STIM1	1491.08695652174	1323.19565217391	1455.0652173913	1329.54347826087	1455.52173913043	1247.84782608696	1559.52173913043	1344.46739130435	1763.09782608696	1340.73913043478	1434.0652173913	1431.44565217391	1740.71739130435	1361.08695652174	1505.30434782609	1481.14130434783	1609.34782608696	1489.6847826087	1417.5652173913	1399.54347826087	1534.59782608696	1559.79347826087	1752.07608695652	1487.60869565217	1675.13043478261	1749.41304347826	1701.25	1773.80434782609	1671.0652173913	1708.21739130435	1989.60869565217	1976.89130434783	2228.19565217391	1494.66304347826	1954.20652173913	2216.19565217391	2321.25	1630.82608695652	2452.30434782609	2462.14130434783	2644.89130434783	2199.25	2601.73913043478	2399.0652173913	2667.39130434783	2202.34782608696	1765.95458217391	1.74785608069232e-13	up-regulated
SMC2	4422.76086956522	4726.08695652174	4799.04347826087	4628.15217391304	4768.80434782609	4859.52173913044	4678.21739130435	4631.06521739131	4245.08695652174	5165.63043478261	4896.63043478261	5343.21739130435	4521.52173913044	5443.39130434783	5062.28260869565	5101.98913043478	4732.82608695652	5116.02173913044	4778.4347826087	4924.67391304348	4428.60869565217	4544.63043478261	4355.63043478261	4898.39130434783	4220.13043478261	3944.63043478261	4871.13043478261	3924.27173913044	3841.17391304348	3906.13043478261	3681.15217391304	3626.13043478261	3811.36956521739	3958.04347826087	3698.41304347826	4022.5652173913	3676.67391304348	4444.32608695652	3236.67391304348	3257.63043478261	3114.64130434783	3275.95652173913	3057.0652173913	2911.21739130435	2865.20652173913	2882.89130434783	4245.65308036957	2.02508567178247e-13	down-regulated
LEPROT	2233.23913043478	1997.6847826087	1842.95652173913	2033.34782608696	1799.58695652174	1987.45652173913	1822.34782608696	2120.9347826087	2455.47826086957	2204.85869565217	2218.33695652174	2527.77173913044	2516.95652173913	2118.9347826087	2137.71739130435	2516.95652173913	2419.45652173913	2383.86956521739	2213.89130434783	2587.36956521739	2235.95652173913	2553.91304347826	2564.41304347826	2877.13043478261	2683.61956521739	2464.86956521739	2718.54347826087	2680.84782608696	2584.04347826087	2776.28260869565	2511.54347826087	2959.4347826087	2628.82608695652	2942.28260869565	2855.76086956522	2649.05434782609	2720.13043478261	2669.67391304348	2844.86956521739	3016.26086956522	3022.5	2946.71739130435	3034.3152173913	3562.21739130435	3088.26086956522	3338.35869565217	2544.97783273913	2.12855528474937e-13	up-regulated
RMI2	648.586956521739	698.260869565217	650.826086956522	641.804347826087	659.728260869565	695.434782608696	633.663043478261	675.79347826087	466.728260869565	735.989130434783	720.467391304348	664.521739130435	514.391304347826	742.934782608696	733.29347826087	672.239130434783	681.739130434783	670.891304347826	679.434782608696	635.184782608696	699.891304347826	683.260869565217	679.934782608696	627.75	651.391304347826	637.032608695652	662.260869565217	559.217391304348	533.347826086957	559.521739130435	377.45652173913	476.608695652174	439.347826086957	434.760869565217	362.728260869565	395.717391304348	402.152173913044	503.608695652174	263.521739130435	357.010869565217	305.510869565217	317.478260869565	212.5	264.586956521739	247.554347826087	238.45652173913	545.96786176087	2.12855528474937e-13	down-regulated
TUB	1400.27173913043	1278.4347826087	1249.5652173913	1469.38043478261	1270.73913043478	1303.15217391304	1263.19565217391	1492.41304347826	1016.79347826087	1381.76086956522	1394.95652173913	1421.04347826087	1148.10869565217	1262.34782608696	1323.5652173913	1309.34782608696	1338.4347826087	1258.3152173913	1404.30434782609	1246.26086956522	1245.54347826087	1217.13043478261	1238.47826086957	1146.21739130435	1087.42391304348	1110.34782608696	1206.38043478261	942.304347826087	1110.34782608696	1106.54347826087	908.782608695652	966.152173913044	913.391304347826	1203.67391304348	992.684782608696	861.695652173913	799.934782608696	1241.51086956522	723.673913043478	761.576086956522	740.5	853.076086956522	741.086956521739	751.391304347826	670.891304347826	825.260869565217	1121.70414556522	2.21089440728228e-13	down-regulated
F11R	928.586956521739	738.815217391304	836.695652173913	958.836956521739	880.521739130435	851.45652173913	853.739130434783	1005.13043478261	990.934782608696	798.065217391304	964.913043478261	1038.19565217391	974.673913043478	953.5	1171.08695652174	1027.91304347826	1127.22826086957	978.04347826087	1174.27173913043	1056.54347826087	981.369565217391	997.945652173913	1109.01086956522	1191.80434782609	1250.63043478261	1089.40217391304	1120.25	1211.91304347826	1158.36956521739	1130.97826086957	1228.9347826087	1333.10869565217	1249.95652173913	1079.5	1226.89130434783	1210.23913043478	1387.1847826087	1087.54347826087	1414.54347826087	1669.88043478261	1557.5652173913	1392.4347826087	1510	1321.65217391304	1485.32608695652	1422.89130434783	1133.22774680435	2.21089440728228e-13	up-regulated
AOX1	265.95652173913	228.95652173913	261.673913043478	241.423913043478	226.184782608696	232.717391304348	269.804347826087	261.239130434783	710.597826086957	212.5	332.04347826087	297.304347826087	727.673913043478	240.152173913044	353.065217391304	335.25	534.532608695652	270.565217391304	356.141304347826	338.152173913044	515.54347826087	416.652173913044	510.532608695652	426.934782608696	465.20652173913	499.913043478261	460.152173913044	557.978260869565	624.467391304348	557.065217391304	648	623.315217391304	801.5	531.413043478261	830.25	730.282608695652	916.478260869565	511.010869565217	902.543478260869	765.413043478261	1144.63043478261	797.847826086957	896.260869565217	1069.14130434783	1301.47826086957	1031.82608695652	548.516761391304	2.21371583473921e-13	up-regulated
FANCI	7312.72826086957	8096.17391304348	7479.86956521739	8279.10869565218	7588.78260869565	8392.0652173913	7406.36956521739	8442.17391304348	7441.86956521739	8814.32608695652	8168.67391304348	7485.5652173913	7104.95652173913	7943.21739130435	7741.39130434783	7561.91304347826	7588.78260869565	8226.26086956522	7323.47826086957	7751.13043478261	7674.19565217391	8036.4347826087	7730.15217391304	7441.86956521739	7366.4347826087	6810.65217391304	6981.21739130435	7366.4347826087	6961.26086956522	7323.47826086957	6019.71739130435	6326.65217391304	5935.86956521739	7543.71739130435	6126.63043478261	5672.08695652174	5649.34782608696	7580.15217391304	4830.52173913044	4821.69565217391	4743.97826086957	5561.58695652174	4046.51086956522	4509.71739130435	4422.76086956522	4803.10869565217	6922.50048395652	2.22870152494577e-13	down-regulated
IL13RA1	5666.45652173913	5300.5652173913	5002.91304347826	5540.47826086957	5421.58695652174	5508.69565217391	5214.30434782609	5561.58695652174	7136.17391304348	5488.60869565217	5689.52173913043	6132.0652173913	7037.41304347826	6400.17391304348	6019.71739130435	6487.9347826087	6861.69565217391	6262.80434782609	6087.63043478261	6108.1847826087	6326.65217391304	6649.57608695652	6761.91304347826	6992.96739130435	6637.27173913044	6934.17391304348	6712.45652173913	7154.76086956522	7265.82608695652	7231.47826086957	6937.76086956522	6847.13043478261	7130.10869565217	6930.58695652174	7622.95652173913	6997.19565217391	7533.84782608696	6420.1847826087	7892.58695652174	7837.04347826087	7871.5	7806.85869565217	8392.0652173913	7718.32608695652	7479.86956521739	8203.28260869565	6678.62807756522	2.44421229110208e-13	up-regulated
AKAP12	4187.5652173913	4825.54347826087	5561.58695652174	5602.97826086957	6640.34782608696	5787.75	5054.4347826087	5271.5652173913	7491.26086956522	5917.5652173913	5351.08695652174	5578.15217391304	7095.80434782609	7366.4347826087	6443.02173913044	6452.08695652174	7060.86956521739	7678.84782608696	7770.58695652174	7231.47826086957	6949.29347826087	7387.10869565218	6974.73913043478	7164.36956521739	9306.63043478261	9135.02173913044	8279.10869565218	8938.89130434783	8491.65217391304	9135.02173913044	9430	9596.4347826087	9828.78260869565	9935.73913043478	7095.80434782609	10025.3260869565	9170.34782608696	10559.8695652174	9071.91304347826	10602.847826087	9465.58695652174	10542.2826086957	9913.73913043478	9867.17391304348	10269.7608695652	9580	7849.70473819565	2.64116223951661e-13	up-regulated
EPHB2	1421.04347826087	1411.09782608696	1425.45652173913	1150.19565217391	1586.98913043478	1253.32608695652	1454.02173913043	1157.0652173913	1248.5	1413.21739130435	1378.04347826087	1525.39130434783	1419.51086956522	1518.27173913043	1589.28260869565	1576.76086956522	1400.02173913043	1369.04347826087	1282.4347826087	1238.47826086957	1691.63043478261	1128.78260869565	1052.52173913043	1187.86956521739	932.923913043478	1162.02173913043	1016.02173913043	909.478260869565	930.456521739131	767.413043478261	892.086956521739	697.076086956522	811.586956521739	943.260869565217	876.54347826087	799.934782608696	628.717391304348	938.978260869565	692.336956521739	637.891304347826	699.760869565217	741.086956521739	701.673913043478	540.130434782609	555.5	592.673913043478	1094.48937769565	3.06912390009403e-13	down-regulated
FANCG	1073.54347826087	1100.82608695652	988.630434782609	1060.54347826087	954.010869565218	1113.44565217391	976.673913043478	1092.4347826087	836.076086956522	1058.36956521739	1088.72826086957	807.032608695652	843.95652173913	1099.19565217391	996.608695652174	945.369565217391	919.282608695652	1012.16304347826	983.108695652174	854.195652173913	943.630434782609	889.54347826087	932.717391304348	793.478260869565	894.858695652174	791.913043478261	915.282608695652	867.934782608696	840.097826086956	831.695652173913	788.173913043478	819.5	844.663043478261	844.663043478261	774.413043478261	776.141304347826	697.358695652174	872.858695652174	580.913043478261	701.673913043478	646.510869565217	772.108695652174	559.413043478261	611.934782608696	607.956521739131	558.021739130435	868.731557478261	3.21239771845476e-13	down-regulated
KANK2	1351.69565217391	1380.95652173913	1346.28260869565	1074.23913043478	1415.45652173913	1213.82608695652	1394.41304347826	1141.19565217391	1515.22826086957	1233.47826086957	1119.13043478261	1243.63043478261	1356.45652173913	1303.9347826087	1133.73913043478	1208.52173913044	1370.82608695652	1520.13043478261	1147.75	1372.22826086957	1257.34782608696	1677.54347826087	1309.73913043478	1510.82608695652	1690	1571	1434.34782608696	1989.60869565217	1564.45652173913	1589.80434782609	1806.69565217391	2001.84782608696	2137.71739130435	1644.52173913043	1991.36956521739	2210.89130434783	1919.80434782609	1573.91304347826	2257.72826086957	2127.78260869565	2266.05434782609	1777.91304347826	2336.0652173913	2456.28260869565	2166.32608695652	1947.72826086957	1610.0094291087	3.65152735844633e-13	up-regulated
CHAF1B	1017.91304347826	1096.97826086957	993.478260869565	1034.29347826087	1097.82608695652	987.347826086956	1030.23913043478	1039.15217391304	1063.17391304348	1124.5652173913	1145.80434782609	1101.67391304348	1039.07608695652	1338.17391304348	1164.5652173913	1128.97826086957	1143.0652173913	1130.97826086957	1235.03260869565	1066.86956521739	1209.64130434783	1137.3152173913	1113.04347826087	981.934782608696	1035.13043478261	1013.88043478261	963.521739130435	862.815217391304	922.891304347826	971.217391304348	730.978260869565	715.815217391304	668	804.79347826087	598.369565217391	675.032608695652	597.217391304348	820.771739130435	501.478260869565	524.760869565217	566.239130434783	618.336956521739	472.445652173913	469.869565217391	462.586956521739	487.891304347826	910.981803130435	3.65152735844633e-13	down-regulated
FANCA	948.391304347826	1063.84782608696	1064.80434782609	1092.23913043478	1104.45652173913	1078.55434782609	1122.27173913044	996.771739130435	891.565217391304	1052.52173913043	1130.19565217391	1007.8152173913	830.054347826087	1182.63043478261	1153.48913043478	1154.19565217391	958.195652173913	1055.58695652174	1035.63043478261	1058.22826086957	891.565217391304	974.521739130435	915.79347826087	922.521739130435	990.478260869565	872.184782608696	1031.66304347826	880.804347826087	850.173913043478	962.184782608696	741.184782608696	830.728260869565	774	857.434782608696	663.413043478261	877.760869565218	751.391304347826	926.956521739131	601.358695652174	708.04347826087	775.152173913044	666.478260869565	579.804347826087	569.576086956522	546.239130434783	539.152173913044	906.130657456522	3.78463870184414e-13	down-regulated
BEGAIN	59.5217391304348	44.8478260869565	58.1956521739131	53.4347826086957	65.304347826087	49.9021739130435	60.2934782608696	61.4891304347826	44.7391304347826	34.5	49.4673913043478	43.0978260869565	46	63.7826086956522	51.5326086956522	36.9347826086957	45.8695652173913	31.6521739130435	43.8260869565217	38.804347826087	49.0652173913044	40.1086956521739	43.0652173913044	31.8695652173913	34.6304347826087	24.1739130434783	43.5	31.6521739130435	24.3260869565217	37.9565217391304	29.6739130434783	23	25.945652173913	27.8695652173913	27.5217391304348	29.4782608695652	14.1739130434783	24.9565217391304	19.4347826086957	14.8913043478261	22.3478260869565	23.445652173913	12.4782608695652	17.4130434782609	13.8695652173913	17.4565217391304	36.6847825	3.78463870184414e-13	down-regulated
ITGA1	360.195652173913	445.782608695652	450.130434782609	578.217391304348	563.565217391304	530.597826086957	422.695652173913	585.065217391304	693.369565217391	431.086956521739	463.510869565217	534.532608695652	619.021739130435	458.086956521739	460.521739130435	594.739130434783	696.565217391304	483.978260869565	545.402173913044	543.04347826087	513.04347826087	566.978260869565	567.858695652174	684.184782608696	672.608695652174	717.413043478261	715.815217391304	699.54347826087	693.217391304348	777.260869565217	838.771739130435	813.695652173913	852.239130434783	683.260869565217	680.032608695652	637.25	929.152173913043	638.315217391304	1126.53260869565	888.989130434783	946.119565217391	1048.64130434783	1029.23913043478	887.75	1085.34782608696	1020.8152173913	677.699677391304	3.78463870184414e-13	up-regulated
TRAF3	1583.25	1600.91304347826	1657.71739130435	1745.38043478261	1650.26086956522	1469.38043478261	1606.89130434783	1699.89130434783	1365.52173913044	1594.59782608696	1562.76086956522	1648.26086956522	1630.82608695652	1479.76086956522	1591.32608695652	1617.53260869565	1431.92391304348	1470.67391304348	1509.78260869565	1459.21739130435	1662.52173913043	1366.61956521739	1399.73913043478	1435.97826086957	1173.39130434783	1328.02173913044	1417.76086956522	1159.52173913044	1160.69565217391	1167.80434782609	1253.47826086957	1134.88043478261	1219.47826086957	1315.03260869565	1262.34782608696	1234.28260869565	1117.36956521739	1461.01086956522	1154.19565217391	1155.08695652174	1102.19565217391	1199.78260869565	1168.28260869565	970.173913043478	1075.13043478261	1072.15217391304	1381.36532326087	3.99577860333877e-13	down-regulated
C1orf21	445.54347826087	452.739130434783	419.869565217391	534.195652173913	497.217391304348	428.673913043478	424.880434782609	540.760869565217	610.434782608696	452.847826086957	489.619565217391	543.402173913044	484.282608695652	474.217391304348	454.304347826087	548.065217391304	651.913043478261	525.086956521739	486.532608695652	596.521739130435	564.413043478261	586.173913043478	601.108695652174	642.086956521739	695.108695652174	706.978260869565	770.29347826087	764.967391304348	771.804347826087	710.097826086957	683.369565217391	698.260869565217	817.913043478261	584.695652173913	535.04347826087	718.239130434783	820.326086956522	618.119565217391	911.086956521739	791.413043478261	761.576086956522	911.282608695652	841.54347826087	1005.13043478261	958.04347826087	843.021739130435	638.547970326087	4.17881946379946e-13	up-regulated
NBEAL2	1180.39130434783	1037.84782608696	1336.14130434783	1017.30434782609	1282.4347826087	1160.34782608696	1310.71739130435	938.521739130435	2612.03260869565	1270.44565217391	1168.85869565217	1152.5652173913	2156.23913043478	1634.44565217391	1453.77173913043	1568.17391304348	1948.08695652174	2232.39130434783	1494.17391304348	2046.5	1729.21739130435	2470.89130434783	2147.04347826087	2015.76086956522	2687.95652173913	2324.26086956522	2696.26086956522	2914.23913043478	2655.97826086957	2610.98913043478	3585.95652173913	3565.76086956522	3490.95652173913	2367.54347826087	3227.76086956522	4166.69565217391	3928.41304347826	2184.80434782609	3836.63043478261	4936.41304347826	4519.97826086957	2597	5488.60869565217	4256.36956521739	4292	2754.09782608696	2466.36906615217	4.83283127989961e-13	up-regulated
SGPP2	5.93478260869565	12.1304347826087	6.97826086956522	3.84782608695652	6.80434782608696	12.9130434782609	10.9130434782609	2.91304347826087	40.0652173913044	6.43478260869565	14.554347826087	2.95652173913043	44.7826086956522	8.97826086956522	11.3478260869565	11.6630434782609	19.8260869565217	26.1304347826087	15.7173913043478	12.6739130434783	13.0434782608696	23.195652173913	26.3478260869565	19.195652173913	29.6304347826087	35.3260869565217	22.7065217391304	32.6521739130435	36.1521739130435	29.7717391304348	42.4021739130435	63.7826086956522	62.75	34.5978260869565	91.1630434782609	50.6956521739131	78.054347826087	18.5869565217391	55.2391304347826	83.0217391304348	99	72.5652173913043	70.8913043478261	90.0217391304348	111.021739130435	100.95652173913	36.3116719130435	5.29752008495997e-13	up-regulated
OCA2	5.93478260869565	13.1739130434783	13.5978260869565	13.0760869565217	15.8260869565217	11.8695652173913	9.72826086956522	18.5	33.9347826086957	6.43478260869565	16.6739130434783	6.91304347826087	31.8913043478261	15.8913043478261	8.93478260869565	5.91304347826087	28.7391304347826	22.2608695652174	21.5	18.9347826086957	14.1630434782609	26.2608695652174	8.89130434782609	29.8913043478261	35.5217391304348	25.9130434782609	46.6739130434783	35.2608695652174	13.0434782608696	33.8260869565217	35.4456521739131	43.9347826086957	42.2608695652174	35.7391304347826	47.804347826087	28.4239130434783	48.8804347826087	30.6739130434783	71.2608695652174	52.0217391304348	65.6521739130435	63.8586956521739	65.0760869565217	53.2826086956522	62.3586956521739	63.5217391304348	30.4210775652174	5.37235251512413e-13	up-regulated
SRGN	2028.63043478261	2049.41304347826	2001.17391304348	2160.82608695652	2033.34782608696	2473.47826086957	2460.58695652174	1935.95652173913	7892.58695652174	2822.42391304348	2540.45652173913	2586.26086956522	6487.9347826087	4236.13043478261	3668.10869565217	3488.32608695652	5540.47826086957	4889.36956521739	3814.47826086957	3955.82608695652	4651.84782608696	5457.09782608696	5255	5291.04347826087	6509	6312.58695652174	4924.67391304348	6903.30434782609	7479.86956521739	6675.79347826087	9117.60869565217	9643.4347826087	8436.10869565218	4374.54347826087	7923.89130434783	9613.60869565217	10175.152173913	3361.28260869565	11748.4347826087	11186.7391304348	9882.97826086957	9150	12907.8695652174	11599.2391304348	8748.63043478261	10057.7173913043	6009.85318434783	5.49985037959239e-13	up-regulated
ITGA11	1072.15217391304	931.923913043478	1151.32608695652	725.467391304348	1161.83695652174	933.304347826087	949.076086956522	713.673913043478	721.695652173913	1154.42391304348	924.217391304348	897.869565217391	813.695652173913	1010.5	940.54347826087	790.195652173913	752.097826086957	908.782608695652	829	684.086956521739	764.75	833.065217391305	651.554347826087	656.652173913044	727.782608695652	678.434782608696	575.75	647.576086956522	634.304347826087	563.5	560.869565217391	504	632.336956521739	556.347826086957	733.934782608696	547.521739130435	485.021739130435	539.630434782609	472.869565217391	419.804347826087	435.282608695652	363.228260869565	478.054347826087	315.260869565217	379	375.880434782609	708.658315543478	5.79148723274912e-13	down-regulated
ACOX1	3485.91304347826	3211.91304347826	3353.76086956522	3149.52173913044	3479.36956521739	3412.67391304348	3414.15217391304	3191.13043478261	3555.9347826087	3224.19565217391	3326.44565217391	3238.66304347826	3549.28260869565	3265.19565217391	3168.04347826087	3196.60869565217	3409.17391304348	3416.69565217391	3419.58695652174	3489.64130434783	3342.47826086957	3798.73913043478	3912.15217391304	3511.21739130435	3532.26086956522	3574.73913043478	3519.76086956522	3732.89130434783	3615.46739130435	3935.04347826087	3984.86956521739	4016.5	4208.94565217391	3723.86956521739	4211.75	3746.5	3987.30434782609	3774.33695652174	4056.23913043478	3858.34782608696	3833.22826086957	4249.86956521739	4186.13043478261	4150.91304347826	4628.15217391304	4620.30434782609	3666.73723056522	6.46172048181068e-13	up-regulated
ZNF367	1135.34782608696	1165.20652173913	987.206521739131	1193.01086956522	1123.97826086957	1136.96739130435	1027.67391304348	1252.5	899.369565217391	1122.27173913044	1186.28260869565	1107.26086956522	842.413043478261	1250.79347826087	1405.30434782609	1235.78260869565	1110.82608695652	1066.86956521739	1322.13043478261	1168	1327.21739130435	964.369565217391	1057.91304347826	1041.41304347826	880.423913043478	1024.17391304348	986.576086956522	804.576086956522	891.195652173913	915.891304347826	528.434782608696	499.456521739131	549.706521739131	794.576086956522	526.04347826087	489.586956521739	444.315217391304	903.782608695652	395.630434782609	358.152173913044	407.086956521739	510.304347826087	305.869565217391	325.739130434783	360.608695652174	438.173913043478	879.791603913044	6.69014401847622e-13	down-regulated
RRM1	6652.58695652174	6769.10869565217	6776.15217391304	6903.30434782609	6784.10869565217	6827.03260869565	6652.58695652174	7037.41304347826	5987.34782608696	6791	7181.45652173913	6855.76086956522	5711.39130434783	6961.26086956522	7078.71739130435	7037.41304347826	6974.73913043478	6679.47826086957	6903.30434782609	6540.07608695652	6974.73913043478	6246.78260869565	7130.10869565217	6436.10869565217	6835.20652173913	6331.9347826087	6115.78260869565	6251.41304347826	6144	6529.30434782609	5373.41304347826	5551.0652173913	5740.84782608696	5975.86956521739	4700.97826086957	5269.47826086957	5723.26086956522	6190.13043478261	4747.52173913044	4666.21739130435	4604.86956521739	5170.34782608696	3768.91304347826	4473.82608695652	4612.73913043478	4397.08695652174	6110.13442821739	6.73595883825226e-13	down-regulated
MARCKSL1	569.195652173913	585.847826086957	472.369565217391	538.391304347826	611.934782608696	556.565217391304	578.652173913044	525.836956521739	463.184782608696	541.163043478261	638.717391304348	634.652173913044	509.673913043478	560.195652173913	574.5	673.826086956522	527.847826086957	455.847826086957	493.913043478261	539.326086956522	562.152173913044	413.217391304348	473.434782608696	550.065217391304	400.891304347826	482.20652173913	501.086956521739	349.608695652174	439.021739130435	375.630434782609	400.989130434783	345.434782608696	386.891304347826	386.945652173913	316.836956521739	361.45652173913	287.869565217391	418.358695652174	325.402173913044	324.108695652174	320.369565217391	349.891304347826	359.065217391304	270.021739130435	266.086956521739	303.913043478261	457.012999586957	7.20605648768775e-13	down-regulated
ANKRD29	578.434782608696	701.576086956522	631	705.413043478261	668.858695652174	795.891304347826	596.521739130435	666.130434782609	967.217391304348	667.630434782609	547.239130434783	573.391304347826	860.728260869565	813.086956521739	729.402173913044	714.173913043478	982.5	929.065217391304	780.108695652174	764.445652173913	896.826086956522	1018.69565217391	804.695652173913	766.097826086957	988.282608695652	905.152173913043	792.652173913044	1087.54347826087	1099.09782608696	1176.70652173913	1141.84782608696	1164.5652173913	999.260869565217	1099.32608695652	1077.47826086957	1370.21739130435	1220.54347826087	1102.04347826087	1308.02173913043	1688.63043478261	1213.58695652174	982.130434782609	1543.47826086957	1413.21739130435	1224.76086956522	1178.13043478261	955.126156630435	7.2083727423303e-13	up-regulated
HSD11B1	0	1.02173913043478	0	0	0	0	1.17391304347826	0	8.89130434782609	1.17391304347826	2.23913043478261	3.89130434782609	15.9347826086957	1.06521739130435	1.15217391304348	1.89130434782609	9.17391304347826	3.39130434782609	5.32608695652174	1.8695652173913	4.17391304347826	11.9565217391304	12.0652173913043	8.80434782608696	14.8913043478261	24.1739130434783	15.0217391304348	12.3260869565217	13.0434782608696	24.9021739130435	30.8695652173913	29.6521739130435	24.195652173913	15.9673913043478	28.6739130434783	22.304347826087	68.2282608695652	9.45652173913044	69.3913043478261	66.0434782608696	73.8913043478261	35.1956521739131	72.0869565217391	47.6956521739131	84.7608695652174	66.9130434782609	20.5408789130435	8.29139770509294e-13	up-regulated
FGA	896.923913043478	1492.41304347826	1269.80434782609	967.347826086957	1239.54347826087	1676.76086956522	1586.02173913043	875.782608695652	2208.11956521739	1206.76086956522	1477.78260869565	1222.14130434783	1513.97826086957	1516.13043478261	1789.11956521739	1294.5652173913	1339.39130434783	1784.67391304348	1662.20652173913	1351.44565217391	1130.65217391304	1977.54347826087	2287.9347826087	1650.90217391304	2349.15217391304	2787.41304347826	1933.19565217391	2775.64130434783	2966.84782608696	2489.15217391304	3114.0652173913	4087.06521739131	4484.89130434783	2060.21739130435	2733.34782608696	4498.78260869565	4995.9347826087	2106.13043478261	4263.29347826087	5511.13043478261	5885.34782608696	3483.82608695652	4948.15217391304	5652.47826086957	5413.21739130435	3582.89130434783	2555.21994930435	8.29139770509294e-13	up-regulated
PMEPA1	11748.4347826087	10887.9347826087	10282.7391304348	9828.78260869565	12715.7391304348	10542.2826086957	10136.4782608696	10301.8043478261	7631.30434782609	10035.8260869565	10911.0434782609	9744.41304347826	8355.36956521739	8524.04347826087	8457.73913043478	8567.95652173913	8436.10869565218	7574.70652173913	7387.10869565218	7366.4347826087	9605.02173913044	6910.17391304348	7871.5	6822.58695652174	7295.32608695652	7819.36956521739	7533.84782608696	7329.89130434783	7224.30434782609	6646.5652173913	7202.77173913044	6306.63043478261	5617.32608695652	7112.5652173913	6037.19565217391	6652.58695652174	5019.08695652174	7819.36956521739	6383.69565217391	5368.45652173913	5324.19565217391	5649.34782608696	5938.58695652174	4821.69565217391	4646.89130434783	4859.52173913044	7809.88617769565	8.37666617052189e-13	down-regulated
MORC4	3187.91304347826	4131.30434782609	4018.76086956522	3202.83695652174	3763.58695652174	4259	4112.82608695652	3321.09782608696	1800.9347826087	3623.60869565217	3888.89130434783	4032.34782608696	1963.14130434783	3311.52173913044	3242.5	3780.30434782609	2486.86956521739	2966.84782608696	2742.60869565217	3456.30434782609	2605.61956521739	2523.10869565217	2869.26086956522	3035.60869565217	2481.32608695652	2529.73913043478	2829	2321.60869565217	2235.95652173913	2173.13043478261	1757.39130434783	1835.84782608696	1887.65217391304	2166.32608695652	1464.23913043478	1625.55434782609	1770.33695652174	2497.10869565217	1335.95652173913	1389.26086956522	1390.04347826087	1483.16304347826	1110.34782608696	1387.86956521739	1454.52173913043	1289.64130434783	2581.36578828261	8.8002538570674e-13	down-regulated
HASPIN	486.565217391304	456.5	474.913043478261	441.630434782609	464.619565217391	464.130434782609	430.717391304348	443.489130434783	410.065217391304	428.673913043478	437.315217391304	557.358695652174	434.760869565217	441.923913043478	455.630434782609	483.510869565217	462.913043478261	446.108695652174	448.967391304348	458.04347826087	475.097826086957	401.728260869565	401.847826086957	471.728260869565	383.847826086957	440	446.336956521739	437.597826086957	442.826086956522	418.510869565217	360.717391304348	306.152173913044	340.586956521739	355.25	298.20652173913	344.326086956522	268.630434782609	408.45652173913	239.79347826087	257.717391304348	325.326086956522	324.271739130435	206.608695652174	206.434782608696	214.836956521739	263.086956521739	394.951324586957	9.22597714613998e-13	down-regulated
PDE1C	1036.23913043478	1105.73913043478	1222.48913043478	1268.39130434783	1149.26086956522	1175.17391304348	1089.40217391304	1259.23913043478	444.826086956522	1231.0652173913	1182.9347826087	1310	579.304347826087	924.597826086957	1063.03260869565	1177.58695652174	738.097826086957	710.097826086957	833.467391304348	1009.9347826087	776.326086956522	656.652173913044	770.576086956522	818.010869565218	494.347826086957	505.130434782609	676.5	374.70652173913	484.597826086957	506.608695652174	310.684782608696	354.141304347826	344.95652173913	659.29347826087	346.978260869565	253.086956521739	271.739130434783	702.586956521739	227.869565217391	230.608695652174	195.978260869565	363.228260869565	217.021739130435	257.065217391304	255.423913043478	328.989130434783	693.347588456522	1.00656097190313e-12	down-regulated
NABP1	846.923913043478	802.369565217391	800.934782608696	870.826086956522	702.5	924.45652173913	858.467391304348	815.076086956522	1239.17391304348	896.260869565217	925.891304347826	818.869565217391	1042.3152173913	764.967391304348	948.141304347826	928.260869565217	846.521739130435	745.413043478261	904.336956521739	930.673913043478	983.576086956522	979.413043478261	877.760869565218	930.228260869565	1155.22826086957	1102.19565217391	1045.48913043478	1186.60869565217	1535.89130434783	1382.41304347826	1258.5	1323.5652173913	1135.34782608696	1208.76086956522	1398.45652173913	1145.45652173913	1377.79347826087	1145.0652173913	1344.46739130435	1641.47826086957	1470.67391304348	1261.34782608696	1485.32608695652	1837.54347826087	1973.21739130435	1545.52173913043	1116.16751780435	1.18216112048471e-12	up-regulated
ACE	10.2391304347826	3.93478260869565	5.10869565217391	4.21739130434783	3.91304347826087	5.91304347826087	10.9130434782609	7.80434782608696	19.4347826086957	6.43478260869565	8.93478260869565	11.9565217391304	14.6739130434783	13.4347826086957	19.9130434782609	11.6630434782609	9.17391304347826	29.6086956521739	26.1413043478261	16.8913043478261	21.8260869565217	27.2608695652174	16.6086956521739	21.2608695652174	22.6739130434783	31.6521739130435	18.5217391304348	30.804347826087	27.9130434782609	17.3913043478261	22.1739130434783	33.3695652173913	27.3804347826087	14.0869565217391	26.4239130434783	32.8913043478261	40.2717391304348	13.9782608695652	38.8478260869565	40.2717391304348	39.8586956521739	39.054347826087	39.4456521739131	41.8695652173913	47.6086956521739	35.7934782608696	21.9465972826087	1.18216112048471e-12	up-regulated
SFRP1	4243.95652173913	3998.4347826087	3419.58695652174	3457.09782608696	3767.27173913044	3995.5	3728.95652173913	3536.61956521739	2993.41304347826	3658.45652173913	3050.36956521739	3373.48913043478	3467.1847826087	3497.71739130435	3228.36956521739	3396.60869565217	3194.94565217391	3479.36956521739	3030.82608695652	3037.60869565217	3410.71739130435	3451.5	2922.42391304348	3082.08695652174	3027.9347826087	3019.4347826087	2612.65217391304	2829	2940.97826086957	2859.13043478261	2860.20652173913	2592.39130434783	2660.47826086957	3266.76086956522	3455.36956521739	2315.04347826087	2513.30434782609	3022.5	2402.38043478261	2185.94565217391	2355.15217391304	2245.34782608696	2098.26086956522	1887.65217391304	1937.45652173913	2313.80434782609	3039.64556997826	1.18216112048471e-12	down-regulated
MMP28	80.304347826087	61.7391304347826	52.304347826087	63.5	86.804347826087	63.1304347826087	96.7934782608696	60.5	84.4565217391305	72.0217391304348	86.1521739130435	77.9239130434783	94.5	90.7391304347826	88.5326086956522	78.5217391304348	88.6304347826087	102.869565217391	70.7608695652174	93.304347826087	79.6521739130435	96.5652173913043	96.804347826087	93.0869565217391	87.5108695652174	119.945652173913	109.152173913043	118.695652173913	102.826086956522	112.282608695652	112.304347826087	138.5	125.989130434783	84.9130434782609	167.021739130435	128.717391304348	104.45652173913	76	184.152173913043	160.630434782609	170.826086956522	128.554347826087	225.771739130435	212.717391304348	196.652173913043	175.934782608696	108.76417776087	1.44574131595206e-12	up-regulated
IGFBP5	79.2608695652174	58.4891304347826	66.0652173913044	73.4891304347826	52.6086956521739	45.4130434782609	52.6739130434783	92.1413043478261	29.6086956521739	67.0760869565217	68.1847826086957	62.6630434782609	42.2391304347826	52.4565217391304	63.9130434782609	61.9021739130435	43.75	35.0869565217391	52.4347826086957	53.6304347826087	52.304347826087	40.1086956521739	53.8478260869565	56.5217391304348	28.695652173913	33.3913043478261	32.3586956521739	26.2608695652174	51.5217391304348	29.7717391304348	12.695652173913	30.6739130434783	22.3695652173913	14.9782608695652	29.75	15.1304347826087	18.0978260869565	24.9565217391304	15.9130434782609	13.9347826086957	13.1739130434783	9.93478260869565	10.2282608695652	7	5.91304347826087	16.7173913043478	39.550802826087	1.44574131595206e-12	down-regulated
NCAPG	3364.20652173913	3734.15217391304	3531.28260869565	3735.41304347826	3721.47826086957	3810.10869565217	3461.23913043478	3721.47826086957	3480.59782608696	3896.38043478261	3727.13043478261	3518.80434782609	3210.28260869565	3846.57608695652	3916.5652173913	3518.80434782609	3885.0652173913	3744.69565217391	3715.80434782609	3303.5	4074.78260869565	3636.78260869565	3520.71739130435	3247.42391304348	3415.84782608696	3455.36956521739	3215.79347826087	3313.78260869565	3321.9347826087	3171.39130434783	2931.85869565217	2819.15217391304	2891.30434782609	3234.26086956522	2523.9347826087	3089.78260869565	2940.32608695652	3384.76086956522	2530.21739130435	2641.30434782609	2481.32608695652	2897.15217391304	1951.4347826087	2265.11956521739	2083.02173913044	2175	3262.11625334783	1.46123942398546e-12	down-regulated
B4GALT5	5486.21739130435	5182.45652173913	5096.13043478261	4859.52173913044	5220.33695652174	4982.84782608696	5474.52173913044	5007.84782608696	6475.13043478261	4910.36956521739	4722.32608695652	4453.52173913044	5486.21739130435	4053.15217391304	3935.04347826087	3956.9347826087	4756.36956521739	4587.73913043478	4328.25	3732.89130434783	4117.60869565217	4710.32608695652	4828.03260869565	4582.02173913043	5602.97826086957	5373.41304347826	5014.76086956522	6353.73913043478	6150.15217391304	6340.30434782609	6914.89130434783	7265.82608695652	7396.10869565217	6605.10869565218	7588.78260869565	7996.71739130435	7273.15217391304	6895.4347826087	8380.4347826087	8279.10869565218	8315.08695652174	8380.4347826087	9117.60869565217	9058.63043478261	8801.19565217392	8788.15217391304	6018.21386958696	1.55589850238342e-12	up-regulated
CLSPN	1320.77173913043	1160.03260869565	1293.55434782609	1450.34782608696	1373.4347826087	1191.65217391304	1208.76086956522	1379.14130434783	975.434782608696	1266.98913043478	1381.76086956522	1380.95652173913	1145.63043478261	1451.17391304348	1636.47826086957	1328.28260869565	1295.55434782609	1399.34782608696	1586.02173913043	1276.21739130435	1422.32608695652	1183.4347826087	1212.83695652174	1135.20652173913	1079.91304347826	1217.54347826087	1177.9347826087	867.934782608696	997.565217391304	1048.97826086957	838.771739130435	808.619565217391	840.021739130435	983.576086956522	848.565217391304	716.391304347826	673.478260869565	1151.15217391304	485.847826086957	659.54347826087	567.630434782609	747.619565217391	499.456521739131	353.804347826087	462.586956521739	643.489130434783	1067.95156193478	1.55589850238342e-12	down-regulated
RFC5	1731.86956521739	1866.4347826087	1633.80434782609	1699.32608695652	1720.91304347826	1854.52173913043	1742.28260869565	1677.54347826087	1482.09782608696	1578.23913043478	1658.71739130435	1933.65217391304	1455.52173913043	1714.26086956522	1550.19565217391	1955.57608695652	1790.08695652174	1646.98913043478	1484.20652173913	1864.32608695652	1976.54347826087	1580.5652173913	1700.16304347826	1659.95652173913	1436.40217391304	1565.52173913043	1702.13043478261	1419.90217391304	1576.97826086957	1504.78260869565	1330.89130434783	1252.11956521739	1257.15217391304	1422.32608695652	1122.4347826087	1297.33695652174	1222.48913043478	1443.96739130435	1038.34782608696	853.782608695652	1027.4347826087	1183.28260869565	785.228260869565	915.130434782609	956.804347826087	1014.48913043478	1484.49407615217	1.56673020174059e-12	down-regulated
ABCA8	35.2826086956522	27.5434782608696	48.8478260869565	35.4565217391304	36.195652173913	47.5869565217391	31.8369565217391	47.6086956521739	71.1304347826087	41.1521739130435	26.4782608695652	43.0978260869565	70.9130434782609	45.8695652173913	60.2391304347826	44.0326086956522	83.5108695652174	53.3695652173913	42.6086956521739	60.1304347826087	39.0652173913044	59.4782608695652	68.7173913043478	77.8478260869565	81.1521739130435	86.0434782608696	99.4130434782609	85.1304347826087	86.2173913043478	105.217391304348	99.9782608695652	99.4130434782609	102.402173913043	53.6304347826087	75.5434782608696	79.3260869565217	100.804347826087	60.8478260869565	111.152173913043	103.782608695652	99.9565217391304	130.358695652174	110.315217391304	126.217391304348	117.95652173913	130.217391304348	72.6755667826087	1.59252891483455e-12	up-regulated
PLD5	129.04347826087	184.097826086957	175.260869565217	135.804347826087	112.130434782609	146.195652173913	150.717391304348	138.336956521739	318.021739130435	169.021739130435	156.097826086957	172.684782608696	273.228260869565	179.826086956522	149.826086956522	173.847826086957	203.032608695652	149.673913043478	160.347826086957	165.641304347826	148.565217391304	209.347826086957	217.326086956522	229.608695652174	247.79347826087	259.25	278.369565217391	261.45652173913	349.130434782609	372.130434782609	317.597826086957	336.630434782609	390.478260869565	274.79347826087	324.847826086957	321.978260869565	446.95652173913	193.304347826087	437.597826086957	383.065217391304	431.326086956522	499.456521739131	417.847826086957	365.304347826087	586.304347826087	568.913043478261	267.656896695652	1.64712703054063e-12	up-regulated
ITSN1	1088.86956521739	1020.69565217391	1029.69565217391	1129.91304347826	1062.60869565217	994.184782608696	952.717391304348	1178.65217391304	1315.77173913044	919.652173913044	999.413043478261	999.413043478261	1252.5	1090.55434782609	1136.78260869565	1023.13043478261	1171.5	1227.02173913043	1284.13043478261	1320.15217391304	1099.19565217391	1308.20652173913	1246.65217391304	1293.34782608696	1340.73913043478	1319.25	1462.77173913043	1466.86956521739	1360.64130434783	1385.86956521739	1457.34782608696	1543.78260869565	1444.19565217391	1247.02173913043	1475.86956521739	1453.0652173913	1489.95652173913	1202.82608695652	1372.22826086957	1686.60869565217	1509.26086956522	1618.9347826087	1728.3152173913	1456.4347826087	1579.47826086957	1634.13043478261	1290.87734215217	1.69944721648481e-12	up-regulated
MCM3	3621.28260869565	3942.47826086957	3711	3395.79347826087	3587.04347826087	3668.10869565217	3817.15217391304	3325.32608695652	3378.77173913044	3870.95652173913	4043.09782608696	3539.69565217391	3771.13043478261	4571.3152173913	4405.71739130435	3721.47826086957	3692.48913043478	4241.08695652174	3821.29347826087	3460.44565217391	4311.58695652174	3740.54347826087	3719.45652173913	3260.76086956522	3610.26086956522	3594.84782608696	2973.29347826087	3355.65217391304	3325.32608695652	3201.32608695652	2650.30434782609	2526.28260869565	2443.5652173913	2926.35869565217	2497.66304347826	2934.92391304348	2371.19565217391	2854.53260869565	2025.84782608696	2079.39130434783	2223.95652173913	2020.26086956522	1731.86956521739	1791.76086956522	1772.17391304348	1877.09782608696	3204.4761626087	1.7334878698531e-12	down-regulated
GINS4	2617.65217391304	2731.15217391304	2357.96739130435	2940.97826086957	2607.82608695652	2811.28260869565	2352.56521739131	2891.30434782609	2108.02173913044	2439.9347826087	2432.23913043478	2371.19565217391	2264.58695652174	2962.08695652174	3154.5	2514.71739130435	2503.32608695652	2432.78260869565	2836.08695652174	2250.78260869565	2569.4347826087	2361.86956521739	2493.16304347826	2111.84782608696	2105.66304347826	2320.4347826087	1828.08695652174	1971.47826086957	2173.55434782609	2351.20652173913	1666.76086956522	1613.95652173913	1609.34782608696	2468.77173913044	1517.47826086957	1695.94565217391	1579.9347826087	2380.82608695652	1320.52173913043	1358.28260869565	1429.54347826087	1526.73913043478	1115.10869565217	1000.79347826087	1090.71739130435	1282.4347826087	2141.84546415217	1.77298230530152e-12	down-regulated
NBL1	102.826086956522	93.7608695652174	105.630434782609	105.923913043478	96.5869565217391	84.6521739130435	97.5869565217391	126.804347826087	194.021739130435	110.663043478261	124.565217391304	123.695652173913	158.79347826087	160.847826086957	181.902173913044	140.521739130435	203.032608695652	197.347826086957	204.108695652174	181.847826086957	180.195652173913	184.641304347826	187.836956521739	231.065217391304	240.70652173913	195.369565217391	237.760869565217	223.510869565217	202.434782608696	239.195652173913	218.891304347826	280.869565217391	250.369565217391	151.869565217391	217.021739130435	240.826086956522	250.434782608696	148.532608695652	248.717391304348	318.815217391304	340.641304347826	280.228260869565	340.086956521739	353.804347826087	292.771739130435	241.434782608696	197.677219695652	1.82085493454587e-12	up-regulated
RASGRP3	132.565217391304	107.065217391304	79.6304347826087	120.586956521739	110.152173913043	121.347826086957	87.2391304347826	119.119565217391	44.7391304347826	114.521739130435	125.728260869565	110.119565217391	78.9891304347826	92.7391304347826	73.2826086956522	94.3478260869565	100.239130434783	79.1956521739131	51.0869565217391	62.1956521739131	111.304347826087	37.1304347826087	59.1521739130435	47.1739130434783	34.6304347826087	29.6739130434783	29.6739130434783	24.304347826087	34.3804347826087	16.2608695652174	14.8913043478261	12.1304347826087	16.7826086956522	41.2608695652174	19.5869565217391	6.06521739130435	16.0869565217391	34.7173913043478	6.1304347826087	11	16.7173913043478	15.9130434782609	8	10.1521739130435	5.91304347826087	8.43478260869565	55.9208427826087	1.82085493454587e-12	down-regulated
SLC51B	75.6847826086957	91.0217391304348	57.0652173913044	80	88.5217391304348	94.5652173913044	69.9347826086957	77.8695652173913	65.9565217391304	83.2391304347826	90.6630434782609	91.1739130434783	64.9565217391304	110.95652173913	78.2391304347826	75.8260869565217	65.2608695652174	113.945652173913	52.4347826086957	97.9239130434783	62.5652173913044	103.663043478261	102.152173913044	106.032608695652	106.684782608696	111.434782608696	125.326086956522	126.5	108.141304347826	117.010869565217	141.521739130435	144.20652173913	143.489130434783	95.7173913043478	114.260869565217	141.847826086957	173.826086956522	118.521739130435	197.304347826087	151.391304347826	145.369565217391	178.065217391304	167.923913043478	252.869565217391	224.195652173913	184.847826086957	114.567579282609	2.05841117459781e-12	up-regulated
SLC1A4	677.826086956522	693.630434782609	702.891304347826	726.195652173913	732.45652173913	780.108695652174	739.565217391304	742.586956521739	576.086956521739	719	722.130434782609	606.934782608696	534.434782608696	702.891304347826	769.565217391304	621.391304347826	656.652173913044	679.108695652174	801.239130434783	592.586956521739	616.641304347826	586.173913043478	713.673913043478	586.434782608696	580.217391304348	644.521739130435	551.45652173913	610.717391304348	574.913043478261	491.369565217391	542.619565217391	531.956521739131	567.04347826087	576.565217391304	587.891304347826	490.717391304348	467.934782608696	603.619565217391	476.858695652174	465.739130434783	462.29347826087	482.847826086957	364.815217391304	366.173913043478	388.782608695652	401.891304347826	598.068527956522	2.11699741464098e-12	down-regulated
S100P	184.760869565217	218.195652173913	239	194.521739130435	175.45652173913	214.086956521739	222.445652173913	214.913043478261	1030.03260869565	280.152173913044	307.804347826087	254.804347826087	582.097826086957	472.445652173913	512.391304347826	334.260869565217	566.130434782609	582.717391304348	482.79347826087	532.608695652174	426.369565217391	553.521739130435	616.717391304348	710.597826086957	838.652173913044	859.565217391304	988.282608695652	987.206521739131	869.434782608696	974.260869565217	1034.15217391304	1026.96739130435	1094.64130434783	363.576086956522	591.978260869565	1069.77173913043	1118.26086956522	398.010869565217	1506.45652173913	1465.34782608696	1548.57608695652	1333.78260869565	1997.32608695652	1400.95652173913	1637.58695652174	1143.0652173913	742.53664226087	2.16804933976822e-12	up-regulated
EZH2	1011.26086956522	1225.69565217391	1135.20652173913	1075.83695652174	1083.54347826087	1236.97826086957	1157.21739130435	997.380434782609	1200.54347826087	1363.94565217391	1235.35869565217	1057.5652173913	1076.45652173913	1255.89130434783	1079.34782608696	1160.69565217391	1120.82608695652	1268.14130434783	948.54347826087	1085.5	1095.9347826087	1102.04347826087	1036.08695652174	934.760869565218	1007.9347826087	891.336956521739	1034.78260869565	1052.25	952.717391304348	871.695652173913	830.456521739131	796.565217391304	727.54347826087	867.565217391304	768	913.152173913043	878.54347826087	941.847826086956	696.282608695652	788.858695652174	720.891304347826	660.521739130435	686.108695652174	777.95652173913	718.902173913044	588.586956521739	980.810033565217	2.31774995428811e-12	down-regulated
E2F1	1412.80434782609	1464.96739130435	1248.27173913043	1228.32608695652	1206.76086956522	1308.39130434783	1525.39130434783	1170.1847826087	1362.97826086957	1450.65217391304	1347.97826086957	1457.94565217391	1455.52173913043	1675.39130434783	1564.45652173913	1646.69565217391	1383.82608695652	1608.73913043478	1538.05434782609	1397.41304347826	1494.66304347826	1413.01086956522	1313.91304347826	1435.97826086957	1271.17391304348	1282.65217391304	1150.98913043478	1163.51086956522	1228.9347826087	1193.40217391304	768.413043478261	800.152173913044	714.173913043478	1110.20652173913	793.79347826087	866.934782608696	622.391304347826	1042.95652173913	487.663043478261	669.532608695652	570.282608695652	583.804347826087	536.956521739131	440.119565217391	479.565217391304	586.554347826087	1140.79303221739	2.31774995428811e-12	down-regulated
ANPEP	215	213.478260869565	207.29347826087	215.891304347826	249.913043478261	234.978260869565	201	207.532608695652	1654.75	323.45652173913	272.739130434783	252.934782608696	1429.69565217391	461.663043478261	393.684782608696	359.065217391304	954.326086956522	816.782608695652	692.826086956522	558.141304347826	894.521739130435	979.413043478261	927.217391304348	751.065217391304	1265.19565217391	1227.15217391304	975.04347826087	1533.69565217391	1409.89130434783	1046.30434782609	2033.75	1684.3152173913	1492.41304347826	830.25	1649.11956521739	2107.32608695652	1787.89130434783	619.934782608696	2281.10869565217	1962.76086956522	2065.48913043478	1565.23913043478	2541.0652173913	2244.5	2014.01086956522	1720.91304347826	1076.6247671087	2.58227743687622e-12	up-regulated
CLDN7	2.32608695652174	8.97826086956522	1.56521739130435	5.89130434782609	3.10869565217391	10.8478260869565	9	2.91304347826087	38.6739130434783	11.7173913043478	10.0217391304348	5.93478260869565	19.6304347826087	8.97826086956522	10.1521739130435	17.7173913043478	28.7391304347826	20.9565217391304	9.93478260869565	23	18.5869565217391	35.3260869565217	26.3478260869565	34.5978260869565	38.5	35.3260869565217	28.7173913043478	44.8478260869565	31.0326086956522	49.4565217391304	51.7173913043478	52.8260869565218	53.5326086956522	28.7608695652174	52.7065217391304	69.9347826086957	89.2391304347826	18.5869565217391	51.6304347826087	55.8695652173913	101.021739130435	36.1847826086957	97.2391304347826	108.717391304348	111.021739130435	61.9565217391304	35.5167752391304	2.58392741986016e-12	up-regulated
TSPAN5	680.75	685.869565217391	587.45652173913	676.847826086957	619.413043478261	626.032608695652	646.173913043478	712.663043478261	398.04347826087	595.228260869565	701.576086956522	763.739130434783	527.956521739131	608.902173913044	679.434782608696	657.434782608696	551	479.95652173913	703.717391304348	631.086956521739	616.641304347826	484.673913043478	590.978260869565	601.358695652174	410.978260869565	465.5	510.641304347826	367.608695652174	400.108695652174	428	272.978260869565	310.760869565217	289.608695652174	532.695652173913	393.304347826087	284.021739130435	267.5	466.336956521739	250.108695652174	253.304347826087	267.739130434783	335.358695652174	230.521739130435	243.065217391304	253.54347826087	377.391304347826	487.782842739131	2.78237002398049e-12	down-regulated
PDE6A	22.9565217391304	17.7826086956522	27.3260869565217	26.8695652173913	17.6739130434783	28.8695652173913	12.2173913043478	29.0434782608696	65.9565217391304	32	37.2608695652174	13	49.5978260869565	36.1304347826087	31.3478260869565	30.9130434782609	58.2608695652174	42.1739130434783	36.7826086956522	29.695652173913	40.1086956521739	51.5869565217391	40.6413043478261	38.5	63.1521739130435	48.2173913043478	37.7608695652174	58.1195652173913	47.9130434782609	47.2608695652174	70.6521739130435	68.3478260869565	72.5869565217391	59.8260869565218	68.6521739130435	91.5217391304348	96.2173913043478	28.6739130434783	78.4130434782609	97.2608695652174	77.4673913043478	62.0760869565217	94.5869565217391	100.804347826087	94.8913043478261	98.0978260869565	51.7216445434783	2.83452847189228e-12	up-regulated
OPN3	3354.70652173913	3682.52173913044	3255.33695652174	3785.04347826087	3241.19565217391	3728.04347826087	3272.47826086957	3968.54347826087	3751.72826086957	3940.90217391304	3942.47826086957	3394.97826086957	3222.30434782609	3555.9347826087	3412.67391304348	3434.29347826087	3349.9347826087	3454.4347826087	3513.4347826087	3386.34782608696	3161.96739130435	3882.36956521739	3858.34782608696	3730.03260869565	4311.58695652174	4160.17391304348	3651.10869565217	4457.13043478261	4428.60869565217	4740.91304347826	4213.13043478261	4926.71739130435	4369.30434782609	4210.36956521739	4072.32608695652	4176.32608695652	4628.15217391304	4528.17391304348	5138.39130434783	4992.41304347826	4770.9347826087	5011.5	4835.73913043478	6115.78260869565	5245.47826086957	5218.21739130435	4075.706725	2.90258060581119e-12	up-regulated
RPS6KA3	5783.48913043478	6567.78260869565	6537.0652173913	5927.26086956522	6470.98913043478	6707.34782608696	6121.10869565218	5933.15217391304	4687.8152173913	6466.84782608696	5809.96739130435	6672.10869565217	4648.86956521739	6087.63043478261	5383.02173913044	6211.09782608696	4968.04347826087	5801.60869565217	5042.4347826087	5904.44565217391	4666.21739130435	5567.17391304348	5203.34782608696	5501.41304347826	4957.36956521739	4661.27173913043	5071.58695652174	4412.79347826087	4353.96739130435	4555.89130434783	4202.08695652174	4452.16304347826	4343.97826086957	5038.15217391304	4381.02173913043	4598.32608695652	4190.5652173913	5358	4083.95652173913	3801.45652173913	3823.40217391304	4026.76086956522	3674.21739130435	3897.67391304348	4080.54347826087	3934.3152173913	5099.34216723913	2.92591450402239e-12	down-regulated
SCNN1B	1.56521739130435	0	0.804347826086957	0.0869565217391304	0	1	2.56521739130435	0	4.43478260869565	0	0	2.95652173913043	6.08695652173913	3.35869565217391	1.15217391304348	3.89130434782609	9.17391304347826	11.4782608695652	6.54347826086957	1.8695652173913	4.17391304347826	4.95652173913044	19.9891304347826	5.89130434782609	20.7065217391304	12.9347826086957	11.6739130434783	13.1739130434783	22.6304347826087	13.1739130434783	12.695652173913	34.1086956521739	28.1195652173913	20.7391304347826	26.4239130434783	39.8695652173913	34.6086956521739	11.2826086956522	27.9347826086957	26.0108695652174	52.0217391304348	21.695652173913	26.1304347826087	42.9021739130435	49.5	24.5434782608696	14.4534498982609	2.92591450402239e-12	up-regulated
BRCA1	2673.19565217391	2937.32608695652	3059.6847826087	3106.52173913044	3275.95652173913	3275.95652173913	3016.26086956522	2918.42391304348	2277.63043478261	2719.33695652174	2555.34782608696	2885.02173913044	2405.86956521739	3027.32608695652	2967.65217391304	2986.60869565217	2932.5	3078.86956521739	2951.9347826087	2975.91304347826	2568.45652173913	2846.71739130435	2561.73913043478	2841.01086956522	2737.60869565217	2551.58695652174	2650.91304347826	2534.08695652174	2394.63043478261	2565.75	2199.25	2134.25	2519.20652173913	2620.21739130435	2096.02173913044	2173.55434782609	2193.10869565217	2796.55434782609	1799.94565217391	1867.91304347826	1773.80434782609	2133.82608695652	1486.39130434783	1557.84782608696	1594.32608695652	1776.10869565217	2543.52528078261	3.04458750874485e-12	down-regulated
AC008760.2	5.93478260869565	2.02173913043478	1.56521739130435	2	1.34782608695652	0	3.23913043478261	1.02173913043478	11.7826086956522	0	3.43478260869565	0.956521739130435	17.0652173913043	3.35869565217391	1.15217391304348	0.956521739130435	9.17391304347826	10.3695652173913	7.71739130434783	5.89130434782609	7.52173913043478	9.97826086956522	6.69565217391304	9.73913043478261	9.23913043478261	11.0434782608696	16	15	6.26086956521739	15.2173913043478	17.4565217391304	20.1521739130435	11.695652173913	9.02173913043478	16	19.195652173913	11.1847826086957	12.2173913043478	23.1086956521739	20.3260869565217	26.8695652173913	23.445652173913	23.8478260869565	17.4130434782609	17.8804347826087	27.9347826086957	10.726843226087	3.3022852051388e-12	up-regulated
TRIM29	35.2826086956522	31.2934782608696	57.0652173913044	39.7826086956522	41.4347826086957	49.0652173913044	66.5434782608696	29.0434782608696	189.760869565217	65.8913043478261	89.5869565217391	62.6630434782609	174.304347826087	128.782608695652	152.608695652174	90.6956521739131	118.826086956522	113.945652173913	182.282608695652	70.9130434782609	117.75	184.641304347826	197.576086956522	115.336956521739	197.239130434783	216.978260869565	153.836956521739	243.021739130435	250.652173913044	185.54347826087	264.532608695652	280.869565217391	330.608695652174	150.945652173913	250.608695652174	333.771739130435	339.847826086957	117.184782608696	403.521739130435	430.065217391304	433.45652173913	215.739130434783	408.597826086957	353.804347826087	329.847826086957	245.217391304348	185.67320076087	3.52331800594807e-12	up-regulated
CALD1	9098.4347826087	7996.71739130435	8355.36956521739	9291.5652173913	8539.60869565217	8072.45652173913	8329.97826086957	9957.36956521739	24234.6956521739	9150	10096.8913043478	10078.152173913	20034.9565217391	10248.75	9711.0652173913	13010.7391304348	20647.4347826087	14169.847826087	13667.2173913043	17838.9347826087	15175.1956521739	20114.4347826087	17920.8043478261	23785.6086956522	27379.8695652174	22609.2608695652	31571.4130434783	28247.9347826087	26851.652173913	28762.7391304348	28503.4130434783	30932.9130434783	30932.9130434783	17129.3695652174	26057.5869565217	24393.8695652174	29079.3695652174	14551.8260869565	35088.2173913044	27892.4565217391	28503.4130434783	48188.7608695652	31215.1086956522	37050.4347826087	37521.152173913	41194.652173913	21156.1859782609	3.57373966772224e-12	up-regulated
TOM1L2	887.75	817.739130434783	845.20652173913	750.467391304348	770.130434782609	774.413043478261	895.934782608696	746.391304347826	880.663043478261	765.195652173913	738.815217391304	723.54347826087	886.413043478261	766.608695652174	765.326086956522	697.79347826087	680.934782608696	756.902173913044	869.956521739131	703.869565217391	676.217391304348	830.891304347826	868.554347826087	821.369565217391	845.391304347826	813.695652173913	745.760869565217	1001.69565217391	918.652173913044	987.065217391304	988.630434782609	1145.63043478261	1228.10869565217	977.510869565217	1266.58695652174	1202.98913043478	1241.92391304348	918.021739130435	1205.66304347826	1400.95652173913	1427.6847826087	1158.76086956522	1435.97826086957	1296.69565217391	1278.85869565217	1400.95652173913	952.354455195652	4.20375537024049e-12	up-regulated
PSMC3IP	192.95652173913	200.260869565217	197.869565217391	250.304347826087	162.119565217391	179.673913043478	209.70652173913	213.826086956522	192.29347826087	265.217391304348	263.152173913044	224.934782608696	218.95652173913	243.239130434783	222.565217391304	236.782608695652	210.608695652174	244.021739130435	235.847826086957	188.521739130435	227.217391304348	179.217391304348	174.45652173913	141.695652173913	155.326086956522	150.45652173913	138.695652173913	139.521739130435	172.086956521739	146.521739130435	133.913043478261	85.8152173913044	111.260869565217	158.934782608696	99	127.826086956522	110.663043478261	175.326086956522	84.4239130434783	100.152173913044	101.021739130435	80.0869565217391	95.6630434782609	68.8478260869565	77.3695652173913	76.2173913043478	166.621218565217	4.30459599022591e-12	down-regulated
IQCN	19.3695652173913	22.4891304347826	18.3913043478261	20.304347826087	13.5869565217391	17.804347826087	17.2173913043478	18.5	19.4347826086957	13.0652173913043	12.3478260869565	15.0652173913043	18.3913043478261	26.1304347826087	23.9782608695652	19.695652173913	24.0217391304348	33.9130434782609	27.3913043478261	26.1739130434783	18.5869565217391	29.3913043478261	26.3478260869565	32.804347826087	36.5652173913044	35.3260869565217	22.0652173913044	25.2717391304348	19.5	14.2391304347826	35.4456521739131	32.4347826086957	33.3695652173913	36.9239130434783	45.6304347826087	39.8695652173913	45.6304347826087	25.8695652173913	40.0978260869565	42.9239130434783	47.8260869565218	48.7391304347826	40.5434782608696	51.5434782608696	50.4891304347826	57.5434782608696	29.1793479782609	4.46999402207486e-12	up-regulated
MFHAS1	1975.5	1992.57608695652	1954.92391304348	2024.23913043478	2097.17391304348	2033.75	1955.30434782609	2220.33695652174	1337.69565217391	1927.73913043478	1998.47826086957	2264.58695652174	1386.04347826087	1593.54347826087	1777.91304347826	2014.41304347826	1563.41304347826	1482.64130434783	1748.82608695652	1708.84782608696	1763.41304347826	1397.1847826087	1493.65217391304	1687.73913043478	1319.0652173913	1398.45652173913	1617.26086956522	1250.63043478261	1277.07608695652	1380.23913043478	1251.64130434783	1174.27173913043	1303.15217391304	1429.20652173913	1293.76086956522	1162.66304347826	1077.94565217391	1513.97826086957	1001.47826086957	996.293478260869	1173	1286.80434782609	909.315217391304	987.206521739131	1166.63043478261	1244.92391304348	1535.10725904348	4.51196461569713e-12	down-regulated
TRIM26	741.086956521739	617.717391304348	721.815217391304	687.652173913044	652.021739130435	628.25	734.173913043478	686.608695652174	830.456521739131	614.217391304348	686.706521739131	645.706521739131	769.739130434783	702.891304347826	697.913043478261	593.826086956522	700.358695652174	790.728260869565	690.217391304348	565.771739130435	608.739130434783	807.315217391304	848.195652173913	694.717391304348	834.913043478261	913.728260869565	707.760869565217	988.282608695652	964.608695652174	870.673913043478	1123.17391304348	1058.83695652174	1131.76086956522	900.619565217391	1141.29347826087	1205.47826086957	1188.13043478261	842.271739130435	1157.0652173913	1287.71739130435	1348.13043478261	1023.80434782609	1413.01086956522	1082.95652173913	1114.59782608696	1080.96739130435	871.665382978261	4.67082403768135e-12	up-regulated
IGFBP3	3265.19565217391	3927.14130434783	5314.0652173913	4884.26086956522	4968.04347826087	4124.19565217391	5801.60869565217	4495.23913043478	3051.60869565217	3866.52173913044	4470.9347826087	5430.78260869565	2940.97826086957	4900.15217391304	5324.19565217391	5474.52173913044	4930.53260869565	3731.10869565217	3949	4139.86956521739	5395.91304347826	2617.05434782609	3163.51086956522	3306.23913043478	2321.25	3114.64130434783	2927.13043478261	1763.9347826087	2233.58695652174	2092.04347826087	1489.6847826087	1041.04347826087	1537.5	2099.63043478261	940.434782608696	1065.45652173913	1596.16304347826	2551.16304347826	1366.89130434783	900.130434782609	1373.1847826087	1385.46739130435	1171.5	669.771739130435	1173	1045.65217391304	3028.95513252174	4.75962481627051e-12	down-regulated
ANTXR1	20979.3043478261	20114.4347826087	20034.9565217391	23785.6086956522	22745.7173913044	20210.7173913043	19739.5652173913	24809.4565217391	19739.5652173913	21765.0434782609	21640.4782608696	23656.0434782609	22332.6086956522	22229.3913043478	21494.6956521739	23211.4565217391	22109.4782608696	19739.5652173913	20545.6086956522	21879.4565217391	21989.1086956522	18721.2826086957	20034.9565217391	20545.6086956522	16841.8695652174	17500.1086956522	18862.7608695652	15760.3043478261	16170.5869565217	16982.5869565217	15671.9782608696	14321.8913043478	14824.4565217391	19739.5652173913	16800.0108695652	13568.1956521739	14551.8260869565	20647.4347826087	13702.6086956522	12074.5652173913	12944.0434782609	15235.3260869565	13568.1956521739	12810.3695652174	13263.9347826087	15235.3260869565	18589.8274858696	4.97504475220544e-12	down-regulated
RNF121	847.728260869565	812.826086956522	882.54347826087	783.195652173913	817.239130434783	726.315217391304	848.95652173913	774	639.326086956522	816.021739130435	899.217391304348	838.652173913044	746.739130434783	790.076086956522	859.673913043478	821.673913043478	764.869565217391	720.130434782609	781.967391304348	721.934782608696	816.217391304348	662.95652173913	682.369565217391	687.652173913044	611.652173913044	665.652173913044	588.326086956522	621.913043478261	564.065217391304	563.5	524.760869565217	574.260869565217	598.369565217391	645.706521739131	608.217391304348	670.608695652174	565.413043478261	636.021739130435	510.826086956522	597.913043478261	624.467391304348	522.478260869565	561.608695652174	514.119565217391	542.326086956522	505.130434782609	686.078687478261	5.31023587282e-12	down-regulated
CUX2	5	4.93478260869565	2.39130434782609	1.32608695652174	3.10869565217391	0	3.23913043478261	8.78260869565217	53.4347826086957	2.43478260869565	6.80434782608696	5.93478260869565	20.7391304347826	2.17391304347826	2.39130434782609	1.89130434782609	20.8478260869565	5.89130434782609	8.80434782608696	4.82608695652174	9.76086956521739	9.97826086956522	13.1739130434783	14.4347826086957	29.6304347826087	38.8804347826087	22.0652173913044	56.6304347826087	59.9130434782609	35.9782608695652	41.2608695652174	50.5869565217391	66.1956521739131	48.6630434782609	64.3260869565217	68.0217391304348	89.2391304347826	24.0652173913044	68.2282608695652	64.9891304347826	65.6521739130435	102.934782608696	69.75	49.7826086956522	77.3695652173913	102.858695652174	32.8114367826087	5.80761684340567e-12	up-regulated
HERC3	731.152173913044	641.717391304348	677.326086956522	645.630434782609	697.239130434783	581.695652173913	647.326086956522	686.608695652174	1233.78260869565	811.021739130435	869.956521739131	794.239130434783	997.195652173913	708.576086956522	778.25	824.369565217391	1051.33695652174	792.934782608696	874.108695652174	845.391304347826	926.347826086957	930.967391304348	1030.98913043478	979.913043478261	1037.29347826087	1048.34782608696	1037.84782608696	1042.95652173913	1168.65217391304	1191.95652173913	1115.47826086957	994.608695652174	1056.23913043478	953.108695652174	1269.97826086957	1037.29347826087	1097.19565217391	969.086956521739	1249.11956521739	1136.96739130435	1171.5	1367.58695652174	1206.38043478261	1359.29347826087	1412.25	1555.54347826087	983.407826565217	6.13469979784354e-12	up-regulated
CDH16	6.80434782608696	14.195652173913	13.5978260869565	2	2.19565217391304	7.84782608695652	12.2173913043478	3.8695652173913	272.815217391304	20.9782608695652	21.9782608695652	11.0434782608696	210.913043478261	59.2717391304348	56.5	60.7608695652174	178.29347826087	198.652173913043	123.586956521739	117.826086956522	82.5760869565217	259.597826086957	240.260869565217	188.782608695652	285.173913043478	235.869565217391	240.413043478261	318.434782608696	339.369565217391	247.554347826087	335.673913043478	400.315217391304	493.032608695652	51.5217391304348	489.804347826087	485.413043478261	532.380434782609	25.8695652173913	462.826086956522	517.347826086957	590.076086956522	284.347826086957	599.239130434783	608.739130434783	668.54347826087	392.434782608696	234.150991804348	6.13469979784354e-12	up-regulated
FANCD2	1852.8152173913	1987.78260869565	1933.42391304348	1882.26086956522	2068.10869565217	2120.5652173913	1948.40217391304	1758.0652173913	1766.72826086957	2105.66304347826	1972.30434782609	1852.4347826087	1880.39130434783	2049.08695652174	1989.98913043478	1972.30434782609	1938.26086956522	2087.97826086957	1902.19565217391	1965.0652173913	1907.63043478261	2045.84782608696	1920.58695652174	1816.17391304348	1890.10869565217	1705.71739130435	1722.04347826087	1833.40217391304	1879.66304347826	1782.64130434783	1676.4347826087	1635.47826086957	1608.73913043478	1760.30434782609	1600.28260869565	1810.21739130435	1515.80434782609	1881.11956521739	1395.4347826087	1468.88043478261	1245.54347826087	1411.97826086957	1255.73913043478	1283.46739130435	1180.63043478261	1287.32608695652	1772.9352258913	6.83884932289543e-12	down-regulated
RFC3	3566.9347826087	3988.5652173913	3521.54347826087	4252.5652173913	3669.19565217391	4205.02173913044	3559.3152173913	4228.54347826087	3157.89130434783	4590.52173913044	4377.63043478261	4573	2821.21739130435	3944.63043478261	3967.28260869565	4565	3855.54347826087	3602.13043478261	3636.78260869565	4286.52173913043	4080.54347826087	3286.76086956522	3677.8152173913	3897.67391304348	3303.5	3403.78260869565	3533.9347826087	2765.65217391304	3134.4347826087	3683.89130434783	2191.89130434783	2188.82608695652	2056.28260869565	2872.13043478261	1713.94565217391	1714.97826086957	2071.84782608696	3374.17391304348	1827.5	1525.39130434783	1688.33695652174	2351.20652173913	1382.89130434783	1724.13043478261	1723.5652173913	2067.28260869565	3165.48272023913	7.41438769245278e-12	down-regulated
RSPO3	6060.76086956522	5958.4347826087	5190.47826086957	6121.10869565218	5878.63043478261	5787.75	5351.08695652174	6207.95652173913	3661.61956521739	5892.66304347826	6288.41304347826	5973.28260869565	4345.3152173913	5707.23913043478	5904.44565217391	5672.08695652174	4345.3152173913	4905.02173913044	4833.91304347826	4821.69565217391	5184.5652173913	4264.52173913044	4780.04347826087	4439.60869565217	3555.9347826087	3833.22826086957	3836.63043478261	3633.15217391304	3549.28260869565	3525.5	3483.82608695652	3294.19565217391	3095.17391304348	4087.06521739131	3674.21739130435	3805.69565217391	3248.23913043478	4587.73913043478	3465.30434782609	3311.52173913044	3096.5	3185.13043478261	3274.15217391304	3265.19565217391	2741.35869565217	3146.28260869565	4440.68008030435	8.77510774912418e-12	down-regulated
PHLDB2	5761.63043478261	4799.04347826087	5836.47826086957	6403.80434782609	6060.76086956522	5236.5	5777.17391304348	6495.39130434783	6575.26086956522	5738.14130434783	6013.9347826087	6097.75	5054.4347826087	5267.39130434783	5333.78260869565	5715.95652173913	5170.34782608696	4720.48913043478	4863.78260869565	5100.17391304348	5073.59782608696	4689.19565217391	5136.45652173913	5312.44565217391	6177.47826086957	6417	6032.34782608696	7248.26086956522	6807.80434782609	7309.28260869565	8768.47826086956	8867.07608695652	10618	7976.76086956522	7164.36956521739	8889.52173913043	10490.847826087	8442.17391304348	11286.4347826087	10681.8695652174	10508.7826086957	11165.0869565217	11118.1956521739	10911.0434782609	11018.5	9306.63043478261	7161.73624484783	9.43477372040651e-12	up-regulated
XRCC3	475.326086956522	524.847826086957	439.880434782609	423.836956521739	534.315217391304	484.065217391304	468.380434782609	415.391304347826	458.673913043478	539.152173913044	477.978260869565	539.239130434783	454.739130434783	579.934782608696	538.978260869565	583.804347826087	521.130434782609	579.304347826087	466.652173913044	500.54347826087	531.619565217391	486.5	456.5	482.739130434783	448.967391304348	491.163043478261	438.978260869565	410.978260869565	370.478260869565	423.695652173913	363.467391304348	294.967391304348	347.010869565217	435.978260869565	311.521739130435	378.804347826087	301.402173913044	396.391304347826	270.369565217391	257.717391304348	262.902173913044	281.434782608696	233.95652173913	229.554347826087	202.565217391304	246.434782608696	420.918949326087	9.53777984597096e-12	down-regulated
CDH19	242.521739130435	228.95652173913	179.782608695652	220.630434782609	209.695652173913	183.945652173913	201.782608695652	266.195652173913	120.510869565217	272.565217391304	269.54347826087	296.652173913044	195.978260869565	219.228260869565	192.5	255.804347826087	168.695652173913	186.097826086957	173.163043478261	239.54347826087	207.75	195.369565217391	192.45652173913	231.847826086957	141.95652173913	146.217391304348	162.152173913043	117.923913043478	112.717391304348	132.5	96.5869565217391	80.5978260869565	63.7391304347826	149.782608695652	122.891304347826	67.0217391304348	55.6413043478261	140.54347826087	69.3913043478261	48.3695652173913	53.5	63.8586956521739	56.5217391304348	85.4021739130435	48.5652173913044	84.9347826086957	157.652882413043	9.6015853726417e-12	down-regulated
OTULINL	163.239130434783	165.641304347826	183.608695652174	239.130434782609	147.913043478261	159.945652173913	202.804347826087	271.673913043478	2858.60869565217	284.021739130435	306.728260869565	303.032608695652	2035.60869565217	667.771739130435	663.869565217391	727.413043478261	1870.88043478261	1145.0652173913	1375.73913043478	1223.52173913043	1099.19565217391	1745.0652173913	1748.54347826087	1873.89130434783	2639.76086956522	2271.15217391304	2533.30434782609	2862.44565217391	2797.08695652174	2822.42391304348	2571.58695652174	3007	3366.16304347826	1667.04347826087	2777.60869565217	2520.4347826087	3414.15217391304	1182.36956521739	3065.26086956522	3047.69565217391	3519.76086956522	3444.19565217391	2943.04347826087	3378.77173913044	3412.67391304348	3295.5652173913	1826.13943671739	9.63964257533536e-12	up-regulated
CIDEC	37.0869565217391	57.4782608695652	51.0217391304348	38.5760869565217	85.8695652173913	82.4782608695652	117.652173913043	47.6086956521739	1815.02173913043	158.652173913043	152.021739130435	156.217391304348	979.413043478261	566.673913043478	612.260869565218	420.478260869565	900.130434782609	809.891304347826	705.152173913044	647.815217391304	590	959.021739130435	925.652173913043	857.434782608696	1355.25	1524.95652173913	1301.86956521739	1796.60869565217	1590.39130434783	1284.41304347826	1965.71739130435	2129.36956521739	2317.78260869565	645.706521739131	1763.41304347826	2732.10869565217	2556.9347826087	424.521739130435	3152.80434782609	3765.63043478261	3488.32608695652	1765.55434782609	4555.89130434783	3089.78260869565	2833.13043478261	1780.11956521739	1295.51934773913	9.63964257533536e-12	up-regulated
FEN1	1361.08695652174	1238.26086956522	1196.45652173913	1061.75	1240.73913043478	1208.76086956522	1382.0652173913	1067.01086956522	1270.73913043478	1538.53260869565	1419.30434782609	1269.28260869565	1330.89130434783	1589.28260869565	1371.34782608696	1231.0652173913	1283.17391304348	1420.84782608696	1373.91304347826	1153.77173913043	1449.76086956522	1244.57608695652	1152.44565217391	1113.91304347826	1131.10869565217	1193.89130434783	1114.41304347826	1135.34782608696	1037.47826086957	940.032608695652	943.739130434783	914.815217391304	922.891304347826	875.782608695652	968.152173913044	1126.25	854.5	910.152173913044	814.173913043478	763.880434782609	790.195652173913	735.989130434783	707.478260869565	648.847826086957	518.869565217391	598.195652173913	1100.32965336957	9.82774054331377e-12	down-regulated
KIF18A	2962.08695652174	3176.73913043478	3149.52173913044	3121.75	3076.58695652174	3561.3152173913	3036.23913043478	2995.19565217391	2330.47826086957	2870.80434782609	2784.80434782609	3065.97826086957	2158.10869565217	2577.39130434783	2481.32608695652	2742.08695652174	2733.97826086957	2386.39130434783	2308.63043478261	2470.89130434783	2598.52173913044	2289.15217391304	2366.45652173913	2361.15217391304	2249.86956521739	2418.96739130435	2257.21739130435	2169.76086956522	2302.02173913044	2364.51086956522	2160.0652173913	1929.36956521739	2158.73913043478	2389.86956521739	1840.26086956522	2008.69565217391	2081.34782608696	2810.69565217391	1959.94565217391	1896.10869565217	1859.45652173913	2148.78260869565	1701.8152173913	1661.89130434783	1779.5652173913	1723.84782608696	2423.44331378261	1.07776641019621e-11	down-regulated
OLFM2	100.065217391304	101.804347826087	94.5	84.8260869565217	109.304347826087	98.9347826086957	110.04347826087	89.7717391304348	65.9565217391304	97.0434782608696	87.2173913043478	99.9565217391304	77.9239130434783	119.021739130435	90.7282608695652	99.1521739130435	70.7391304347826	117.097826086957	104.934782608696	69.7717391304348	78.9565217391304	86.304347826087	88.3695652173913	70.7282608695652	58.1739130434783	75.1956521739131	55.1195652173913	59.7173913043478	58.1956521739131	74.7826086956522	61.2608695652174	62.1086956521739	48.5108695652174	69.2391304347826	60.4782608695652	69.9347826086957	33.8260869565217	76	31.5434782608696	40.2717391304348	38.8804347826087	29.0217391304348	42.8913043478261	37.9782608695652	22.1086956521739	43.1086956521739	73.076086826087	1.12480766487565e-11	down-regulated
DHCR24	2038.33695652174	2001.17391304348	1738.39130434783	1569.23913043478	1654.75	1820.96739130435	1848.21739130435	1544.34782608696	1918.38043478261	1863.60869565217	1896.38043478261	2010.38043478261	1906.82608695652	2394.26086956522	2683.61956521739	2300.41304347826	1736.84782608696	2261.25	2434.47826086957	2037.36956521739	1612.4347826087	2550.73913043478	2300.41304347826	2266.45652173913	2432.78260869565	2504.41304347826	2164.27173913044	2761.78260869565	2488.21739130435	2422.60869565217	2946.01086956522	3767.27173913044	3309.89130434783	2427	3482.82608695652	3921.59782608696	3770.02173913044	2084.97826086957	4091.9347826087	5293.48913043478	4718.65217391304	2890.70652173913	5086.06521739131	4841.47826086957	4431.63043478261	3338.35869565217	2686.20153121739	1.12692759159607e-11	up-regulated
PIK3C2B	598.913043478261	560.086956521739	745.29347826087	740.380434782609	788.586956521739	669.630434782609	676.391304347826	687.45652173913	788.673913043478	565.195652173913	676.695652173913	656.032608695652	674.554347826087	648.5	801.75	727.413043478261	820.891304347826	807.315217391304	805.456521739131	859.565217391304	623.945652173913	806.315217391304	804.695652173913	859.95652173913	848.032608695652	874.108695652174	1032.69565217391	791.695652173913	817.739130434783	879.902173913044	876.065217391304	901.5	1104.45652173913	735.706521739131	873.130434782609	916.315217391304	1077.94565217391	779.891304347826	1015.45652173913	1135.20652173913	1047.19565217391	1182.36956521739	1107.65217391304	1095.76086956522	1217.97826086957	1095.9347826087	843.487729304348	1.13567787340991e-11	up-regulated
HGD	1295.08695652174	1302.05434782609	1232.41304347826	861.586956521739	1392.4347826087	1244.57608695652	1333.10869565217	911.760869565217	1317.82608695652	1324.32608695652	1281.5652173913	930.760869565217	940.54347826087	1357.80434782609	1236.27173913043	1094.01086956522	1063.69565217391	1679.44565217391	1141.04347826087	1273.08695652174	935.532608695652	1814	1939.69565217391	1394.17391304348	2154.10869565217	1977.54347826087	1800.30434782609	2498.84782608696	2119.76086956522	2027.9347826087	2334.44565217391	2607.15217391304	2463.73913043478	1226.89130434783	2216.19565217391	2350.76086956522	2708.02173913044	1515.80434782609	2718	2595.27173913044	2516.42391304348	1986.13043478261	2958	3334.17391304348	3529.35869565217	2246.82608695652	1786.57610086957	1.14445248552089e-11	up-regulated
C5AR1	37.0869565217391	24.4347826086957	32.0978260869565	31.1521739130435	45.6956521739131	40.4130434782609	24.4347826086957	31.9347826086957	40.0652173913044	24.8695652173913	18.6630434782609	24.9347826086957	38.8478260869565	28.6086956521739	33.5760869565217	28.7826086956522	24.0217391304348	39.8695652173913	42.6086956521739	24.0869565217391	21.8260869565217	36.2391304347826	50.5652173913044	32.804347826087	53.3695652173913	48.2173913043478	32.3586956521739	33.5434782608696	62.7934782608696	39.945652173913	57.5434782608696	51.7282608695652	56.2173913043478	83.2391304347826	78.1195652173913	45.8913043478261	69.3913043478261	88.6086956521739	87.0434782608696	83.0217391304348	75.1304347826087	70.5869565217391	119.326086956522	89.2826086956522	75.6521739130435	81.7065217391304	49.1377600869565	1.25554900499202e-11	up-regulated
XRCC2	859.565217391304	1041.54347826087	994.760869565217	1156.04347826087	1038.90217391304	1103.51086956522	898.858695652174	1171.82608695652	706.086956521739	1255.58695652174	1065.15217391304	1128.0652173913	711.195652173913	898.858695652174	935.326086956522	1257.83695652174	942.5	887.467391304348	872.695652173913	1179.39130434783	958.04347826087	918.304347826087	828.163043478261	930.228260869565	831.826086956522	724.108695652174	897.869565217391	725.760869565217	748.804347826087	827.956521739131	528.434782608696	564.413043478261	507.239130434783	825.880434782609	430.304347826087	472.04347826087	481.282608695652	902.228260869565	392.695652173913	422.141304347826	357.967391304348	610.434782608696	303.032608695652	384.141304347826	408.391304347826	473.934782608696	794.800076608696	1.30385061494266e-11	down-regulated
PHKA1	2245.66304347826	2245.97826086957	2368.64130434783	2499.47826086957	2446.5	2469.19565217391	2489.65217391304	2497.10869565217	3581.86956521739	2607.82608695652	2352.10869565217	2209.63043478261	3288.26086956522	2888.17391304348	2777.60869565217	2470.34782608696	3101.71739130435	3197.47826086957	2859.65217391304	2693.84782608696	2828.10869565217	3547.26086956522	3101.71739130435	2897.15217391304	3254.65217391304	3172.84782608696	3012.17391304348	3534.72826086957	3142.02173913044	3357.4347826087	3847.69565217391	4038.5652173913	3956.9347826087	3540.84782608696	4242.52173913043	4093.25	3981.78260869565	3253	4016.5	4257.6847826087	4091.9347826087	3688.84782608696	4299.52173913044	3959.11956521739	3447.3152173913	3697.15217391304	3207.6415368913	1.33256178643519e-11	up-regulated
PCNA	17694.2608695652	22745.7173913044	19210.6739130435	20210.7173913043	18257.8695652174	21989.1086956522	20210.7173913043	19513.0869565217	15760.3043478261	17694.2608695652	18639.9782608696	20647.4347826087	17500.1086956522	23360.5217391304	21765.0434782609	21989.1086956522	21640.4782608696	20764.847826087	20866.5434782609	20647.4347826087	21879.4565217391	18530.8695652174	18639.9782608696	18639.9782608696	17838.9347826087	18817.347826087	15402.7173913043	16674.5217391304	18085.8913043478	18257.8695652174	13348.1956521739	12286.8043478261	11516.3913043478	17361.8695652174	11496.9130434783	11449.2173913043	13667.2173913043	17500.1086956522	11035.5217391304	9896.73913043478	10977.1739130435	10335.2826086957	8168.67391304348	9518.58695652174	9882.97826086957	10227.5869565217	16794.4572145652	1.33353793160838e-11	down-regulated
KLHL29	103.804347826087	116.304347826087	109.25	108.54347826087	136.04347826087	92.5217391304348	102.217391304348	112.684782608696	257.184782608696	79.2934782608696	97.1956521739131	98.0978260869565	209.45652173913	78.2391304347826	112.934782608696	108.54347826087	227.608695652174	132.45652173913	141.565217391304	153.978260869565	140.391304347826	217.717391304348	201.521739130435	238.934782608696	251.652173913043	263.195652173913	280.869565217391	269.184782608696	285.934782608696	256.141304347826	278.423913043478	309.717391304348	333.097826086957	167.434782608696	237.239130434783	297.108695652174	309.347826086957	140.54347826087	354.141304347826	357.010869565217	355.467391304348	307.880434782609	408.597826086957	335.847826086957	368.728260869565	275.20652173913	213.462196304348	1.33353793160838e-11	up-regulated
CYP4F22	0	0	1.56521739130435	2	0.673913043478261	3.91304347826087	0.5	2.91304347826087	4.43478260869565	0	2.23913043478261	0.956521739130435	3.69565217391304	3.35869565217391	2.39130434782609	2.84782608695652	6	5.89130434782609	2.02173913043478	0	2.06521739130435	3.95652173913043	2.10869565217391	5.89130434782609	2.78260869565217	7.30434782608696	7.02173913043478	7.89130434782609	7.95652173913044	14.2391304347826	11.4565217391304	7.89130434782609	20.7173913043478	5.07608695652174	10.2608695652174	9.10869565217391	10.1521739130435	4.80434782608696	30.4347826086957	15.9565217391304	34.4347826086957	21.695652173913	27.2065217391304	25.1521739130435	33.2391304347826	21.2608695652174	8.59711697173913	1.33353793160838e-11	up-regulated
RPA1	5917.5652173913	5901.84782608696	5686.47826086957	5413.21739130435	5822.0652173913	5862.41304347826	5809.96739130435	5524.76086956522	5032.63043478261	5347.21739130435	5448.28260869565	5073.59782608696	5161.76086956522	5927.26086956522	5732.85869565217	5002.91304347826	5409.5	5923.15217391304	5638.60869565217	5198.71739130435	5749.91304347826	5324.19565217391	5283.47826086957	5132.21739130435	5149.67391304348	5319.26086956522	5163.73913043478	5227.65217391304	4970.0652173913	4849.89130434783	5062.28260869565	4926.71739130435	5019.08695652174	5163.73913043478	5218.21739130435	5092.02173913044	4964.47826086957	4928.76086956522	4440.86956521739	4538.39130434783	4705.95652173913	4457.13043478261	4266.97826086957	4222.78260869565	4307.32608695652	4367.32608695652	5188.84711152174	1.33624789670835e-11	down-regulated
IDS	4679.95652173913	4473.82608695652	4924.67391304348	4598.32608695652	4307.32608695652	4048.02173913044	4536.76086956522	5071.58695652174	3307.14130434783	4803.10869565217	5465.15217391304	4651.84782608696	3791.19565217391	4023.9347826087	4408.52173913044	4117.60869565217	3780.30434782609	3821.29347826087	4679.95652173913	4071.13043478261	3868.01086956522	3887.67391304348	4017.63043478261	3723.86956521739	3675.44565217391	3522.36956521739	3771.13043478261	2947.9347826087	3277.09782608696	3492.71739130435	2693.84782608696	3098.82608695652	3254.65217391304	3998.4347826087	3231.69565217391	2694.41304347826	2775	3955.82608695652	2310.63043478261	2593.34782608696	2764.65217391304	2930.46739130435	2396.80434782609	2757.94565217391	2995.19565217391	2889.45652173913	3719.2771626087	1.36482349377896e-11	down-regulated
USP1	3447.3152173913	3653.67391304348	3229.94565217391	3565.76086956522	3458.77173913044	3740.54347826087	3302.65217391304	3496.63043478261	3289.95652173913	3674.21739130435	3306.23913043478	3880	3384.76086956522	3740.54347826087	3685.3152173913	4008.97826086957	3866.52173913044	3560.41304347826	3639.10869565217	4025.34782608696	4150.91304347826	3301.92391304348	3514.4347826087	3615.46739130435	3185.13043478261	3409.17391304348	3244.52173913044	2939.67391304348	3294.88043478261	3341.73913043478	2553.30434782609	2505.13043478261	2481.32608695652	3215.0652173913	2396.39130434783	2490.08695652174	2510.52173913044	3269.04347826087	2200.5	1909.67391304348	2099.25	2408	1736.84782608696	1823	1941.84782608696	2214.82608695652	3124.11673813044	1.38264761715763e-11	down-regulated
BEST2	0	0	0	0	0.673913043478261	0	0	0	113.554347826087	6.43478260869565	3.43478260869565	0	68.7173913043478	13.4347826086957	13.9565217391304	14.695652173913	57.2173913043478	60.1304347826087	42.6086956521739	25.1847826086957	31.0869565217391	91.1630434782609	80.3478260869565	65.1956521739131	81.1521739130435	87.8586956521739	55.1195652173913	115.336956521739	114.228260869565	82.6086956521739	117.054347826087	120.782608695652	148.836956521739	40.1195652173913	186.608695652174	213.54347826087	131.782608695652	18.5869565217391	174.402173913044	198.869565217391	171.978260869565	117.608695652174	208.826086956522	176.217391304348	153.978260869565	132.652173913043	76.8693327608696	1.38264761715763e-11	up-regulated
TLCD2	252.565217391304	203.804347826087	247.934782608696	252.739130434783	240.478260869565	214.086956521739	261.152173913044	245.782608695652	298.45652173913	251.630434782609	275.630434782609	257.913043478261	278.010869565217	265.434782608696	308.510869565217	259.5	282.086956521739	230.586956521739	280	261.521739130435	207.75	302.836956521739	267.95652173913	258.891304347826	338.380434782609	351.152173913044	309	350.869565217391	313.347826086957	316.152173913044	343.891304347826	420.065217391304	451.804347826087	349.891304347826	359.119565217391	403.804347826087	365.913043478261	275.630434782609	436.260869565217	608.652173913044	583.891304347826	429.45652173913	538.152173913044	435.130434782609	525.836956521739	430.652173913044	329.180764434783	1.41723413831209e-11	up-regulated
KIF26A	73.7608695652174	90.0434782608696	90.4782608695652	97.1304347826087	87.6195652173913	88.0434782608696	106.032608695652	91.3478260869565	67.554347826087	91.5652173913043	55	64.5434782608696	63.7826086956522	73.6521739130435	89.6086956521739	69.7173913043478	59.2608695652174	81.4782608695652	71.7826086956522	54.5652173913044	90.8695652173913	67.7826086956522	60.3695652173913	66.25	60.2173913043478	73.2826086956522	56.8913043478261	48.6521739130435	42.6304347826087	51.5217391304348	44.5869565217391	54.6413043478261	67.8478260869565	50.5978260869565	59.2608695652174	45.8913043478261	43.5217391304348	72.3478260869565	41.3695652173913	28.7391304347826	34.4347826086957	27.9347826086957	28.304347826087	27.8586956521739	31.0326086956522	27.9347826086957	62.4291116304348	1.49649154930189e-11	down-regulated
AC005840.3	39.8478260869565	48.8369565217391	48.8478260869565	68.5869565217391	82.6521739130435	60.8913043478261	75.6086956521739	61.4891304347826	84.4565217391305	44.0217391304348	67.0434782608696	75.5217391304348	60.4130434782609	57.1521739130435	72.1956521739131	72.1086956521739	66.3152173913043	84.9782608695652	66.0652173913044	84.2826086956522	53.3695652173913	79.7391304347826	94.304347826087	86.054347826087	79.2391304347826	75.1956521739131	79.5652173913044	85.1304347826087	86.2173913043478	84.4782608695652	101.021739130435	86.6521739130435	79.3260869565217	95.7173913043478	70.8478260869565	89.4782608695652	116.130434782609	91.9565217391304	98.5217391304348	131.260869565217	113.369565217391	107.434782608696	133.478260869565	150.717391304348	137.521739130435	119.326086956522	83.6384704347826	1.51798959432893e-11	up-regulated
IQGAP2	714.717391304348	886.760869565218	908.195652173913	610.434782608696	795.5	869.108695652174	934.20652173913	671.217391304348	685.54347826087	830.565217391304	859.95652173913	773.913043478261	637.391304347826	892.880434782609	945.978260869565	754.304347826087	587.282608695652	1108.61956521739	1080.96739130435	918.304347826087	415.815217391304	1267.60869565217	1360.64130434783	1128.0652173913	1375.48913043478	1197.61956521739	1142.54347826087	1434.20652173913	1238.80434782609	1374.82608695652	1343.13043478261	1651.17391304348	1495.10869565217	1065.98913043478	1474	1689.19565217391	1778.25	1067.3152173913	1596.80434782609	2095.54347826087	1770.33695652174	1280.04347826087	1754.9347826087	2075.65217391304	1887.3152173913	1458.44565217391	1171.40664769565	1.62703787903227e-11	up-regulated
TOPBP1	3024.30434782609	3485.91304347826	3036.92391304348	3356.54347826087	3341	3403.78260869565	3195.73913043478	3440.58695652174	2855.76086956522	3462.79347826087	3382.33695652174	3812.63043478261	2936.05434782609	3530.30434782609	3421.47826086957	3565.76086956522	3325.32608695652	3209.40217391304	3075.15217391304	3270.84782608696	3107.21739130435	3235.78260869565	3438.89130434783	3373.48913043478	3162.69565217391	2934.30434782609	3348.04347826087	2872.75	3092.4347826087	3027.9347826087	2625.86956521739	2651.40217391304	2684.80434782609	3042.8152173913	2587.9347826087	2620.21739130435	2599.10869565217	3164.32608695652	2416.63043478261	2320.89130434783	2299.02173913044	2611.41304347826	2167.45652173913	2249	2117.91304347826	2356.54347826087	3005.25068621739	1.68746681859225e-11	down-regulated
ARSJ	316.565217391304	291.95652173913	332.586956521739	342.608695652174	288	369.380434782609	353.95652173913	351.228260869565	260.29347826087	340.771739130435	357.891304347826	334.45652173913	355.891304347826	285.70652173913	312.5	340.380434782609	325.913043478261	285.739130434783	327.978260869565	298.891304347826	334.152173913044	288.934782608696	348.923913043478	297.673913043478	256.141304347826	325.402173913044	261.934782608696	237.434782608696	295.478260869565	247.554347826087	200.913043478261	203.391304347826	187.945652173913	269.847826086957	221.630434782609	173.695652173913	181.891304347826	298.739130434783	161.304347826087	143.271739130435	144.108695652174	225.739130434783	133.478260869565	184.95652173913	160.663043478261	216.641304347826	271.185725956522	1.68746681859225e-11	down-regulated
ERGIC1	8397.4347826087	7479.86956521739	7254.02173913044	7159.5652173913	7580.15217391304	6910.17391304348	7130.10869565217	7469.36956521739	8748.63043478261	7095.80434782609	7281.19565217391	7316.17391304348	8268.5652173913	7658.95652173913	7881.82608695652	7414.63043478261	7631.30434782609	7803.15217391304	7658.95652173913	7273.15217391304	7658.95652173913	7837.04347826087	8183.56521739131	7881.82608695652	8788.15217391304	8110.69565217391	9084.17391304348	9353.97826086957	8392.0652173913	8110.69565217391	8844.30434782609	9580	8788.15217391304	7792.13043478261	9117.60869565217	10359.6413043478	9410.17391304348	8193.78260869565	10078.152173913	11228.7826086957	11310.8913043478	9241.65217391304	11516.3913043478	11472.9347826087	10977.1739130435	9084.17391304348	8517.61149152174	1.72014002612677e-11	up-regulated
CEP55	3639.10869565217	3630.69565217391	3468.10869565217	4033.94565217391	3256.02173913044	3466.26086956522	3551.41304347826	3995.5	2956.34782608696	3410.71739130435	3811.36956521739	3613.26086956522	3082.08695652174	3219.47826086957	3596.01086956522	3390.13043478261	3456.30434782609	3139.52173913044	3341.73913043478	3137.69565217391	3573.4347826087	3085.73913043478	3242.5	3129.95652173913	2907.73913043478	3054.30434782609	3089.78260869565	2787.41304347826	2962.51086956522	2946.71739130435	2663.84782608696	3094.59782608696	3009.8152173913	3374.17391304348	2791.52173913044	2826.86956521739	2814.41304347826	3346.0652173913	2458.9347826087	2553.30434782609	2586.8152173913	2841.58695652174	1956.78260869565	2523.10869565217	2453.89130434783	2486.86956521739	3125.18290641304	1.73860348975422e-11	down-regulated
STOM	5373.41304347826	5950.88043478261	6005.84782608696	6521.71739130435	5271.5652173913	6930.58695652174	6776.15217391304	6724.08695652174	32718.9130434783	9465.58695652174	10559.8695652174	10887.9347826087	28503.4130434783	18639.9782608696	22332.6086956522	18085.8913043478	27892.4565217391	22891.1739130435	28503.4130434783	23921.5434782609	20034.9565217391	29594.0869565217	27101.6086956522	32718.9130434783	35088.2173913044	33960	34346.4347826087	35639.8913043478	39030.347826087	42491.5652173913	35088.2173913044	41194.652173913	40415.152173913	23921.5434782609	37888.7173913043	33465.9130434783	41855.1739130435	17129.3695652174	44632.652173913	45552.0652173913	48188.7608695652	54109.3695652174	37050.4347826087	41855.1739130435	43905.1739130435	48188.7608695652	27574.0035963913	1.76177319156826e-11	up-regulated
POLD3	747.739130434783	804.576086956522	756.434782608696	964.608695652174	899.369565217391	928.847826086957	863.673913043478	948.141304347826	596.282608695652	909.891304347826	931.641304347826	928.586956521739	628.717391304348	914.304347826087	923.5	934.467391304348	715.239130434783	698.456521739131	733.467391304348	819	790.510869565217	684.760869565217	687.554347826087	700.358695652174	636.782608695652	622.869565217391	714.173913043478	631.619565217391	653.239130434783	650.717391304348	531.956521739131	518.239130434783	562.25	677.326086956522	487.782608695652	562.945652173913	537.630434782609	706.347826086957	539.630434782609	548.934782608696	489.565217391304	558.141304347826	464.739130434783	501.554347826087	448.869565217391	475.652173913044	696.328215	1.85355192017577e-11	down-regulated
PRSS23	10911.0434782609	11060.8913043478	10192.1739130435	10911.0434782609	11432.9565217391	11265.4347826087	10352.2391304348	11078.0652173913	9241.65217391304	11651.652173913	11449.2173913043	12907.8695652174	9338	10388.652173913	9643.4347826087	12089.097826087	11496.9130434783	9381.80434782609	8457.73913043478	10446.1304347826	12200.3695652174	8938.89130434783	9117.60869565217	10405.8913043478	8927.02173913044	8655.41304347826	9117.60869565217	8289.34782608696	8132.02173913044	8416.71739130435	7943.21739130435	7525.5652173913	7525.5652173913	8547.38043478261	7060.86956521739	6895.4347826087	6952.97826086957	9135.02173913044	7688.9347826087	6190.13043478261	6502.08695652174	7599.73913043478	6752.78260869565	7052.9347826087	6997.19565217391	7366.4347826087	9209.4167333913	1.8622453023176e-11	down-regulated
LIX1L	1506.45652173913	1509.07608695652	1548.57608695652	1672.20652173913	1492.89130434783	1615.21739130435	1488.36956521739	1675.13043478261	1724.57608695652	1275.67391304348	1453.77173913043	1570.15217391304	1882.63043478261	1528.40217391304	1442.71739130435	1700.16304347826	1876.28260869565	1548.89130434783	1627.60869565217	1901.63043478261	1583.6847826087	1767.95652173913	1745.69565217391	1904.80434782609	2051.41304347826	1823	2195.14130434783	1921.73913043478	1943.35869565217	1987.13043478261	2150.66304347826	2433.32608695652	2360.66304347826	1857.69565217391	1970.1847826087	2104.19565217391	2272.04347826087	1957.65217391304	2188.08695652174	2395.0652173913	2321.96739130435	2296.52173913044	2173.97826086957	2331.34782608696	2253.98913043478	2071.84782608696	1871.81684873913	2.00398634354657e-11	up-regulated
COPS8	4089.4347826087	3988.5652173913	3675.44565217391	3976.02173913044	3688.84782608696	4124.19565217391	3960.19565217391	3885.0652173913	6794.19565217391	4166.69565217391	3831.76086956522	3315.53260869565	5801.60869565217	4335.9347826087	4134.19565217391	3664.91304347826	5255	4655.52173913044	4127.05434782609	3805.69565217391	5100.17391304348	4841.47826086957	5336.01086956522	4157.65217391304	4960.23913043478	5506.21739130435	3998.4347826087	5465.15217391304	6043.10869565217	5777.17391304348	6060.76086956522	5600.14130434783	5822.0652173913	5713.67391304348	6110.63043478261	6115.78260869565	7224.30434782609	5140.32608695652	6945.60869565217	6458.63043478261	6910.17391304348	6707.34782608696	7060.86956521739	6731.71739130435	6861.69565217391	7543.71739130435	5205.84716823913	2.00483333871744e-11	up-regulated
UBASH3B	5740.84782608696	4791.69565217391	4689.19565217391	5084.26086956522	4863.78260869565	4412.79347826087	4651.84782608696	5245.47826086957	4232.95652173913	5470.58695652174	5295.9347826087	5356.38043478261	5302.85869565217	4256.36956521739	4161.32608695652	4905.02173913044	4358.71739130435	4210.36956521739	4689.19565217391	4686.4347826087	5014.76086956522	4038.5652173913	4849.89130434783	4702.39130434783	4239.04347826087	4256.36956521739	4447.78260869565	4148.17391304348	4273.53260869565	3777.63043478261	4029.10869565217	3555.9347826087	3202.02173913044	4216.26086956522	4131.30434782609	3630.69565217391	2951.9347826087	3998.4347826087	3079.71739130435	2627.5	2741.35869565217	3739.11956521739	2849.47826086957	2956.34782608696	2885.60869565217	3777.63043478261	4228.84028736957	2.07167867024917e-11	down-regulated
SDK1	16.695652173913	16.8695652173913	22.2826086956522	13.5217391304348	22.2826086956522	10.8478260869565	19.8695652173913	27.2391304347826	97.2608695652174	27.8695652173913	25.3695652173913	25.8913043478261	43.5652173913044	28.6086956521739	34.7391304347826	24.2826086956522	29.7173913043478	18.5	25.0326086956522	13.7391304347826	29.0217391304348	35.3260869565217	35.0869565217391	26.9347826086957	29.6304347826087	44.4130434782609	36.9021739130435	71.4347826086957	58.1956521739131	53.4782608695652	83.3152173913044	94.6521739130435	126.869565217391	55.9347826086957	122.891304347826	127.826086956522	106.619565217391	34.7173913043478	133.478260869565	164.684782608696	132.173913043478	121.79347826087	129.195652173913	129.086956521739	112.086956521739	120.282608695652	60.0047290434783	2.07452032756629e-11	up-regulated
MET	16607.0869565217	17597.0869565217	17763.152173913	18721.2826086957	19013.4565217391	16841.8695652174	17214.3260869565	19013.4565217391	14880.1956521739	18345.152173913	17269.152173913	19952.1739130435	15804.847826087	15622.5	15671.9782608696	17920.8043478261	17044.0652173913	15175.1956521739	15452.7391304348	16674.5217391304	16758.152173913	14722.9565217391	15452.7391304348	16170.5869565217	13990.6739130435	13906	13906	12441.1739130435	13387.1304347826	13769.6956521739	12907.8695652174	12641.9347826087	13125.3695652174	15854.5652173913	13387.1304347826	12810.3695652174	13052.8043478261	16758.152173913	12868.9782608696	11723.9565217391	11940.9565217391	12682.9782608696	11624.7826086957	12441.1739130435	12137.2173913044	12838.1956521739	15127.9691115435	2.07452032756629e-11	down-regulated
CILP	2.32608695652174	4.93478260869565	6	6.1304347826087	3.10869565217391	6.84782608695652	2.56521739130435	15.0217391304348	147.945652173913	16.9347826086957	8.93478260869565	11.9565217391304	94.5	50.2608695652174	60.2391304347826	45.1413043478261	128.239130434783	112.608695652174	75.0434782608696	95.8260869565217	68.6521739130435	162.217391304348	153.391304347826	144.739130434783	226.923913043478	211.065217391304	268.673913043478	213.782608695652	246.173913043478	245	272.978260869565	251.5	390.478260869565	41.2608695652174	137.5	258.380434782609	370.130434782609	35.6304347826087	429.282608695652	342.652173913044	393.804347826087	374.630434782609	417.847826086957	318.923913043478	375.717391304348	227.04347826087	162.455338304348	2.20453481422889e-11	up-regulated
PTK2	4056.23913043478	3938.30434782609	4021.19565217391	3929.64130434783	4220.13043478261	4038.5652173913	4056.23913043478	3963.4347826087	5923.15217391304	3543.86956521739	3686.73913043478	4056.23913043478	5578.15217391304	3998.4347826087	3747.65217391304	4358.71739130435	5154.65217391304	4401.0652173913	4335.9347826087	4944.26086956522	4749.95652173913	5255	4699.5652173913	5459.60869565217	5503.73913043478	5465.15217391304	5617.32608695652	5917.5652173913	5681.5652173913	5622.89130434783	6251.41304347826	6162.45652173913	6299.65217391304	5859.97826086957	6414.07608695652	6110.63043478261	6347.23913043478	5508.69565217391	6558.73913043478	6113.20652173913	6137.41304347826	5990.20652173913	6043.10869565217	6187.3152173913	5998.5652173913	6225.89130434783	5176.81687045652	2.20494307019715e-11	up-regulated
C19orf48	544.260869565217	516.652173913044	510.532608695652	443.489130434783	513.336956521739	577.130434782609	538.728260869565	412.95652173913	417.760869565217	549.706521739131	584.782608695652	524.630434782609	413.54347826087	584.29347826087	523.152173913044	529.217391304348	429.652173913044	528.934782608696	437.652173913044	475.652173913044	543.402173913044	465.79347826087	410.065217391304	437.391304347826	412.097826086957	465.5	441.04347826087	404.5	397.804347826087	383.739130434783	412.586956521739	338.782608695652	329.141304347826	352.20652173913	319.869565217391	434.45652173913	364.065217391304	363.04347826087	334.021739130435	331.576086956522	360.565217391304	279.423913043478	351.978260869565	300.152173913044	266.086956521739	225.152173913044	430.011105891304	2.20494307019715e-11	down-regulated
RFC2	1194.46739130435	1098.41304347826	1077.34782608696	996.608695652174	1184.27173913044	1105.65217391304	1074	964.489130434782	1110.58695652174	1147.95652173913	1210.23913043478	1111.34782608696	1042.3152173913	1133.33695652174	1058.71739130435	1110.34782608696	1173.5652173913	1263.53260869565	1026.28260869565	1070.65217391304	1395.4347826087	1140.10869565217	979.076086956522	990.760869565217	927.945652173913	948.141304347826	1136.47826086957	1045.48913043478	1003.48913043478	859.673913043478	934.760869565218	814.630434782609	864.195652173913	879.45652173913	922.217391304348	875.369565217391	777.554347826087	887.467391304348	717.260869565217	645.04347826087	697.478260869565	764.260869565217	646.086956521739	632.434782608696	578.141304347826	639.717391304348	975.147932043478	2.42453508813414e-11	down-regulated
DOCK4	2891.30434782609	1927.73913043478	2152.63043478261	2469.19565217391	2510.52173913044	1778.25	2027.9347826087	2672.21739130435	3775.32608695652	2552.14130434783	2627.5	2833.13043478261	3744.69565217391	1884.97826086957	2226.03260869565	2499.47826086957	2721.58695652174	2587.9347826087	2808.39130434783	2864.69565217391	2596.35869565217	2797.95652173913	2884.33695652174	3309.89130434783	3235.02173913044	3005.5	3688.84782608696	3291.91304347826	3416.69565217391	3546.61956521739	3631.92391304348	3667.02173913044	3660.5	4043.09782608696	4495.23913043478	3576.36956521739	3461.23913043478	3437.39130434783	4154.41304347826	3963.4347826087	3890.10869565217	4493.6847826087	4374.54347826087	4039.88043478261	4059.08695652174	4928.76086956522	3200.12003213043	2.4734490994161e-11	up-regulated
ERCC6L	1379.97826086957	1451.17391304348	1395.83695652174	1684.92391304348	1422.32608695652	1360.82608695652	1425.29347826087	1635.11956521739	1179.16304347826	1497.34782608696	1543.47826086957	1728.3152173913	1469.08695652174	1618.9347826087	1722.04347826087	1725.29347826087	1621.86956521739	1576.21739130435	1611.09782608696	1564.10869565217	1626.08695652174	1359.10869565217	1389.26086956522	1529.95652173913	1227.28260869565	1321.23913043478	1360.20652173913	1126.67391304348	1206.23913043478	1180.51086956522	1077	984.956521739131	1047.19565217391	1422.32608695652	1024.33695652174	987.347826086956	994.456521739131	1419.71739130435	880.021739130435	993.315217391304	889.54347826087	1038.90217391304	736.29347826087	720.130434782609	652.521739130435	814.95652173913	1296.13089154348	2.60359757628136e-11	down-regulated
GMPR	5.93478260869565	4.93478260869565	3.34782608695652	2.3695652173913	5.89130434782609	3	4.65217391304348	2.02173913043478	43.054347826087	14.4782608695652	3.43478260869565	8.94565217391304	42.2391304347826	15.8913043478261	10.1521739130435	9.8695652173913	33.2608695652174	24.7391304347826	19.2608695652174	15.9565217391304	28.0869565217391	56.2717391304348	53.8478260869565	23.1086956521739	25.8695652173913	58.3695652173913	43.5	55.0108695652174	36.1521739130435	46.4130434782609	35.4456521739131	60.2173913043478	49.3695652173913	48.6630434782609	46.7173913043478	54.5652173913044	54.6739130434783	30.6739130434783	60.9782608695652	53.8695652173913	59.1086956521739	32	67.0652173913044	74.1304347826087	65.9347826086957	66.9130434782609	33.9215501956522	2.60359757628136e-11	up-regulated
DOCK9	1776.10869565217	1759.63043478261	2052.08695652174	2043.95652173913	2186.6847826087	1662.20652173913	1809.09782608696	2260.84782608696	2131.30434782609	1877.52173913043	2038.33695652174	2160.4347826087	2010.38043478261	1828.30434782609	1891.46739130435	1999.97826086957	1961.15217391304	2034.82608695652	2316.02173913044	2327.07608695652	1854.83695652174	2117.91304347826	2159.21739130435	2274.02173913044	2094.08695652174	2134.25	2541.0652173913	2183.15217391304	2160.0652173913	2137.71739130435	2427.55434782609	2547.97826086957	2573.09782608696	2396.80434782609	2492.01086956522	2573.09782608696	2511.54347826087	2182.39130434783	2458.9347826087	3041.97826086957	2531.30434782609	2704.5652173913	2633.0652173913	2979.39130434783	2927.78260869565	2739.02173913044	2250.09286484783	2.60359757628136e-11	up-regulated
ACSL4	4518.4347826087	4067.30434782609	4184.69565217391	4532.08695652174	4447.78260869565	4142.89130434783	4320.5	4780.04347826087	4405.71739130435	4285.36956521739	4288.22826086957	4256.36956521739	4427.34782608696	3675.44565217391	3732.89130434783	4314.69565217391	4559.47826086957	4038.5652173913	4008.97826086957	4476.89130434783	4145.17391304348	4302.10869565217	4168.32608695652	4544.63043478261	4476.89130434783	4442.59782608696	5108.32608695652	4565	4686.4347826087	5087.86956521739	5483.45652173913	5399.96739130435	5413.21739130435	5529.97826086957	5280.98913043478	4968.04347826087	5005.38043478261	5622.89130434783	5655.60869565217	5362.76086956522	5310.82608695652	6891.14130434783	5740.84782608696	6132.0652173913	6026.89130434783	6628.26086956522	4813.98701036957	2.75397320647272e-11	up-regulated
FAM161A	670.25	684.826086956522	708.782608695652	681.891304347826	605.978260869565	644.956521739131	663.521739130435	647.695652173913	606.260869565218	722.5	669.032608695652	676.771739130435	594.152173913044	739.782608695652	674.934782608696	683.021739130435	677.695652173913	719.347826086957	627.304347826087	765.413043478261	657.217391304348	754.217391304348	697.913043478261	688.467391304348	647.326086956522	512.271739130435	676.5	574.195652173913	565.771739130435	643.771739130435	448.086956521739	445.086956521739	520.826086956522	557.739130434783	503.130434782609	441.923913043478	482.673913043478	597.521739130435	384.847826086957	393.532608695652	389.684782608696	466.445652173913	354.54347826087	380.684782608696	425.260869565217	439.934782608696	589.428163065217	2.78279888386928e-11	down-regulated
MTCL1	1756.08695652174	1622.11956521739	1936.32608695652	1890.5	1899.10869565217	1768.95652173913	1869.6847826087	1867.32608695652	1369.25	1923.65217391304	1908.25	1992.19565217391	1541.32608695652	1903.55434782609	1962.55434782609	1947.36956521739	1695.67391304348	1858.48913043478	1988.82608695652	2045.05434782609	2005.28260869565	1600.91304347826	1623.84782608696	1736.5652173913	1469.95652173913	1464.41304347826	1523.03260869565	1300.36956521739	1328.28260869565	1495.10869565217	1156.04347826087	1142	1152.5652173913	1475.86956521739	1010.28260869565	1169.0652173913	1046.30434782609	1674.19565217391	1000.09782608696	967.847826086957	1091.91304347826	1174.27173913043	1009.0652173913	1004.21739130435	1101.23913043478	1196.23913043478	1536.20203723913	2.81613039302351e-11	down-regulated
MAP2	61.5	116.304347826087	135.739130434783	83.5434782608696	90.7391304347826	111.217391304348	110.04347826087	86.804347826087	224.054347826087	87.1521739130435	100.065217391304	99.0869565217391	149.934782608696	96.2608695652174	93.4782608695652	103.717391304348	164.521739130435	110.521739130435	116.413043478261	133.434782608696	124.880434782609	184.641304347826	126.934782608696	131.130434782609	186.760869565217	188.04347826087	187.282608695652	185.478260869565	215.478260869565	178.021739130435	233.217391304348	269.847826086957	338.152173913044	190.391304347826	213.858695652174	240.021739130435	342.239130434783	184.271739130435	270.369565217391	394.608695652174	350.239130434783	249.913043478261	259.391304347826	343.847826086957	403.054347826087	217.586956521739	184.439033282609	2.89383801053385e-11	up-regulated
HPGD	5066.5	5214.30434782609	4513.02173913044	4006.76086956522	4073.55434782609	5032.63043478261	4569.63043478261	4119.67391304348	6080.45652173913	5426.91304347826	4841.47826086957	5658.61956521739	5885.34782608696	5557.08695652174	4475.35869565217	6266.95652173913	5644.08695652174	5812.08695652174	5118.19565217391	6945.60869565217	5046.9347826087	7181.45652173913	6196.13043478261	7622.95652173913	7406.36956521739	6246.78260869565	6502.08695652174	7622.95652173913	7316.17391304348	8203.28260869565	6797.39130434783	8402.80434782609	7848.34782608696	7561.91304347826	7697	7190.04347826087	7770.58695652174	6475.13043478261	7678.84782608696	7828.30434782609	7525.5652173913	6810.65217391304	7349.26086956522	10158.8260869565	8539.60869565217	8694	6477.86272882609	2.94564968923423e-11	up-regulated
POLA1	2200.11956521739	2244.5	2262.36956521739	2485.56521739131	2302.86956521739	2226.5	2220.33695652174	2420.5	2002.21739130435	2163.04347826087	2375.22826086957	2281.51086956522	2133.82608695652	2419.45652173913	2763.41304347826	2295.67391304348	2212	2281.10869565217	2673.19565217391	2256.84782608696	2243.65217391304	2232.39130434783	2296.09782608696	2140.26086956522	2062.10869565217	2293.3152173913	2119.76086956522	1896.38043478261	1970.5	2194.34782608696	1692.44565217391	1677.86956521739	1768.26086956522	2222.5652173913	1703.59782608696	1505.02173913043	1692.44565217391	2121.30434782609	1491.08695652174	1508.89130434783	1516.51086956522	1765.55434782609	1163.13043478261	1097.82608695652	1402.34782608696	1579.22826086957	2034.28662854348	2.94564968923423e-11	down-regulated
ETNK2	56.8478260869565	68.9565217391304	60.9565217391304	69.4347826086957	66.1956521739131	75.8152173913044	54.804347826087	62.2826086956522	632.010869565217	92.8478260869565	75.9565217391304	112.163043478261	467.195652173913	228.391304347826	203.978260869565	253.217391304348	500.434782608696	370.95652173913	316.282608695652	441.195652173913	330.25	550.326086956522	452.79347826087	532.695652173913	609.086956521739	569.902173913044	557.739130434783	780.608695652174	615.282608695652	540.597826086957	761.576086956522	747.326086956522	868.902173913044	233.163043478261	843.804347826087	907.108695652174	965.521739130435	125.326086956522	957.532608695652	1005.27173913043	1004.97826086957	742.467391304348	1000.60869565217	903.782608695652	897.989130434783	702.782608695652	487.33365476087	3.28433319265118e-11	up-regulated
SYNC	836.554347826087	833.630434782609	828.369565217391	860.608695652174	857.119565217391	906.815217391304	743.315217391304	820.489130434783	900.619565217391	683.467391304348	664.891304347826	864.195652173913	979.413043478261	641.173913043478	753.195652173913	752.097826086957	903.782608695652	684.760869565217	811.239130434783	930.130434782609	785.391304347826	961.543478260869	871.217391304348	1099.09782608696	1100.38043478261	986.04347826087	1278.26086956522	1177.9347826087	1136.78260869565	1221.8152173913	1127.22826086957	1230.26086956522	1259.05434782609	1134.41304347826	1315.39130434783	1052.82608695652	1187.08695652174	1253.32608695652	1315.97826086957	1177.73913043478	1141.19565217391	1304.32608695652	1067.47826086957	1326.78260869565	1472.89130434783	1574.41304347826	1017.71146743478	3.35451013568204e-11	up-regulated
RHCG	66.0434782608696	63.7826086956522	60.9565217391304	62.9130434782609	65.304347826087	70.7173913043478	78.0869565217391	67.2065217391304	153.978260869565	85.9673913043478	124.565217391304	98.0978260869565	116.5	152.195652173913	169.152173913043	138.413043478261	161.391304347826	146.217391304348	139.086956521739	137.326086956522	118.673913043478	155.282608695652	155.445652173913	152.021739130435	213.065217391304	226.608695652174	176	256.826086956522	242	191.836956521739	228.239130434783	246.326086956522	298.978260869565	148.532608695652	104.869565217391	276.630434782609	306.586956521739	152.29347826087	493.565217391304	517.347826086957	421.5	268.413043478261	550.847826086957	445.021739130435	397.065217391304	227.04347826087	198.454864804348	3.40386401634684e-11	up-regulated
MANBA	592.065217391304	648.5	630.130434782609	563.630434782609	604.869565217391	620.282608695652	607.45652173913	551.891304347826	864.760869565218	674.652173913044	520.108695652174	467.630434782609	798.54347826087	671.152173913044	635.913043478261	561.826086956522	671.152173913044	782.826086956522	664.260869565218	625.282608695652	599.956521739131	842	781.423913043478	599.804347826087	758.739130434783	726.315217391304	573.217391304348	810	655.913043478261	723.358695652174	859.869565217391	1006	1022.23913043478	821.108695652174	1202.64130434783	1062.47826086957	1043.19565217391	664.978260869565	1016.63043478261	1111.92391304348	1052.52173913043	948.391304347826	1167.13043478261	1215.05434782609	1137.78260869565	1057.5652173913	787.329857804348	3.41344909264876e-11	up-regulated
DCN	0	0	1.56521739130435	0.0869565217391304	0	0	0	0	4.43478260869565	0	3.43478260869565	0	2.3695652173913	4.6304347826087	6.1304347826087	2.84782608695652	8.10869565217391	1.06521739130435	4.17391304347826	7.77173913043478	7.52173913043478	5.95652173913044	4.32608695652174	6.80434782608696	8.28260869565217	0	7.02173913043478	7	6.26086956521739	11.304347826087	10.3478260869565	6.97826086956522	8.97826086956522	9.02173913043478	2.15217391304348	6.06521739130435	11.1847826086957	5.65217391304348	18.195652173913	18.1304347826087	9.76086956521739	16.804347826087	18.195652173913	11.1304347826087	12.8260869565217	20.5652173913043	6.45841201130435	3.56416284344098e-11	up-regulated
FIGNL1	1522.78260869565	1597.08695652174	1522.4347826087	1853.19565217391	1579.47826086957	1689.46739130435	1522.16304347826	1728.3152173913	1436.17391304348	1583.45652173913	1777.19565217391	1774.97826086957	1535.89130434783	1766.20652173913	1770.60869565217	1766.97826086957	1628.30434782609	1523.94565217391	1722.4347826087	1634.44565217391	1542.32608695652	1482.64130434783	1555.26086956522	1514.45652173913	1436.40217391304	1375.73913043478	1398.9347826087	1309.73913043478	1503.01086956522	1673.46739130435	1128.88043478261	1163.51086956522	1119.85869565217	1636.71739130435	1164	1105.5652173913	1164.85869565217	1688.63043478261	985.20652173913	1024.5	939.173913043478	1139.76086956522	886.25	877.934782608696	859.673913043478	1080.96739130435	1428.10892528261	3.81555221955271e-11	down-regulated
CPS1	2281.91304347826	3005.5	2957.17391304348	2962.51086956522	3204.28260869565	3358.39130434783	2637.8152173913	3101.71739130435	3260.76086956522	2926.35869565217	3005.5	2995.19565217391	2441.77173913044	3492.71739130435	3347.05434782609	3345.17391304348	2923.02173913044	3426.36956521739	3156.34782608696	3447.3152173913	2324.26086956522	3341.73913043478	3578.84782608696	3681.15217391304	4205.02173913044	3896.38043478261	4518.4347826087	4156.03260869565	3880	4053.15217391304	4394.5	4981.03260869565	4941.17391304348	3134.4347826087	3254.65217391304	4889.36956521739	4473.82608695652	3759.30434782609	5177.76086956522	5511.13043478261	4698.01086956522	5240.95652173913	5497.64130434783	5245.47826086957	4948.15217391304	4419.4347826087	3771.27764369565	3.83879220442121e-11	up-regulated
TUBGCP3	900.45652173913	1001.8152173913	924.597826086957	909.891304347826	917.826086956522	970.021739130435	964.608695652174	971.826086956522	1010.64130434783	992.54347826087	880.326086956522	958.5	873.641304347826	930.130434782609	899.369565217391	870.673913043478	878.54347826087	869.108695652174	808.086956521739	835.021739130435	903.369565217391	849.989130434783	901.097826086957	833.695652173913	857.119565217391	908.326086956522	820.326086956522	853.521739130435	869.434782608696	888.673913043478	830.456521739131	765.5	812.576086956522	814.173913043478	805.130434782609	893.326086956522	874.673913043478	846.065217391304	727.782608695652	715.119565217391	766.673913043478	810	722.032608695652	764.967391304348	714.717391304348	743	862.160442608696	3.83879220442121e-11	down-regulated
HSPA12A	991.673913043478	948.141304347826	1122.10869565217	1025.67391304348	1010.78260869565	963.032608695652	1016.1847826087	1009.41304347826	656.652173913044	906.097826086956	951.652173913044	951.95652173913	857.119565217391	836.076086956522	896.086956521739	915.79347826087	843.5	813.923913043478	819.826086956522	856.04347826087	894.521739130435	775.29347826087	778.076086956522	799.934782608696	672.608695652174	678.434782608696	638.391304347826	619.413043478261	734.608695652174	615.945652173913	573.79347826087	626.108695652174	611.076086956522	918.478260869565	808.619565217391	593.445652173913	591.065217391304	824.869565217391	546.239130434783	515.673913043478	630.478260869565	567.108695652174	515.815217391304	538.152173913044	553.782608695652	638.130434782609	775.039235086957	4.00519156502736e-11	down-regulated
C3	1295.08695652174	1324.0652173913	1699.02173913043	1193.60869565217	1490.4347826087	1295.85869565217	1913.30434782609	1184.60869565217	3457.09782608696	1306.28260869565	1313.91304347826	1267.89130434783	2635.54347826087	1718.02173913044	1868.17391304348	1472.89130434783	2114.86956521739	2041.95652173913	1751.21739130435	1475.10869565217	1916.08695652174	2102.39130434783	2043.95652173913	1759.39130434783	2270.73913043478	2793.23913043478	1962.34782608696	2750.95652173913	2662.08695652174	2393.26086956522	3582.89130434783	3574.73913043478	4905.02173913044	1997.6847826087	3520.71739130435	5286.5	5862.41304347826	2180.52173913044	5789.91304347826	6702.13043478261	6739.13043478261	3634.80434782609	7622.95652173913	6282.58695652174	7130.10869565217	3787.58695652174	2936.37217297826	4.32545073322346e-11	up-regulated
CXCL16	300.260869565217	289.29347826087	278.695652173913	314.163043478261	260.413043478261	313.347826086957	287.782608695652	301.065217391304	200.913043478261	296.978260869565	331.260869565217	272.95652173913	226.869565217391	253.586956521739	282.684782608696	222.445652173913	252.152173913043	237.347826086957	258.173913043478	229.945652173913	244.021739130435	240.978260869565	282.086956521739	240.826086956522	234.326086956522	272.054347826087	253.152173913044	199.173913043478	219.228260869565	199.597826086957	234.391304347826	196.782608695652	227.565217391304	250.434782608696	194.076086956522	197.304347826087	202.434782608696	254.728260869565	148.70652173913	198.065217391304	194.782608695652	164.086956521739	136.04347826087	158.217391304348	180.29347826087	156.423913043478	236.741731130435	4.65509884782035e-11	down-regulated
CALCOCO2	3094.02173913044	3112.02173913044	3329.39130434783	3658.45652173913	2790.36956521739	3226.98913043478	3352.17391304348	3830.48913043478	4112.82608695652	2656.97826086957	3267.90217391304	2842.86956521739	3903	3802.73913043478	4576.58695652174	3100.9347826087	3341	3935.04347826087	4628.15217391304	2992.67391304348	3214.27173913044	3915.41304347826	3736.55434782609	3330.84782608696	3880	3762.46739130435	3424.32608695652	4374.54347826087	4220.13043478261	4117.60869565217	5089.94565217391	5305.15217391304	5167.52173913044	4506.4347826087	5870.83695652174	5636.40217391304	6360.28260869565	3855.54347826087	6407.47826086957	7730.15217391304	7561.91304347826	5397.91304347826	6383.69565217391	6251.41304347826	6110.63043478261	5551.0652173913	4363.41658123913	4.71447136958775e-11	up-regulated
FGB	444.076086956522	860.608695652174	704.29347826087	672.956521739131	737.684782608696	1009.60869565217	719.347826086957	621.79347826087	805.130434782609	655.5	916.152173913044	970.173913043478	635.619565217391	932.717391304348	1120.0652173913	1059.91304347826	776.326086956522	863.195652173913	857.434782608696	978.467391304348	605.021739130435	801.891304347826	1096.97826086957	1099.09782608696	1239.35869565217	1576.97826086957	1359.10869565217	1357.45652173913	1553.66304347826	1444.19565217391	1186.44565217391	1325.4347826087	1571	912.652173913044	661.5	1440.02173913043	1721.65217391304	1163.51086956522	1811.20652173913	2149.54347826087	2091.59782608696	1908.25	2087.08695652174	2089.5	2145.26086956522	1455.29347826087	1178.14722676087	4.86769798819707e-11	up-regulated
UBAP1	917.434782608696	908.065217391304	794.717391304348	710.913043478261	827.565217391304	757.5	819.934782608696	778.304347826087	1041.41304347826	850.934782608696	837.608695652174	868.260869565217	1048.64130434783	840.021739130435	902.108695652174	770.95652173913	933.717391304348	883.260869565218	853.782608695652	878.706521739131	914.652173913043	981.739130434783	1062.89130434783	914.108695652174	1076.35869565217	1105.73913043478	1001.11956521739	1110.94565217391	1136.78260869565	1007.69565217391	1298.22826086957	1258.6847826087	1263.36956521739	969.086956521739	1252.5	1409.89130434783	1315.97826086957	921.652173913044	1355.25	1400.95652173913	1418.1847826087	1039.47826086957	1380.5	1381.5652173913	1272.5	1141.84782608696	1035.12075473913	4.88799484970059e-11	up-regulated
RELT	133.239130434783	131.260869565217	113.119565217391	109.760869565217	102.217391304348	96.5978260869565	115.934782608696	100.065217391304	123.739130434783	109.304347826087	102.54347826087	117.608695652174	114.282608695652	99.9565217391304	100.076086956522	105.804347826087	106.565217391304	84.9782608695652	72.804347826087	106.913043478261	136.04347826087	87.2826086956522	94.304347826087	82.5652173913043	73.0652173913044	109.391304347826	86.9565217391305	95.6086956521739	114.228260869565	92.0652173913044	74.1630434782609	79.7391304347826	66.1956521739131	92.4565217391304	63.4347826086957	82.7608695652174	75.9347826086957	88.6086956521739	63.7826086956522	58.1195652173913	57.0217391304348	57.2608695652174	54.1304347826087	41.8695652173913	51.5326086956522	53.4347826086957	90.8419184130435	5.00154805118561e-11	down-regulated
CNST	940.434782608696	799.934782608696	887.630434782609	981.739130434783	857.978260869565	845.20652173913	873.130434782609	1059.21739130435	1446.27173913044	926.782608695652	922.891304347826	978.04347826087	1266.34782608696	938.163043478261	977.510869565217	1015.25	1176.70652173913	1017.4347826087	1228.9347826087	1124.69565217391	948.54347826087	1332.21739130435	1303.70652173913	1351.19565217391	1394.65217391304	1282.65217391304	1410.41304347826	1433.17391304348	1416.13043478261	1576.76086956522	1515.47826086957	1416.5	1449.47826086957	1201.01086956522	1642.36956521739	1430.71739130435	1425.45652173913	993.923913043478	1621.36956521739	1613.5652173913	1498.91304347826	1578.77173913043	1672.83695652174	1595.57608695652	1503.01086956522	1710.55434782609	1251.81049693478	5.1557785691227e-11	up-regulated
STK32B	301.402173913044	418.836956521739	430.717391304348	503.695652173913	336.54347826087	429.5	404.5	520.260869565217	241.771739130435	391.836956521739	442.934782608696	469.75	300.467391304348	487.891304347826	462.913043478261	502.445652173913	400.108695652174	314.163043478261	484.978260869565	391.239130434783	400.239130434783	322.934782608696	368.195652173913	426.04347826087	306.478260869565	361.130434782609	367.239130434783	241.163043478261	285.934782608696	324.076086956522	162.934782608696	232.25	254.869565217391	305.195652173913	165.065217391304	152.673913043478	178.847826086957	332.630434782609	159.869565217391	138.021739130435	155.369565217391	191.902173913044	88.6956521739131	138.434782608696	124.695652173913	166.347826086957	317.112951173913	5.19480494061056e-11	down-regulated
KRT6A	5	2.02173913043478	2.39130434782609	2.89130434782609	2.19565217391304	5.91304347826087	4.65217391304348	2.91304347826087	145.70652173913	6.43478260869565	15.6521739130435	11.0434782608696	136.54347826087	21.5652173913043	25.2173913043478	18.6630434782609	63.4782608695652	26.1304347826087	47.1304347826087	43.0652173913044	49.0652173913044	37.9347826086957	113.478260869565	77.8478260869565	72.0326086956522	198.652173913043	148.673913043478	128.95652173913	254.554347826087	202.804347826087	211.521739130435	113.326086956522	151.489130434783	71.0326086956522	212.478260869565	140.391304347826	177.934782608696	57.1739130434783	301.630434782609	151.391304347826	179.782608695652	346.119565217391	373.04347826087	182.978260869565	301.630434782609	421.5	114.478968282609	5.24419336995189e-11	up-regulated
AKAP10	1960.71739130435	1924.61956521739	1931.29347826087	1959.3152173913	1841.17391304348	1871.53260869565	1839.26086956522	2027.58695652174	2271.59782608696	1863.60869565217	1875.89130434783	2034.48913043478	2299.51086956522	1998.47826086957	1755.45652173913	2250.78260869565	2228.19565217391	2070.39130434783	1949.03260869565	2384.86956521739	2002.21739130435	2380.26086956522	2389.39130434783	2458.47826086957	2583.08695652174	2299.02173913044	2542.70652173913	2477.97826086957	2361.15217391304	2519.20652173913	2374.45652173913	2662.71739130435	2610.98913043478	2690.54347826087	2627.5	2400.80434782609	2554.82608695652	2376.58695652174	2373.57608695652	2319.34782608696	2574.76086956522	2757.39130434783	2526.78260869565	2931.21739130435	2752.96739130435	2927.13043478261	2300.28048017391	5.24419336995189e-11	up-regulated
MYO5B	198.804347826087	195.010869565217	191.380434782609	202.565217391304	168.163043478261	149.782608695652	214.782608695652	212.79347826087	87.7608695652174	200.717391304348	208.586956521739	192.347826086957	122.434782608696	159.521739130435	161.95652173913	160.347826086957	148.380434782609	105.478260869565	132.304347826087	136.108695652174	167.141304347826	122.75	130.934782608696	127.097826086957	67.8152173913044	100.54347826087	104.45652173913	76.8260869565217	133.45652173913	87.1521739130435	65.9347826086957	54.6413043478261	81.7065217391304	111.304347826087	70.8478260869565	54.5652173913044	81.5869565217391	137.380434782609	46.4239130434783	52.0217391304348	77.4673913043478	81.3804347826087	62.8478260869565	52.4782608695652	60.2717391304348	78.7391304347826	122.543475478261	5.25211751213929e-11	down-regulated
ROCK1	4171.4347826087	4187.5652173913	4401.0652173913	4634.86956521739	4759.80434782609	4453.52173913044	4307.32608695652	4644.91304347826	5681.5652173913	4358.71739130435	4144.03260869565	3897.67391304348	5927.26086956522	4820.41304347826	4795.08695652174	3989.82608695652	5120.36956521739	5149.67391304348	5395.91304347826	4673.47826086957	4849.89130434783	5448.28260869565	5079.41304347826	4768.80434782609	5638.60869565217	5421.58695652174	5075.60869565217	5785.58695652174	5310.82608695652	5570.05434782609	5857.54347826087	5756.32608695652	5953.04347826087	5789.91304347826	6219.23913043478	5801.60869565217	5953.04347826087	5613.02173913044	5917.5652173913	6784.10869565217	6132.0652173913	6791	6776.15217391304	5388.30434782609	6003.19565217391	6724.08695652174	5302.68243193478	5.25314136095496e-11	up-regulated
GINS3	703.054347826087	761.521739130435	625.826086956522	673.478260869565	636.869565217391	667.630434782609	641.608695652174	733.467391304348	661.032608695652	770.576086956522	806.173913043478	775.586956521739	661.597826086957	778.076086956522	674.934782608696	719.097826086957	772.369565217391	730.413043478261	645.706521739131	689.434782608696	810.695652173913	730.826086956522	774	682.673913043478	611.652173913044	684.54347826087	643.934782608696	630.315217391304	551.739130434783	608.021739130435	537.630434782609	535.934782608696	545.934782608696	601.04347826087	512.097826086957	616.086956521739	525.434782608696	629.065217391304	491.163043478261	456.5	453.913043478261	443.565217391304	403.913043478261	444.369565217391	348.054347826087	449.434782608696	627.19565076087	5.42235146430064e-11	down-regulated
CHP1	7730.15217391304	7828.30434782609	7387.10869565218	5993.06521739131	7045.34782608696	7172.63043478261	7240.30434782609	5958.4347826087	6110.63043478261	6423.36956521739	6787.55434782609	5607.65217391304	6838.9347826087	7569.26086956522	7730.15217391304	5857.54347826087	6487.9347826087	7510.17391304348	7760.34782608696	6129.34782608696	6225.89130434783	7987	8084.02173913044	6547.11956521739	8589.05434782609	8036.4347826087	7491.26086956522	9186.13043478261	8524.04347826087	8259.5652173913	8694	9957.36956521739	9518.58695652174	7525.5652173913	9663	9744.41304347826	9509.54347826087	7903.30434782609	9034.36956521739	11432.9565217391	10808.1739130435	8944.6847826087	10977.1739130435	10282.7391304348	10850.5652173913	9533.28260869565	8053.88043671739	5.63864359845251e-11	up-regulated
CYB5A	2535.77173913044	2580.20652173913	2267.98913043478	1930.66304347826	2266.05434782609	2586.8152173913	2289.15217391304	1884.72826086957	2053.27173913044	2053.92391304348	2118.42391304348	2027.33695652174	2039.67391304348	2211.52173913044	1984.17391304348	2128.38043478261	2093.15217391304	2383.86956521739	1926.30434782609	2379.17391304348	1992.95652173913	2324.59782608696	2425.82608695652	2383.86956521739	2596.35869565217	2500.5652173913	2463.73913043478	2826.26086956522	2739.02173913044	2746.13043478261	2800.28260869565	2879.41304347826	2802.78260869565	2568.45652173913	2689.9347826087	3438.89130434783	3415.84782608696	2644.30434782609	3549.28260869565	3563.80434782609	3374.17391304348	2666.41304347826	3402.90217391304	4453.52173913044	4171.4347826087	3172.11956521739	2615.94515878261	5.70711791702038e-11	up-regulated
HPCAL1	1414.35869565217	1026.45652173913	1126.25	876.065217391304	1146.36956521739	924.45652173913	1309	904.967391304348	2842.86956521739	1082.5652173913	1046.30434782609	1048.21739130435	2665.17391304348	1607.96739130435	1448.90217391304	1476.72826086957	2199.73913043478	2079.90217391304	1857.02173913044	1662.52173913043	2111.10869565217	2349.65217391304	2025.17391304348	2178.5652173913	2560.52173913044	2586.26086956522	2564.8152173913	3086.58695652174	2761.20652173913	2405.33695652174	3526.54347826087	3512.4347826087	3593.92391304348	1929.97826086957	3824.41304347826	3782.76086956522	3395.79347826087	1524.95652173913	3538.70652173913	3716.86956521739	3660.5	3133.08695652174	4011.13043478261	3078.02173913044	3430.45652173913	3142.84782608696	2329.94544102174	5.70711791702038e-11	up-regulated
NUF2	1203.15217391304	1185.23913043478	1166.0652173913	1281.76086956522	1218.52173913043	1242.13043478261	1140.28260869565	1311.13043478261	1163.73913043478	1283.02173913043	1215.52173913044	1273.08695652174	1125.65217391304	1212.38043478261	1041.97826086957	1285.25	1248.27173913043	1139.58695652174	1011.73913043478	1266.98913043478	1227.28260869565	1011.26086956522	1084.3152173913	1179.60869565217	1086.17391304348	1133.15217391304	1178.79347826087	1038.80434782609	925.152173913044	1036.58695652174	997.945652173913	926.04347826087	991.336956521739	1084.08695652174	758.739130434783	826.673913043478	964.228260869565	1229.52173913043	879.217391304348	780.695652173913	875.641304347826	974.934782608696	717.804347826087	913.54347826087	777.554347826087	803.336956521739	1074.30293076087	5.70711791702038e-11	down-regulated
DDX11	491.978260869565	468.45652173913	488.619565217391	459.989130434783	420.304347826087	457.130434782609	513.141304347826	465.608695652174	420.402173913044	516.326086956522	550.130434782609	390.239130434783	421.989130434783	482.423913043478	455.630434782609	486.5	370.891304347826	465.673913043478	442.239130434783	425.565217391304	415.815217391304	449.521739130435	392.782608695652	384.891304347826	406.663043478261	383.847826086957	417.847826086957	458.717391304348	376.304347826087	386.510869565217	390.413043478261	393.239130434783	307.021739130435	358.260869565217	316.836956521739	410.717391304348	380.760869565217	397.336956521739	301.630434782609	360.108695652174	327.739130434783	285.45652173913	333.489130434783	311.184782608696	297.217391304348	295.228260869565	407.234402934783	5.75103346225827e-11	down-regulated
RALGAPB	2813.72826086957	2767.51086956522	3135.80434782609	3469.91304347826	3458.77173913044	3143.71739130435	2829	3433.32608695652	3067.5	2999.53260869565	2842.22826086957	3128.15217391304	3036.23913043478	2989.76086956522	3024.30434782609	3174.63043478261	2972.47826086957	3171.39130434783	3398.15217391304	3298.11956521739	2603.91304347826	3374.17391304348	3359.34782608696	3359.34782608696	3467.1847826087	3313.0652173913	3394.97826086957	3231.69565217391	3492.71739130435	3438.89130434783	3731.10869565217	3973.54347826087	3900.58695652174	3554.90217391304	3790.04347826087	3836.63043478261	3885.0652173913	3660.5	3802.73913043478	4243.95652173913	3878.73913043478	4080.54347826087	3868.01086956522	3852.91304347826	4112.82608695652	4007.86956521739	3421.07725232609	6.4437476071672e-11	up-regulated
KCNB1	22.9565217391304	15.9782608695652	45.6086956521739	32.054347826087	35.3586956521739	28.8695652173913	23.8913043478261	49.3913043478261	579.826086956522	27.8695652173913	39.2173913043478	22.804347826087	443.630434782609	89.7173913043478	77.0978260869565	84.4782608695652	422.04347826087	165.45652173913	246.934782608696	195.195652173913	193.065217391304	370.891304347826	273.45652173913	343.847826086957	580.217391304348	525.347826086957	611.934782608696	621.913043478261	548.934782608696	584.413043478261	726.989130434783	757	982.5	266.141304347826	691.108695652174	601.934782608696	746.260869565218	141.847826086957	812.434782608696	810.913043478261	775.152173913044	1101.85869565217	677.326086956522	594.478260869565	924.086956521739	945.510869565217	409.9553425	6.4437476071672e-11	up-regulated
CLASP1	3189.08695652174	3452.5652173913	3845.45652173913	4284.21739130435	3988.5652173913	3572.13043478261	3578.84782608696	3839.36956521739	4473.82608695652	3140.35869565217	2886.19565217391	3587.04347826087	5175.41304347826	4122.60869565217	4428.60869565217	3830.48913043478	4131.30434782609	4199.02173913044	5214.30434782609	3802.73913043478	3320.26086956522	4727.84782608696	4053.15217391304	4179.17391304348	4678.21739130435	4875.4347826087	3976.02173913044	4657.59782608696	4924.67391304348	5430.78260869565	4973.88043478261	5368.45652173913	5319.26086956522	5745.0652173913	6273.86956521739	5527.36956521739	5749.91304347826	4748.73913043478	6309.60869565217	7037.41304347826	6709.90217391304	5508.69565217391	7005.73913043478	5170.34782608696	5638.60869565217	6003.19565217391	4709.89957278261	6.47277492597954e-11	up-regulated
CPB2	1.56521739130435	2.02173913043478	2.39130434782609	0.0869565217391304	1.34782608695652	3.91304347826087	2.56521739130435	0	2.95652173913043	2.43478260869565	1.06521739130435	0.956521739130435	0	1.06521739130435	0	2.84782608695652	3.04347826086957	5.89130434782609	8.80434782608696	2.80434782608696	5.23913043478261	9.97826086956522	6.69565217391304	13.4891304347826	11.2826086956522	5.31521739130435	6.06521739130435	13.1739130434783	14.8369565217391	20.1086956521739	19.8913043478261	14.8478260869565	34.3260869565217	9.97826086956522	11.4130434782609	12.304347826087	32.8913043478261	8.56521739130435	18.195652173913	28.7391304347826	24.8260869565217	30.0869565217391	15.9782608695652	36.1086956521739	34.1086956521739	18.2826086956522	10.9236768091304	6.60107862239944e-11	up-regulated
SEMA4D	344.847826086957	390.04347826087	351.923913043478	306.663043478261	336.54347826087	355.95652173913	320.369565217391	314.347826086957	241.771739130435	317.597826086957	330.326086956522	310.184782608696	295.228260869565	341.5	342.054347826087	298.130434782609	272.565217391304	314.163043478261	315.402173913044	330.086956521739	284.54347826087	292.771739130435	317.95652173913	292.04347826087	261.521739130435	245.739130434783	295.326086956522	235.869565217391	238.282608695652	232	265.95652173913	225.771739130435	251.45652173913	266.141304347826	308.065217391304	273.586956521739	221.934782608696	251.728260869565	186.217391304348	216.108695652174	232.576086956522	206.902173913043	186.891304347826	238.869565217391	222.065217391304	208.239130434783	280.179821586957	6.61894095833919e-11	down-regulated
GLUD1	3028.66304347826	3058.76086956522	2957.17391304348	2935.54347826087	3069.04347826087	3041.97826086957	3214.27173913044	3184.39130434783	3688.84782608696	3357.4347826087	3398.15217391304	3233.36956521739	3231.69565217391	3081.26086956522	3065.97826086957	3207.52173913044	3384.76086956522	3339.23913043478	3045	3536.61956521739	3385.55434782609	3286.76086956522	3528.41304347826	3514.4347826087	3621.28260869565	3530.30434782609	4125.78260869565	3772.23913043478	3598.09782608696	3478.32608695652	3660.5	3868.01086956522	3852.91304347826	3191.13043478261	3485.91304347826	4299.52173913044	4100.4347826087	3301.19565217391	4281.19565217391	3896.38043478261	4094.5652173913	4179.17391304348	4141.38043478261	4825.54347826087	4333.0652173913	3947.54347826087	3551.29065123913	6.95572864475246e-11	up-regulated
ZHX3	374.347826086957	292.532608695652	374.70652173913	425.565217391304	392.652173913044	252.934782608696	352.282608695652	454.586956521739	781.663043478261	382.521739130435	413.630434782609	398.739130434783	617.804347826087	316.45652173913	426.369565217391	401.652173913044	545.54347826087	413.152173913044	513.858695652174	465.79347826087	556.021739130435	541.282608695652	580.521739130435	611.652173913044	686.478260869565	704.5	741.184782608696	688.565217391304	723	759.54347826087	803.45652173913	702.04347826087	821.239130434783	547.945652173913	842.271739130435	721.695652173913	682.673913043478	551.554347826087	768.532608695652	740.945652173913	907.956521739131	881.369565217391	807.315217391304	705.413043478261	848.95652173913	985.760869565217	598.014649347826	7.26629712176391e-11	up-regulated
PEX11A	188.445652173913	191.630434782609	180.760869565217	224.054347826087	195.45652173913	232.717391304348	190.45652173913	244.021739130435	293.782608695652	230.45652173913	182.065217391304	210	225.54347826087	293.967391304348	315.847826086957	239.630434782609	271.869565217391	299.076086956522	302.358695652174	296.804347826087	231.95652173913	246.086956521739	254.260869565217	258.891304347826	271.739130434783	268.902173913044	285.173913043478	269.184782608696	299.010869565217	253.586956521739	304.434782608696	326.739130434783	332.347826086957	264.532608695652	318.467391304348	318.739130434783	381.945652173913	263.380434782609	402	511.173913043478	436.347826086957	392.521739130435	433.45652173913	371.586956521739	406.891304347826	355.891304347826	288.439030934783	7.29069130173483e-11	up-regulated
LMNB1	2243.65217391304	2182.77173913043	2462.73913043478	2471.4347826087	2472.5652173913	2392.14130434783	2477.97826086957	2505.84782608696	1986.80434782609	2365.45652173913	2578.67391304348	2694.97826086957	1859.76086956522	2725.78260869565	2765.65217391304	2720.13043478261	2389.39130434783	2485.07608695652	2677.85869565217	2607.82608695652	2532.19565217391	2062.54347826087	2205.64130434783	2437.16304347826	2197.13043478261	2218.33695652174	2754.09782608696	1990.36956521739	1883	1833.95652173913	1731.86956521739	1730.39130434783	1822.34782608696	1838.95652173913	1479.90217391304	1668.5652173913	1733.83695652174	1937.45652173913	1504.54347826087	1817.54347826087	1681.8152173913	1675.39130434783	1415.21739130435	1275.32608695652	1358.47826086957	1124.5652173913	2108.19914743478	7.29069130173483e-11	down-regulated
WDHD1	1687.73913043478	1823	1922.01086956522	2361.15217391304	2004.82608695652	2168.28260869565	1883.3152173913	2429.26086956522	1385.86956521739	2060.69565217391	2004.10869565217	1892.17391304348	1312	2004.82608695652	1757.39130434783	1878.91304347826	1852.4347826087	1761.83695652174	1773.54347826087	1852.4347826087	1937.07608695652	1615.52173913043	1721.39130434783	1837.15217391304	1773.28260869565	1653.66304347826	1772.73913043478	1495.52173913043	1501.1847826087	1636.47826086957	1286.26086956522	1363.23913043478	1413.21739130435	1739.98913043478	1059.41304347826	1116.98913043478	1146.52173913043	1941.05434782609	1022.23913043478	871.695652173913	903.369565217391	1381.16304347826	769.391304347826	806.804347826087	884.195652173913	1065.84782608696	1598.50472008696	7.37295443411916e-11	down-regulated
CDCA4	931.923913043478	1026.45652173913	965.293478260869	1013.19565217391	953.108695652174	1008.41304347826	987.673913043478	1023.28260869565	955.358695652174	1091.46739130435	1033.13043478261	1069.91304347826	899.369565217391	1042.72826086957	1023.28260869565	1172.83695652174	1055.95652173913	1012.16304347826	987.673913043478	1263.02173913043	1264.9347826087	865.097826086956	901.097826086957	1111.20652173913	894.858695652174	962.510869565217	1079.5	866.04347826087	894.858695652174	838.304347826087	673.04347826087	678.434782608696	671.489130434783	767.815217391304	544.902173913044	617.717391304348	719.695652173913	871.695652173913	588.684782608696	533.04347826087	553.782608695652	670.608695652174	413.391304347826	532.782608695652	575.173913043478	519.315217391304	872.309561565217	7.97023261938664e-11	down-regulated
ACSL5	1.56521739130435	2.02173913043478	1.56521739130435	0.0869565217391304	0.673913043478261	4.93478260869565	2.56521739130435	4.89130434782609	7.43478260869565	1.17391304347826	2.23913043478261	5.93478260869565	12.195652173913	7.86956521739131	15.0652173913043	8.80434782608696	4	12.7173913043478	18.0434782608696	3.84782608695652	2.06521739130435	13	25.195652173913	7.80434782608696	11.2826086956522	20.4565217391304	12.4782608695652	17.804347826087	31.0326086956522	22.8478260869565	14.8913043478261	23.8478260869565	44.5434782608696	3.10869565217391	21.7173913043478	35.4130434782609	48.8804347826087	4.80434782608696	56.3695652173913	50.1521739130435	48.8695652173913	26.1304347826087	56.5217391304348	69.8804347826087	71.9021739130435	30.5869565217391	19.3308128156522	8.34144659531482e-11	up-regulated
POLE	1699.02173913043	1744.52173913043	1864.32608695652	1512.4347826087	1880.39130434783	1640.73913043478	1673.21739130435	1534.98913043478	1831.65217391304	1946.17391304348	1943.86956521739	1627.95652173913	1725.90217391304	1915.54347826087	1893.34782608696	1693.6847826087	1827.79347826087	2101.96739130435	1933.65217391304	1792.10869565217	1727.76086956522	1766.97826086957	1779.80434782609	1574.66304347826	1831.65217391304	1983.65217391304	1797.0652173913	1633.80434782609	1599.36956521739	1494.17391304348	1404.58695652174	1308.02173913043	1279.45652173913	1274.89130434783	1260.51086956522	1627.60869565217	1222.48913043478	1384	1013.88043478261	1174.47826086957	1091.91304347826	971.45652173913	873.456521739131	774.25	888.380434782609	821.369565217391	1550.93408756522	8.39701640940041e-11	down-regulated
NUP107	2936.5652173913	3431.63043478261	3524.45652173913	3390.13043478261	3447.3152173913	3442.5652173913	3542	3296.42391304348	2999.53260869565	3917.71739130435	3237.5652173913	3249.60869565217	2783.58695652174	3688.84782608696	3306.23913043478	3239.76086956522	3377.84782608696	3368.91304347826	3344.28260869565	3215.0652173913	3345.17391304348	3199.10869565217	3120.45652173913	2938.08695652174	3281.23913043478	2947.32608695652	2942.28260869565	3098	2924.21739130435	3015.53260869565	2737.60869565217	2722.73913043478	2850.36956521739	3026.16304347826	2166.84782608696	2610.56521739131	2737.60869565217	3178.95652173913	2494.58695652174	2578.67391304348	2502.36956521739	2621.90217391304	2403.84782608696	2495.36956521739	2322.32608695652	2256.47826086957	3027.34548863043	8.54447833260467e-11	down-regulated
CCDC186	1026.09782608696	976.434782608696	997.945652173913	1111.34782608696	951.804347826087	942.717391304348	1030.23913043478	1089.75	1075.25	980.402173913044	992.54347826087	1099.19565217391	1071.01086956522	914.304347826087	972.663043478261	1068.95652173913	994.456521739131	980.239130434783	992.684782608696	1099.60869565217	764.75	1068.42391304348	1032.69565217391	1121	1124.5652173913	972.663043478261	1200.54347826087	1130.97826086957	1173.5652173913	1240.63043478261	1235.5	1337.91304347826	1223.04347826087	1280.04347826087	1365.28260869565	1157.40217391304	1222.48913043478	1310	1238.26086956522	1383.64130434783	1205.84782608696	1464.96739130435	1467.89130434783	1345.65217391304	1457.53260869565	1456.4347826087	1138.0298006087	8.60867863599791e-11	up-regulated
SLC8B1	293.108695652174	260.695652173913	317.25	345.260869565217	323.45652173913	275.445652173913	290.565217391304	321.228260869565	342.130434782609	301.402173913044	315.141304347826	282.880434782609	279.826086956522	309.347826086957	370.413043478261	344.434782608696	330	342.695652173913	314.260869565217	332.173913043478	313.608695652174	300.913043478261	332.260869565217	324.347826086957	366.108695652174	395.108695652174	395.891304347826	376.021739130435	387.913043478261	383.739130434783	469.434782608696	522.065217391304	571.315217391304	384.141304347826	344.326086956522	513.336956521739	595.913043478261	424.521739130435	623.097826086957	709.271739130435	694.54347826087	532.782608695652	626.239130434783	636.217391304348	578.141304347826	405.858695652174	402.148627847826	8.60867863599791e-11	up-regulated
PNPO	1849.20652173913	1589.04347826087	1992.19565217391	1910.85869565217	1783.97826086957	1664.80434782609	2018.9347826087	1947.36956521739	1831.65217391304	1750.34782608696	1879.34782608696	2108.32608695652	1786.36956521739	1541.14130434783	1605.63043478261	2064.72826086957	1981.0652173913	1661	1843.85869565217	2249	1744.1847826087	1794.13043478261	2107.71739130435	2279.0652173913	2322.85869565217	2075.65217391304	2876.55434782609	2226.5	2365.45652173913	2370.41304347826	2366.45652173913	2762.59782608696	3174.63043478261	2061.64130434783	2378.04347826087	2002.21739130435	2647.75	2413.21739130435	2589.80434782609	2671.57608695652	2844.21739130435	3346.0652173913	2888.17391304348	3153.65217391304	3707.71739130435	3316.5652173913	2250.99382134783	8.60867863599791e-11	up-regulated
GMPS	4528.17391304348	4583.65217391304	4408.52173913044	4879.10869565218	4659.67391304348	4444.32608695652	4473.82608695652	4866.9347826087	3863.82608695652	4569.63043478261	5019.08695652174	5111.9347826087	3917.71739130435	4604.86956521739	4411.58695652174	4892.39130434783	4519.97826086957	4444.32608695652	4528.17391304348	4729.60869565217	4684.82608695652	4007.86956521739	4569.63043478261	4515.41304347826	4207.52173913044	4335.9347826087	4676.47826086957	4144.03260869565	4205.02173913044	4137.36956521739	3637.94565217391	3756.82608695652	3781.53260869565	4241.08695652174	3258.28260869565	3454.4347826087	3496.63043478261	4435.34782608696	3359.34782608696	3081.26086956522	3118.47826086957	3833.22826086957	2884.33695652174	3208.52173913044	3167.04347826087	3511.21739130435	4155.803656	8.63101109620383e-11	down-regulated
PDE8A	4029.10869565217	4367.32608695652	4266.97826086957	4089.4347826087	4232.95652173913	4419.4347826087	4119.67391304348	3950.45652173913	2476.71739130435	3934.3152173913	3686.73913043478	3840.27173913044	2966.04347826087	3749.76086956522	3609.02173913044	3630.69565217391	2726.73913043478	3611.26086956522	3554.90217391304	3460.44565217391	2942.28260869565	3444.19565217391	3331.79347826087	3169.5652173913	3029.39130434783	2819.83695652174	2924.21739130435	2796.55434782609	2970.80434782609	2891.30434782609	2853.91304347826	2817.52173913044	2726.26086956522	3183.08695652174	2589.80434782609	2712.52173913044	2629.3152173913	3367.26086956522	2413.21739130435	2665.17391304348	2342.84782608696	2355.15217391304	2382.73913043478	2563	2507.07608695652	2490.08695652174	3209.59146693478	8.83972217052686e-11	down-regulated
ANXA1	41855.1739130435	43905.1739130435	40415.152173913	47197.6956521739	48188.7608695652	43212.4130434783	43212.4130434783	49366.7391304348	36602.3695652174	41855.1739130435	42491.5652173913	44632.652173913	35639.8913043478	39691.6304347826	36602.3695652174	43905.1739130435	40415.152173913	40415.152173913	33465.9130434783	43905.1739130435	41855.1739130435	36602.3695652174	36602.3695652174	41855.1739130435	35639.8913043478	37521.152173913	41855.1739130435	36602.3695652174	34346.4347826087	35088.2173913044	33465.9130434783	32718.9130434783	33465.9130434783	35639.8913043478	28247.9347826087	31961.847826087	36080.7173913043	39691.6304347826	31571.4130434783	26446.6739130435	29079.3695652174	32718.9130434783	27379.8695652174	31571.4130434783	30541.7391304348	29594.0869565217	37502.6150660435	9.19542547466482e-11	down-regulated
CASP8AP2	1156.23913043478	1227.15217391304	1273.4347826087	1370.60869565217	1430.26086956522	1360.82608695652	1157.21739130435	1283.02173913043	952.347826086956	1296.69565217391	1236.97826086957	1401.76086956522	1113.75	1260.02173913044	1157.0652173913	1289.20652173913	1290.95652173913	1160.19565217391	1250.13043478261	1283.76086956522	1121.97826086957	1229.13043478261	1128.19565217391	1230.85869565217	1138.47826086957	1195.89130434783	1179.9347826087	1001.69565217391	987.065217391304	1066.13043478261	883.619565217391	938.065217391304	910.608695652174	1158.36956521739	882.065217391305	866.934782608696	853.695652173913	1245.71739130435	781.782608695652	827.358695652174	780.239130434783	968.021739130435	836.695652173913	754.217391304348	782.478260869565	896.706521739131	1099.94709032609	9.19542547466482e-11	down-regulated
HMGA1	2943.04347826087	2605.10869565217	2701.26086956522	2334.02173913044	2204.03260869565	2603.91304347826	2983.9347826087	2416.63043478261	2214.36956521739	2396.80434782609	2555.34782608696	2800.28260869565	2444.01086956522	2489.65217391304	2359.15217391304	2692.73913043478	2314.26086956522	2308.63043478261	2415.02173913044	2297.66304347826	2521.54347826087	2167.15217391304	2437.16304347826	2423.09782608696	2151.46739130435	2381.28260869565	2403.84782608696	2289.15217391304	2424.60869565217	1991.36956521739	1824.88043478261	2166.84782608696	2179.47826086957	2191.89130434783	2070.39130434783	2247.54347826087	2143.14130434783	2101.96739130435	1611.09782608696	1842.63043478261	2223.95652173913	1788.26086956522	1705.71739130435	1690.54347826087	1681.8152173913	1763.09782608696	2271.82229206522	9.57425891490593e-11	down-regulated
MGAT5B	475.326086956522	589.869565217391	533.586956521739	426.673913043478	604.869565217391	579.847826086957	459.717391304348	404.152173913044	323.5	582.608695652174	434.673913043478	478.652173913044	280.869565217391	564.413043478261	497	472.152173913044	344.434782608696	550.652173913044	393.608695652174	376.532608695652	401.804347826087	429.576086956522	346.739130434783	377.597826086957	363.228260869565	353.608695652174	308.20652173913	373.434782608696	384.75	304.217391304348	313.54347826087	307.880434782609	290.478260869565	331.717391304348	243.652173913043	380.869565217391	244.369565217391	371.521739130435	282.20652173913	266.282608695652	190.521739130435	213.673913043478	191.869565217391	214.5	172.521739130435	168.576086956522	373.923676652174	9.9457012791987e-11	down-regulated
MT1X	191.978260869565	204.934782608696	190.423913043478	172.760869565217	293.521739130435	317.25	247.565217391304	148.532608695652	1526.98913043478	449.434782608696	460.152173913044	510.565217391304	1116.73913043478	679.108695652174	512.391304347826	820.891304347826	999.108695652174	891.195652173913	723.358695652174	1261.15217391304	934.304347826087	1052.65217391304	1147.75	1661.61956521739	1668.23913043478	1771.28260869565	2600.36956521739	2450.71739130435	1794.13043478261	1708.21739130435	2124.05434782609	2350.76086956522	2244.92391304348	591.521739130435	1402.15217391304	2189.28260869565	2027.08695652174	423.282608695652	2784.80434782609	2498.84782608696	2432.23913043478	2119.76086956522	2940.32608695652	3451.5	2824.45652173913	1679.73913043478	1360.69731258696	9.9457012791987e-11	up-regulated
SHC1	5111.9347826087	5362.76086956522	6115.78260869565	5513.5652173913	5305.15217391304	5870.83695652174	6225.89130434783	5725.45652173913	9613.60869565217	6037.19565217391	5738.14130434783	5796.89130434783	7692.96739130435	6273.86956521739	5600.14130434783	7316.17391304348	8110.69565217391	7495.17391304348	6521.71739130435	8168.67391304348	7708.60869565217	7751.13043478261	8110.69565217391	8762.34782608696	9567.08695652174	9366.73913043478	10887.9347826087	10035.8260869565	9976.76086956522	8788.15217391304	10827.3913043478	11310.8913043478	11558.2608695652	6784.10869565217	8442.17391304348	10446.1304347826	12003.6956521739	6704.73913043478	10667.0869565217	11078.0652173913	11651.652173913	10850.5652173913	11165.0869565217	12286.8043478261	11940.9565217391	9990.86956521739	8440.44354254348	1.01440324200597e-10	up-regulated
B4GALNT1	1023.40217391304	1071.98913043478	1026.36956521739	989.260869565217	1078.4347826087	1057.39130434783	1002.10869565217	1012.5652173913	884.847826086957	958.836956521739	914.304347826087	1011.41304347826	889.79347826087	1018.47826086957	1029.69565217391	991.673913043478	925.891304347826	987.206521739131	1068.79347826087	921.478260869565	844.065217391304	965.065217391304	943.260869565217	914.978260869565	966.673913043478	933.478260869565	936.869565217391	909.478260869565	960.847826086957	876.826086956522	837.304347826087	924.086956521739	894.717391304348	960.608695652174	859.95652173913	825.347826086957	755.673913043478	965.065217391304	733.75	828.673913043478	823.336956521739	812.054347826087	738.913043478261	782.304347826087	790.304347826087	702.326086956522	920.65005473913	1.0600757563522e-10	down-regulated
E2F7	1024.85869565217	1295.22826086957	1287.32608695652	1512.91304347826	1345.82608695652	1307.28260869565	1093.27173913043	1430.71739130435	1185.23913043478	1455.29347826087	1312.76086956522	1494.66304347826	1172.83695652174	1340.73913043478	1616.10869565217	1396.5	1610.71739130435	1320.33695652174	1583.45652173913	1305.02173913043	1446.4347826087	1327.48913043478	1367.58695652174	1304.13043478261	1245.89130434783	1222.65217391304	1191.95652173913	973.79347826087	1238.80434782609	1344.65217391304	723	665.521739130435	682.782608695652	1042.95652173913	560.086956521739	614.347826086957	679.652173913044	1184.08695652174	507.695652173913	659.54347826087	542.260869565217	717.065217391304	397.804347826087	358.467391304348	495.826086956522	592.673913043478	1090.83176176087	1.07795061860588e-10	down-regulated
CGNL1	131.173913043478	110.04347826087	107.869565217391	123.695652173913	90.7391304347826	88.8586956521739	111.934782608696	120.20652173913	76.5869565217391	140.152173913043	117.521739130435	104.065217391304	87.2173913043478	80.4565217391304	103.782608695652	107.75	106.565217391304	102.869565217391	135.434782608696	97.9239130434783	98.2391304347826	108.5	115.510869565217	102.608695652174	75.2391304347826	73.2826086956522	85.8695652173913	79.3152173913044	64.6195652173913	73.8913043478261	64.804347826087	51.7282608695652	73.5978260869565	84.9130434782609	67.3913043478261	67.0217391304348	45.6304347826087	68.6521739130435	47.8369565217391	64.9891304347826	59.1086956521739	62.0760869565217	33.5652173913044	33.6086956521739	49.5	67.7608695652174	86.1762775	1.08555926591004e-10	down-regulated
ARNT2	672.869565217391	823.336956521739	840.695652173913	808.478260869565	790.510869565217	797.847826086957	769.565217391304	801.239130434783	751.934782608696	876.95652173913	829.347826086957	862.815217391304	819.347826086957	991.195652173913	961.04347826087	920.010869565217	917.565217391304	864.195652173913	987.673913043478	824.75	911.184782608696	779.728260869565	789.304347826087	813.695652173913	763.336956521739	778.195652173913	807.54347826087	733.217391304348	701.130434782609	721.695652173913	533.347826086957	603.739130434783	687.728260869565	694.717391304348	553.54347826087	558.54347826087	550.521739130435	683.369565217391	459.913043478261	579.119565217391	547.152173913044	513.434782608696	416.5	472.576086956522	486.402173913044	471.673913043478	728.754257630435	1.1146252300575e-10	down-regulated
TTL	2869.26086956522	2897.6847826087	2996.28260869565	2931.21739130435	2985.21739130435	3018.72826086957	2946.01086956522	2929.07608695652	2976.5652173913	2759.5	2713.88043478261	3091.02173913044	2959.4347826087	2729.69565217391	2914.23913043478	2887.54347826087	3033.65217391304	2853.38043478261	2849.47826086957	2819.83695652174	2930.46739130435	2691.5	2684.30434782609	3004.30434782609	2618.28260869565	2704.5652173913	2773.84782608696	2584.51086956522	2729.69565217391	2589.15217391304	2597.9347826087	2595.27173913044	2747.64130434783	2864.69565217391	2609.58695652174	2584.97826086957	2421.09782608696	2811.86956521739	2520.4347826087	2450.15217391304	2508.45652173913	2692.73913043478	2309.09782608696	2402.38043478261	2403.32608695652	2558.52173913044	2751.09831193478	1.15140698669863e-10	down-regulated
GLP2R	934.108695652174	858.913043478261	822.217391304348	649.478260869565	687.804347826087	784.565217391304	760.739130434783	741.739130434783	498.130434782609	907.391304347826	925.891304347826	814.04347826087	539.630434782609	833.760869565217	774.891304347826	671.217391304348	515.608695652174	680.869565217391	743.217391304348	632.152173913044	599.956521739131	675.336956521739	647.815217391304	650.717391304348	561.826086956522	556.456521739131	553.913043478261	523.391304347826	486.5	497.989130434783	359.576086956522	488.521739130435	400.804347826087	547.945652173913	713.880434782609	438.032608695652	374.086956521739	565.630434782609	335.25	349.891304347826	398.271739130435	351.869565217391	281.521739130435	388.04347826087	413.760869565217	418.358695652174	594.689508652174	1.22086513422669e-10	down-regulated
MCM5	1933.19565217391	1983.65217391304	1700.4347826087	1376.0652173913	1899.10869565217	1823.38043478261	1891.46739130435	1315.5652173913	1603.9347826087	2173.55434782609	2036.04347826087	1611.76086956522	1630.82608695652	2189.73913043478	1867.65217391304	1467.63043478261	1577.19565217391	2047.89130434783	1681.22826086957	1413.47826086957	1943.86956521739	1894.63043478261	1684.3152173913	1344.28260869565	1606.39130434783	1550.19565217391	1260.26086956522	1595.91304347826	1378.04347826087	1309.47826086957	1303.70652173913	1295.08695652174	1290.4347826087	1273.08695652174	1382.0652173913	1516.13043478261	969.706521739131	1224.76086956522	959.152173913044	1040.69565217391	869.956521739131	859.413043478261	864.760869565218	808.913043478261	732.45652173913	702.326086956522	1475.73557493478	1.23380794709561e-10	down-regulated
GLA	2431.32608695652	2642.5	2282.40217391304	2326.65217391304	2238.6847826087	2459.98913043478	2341.65217391304	2258.63043478261	1915.54347826087	2513.76086956522	2702.63043478261	2140.26086956522	2075.34782608696	2614.46739130435	2551.16304347826	1996.63043478261	1897.5	2368.64130434783	2239.91304347826	1830.76086956522	2295.1847826087	1924.61956521739	1968.76086956522	1658.16304347826	1657.47826086957	1888.5652173913	1558.52173913043	1736.84782608696	1765.17391304348	1651.86956521739	1785.97826086957	1590.69565217391	1604.58695652174	1867.65217391304	1711.4347826087	1828.30434782609	1680.58695652174	1876.67391304348	1599.36956521739	1544.34782608696	1659.0652173913	1435.36956521739	1660.30434782609	1380.5	1449.27173913043	1464.23913043478	1958.08741869565	1.27611558457073e-10	down-regulated
SDS	16.695652173913	26.4782608695652	36.1086956521739	51.9130434782609	47.8913043478261	38.1304347826087	25.0869565217391	37.4130434782609	54.804347826087	14.4782608695652	23.1086956521739	46.9565217391304	20.7391304347826	43.554347826087	43.9456521739131	55.3260869565218	72.7826086956522	49.7826086956522	42.6086956521739	69.7717391304348	34.6086956521739	50.5869565217391	48.6847826086957	101.739130434783	110.184782608696	150.45652173913	233.163043478261	159.467391304348	137.45652173913	196.652173913043	339.902173913044	280.869565217391	436.913043478261	130.934782608696	89.8260869565217	196.478260869565	488.619565217391	195.54347826087	559.315217391304	430.065217391304	452.652173913044	513.434782608696	401.804347826087	340.086956521739	488.45652173913	189.260869565217	164.668241717391	1.30117751019082e-10	up-regulated
SERPINA3	1.56521739130435	0	0	2	5.89130434782609	3	3.23913043478261	0	11.7826086956522	5	5.65217391304348	3.89130434782609	3.69565217391304	11.2608695652174	5	12.5978260869565	4	2.17391304347826	6.54347826086957	5.89130434782609	2.06521739130435	8	14.4565217391304	10.6739130434783	12.1304347826087	7.30434782608696	13.3478260869565	18.6086956521739	6.26086956521739	15.2173913043478	14.8913043478261	24.5760869565217	25.945652173913	7.08695652173913	19.5869565217391	23.3913043478261	48.8804347826087	8.56521739130435	30.4347826086957	34.3260869565217	28.8260869565217	20.804347826087	31.5	39.8695652173913	48.5652173913044	22.9347826086957	13.7268432173913	1.3102156029594e-10	up-regulated
RTN4RL2	612.130434782609	850.79347826087	753.989130434783	774.891304347826	821.521739130435	826.141304347826	930.586956521739	700.065217391304	258.815217391304	638.239130434783	601.586956521739	834.652173913043	339.152173913044	852.065217391304	791.804347826087	784.782608695652	405.652173913044	655.695652173913	572.934782608696	595.228260869565	504.967391304348	443.760869565217	443.413043478261	499.728260869565	443.413043478261	536.315217391304	386.423913043478	329.565217391304	405.152173913044	343.173913043478	260.195652173913	270.695652173913	261.152173913044	372.130434782609	157.326086956522	324.391304347826	225.5	525.434782608696	218.5	245.173913043478	209.717391304348	173.195652173913	256.336956521739	244.782608695652	182.065217391304	139.75	478.325851847826	1.34360403306932e-10	down-regulated
HAUS8	207.913043478261	145.086956521739	164.086956521739	221.010869565217	205.217391304348	165.641304347826	161.815217391304	224	171.891304347826	189.869565217391	194.717391304348	201.413043478261	160.782608695652	173.934782608696	190.304347826087	174.847826086957	135.739130434783	201.413043478261	132.304347826087	196.532608695652	166.065217391304	173.760869565217	151.152173913043	162.45652173913	152.95652173913	170.782608695652	181.04347826087	147.086956521739	150.054347826087	140.347826086957	130.021739130435	140.391304347826	134.760869565217	128.391304347826	135.217391304348	123.586956521739	102.45652173913	152.29347826087	105.630434782609	102.217391304348	126.717391304348	138.29347826087	85.7065217391305	114.760869565217	91.0543478260869	101.804347826087	154.946362	1.34445095452509e-10	down-regulated
CENPJ	691.45652173913	733.75	738.652173913044	771.315217391304	797.847826086957	734.326086956522	716.391304347826	717.684782608696	604.945652173913	692.54347826087	724.771739130435	725.065217391304	625.021739130435	815.336956521739	676.391304347826	716.29347826087	585.065217391304	728.934782608696	738.913043478261	707.119565217391	602.347826086957	736.29347826087	597.913043478261	645.782608695652	655.804347826087	551.554347826087	605.673913043478	588.391304347826	559.315217391304	662.521739130435	625.75	558.630434782609	515.95652173913	694.717391304348	520.684782608696	558.54347826087	586.826086956522	715.119565217391	521.304347826087	531.619565217391	533.586956521739	533.478260869565	405.04347826087	454.086956521739	478.20652173913	475.652173913044	633.839794978261	1.43266270893924e-10	down-regulated
LRP8	1272.72826086957	1350.86956521739	1355.25	1166.0652173913	1361.82608695652	1434.0652173913	1293.55434782609	1156.23913043478	948.717391304348	1673.95652173913	1632.34782608696	1546.09782608696	1079.5	1550.95652173913	1408.57608695652	1446.4347826087	924.336956521739	1510.21739130435	1379.67391304348	1336.57608695652	1156.4347826087	1210.03260869565	1350.13043478261	1148.67391304348	1066.66304347826	994.456521739131	1191.95652173913	1057.73913043478	980.239130434783	891.336956521739	846.923913043478	844.521739130435	748.478260869565	885.956521739131	927.217391304348	929.434782608696	782.478260869565	950.913043478261	721.934782608696	863.195652173913	765.195652173913	705.152173913044	722.032608695652	708.891304347826	746.630434782609	690.217391304348	1102.4962221087	1.49884797016032e-10	down-regulated
GYS1	1094.01086956522	896.706521739131	1006.9347826087	887.163043478261	1004.45652173913	938.75	1063.03260869565	849.239130434783	1072.48913043478	835.771739130435	962.369565217391	1035.54347826087	1181.02173913043	806.45652173913	873.021739130435	992.826086956522	984.239130434783	950.239130434783	1058.71739130435	975.956521739131	999.413043478261	987.065217391304	1031.82608695652	1041.41304347826	1016.34782608696	1076.26086956522	1171.5	1078.04347826087	1155.36956521739	1052.52173913043	1194.07608695652	1178.9347826087	1250.63043478261	1070.76086956522	1279.10869565217	1113.30434782609	1273.4347826087	1016.02173913043	1357.20652173913	1261.54347826087	1323.38043478261	1165.84782608696	1386.04347826087	1344.28260869565	1513.76086956522	1321.65217391304	1089.75422758696	1.49884797016032e-10	up-regulated
HJURP	2556.40217391304	2797.95652173913	2637.8152173913	2525.17391304348	2669.05434782609	2617.65217391304	2620.21739130435	2560.52173913044	1664.29347826087	2531.75	2610.98913043478	2727.80434782609	1583.25	2433.90217391304	2296.52173913044	2388.33695652174	1699.32608695652	1987.13043478261	1891.13043478261	1857.94565217391	1811.79347826087	1797.0652173913	1649.60869565217	1773.01086956522	1749.41304347826	1673.95652173913	1953.86956521739	1849.54347826087	1680.58695652174	1774.71739130435	1599.92391304348	1602.41304347826	1506.96739130435	1881.11956521739	1284.86956521739	1535.40217391304	1551.89130434783	2262.36956521739	1521.59782608696	1732.80434782609	1534.98913043478	1428.47826086957	1350.69565217391	1233.78260869565	1171.5	1164.19565217391	1928.9943336087	1.57517221641451e-10	down-regulated
HELLS	3955.82608695652	3858.34782608696	4288.22826086957	5203.34782608696	4799.04347826087	4326.65217391304	3664.91304347826	5100.17391304348	3065.26086956522	4606.82608695652	4497.01086956522	5144.17391304348	3393.0652173913	3947.54347826087	4088.25	4773.0652173913	3787.58695652174	3562.21739130435	4504.45652173913	5050.73913043478	3919.11956521739	3514.4347826087	3600.91304347826	4202.08695652174	3524.45652173913	3405.13043478261	4008.97826086957	2736.95652173913	3085.73913043478	3572.13043478261	2586.26086956522	2581.84782608696	2606.64130434783	3976.02173913044	2293.3152173913	2008.69565217391	1961.67391304348	4295.9347826087	1782.89130434783	1791.76086956522	1710.55434782609	2883.65217391304	1603.1847826087	1710.9347826087	1668.89130434783	2445	3458.56379113044	1.58934390543521e-10	down-regulated
DSN1	1873.36956521739	1973.94565217391	1877.09782608696	1838.95652173913	1805.71739130435	2065.10869565217	1729.52173913043	1860.45652173913	1381.36956521739	2004.82608695652	1870.54347826087	1754.59782608696	1365.28260869565	1592	1481.57608695652	1701	1699.32608695652	1529.02173913043	1565.80434782609	1840.26086956522	1787.89130434783	1786.91304347826	1620.38043478261	1679.98913043478	1730.86956521739	1423.28260869565	1763.67391304348	1552.44565217391	1518.27173913043	1567.97826086957	1325.63043478261	1429.20652173913	1381.5652173913	1633.47826086957	1269.97826086957	1008.54347826087	1065.45652173913	1756.08695652174	921.478260869565	787.532608695652	898.25	1354.78260869565	769.391304347826	936.652173913044	1003.23913043478	1171.5	1520.74457428261	1.59610062397057e-10	down-regulated
RAD51	238.652173913043	226.021739130435	217.076086956522	288.195652173913	288.760869565217	261.880434782609	238.760869565217	282.880434782609	217.282608695652	216.04347826087	220.260869565217	294.20652173913	238.347826086957	267.021739130435	264.532608695652	298.130434782609	342.380434782609	245.260869565217	237.434782608696	278.695652173913	278.663043478261	237	253.086956521739	263.271739130435	248.869565217391	224.369565217391	275.152173913044	205.760869565217	182.065217391304	207.760869565217	177.086956521739	190.347826086957	172.869565217391	228.934782608696	142.760869565217	168.869565217391	145.195652173913	227.010869565217	123.152173913043	117.391304347826	109.413043478261	135.804347826087	97.2391304347826	90.0217391304348	98.1086956521739	115.967391304348	214.739132673913	1.59610062397057e-10	down-regulated
ELOVL5	6695.21739130435	7087.82608695652	7095.80434782609	6981.21739130435	6919.60869565217	7119.80434782609	6974.73913043478	7281.19565217391	7688.9347826087	6997.19565217391	6466.84782608696	6521.71739130435	6309.60869565217	6050.15217391304	5777.17391304348	6739.13043478261	6879.52173913044	6558.73913043478	5975.86956521739	7338.91304347826	6634.19565217391	7406.36956521739	7423.34782608696	7648.56521739131	8392.0652173913	7648.56521739131	8685.21739130435	8539.60869565217	8302.02173913044	8511.21739130435	8524.04347826087	8950.47826086957	9046.4347826087	7533.84782608696	7803.15217391304	7751.13043478261	9567.08695652174	7932.76086956522	9338	8496.54347826087	8734.63043478261	10429.1304347826	8501.4347826087	11371.5543478261	11265.4347826087	10738.5	7839.88145554348	1.59610062397057e-10	up-regulated
FBXO5	978.467391304348	1073.32608695652	1014.48913043478	1040.30434782609	927.217391304348	987.347826086956	877.641304347826	1071.15217391304	1024.59782608696	1060.69565217391	1117.65217391304	1030.84782608696	1026.36956521739	1080.96739130435	1067.9347826087	1077.66304347826	1150.41304347826	913.728260869565	998.347826086957	1055.38043478261	1080.82608695652	1018.69565217391	1002.95652173913	988.456521739131	1050.4347826087	996.934782608696	1119.25	940.934782608696	1007.8152173913	1123.5652173913	737.782608695652	789.434782608696	809.065217391304	841.326086956522	607.195652173913	754.304347826087	737.869565217391	924.45652173913	676.608695652174	613.891304347826	599.956521739131	784.565217391304	487.358695652174	562.945652173913	518.869565217391	576.782608695652	911.452722847826	1.60024264183109e-10	down-regulated
TGM2	16841.8695652174	14035.8695652174	16040.2608695652	12868.9782608696	17763.152173913	14609.7826086957	17500.1086956522	12753.8913043478	29594.0869565217	16227.7608695652	16674.5217391304	15112.1086956522	25302.0434782609	15909.0217391304	16982.5869565217	15760.3043478261	23211.4565217391	17361.8695652174	15804.847826087	16104.7391304348	23043.5652173913	19210.6739130435	20647.4347826087	18908.1739130435	22745.7173913044	27892.4565217391	24393.8695652174	27101.6086956522	27379.8695652174	20979.3043478261	28762.7391304348	25132.9130434783	27892.4565217391	17044.0652173913	27379.8695652174	26057.5869565217	27642.9347826087	16104.7391304348	39030.347826087	29342.2391304348	34687.7173913043	31571.4130434783	41855.1739130435	33960	36080.7173913043	31215.1086956522	22880.9122495217	1.61775828517454e-10	up-regulated
ELOVL2	1406.97826086957	1321.13043478261	1058.83695652174	1313	1253.32608695652	1211.55434782609	907.478260869565	1361.08695652174	1009.80434782609	1326.05434782609	1262.84782608696	1457.94565217391	1186.02173913043	1289.02173913043	1211.36956521739	1349.5	985.326086956522	1029.23913043478	1116.5652173913	1231.1847826087	1102.65217391304	1000.79347826087	1211	1209.02173913043	934.467391304348	992.260869565217	1065.98913043478	869.271739130435	1012.5652173913	995.565217391304	827.358695652174	895.065217391304	730.413043478261	1230.45652173913	965.065217391304	738.815217391304	729.054347826087	1218.17391304348	730.826086956522	646.695652173913	577.54347826087	783.304347826087	608.978260869565	659.173913043478	542.326086956522	760.358695652174	1028.81452615217	1.61775828517454e-10	down-regulated
MAP4K5	2206.35869565217	2285.02173913044	2113.64130434783	2300.82608695652	2193.97826086957	2188.08695652174	2208.11956521739	2325.4347826087	2305.80434782609	2154.54347826087	2253.60869565217	2224.73913043478	2532.19565217391	2327.07608695652	2275.48913043478	2216.19565217391	2292.78260869565	2199.25	2067.28260869565	2165.25	2147.48913043478	2165.25	2111.84782608696	2083.45652173913	1970.1847826087	1976.20652173913	2067.28260869565	1951.80434782609	2019.65217391304	1924.61956521739	1917.34782608696	1820.96739130435	1753.94565217391	2169.76086956522	2055.80434782609	1782.01086956522	1933.65217391304	2112.11956521739	1882.26086956522	1714.61956521739	1839.91304347826	1885.97826086957	1926.72826086957	1829.30434782609	1716.55434782609	1819.72826086957	2074.22117869565	1.63103266419501e-10	down-regulated
POLE3	4239.04347826087	4072.32608695652	4128.32608695652	4182.21739130435	4166.69565217391	3979.13043478261	4018.76086956522	4269.5	3747.65217391304	4108.57608695652	4320.5	4097.4347826087	3658.45652173913	3917.71739130435	4341	4232.95652173913	3937.28260869565	3831.76086956522	4137.36956521739	3960.19565217391	4343.97826086957	3693.63043478261	3984.86956521739	3705.47826086957	3704.08695652174	3956.9347826087	4274.91304347826	3735.41304347826	3900.58695652174	3976.02173913044	3435.26086956522	3246.60869565217	3360.3152173913	3641.4347826087	3248.92391304348	3117.53260869565	3345.17391304348	3823.40217391304	3370.91304347826	3106.52173913044	3459.65217391304	3646	3164.32608695652	3114.64130434783	3125.79347826087	3285.97826086957	3785.11508132609	1.67821432091614e-10	down-regulated
SLC7A8	3.23913043478261	6.93478260869565	8.95652173913044	6.80434782608696	9.60869565217391	3	5.19565217391304	13.1847826086957	40.0652173913044	1.17391304347826	11.2934782608696	7.91304347826087	33.1521739130435	16.9021739130435	16.2826086956522	12.5978260869565	26.6086956521739	19.6521739130435	30.8913043478261	28.8369565217391	13.0434782608696	46.4130434782609	38.2826086956522	37.2717391304348	73.0652173913044	82.7391304347826	46.6739130434783	58.8260869565217	47.9130434782609	32.7826086956522	65.9347826086957	74.7391304347826	75.9565217391304	24.5434782608696	53.6304347826087	84.0217391304348	86.1195652173913	20.5978260869565	70.4021739130435	99.1304347826087	102.130434782609	63.0217391304348	77.304347826087	79.6739130434783	85.9021739130435	54.4347826086957	41.2358215652174	1.69592381828223e-10	up-regulated
BCAS1	101.108695652174	108.141304347826	129.847826086957	81.8478260869565	84.8586956521739	120.521739130435	125.20652173913	85.7608695652174	25.2826086956522	131.586956521739	132.369565217391	109.152173913043	24.304347826087	100.95652173913	116.358695652174	66.804347826087	30.695652173913	99.1304347826087	106.826086956522	61	37.9782608695652	77.0434782608696	83.8913043478261	67.0869565217391	59.2173913043478	58.3695652173913	50.5869565217391	47.6086956521739	36.1521739130435	43.5434782608696	28.4565217391304	35.0869565217391	23.3152173913044	33.4021739130435	14.8913043478261	27.3478260869565	27.2391304347826	37.3913043478261	4.95652173913044	18.1304347826087	17.7826086956522	8.93478260869565	13.5217391304348	6	3.89130434782609	9.18478260869565	58.9732988043478	1.69592381828223e-10	down-regulated
PARD3	3940.90217391304	3958.04347826087	3822.39130434783	3256.02173913044	4001.23913043478	3998.4347826087	3939.32608695652	3062.08695652174	2552.69565217391	3984.86956521739	3829.21739130435	3762.46739130435	2705.76086956522	4128.32608695652	3822.39130434783	3439.73913043478	2813.72826086957	3768.91304347826	3142.84782608696	2760.63043478261	3119.67391304348	3034.97826086957	3038.40217391304	2543.28260869565	2430.08695652174	2488.65217391304	2167.86956521739	2534.08695652174	2252.30434782609	2321.25	2369.78260869565	2108.02173913044	2305.80434782609	2439.39130434783	2289.64130434783	2635.54347826087	2249.4347826087	2589.15217391304	2296.52173913044	2286.70652173913	2247.54347826087	1785.28260869565	2497.10869565217	2050.08695652174	1947.72826086957	1782.39130434783	2880.45129397826	1.78419020782631e-10	down-regulated
TIMELESS	3724.5652173913	3692.48913043478	3576.36956521739	3291.91304347826	3506.80434782609	3649.5652173913	3576.36956521739	3226.98913043478	3330.84782608696	3736.55434782609	3681.15217391304	3125.19565217391	3452.5652173913	4011.13043478261	4050.36956521739	3234.26086956522	3321.9347826087	4023.9347826087	3576.36956521739	2986.60869565217	3485.91304347826	3616.67391304348	3560.41304347826	2934.92391304348	3211.09782608696	3258.28260869565	2746.58695652174	3403.78260869565	3009.8152173913	2875.27173913044	2848.86956521739	2863.04347826087	2787.41304347826	2900.76086956522	2981.54347826087	3465.30434782609	2792.5	2983.9347826087	2539.84782608696	2749.71739130435	2584.04347826087	2321.25	2373.0652173913	2329.05434782609	1974.72826086957	2173.13043478261	3164.06426932609	1.86306592826896e-10	down-regulated
RGP1	1116.10869565217	1182.9347826087	1255.73913043478	1195.16304347826	1125.23913043478	1203.67391304348	1163.28260869565	1158.76086956522	1132.89130434783	1037.29347826087	984.956521739131	1091.73913043478	1169.22826086957	1085.91304347826	1166.45652173913	1041.28260869565	1036.94565217391	1150.61956521739	1181.02173913043	1101.23913043478	970.684782608696	1206.38043478261	1242.39130434783	1113.91304347826	1324.9347826087	1204.0652173913	1272.08695652174	1206.23913043478	1181.86956521739	1275.5	1363.23913043478	1557.5652173913	1577.19565217391	1326.28260869565	1592.5652173913	1543.47826086957	1519.32608695652	1361.52173913043	1487.60869565217	1707.96739130435	1659.0652173913	1621.36956521739	1527.92391304348	1436.63043478261	1487.23913043478	1634.13043478261	1282.21005763044	1.86306592826896e-10	up-regulated
CDCA2	2599.10869565217	2937.32608695652	2951.42391304348	3075.15217391304	3040.60869565217	2961.29347826087	2918.42391304348	2871.46739130435	2364.95652173913	2706.91304347826	2829.67391304348	3071.78260869565	2383.86956521739	2952.64130434783	3414.15217391304	3135.80434782609	2947.32608695652	2797.52173913044	3133.08695652174	2807.10869565217	2903.23913043478	2478.44565217391	2495.36956521739	2519.20652173913	2443.5652173913	2665.79347826087	2475.33695652174	2481.32608695652	2556.9347826087	2583.08695652174	2271.59782608696	1989.98913043478	2357.5652173913	2765.15217391304	1935.23913043478	1923.65217391304	2270.73913043478	2939.67391304348	2094.08695652174	2138.5	1967.73913043478	2187.0652173913	1507.19565217391	1449.47826086957	1601.4347826087	1797.58695652174	2536.92699902174	1.87475573043264e-10	down-regulated
C14orf132	676.04347826087	690.554347826087	579.565217391304	443.978260869565	499.369565217391	522.934782608696	581.086956521739	436.576086956522	369.630434782609	576.782608695652	471.391304347826	453.130434782609	428.619565217391	558.141304347826	519.369565217391	428.173913043478	434.304347826087	589.717391304348	481.586956521739	461.152173913044	410.434782608696	582.663043478261	451.445652173913	446.413043478261	386.619565217391	310.152173913044	337.478260869565	339.260869565217	266.326086956522	326.95652173913	279.521739130435	316.695652173913	334.20652173913	389.021739130435	495.771739130435	317.54347826087	281.869565217391	339.586956521739	201.369565217391	268.902173913044	237.565217391304	222.217391304348	232.891304347826	233.630434782609	219.858695652174	261.630434782609	406.350900282609	1.9082154189827e-10	down-regulated
DNAJC15	2.32608695652174	3.93478260869565	6.97826086956522	0.956521739130435	4.86956521739131	11.8695652173913	7.1304347826087	2.02173913043478	165.695652173913	8.97826086956522	26.4782608695652	11.9565217391304	111.836956521739	37.0217391304348	31.3478260869565	26.1304347826087	85.1739130434783	67.3369565217391	29.6739130434783	76.1847826086957	45.1630434782609	119.217391304348	124.869565217391	84.2065217391304	157.532608695652	96.7826086956522	94.6521739130435	169.75	155.923913043478	173.54347826087	144.467391304348	170.630434782609	141.891304347826	52.5652173913044	153.04347826087	162.119565217391	274.173913043478	28.6739130434783	211.086956521739	185.347826086957	206.95652173913	136.326086956522	202.195652173913	220.70652173913	264.869565217391	178.586956521739	101.590975732609	1.9225880722986e-10	up-regulated
TUBB	27379.8695652174	26057.5869565217	24087.4347826087	22745.7173913044	25680.7608695652	24960.2608695652	24234.6956521739	22475.0217391304	24669.1086956522	26851.652173913	24234.6956521739	23785.6086956522	25680.7608695652	24669.1086956522	25680.7608695652	23921.5434782609	26446.6739130435	24809.4565217391	24393.8695652174	23043.5652173913	27892.4565217391	25492.9130434783	25847.3260869565	23522.6086956522	22109.4782608696	25132.9130434783	23921.5434782609	22745.7173913044	23522.6086956522	20866.5434782609	21989.1086956522	22109.4782608696	22109.4782608696	23522.6086956522	23785.6086956522	22745.7173913044	20979.3043478261	21989.1086956522	19513.0869565217	17422.8913043478	18908.1739130435	18434.3695652174	17044.0652173913	16841.8695652174	17044.0652173913	17597.0869565217	23019.5281380652	2.00597826932304e-10	down-regulated
TFPI2	3205.71739130435	3274.15217391304	2784.80434782609	2538.54347826087	2749.71739130435	3165.1847826087	2649.05434782609	2569.4347826087	2316.02173913044	3380.66304347826	3662.73913043478	3512.4347826087	2928.4347826087	2797.52173913044	2673.96739130435	3251.02173913044	2501.86956521739	2705.16304347826	2455.47826086957	3114.0652173913	2970.80434782609	2533.30434782609	2807.75	2950.08695652174	2324.9347826087	2393.26086956522	2495.77173913044	2083.02173913044	2353.13043478261	2162.55434782609	2107.32608695652	2016.07608695652	1871.21739130435	2045.61956521739	2631.23913043478	1996.97826086957	1676.98913043478	2045.39130434783	1702.41304347826	1576.48913043478	1559.30434782609	1747.95652173913	1543.47826086957	1868.17391304348	1748.54347826087	2085.6847826087	2468.11927693478	2.018326288863e-10	down-regulated
NCF2	45.0434782608696	41.1739130434783	37.8695652173913	27.8586956521739	35.3586956521739	38.1304347826087	34.5652173913044	30.2934782608696	30.9130434782609	45.5217391304348	53.75	36.9347826086957	47.1739130434783	27.2608695652174	23.9782608695652	39.0434782608696	46.75	43.2934782608696	34.4347826086957	28.0217391304348	52.304347826087	24.2608695652174	30.9347826086957	30.8913043478261	28.695652173913	25.9130434782609	24.3586956521739	15.9565217391304	19.5	20.1086956521739	23.4239130434783	17.4565217391304	15.9782608695652	23.6521739130435	18.3913043478261	8.07608695652174	11.1847826086957	17.8152173913043	13.3586956521739	4.1304347826087	7.17391304347826	10.9130434782609	11.3478260869565	10.1521739130435	9.82608695652174	11.7608695652174	26.8464087826087	2.25286447397078e-10	down-regulated
E2F2	206.010869565217	251.347826086957	208.304347826087	255.804347826087	193.815217391304	265.630434782609	203.391304347826	247.54347826087	119.119565217391	198.04347826087	206.804347826087	261.826086956522	190.521739130435	218	335.5	235.847826086957	200.673913043478	209.934782608696	294.45652173913	196.532608695652	183.391304347826	198.782608695652	194.913043478261	176.815217391304	187.652173913043	192.5	165.369565217391	148.173913043478	178.45652173913	181.04347826087	115.869565217391	110.554347826087	117.75	191.695652173913	101.108695652174	143.630434782609	72.9782608695652	178.54347826087	68.2282608695652	103.04347826087	95.9239130434783	104.804347826087	78.6086956521739	69.8804347826087	49.5	63.5217391304348	173.301037326087	2.25859798207005e-10	down-regulated
SLC25A18	0	1.02173913043478	0.804347826086957	0	0	0	0	0	35.554347826087	1.17391304347826	1.06521739130435	2.95652173913043	31.8913043478261	13.4347826086957	18.804347826087	14.695652173913	25.054347826087	9.1304347826087	18.0434782608696	17.9347826086957	21.8260869565217	21.1739130434783	27.804347826087	25.1847826086957	38.5	25.9130434782609	34.4347826086957	41.4130434782609	29.6086956521739	39.945652173913	42.4021739130435	36	41.3913043478261	6.06521739130435	38.7065217391304	58.7826086956522	48.8804347826087	2.80434782608696	85.8478260869565	68.804347826087	57.0217391304348	59.0869565217391	58.8695652173913	69.8804347826087	47.6086956521739	37.6956521739131	27.3308131478261	2.25859798207005e-10	up-regulated
KLHL20	480.54347826087	523.586956521739	511.586956521739	580.521739130435	502.445652173913	489.021739130435	475	585.847826086957	560.923913043478	486.065217391304	517.728260869565	553.239130434783	530.5	485.847826086957	585.065217391304	524.423913043478	535.336956521739	528.934782608696	620.630434782609	548.673913043478	538.326086956522	616.641304347826	646.173913043478	628.717391304348	627.04347826087	576.608695652174	646.510869565217	628.717391304348	635.391304347826	679.934782608696	627.304347826087	749.108695652174	662.521739130435	663.282608695652	782.695652173913	567.173913043478	718.347826086957	627.630434782609	678.108695652174	760.358695652174	739.04347826087	731.478260869565	588.021739130435	763.076086956522	728.54347826087	768.652173913044	608.811671086957	2.30766495107665e-10	up-regulated
AACS	716.913043478261	577.804347826087	648.184782608696	567.173913043478	650.608695652174	544.260869565217	659.173913043478	535.771739130435	845.760869565218	562.434782608696	703.315217391304	561.989130434783	782.228260869565	642.489130434783	738.717391304348	641.804347826087	747.739130434783	732.891304347826	818.434782608696	727.673913043478	662.847826086957	821.826086956522	765.586956521739	747.413043478261	863.326086956522	812.195652173913	762.45652173913	851.619565217391	817.739130434783	773.836956521739	940.434782608696	962.826086956522	988.782608695652	644.423913043478	895	1035.33695652174	993.152173913044	590.978260869565	1102.19565217391	1101.23913043478	1171.5	999.913043478261	1238.80434782609	1043.72826086957	1018.47826086957	905.804347826087	802.539452652174	2.37361092132114e-10	up-regulated
ADAM17	3794.86956521739	3861.15217391304	3610.26086956522	3858.34782608696	3859.75	3814.47826086957	3742.89130434783	4003.21739130435	3116.58695652174	3830.48913043478	3947.54347826087	4017.63043478261	3343.38043478261	3863.82608695652	3402.90217391304	4045	3466.26086956522	3892.56521739131	3651.10869565217	3787.58695652174	3565.76086956522	3749.76086956522	3540.84782608696	3935.04347826087	3546.61956521739	3353.76086956522	3739.11956521739	3367.26086956522	3164.32608695652	3407.08695652174	3358.39130434783	3156.34782608696	3296.42391304348	2991.34782608696	3148.08695652174	3172.84782608696	3215.79347826087	3325.32608695652	3055.01086956522	3027.9347826087	3011.45652173913	3098	3034.3152173913	3046.84782608696	3081.26086956522	2943.80434782609	3483.53546032609	2.37827194237492e-10	down-regulated
STXBP5	1646.42391304348	1727.21739130435	1748.82608695652	1932.79347826087	2229.53260869565	1856.32608695652	1643.13043478261	2038.33695652174	2521.9347826087	1831.97826086957	1772.45652173913	1977.23913043478	2209.63043478261	1820.65217391304	1801.88043478261	2028.28260869565	2350.76086956522	1751.89130434783	1979.08695652174	2183.15217391304	1982.26086956522	2055.80434782609	2003.71739130435	2099.25	2253.60869565217	2021.39130434783	2489.15217391304	2339.45652173913	2397.91304347826	2528.76086956522	2344.3152173913	2392.14130434783	2466.69565217391	2407.45652173913	2253.21739130435	2316.02173913044	2572.45652173913	2409.38043478261	2718	2532.75	2305.80434782609	2932.5	2467.13043478261	2746.58695652174	2734.60869565217	2921.82608695652	2211.82039136957	2.39188559112017e-10	up-regulated
STAT4	425.619565217391	582.510869565217	539.739130434783	609.586956521739	558.880434782609	655.086956521739	560.771739130435	551.891304347826	698.152173913044	568.826086956522	550.130434782609	534.532608695652	481.75	637.652173913044	580.804347826087	643.173913043478	680.032608695652	557.358695652174	576.086956521739	553.239130434783	578.652173913044	594.304347826087	688.652173913044	576.565217391304	592.152173913044	673.934782608696	590.228260869565	643.336956521739	783.076086956522	751.228260869565	701.978260869565	751.858695652174	901.673913043478	663.282608695652	599.956521739131	739.978260869565	985.326086956522	793.478260869565	991.478260869565	986.902173913044	964.760869565217	772.717391304348	997.695652173913	979.282608695652	925.652173913043	767.695652173913	685.688567956522	2.39188559112017e-10	up-regulated
ADGRB2	212.717391304348	235.5	218.782608695652	238.282608695652	193.021739130435	270.630434782609	225.239130434783	202.673913043478	135.173913043478	155.326086956522	173.95652173913	178.79347826087	164.739130434783	222.065217391304	204.826086956522	204.217391304348	157.326086956522	163	194.586956521739	175.586956521739	138.652173913043	172.565217391304	142.804347826087	141.695652173913	136.934782608696	196.891304347826	143.673913043478	140.815217391304	126.076086956522	156.260869565217	157.728260869565	138.5	120.978260869565	173.630434782609	126.869565217391	148.95652173913	95.4021739130435	192.130434782609	92.3804347826087	129.423913043478	116.967391304348	97.5434782608696	88.6956521739131	65.6847826086957	77.3695652173913	87.9239130434783	159.413043326087	2.40716424261782e-10	down-regulated
DCDC1	326.79347826087	376.782608695652	374.70652173913	369.304347826087	447.260869565217	363.010869565217	359.173913043478	384.695652173913	236.934782608696	385.391304347826	359.576086956522	402.597826086957	203.804347826087	313.347826086957	330.902173913044	358.04347826087	301.95652173913	329.641304347826	292.04347826087	328.054347826087	216.760869565217	336.347826086957	357.75	348.326086956522	294.369565217391	353.608695652174	313.771739130435	267.391304347826	279.913043478261	321.108695652174	224.152173913043	210.978260869565	238.869565217391	288.586956521739	210.260869565217	180.065217391304	229.771739130435	328.782608695652	203.217391304348	123.086956521739	136.489130434783	194.717391304348	142.304347826087	138.434782608696	167.782608695652	193.152173913043	285.739599086957	2.47154577166007e-10	down-regulated
SYT1	2161.21739130435	1736.28260869565	1608.53260869565	1474	1617.02173913044	1591.71739130435	1725.5652173913	1551.65217391304	982.597826086957	1801.27173913044	2006.45652173913	1796.60869565217	1495.52173913043	1458.17391304348	1530.58695652174	1512	1126.39130434783	1552.76086956522	1651.52173913043	1457.34782608696	1338.4347826087	1393.44565217391	1651.17391304348	1453.0652173913	1013.52173913043	1034.95652173913	1053.96739130435	835.021739130435	954.434782608696	1078.55434782609	795.434782608696	851.152173913044	747.5	1193.60869565217	1077.47826086957	778.902173913044	725.467391304348	1123.97826086957	720.228260869565	701.673913043478	707.95652173913	744.652173913044	957.108695652174	882.065217391305	842.913043478261	946.586956521739	1248.70677108696	2.47716670923869e-10	down-regulated
SEMA3E	116.54347826087	142.25	176.45652173913	151.869565217391	148.869565217391	166.934782608696	157.086956521739	171.804347826087	147.945652173913	154.076086956522	199.380434782609	172.684782608696	132.684782608696	170.70652173913	183.065217391304	170.891304347826	196.478260869565	144.20652173913	198.380434782609	147.032608695652	175.521739130435	121.45652173913	174.45652173913	148.95652173913	115.586956521739	139.586956521739	128.336956521739	103.717391304348	95.7826086956522	121.847826086957	70.6521739130435	73.1195652173913	129.478260869565	113.782608695652	83.5869565217391	90.5652173913044	102.45652173913	119.695652173913	57.5217391304348	59.2608695652174	84.4347826086957	91.804347826087	50.5869565217391	78.804347826087	78.4782608695652	73.7391304347826	128.968810673913	2.53646882091487e-10	down-regulated
BCO1	48.804347826087	52.304347826087	46.4021739130435	40.6739130434783	34.4347826086957	48.1304347826087	54.2608695652174	43.8260869565217	17.9130434782609	64.3586956521739	61.5	41.2717391304348	23.0652173913043	48.054347826087	45.4130434782609	31.8695652173913	36.2173913043478	28.4782608695652	41.2826086956522	31.75	40.1086956521739	26.2608695652174	25.195652173913	32.804347826087	20.7065217391304	35.3260869565217	28.7173913043478	12.3260869565217	31.0326086956522	27.8152173913044	17.4565217391304	28.6086956521739	15.0217391304348	29.6086956521739	13.7391304347826	14.2391304347826	20.1521739130435	24.0652173913044	11.0434782608696	11.8913043478261	12.0217391304348	6.89130434782609	14.804347826087	12.1739130434783	10.6739130434783	9.18478260869565	29.8234877173913	2.58140958571799e-10	down-regulated
FER1L4	55.9782608695652	70.8913043478261	116.304347826087	65.9347826086957	116.684782608696	88.0434782608696	82.8913043478261	75.8260869565217	127.097826086957	60.2282608695652	53.75	67.1739130434783	91.9130434782609	71.1956521739131	85.4021739130435	70.6521739130435	72.7826086956522	105.478260869565	76.1956521739131	134.45652173913	90.8695652173913	102.54347826087	83.8913043478261	80.2717391304348	105	96.7826086956522	148	117.923913043478	101.130434782609	136.576086956522	167.79347826087	147.717391304348	157.673913043478	130.934782608696	157.326086956522	168.869565217391	210.173913043478	143.576086956522	166.70652173913	252.326086956522	183.54347826087	176.934782608696	291.152173913044	177.369565217391	186.978260869565	141.565217391304	122.011106847826	2.58986034175172e-10	up-regulated
CD59	10282.7391304348	8442.17391304348	8511.21739130435	8368.19565217392	8638.03260869565	8110.69565217391	8694	8721.9347826087	14551.8260869565	9896.73913043478	10717.8695652174	9935.73913043478	14371.9347826087	9828.78260869565	9533.28260869565	10192.1739130435	12944.0434782609	11186.7391304348	9484.52173913043	10405.8913043478	12715.7391304348	11723.9565217391	11856.4130434783	11856.4130434783	11408.0434782609	11558.2608695652	11577.8913043478	12715.7391304348	12258.8913043478	11449.2173913043	14212.5434782609	12682.9782608696	12535.9782608696	11333.7608695652	15402.7173913043	13733.0652173913	14436.2826086957	10158.8260869565	16674.5217391304	13094.3695652174	14371.9347826087	14940.1304347826	15973.7608695652	16916.0652173913	15452.7391304348	16513.7826086957	11964.6206861522	2.58986034175172e-10	up-regulated
H2AFX	1881.11956521739	1838.23913043478	1790.38043478261	1457.94565217391	1693.0652173913	1751.21739130435	1877.83695652174	1495.10869565217	1923.94565217391	1913.30434782609	1766.47826086957	1559.30434782609	1588.15217391304	1571.51086956522	1554.96739130435	1488.63043478261	1747.35869565217	1641.10869565217	1382.89130434783	1499.6847826087	2064.72826086957	1503.54347826087	1613.0652173913	1531.36956521739	1640.58695652174	1839.91304347826	1480.9347826087	1758.0652173913	1596.41304347826	1371.65217391304	1501.1847826087	1248.04347826087	1257.54347826087	1160.19565217391	1126.53260869565	1564.45652173913	1254.15217391304	1295.85869565217	1132.89130434783	939.076086956522	1071.01086956522	1173	884.195652173913	913.54347826087	897.989130434783	974.521739130435	1482.9721168913	2.58986034175172e-10	down-regulated
PLK4	1149.97826086957	1307.13043478261	1157.0652173913	1285.45652173913	1193.01086956522	1349.61956521739	1042.5	1341.83695652174	1039.47826086957	1245.89130434783	1336.57608695652	1378.22826086957	1063.35869565217	1112.60869565217	1168	1479.76086956522	1258.3152173913	1025.15217391304	1047.04347826087	1417.04347826087	1155.08695652174	1016.79347826087	1087.54347826087	1325.1847826087	1093.63043478261	964.228260869565	1321.44565217391	951.510869565217	1123.36956521739	1144.04347826087	885.336956521739	843.239130434783	834.804347826087	1097.95652173913	782.695652173913	810	848.826086956522	1170.89130434783	732.45652173913	632.608695652174	642.923913043478	881.369565217391	535.565217391304	686.478260869565	623.217391304348	718.119565217391	1050.16042923913	2.59984634912916e-10	down-regulated
KCNH1	447.065217391304	345.804347826087	477.630434782609	552.771739130435	473.586956521739	340.586956521739	434.565217391304	620.913043478261	290.652173913044	514.880434782609	561.45652173913	614.913043478261	345.869565217391	516.978260869565	697.913043478261	622.684782608696	337.391304347826	351.978260869565	523.586956521739	434.565217391304	516.782608695652	316.282608695652	316.695652173913	328.54347826087	244.782608695652	291.336956521739	295.326086956522	184.673913043478	240.304347826087	229.826086956522	137.195652173913	136.304347826087	161.565217391304	335.326086956522	169.336956521739	109.978260869565	146.217391304348	292.923913043478	132.173913043478	88.5217391304348	143.010869565217	165.695652173913	140.239130434783	75.2826086956522	89.1739130434783	159.076086956522	325.05151	2.77186834724587e-10	down-regulated
ORAI2	623.217391304348	516.032608695652	491.630434782609	377.70652173913	541.847826086957	532.608695652174	570.282608695652	367.239130434783	428.45652173913	536.021739130435	490.989130434783	483.804347826087	518.978260869565	526.673913043478	397.565217391304	436.79347826087	469.380434782609	481.173913043478	409.804347826087	407.413043478261	492.913043478261	435.20652173913	400.565217391304	356.086956521739	340.641304347826	363.010869565217	325.826086956522	383.402173913044	327.630434782609	309.5	350.586956521739	325.478260869565	336.630434782609	353.29347826087	426.478260869565	370.130434782609	291.173913043478	311.239130434783	270.369565217391	304.673913043478	278.847826086957	253.945652173913	326.315217391304	280.326086956522	252.326086956522	278.304347826087	398.967859565217	2.80458793118888e-10	down-regulated
GOLPH3	4408.52173913044	4457.13043478261	3775.32608695652	4137.36956521739	4171.4347826087	4102.1847826087	4284.21739130435	4357.17391304348	7190.04347826087	4753.47826086957	4871.13043478261	4371.28260869565	6974.73913043478	5540.47826086957	5210.97826086957	4819.13043478261	6695.21739130435	6214.23913043478	5634.19565217391	5597.30434782609	5967.15217391304	6724.08695652174	6791	6132.0652173913	6861.69565217391	6657.97826086957	7060.86956521739	7087.82608695652	7010.73913043478	6702.13043478261	7087.82608695652	7588.78260869565	7281.19565217391	5584.63043478261	7903.30434782609	7561.91304347826	7215.76086956522	5255	7491.26086956522	7323.47826086957	7281.19565217391	7966.67391304348	7760.34782608696	8156.17391304348	7406.36956521739	7932.76086956522	6203.43030908696	2.88970228948905e-10	up-regulated
PISD	453.913043478261	470.902173913044	430.717391304348	448.369565217391	387.45652173913	438.978260869565	488.521739130435	389.239130434783	883.456521739131	468.25	384.75	450.565217391304	786.891304347826	556.108695652174	571.760869565217	570.978260869565	623.5	582.717391304348	632.608695652174	519.891304347826	576.695652173913	606.597826086957	560.978260869565	630.695652173913	641.076086956522	745.586956521739	524.239130434783	728.282608695652	770.054347826087	699.891304347826	840.695652173913	702.04347826087	767.815217391304	641.608695652174	863.45652173913	902.543478260869	983.576086956522	498.760869565217	1031.3152173913	1155.08695652174	1215.05434782609	734.956521739131	1435.97826086957	1009.0652173913	1076.45652173913	873.130434782609	690.330808695652	2.88970228948905e-10	up-regulated
KSR2	295.782608695652	252.739130434783	189.510869565217	216.934782608696	243.195652173913	214.086956521739	151.260869565217	249.282608695652	170.532608695652	235.891304347826	266.326086956522	243.989130434783	270.630434782609	273.815217391304	356	238.5	212.826086956522	241.315217391304	360.282608695652	241.217391304348	234.565217391304	247.891304347826	238.5	207.054347826087	192.869565217391	230.282608695652	194.478260869565	160.5	126.076086956522	146.521739130435	119.021739130435	117.79347826087	87.304347826087	133.565217391304	151	93.9239130434783	77.0434782608696	125.326086956522	57.5217391304348	73.6956521739131	75.1304347826087	85.2826086956522	60.8478260869565	54.804347826087	45.2173913043478	98.6304347826087	181.716683130435	2.92334416829728e-10	down-regulated
WDR62	1067.3152173913	1034.95652173913	1092.84782608696	929.945652173913	1107.83695652174	1003.48913043478	1110.94565217391	979.413043478261	1058.54347826087	1039.15217391304	1157.77173913044	972.934782608696	1130.42391304348	1109.01086956522	921.652173913044	1050.98913043478	1018.3152173913	1214.45652173913	981.521739130435	1058.22826086957	1116.39130434783	1108.82608695652	959.95652173913	943.95652173913	961.804347826087	900.29347826087	1072.8152173913	970.173913043478	872.695652173913	866.826086956522	947.576086956522	824.184782608696	841.108695652174	946.423913043478	867.04347826087	1081.29347826087	830.456521739131	928.065217391304	720.228260869565	731.934782608696	726.5	643.173913043478	713.369565217391	658.021739130435	621.79347826087	616.717391304348	945.899563021739	3.1490112319514e-10	down-regulated
PARPBP	2658.75	2752.23913043478	2579.67391304348	2797.52173913044	2666.41304347826	2839.84782608696	2544.39130434783	2609.58695652174	2489.15217391304	2719.33695652174	2429.26086956522	2570.45652173913	2248.57608695652	2491.5	2305.80434782609	2736.95652173913	2429.67391304348	2396.80434782609	2119.76086956522	2520.02173913044	2621.90217391304	2428.6847826087	2342.25	2490.08695652174	2200.5	2190.15217391304	2169.0652173913	2114.86956521739	2434.78260869565	2576.21739130435	2150.66304347826	1970.5	2102.39130434783	2666.41304347826	2152.63043478261	1855.97826086957	1980.8152173913	2593.80434782609	1943.86956521739	1769.32608695652	1836.54347826087	2095.0652173913	1666.76086956522	1810.55434782609	1591.32608695652	2034.82608695652	2319.47189980435	3.16766920537637e-10	down-regulated
LHX2	157.402173913044	167.434782608696	116.304347826087	152.5	133.521739130435	168.163043478261	137.434782608696	142.130434782609	79.4456521739131	154.076086956522	106.152173913043	157.282608695652	125.20652173913	130.79347826087	166.239130434783	113.326086956522	98.1956521739131	132.45652173913	133.95652173913	121.097826086957	134.239130434783	139.021739130435	83.8913043478261	113.04347826087	102.195652173913	115.086956521739	110.141304347826	93.1521739130435	94.1956521739131	106.554347826087	75.4891304347826	86.6521739130435	80.8804347826087	117.815217391304	86	70.9021739130435	71.8260869565217	109.065217391304	80.8804347826087	61.9130434782609	67	83.3478260869565	62.8478260869565	70.9347826086957	46.4239130434783	74.7608695652174	109.377833391304	3.16766920537637e-10	down-regulated
KCTD15	2093.5	2236.79347826087	2262.36956521739	1782.89130434783	2336.0652173913	2132.0652173913	2258.63043478261	1745.69565217391	1593.54347826087	2032.9347826087	2095.54347826087	1779.80434782609	1427.41304347826	1807.9347826087	1833.95652173913	1723.22826086957	1600.28260869565	1759.15217391304	1546.09782608696	1702.97826086957	1663.8152173913	1648.91304347826	1563.41304347826	1495.10869565217	1657.47826086957	1656.52173913043	1692.19565217391	1542.5	1543.78260869565	1475.10869565217	1503.54347826087	1400.73913043478	1512.4347826087	1350.13043478261	1203.15217391304	1416.3152173913	1397.1847826087	1719.13043478261	1479.90217391304	1350.13043478261	1291.13043478261	1302.05434782609	1304.82608695652	1303.15217391304	1269.07608695652	1168.28260869565	1644.80216445652	3.16766920537637e-10	down-regulated
CCDC80	5240.95652173913	4498.78260869565	5283.47826086957	4952.78260869565	6558.73913043478	4865.35869565217	4905.02173913044	4875.4347826087	7718.32608695652	4880.86956521739	5564.38043478261	5779.28260869565	7136.17391304348	5807.84782608696	6080.45652173913	6169.86956521739	7741.39130434783	5362.76086956522	6100.39130434783	6140.70652173913	6745.97826086957	5544.80434782609	5973.28260869565	6423.36956521739	6567.78260869565	6718.32608695652	7461.82608695652	6543.08695652174	6515.78260869565	6903.30434782609	7329.89130434783	6765.51086956522	8302.02173913044	6411.15217391304	7674.19565217391	6822.58695652174	7569.26086956522	6590.63043478261	8470.13043478261	7913.97826086957	8386.25	8801.19565217392	9241.65217391304	7312.72826086957	9258.02173913043	8315.08695652174	6657.06191878261	3.17104458735932e-10	up-regulated
MGME1	1739.52173913044	1891.46739130435	1617.80434782609	1676.98913043478	1850.32608695652	1964.60869565217	1760.60869565217	1710.9347826087	1709.84782608696	1999.97826086957	1849.54347826087	1636.47826086957	1729.21739130435	1975.86956521739	1959.3152173913	1542.08695652174	1799.21739130435	1966.32608695652	1799.21739130435	1562.76086956522	1948.08695652174	1980.22826086957	1781.63043478261	1486.39130434783	1627.60869565217	1738.39130434783	1517.1847826087	1594.32608695652	1491.08695652174	1457.71739130435	1536.41304347826	1492.0652173913	1326.05434782609	1452.82608695652	1667.91304347826	1511.0652173913	1543.17391304348	1466.86956521739	1196.92391304348	1332.39130434783	1283.94565217391	1218.52173913043	1115.96739130435	1208.28260869565	1166.63043478261	1167.26086956522	1609.80597919565	3.18601364410547e-10	down-regulated
SLC25A20	356.391304347826	359.260869565217	324.108695652174	384.891304347826	305.760869565217	351.978260869565	345.326086956522	378.065217391304	391.04347826087	290.326086956522	355.5	314.913043478261	398.652173913044	337	345.260869565217	348.586956521739	375.782608695652	364.565217391304	318.5	313.489130434783	356.04347826087	343.260869565217	312.739130434783	379.20652173913	366.108695652174	404.891304347826	380.108695652174	359.869565217391	410.913043478261	399.271739130435	461.663043478261	479.130434782609	423.630434782609	380.20652173913	497.108695652174	385.108695652174	467.934782608696	398.010869565217	464.54347826087	451.326086956522	509.152173913044	537.086956521739	514.652173913044	467.847826086957	481.75	607.45652173913	395.617913173913	3.20752895027044e-10	up-regulated
NCAPD3	1625.91304347826	1918.38043478261	1966.02173913044	2229.95652173913	1920.58695652174	1951.80434782609	1868.17391304348	2397.91304347826	1609.70652173913	2066.98913043478	2235.95652173913	2047.89130434783	1575.20652173913	1992.57608695652	2033.75	1926.30434782609	1773.54347826087	1819.21739130435	1922.28260869565	1829.30434782609	1692.69565217391	1750.34782608696	1868.17391304348	1760.60869565217	1805.11956521739	1807.58695652174	2089	1670.73913043478	1660.65217391304	1731.86956521739	1408.14130434783	1616.10869565217	1550.95652173913	1683.39130434783	1339.59782608696	1406.60869565217	1344.65217391304	1851.0652173913	1214.82608695652	1347.54347826087	1291.13043478261	1715.34782608696	1083.54347826087	1161.83695652174	1197.61956521739	1200	1716.53565406522	3.25309817911481e-10	down-regulated
SLC22A15	38.9347826086957	44.8478260869565	37.8695652173913	49.0217391304348	38.8260869565217	46.5652173913044	39.5869565217391	52.3913043478261	62.2173913043478	32	47.3478260869565	44.0978260869565	50.7608695652174	35.2608695652174	63.9130434782609	56.2173913043478	52.304347826087	56.0652173913044	39.0434782608696	55.6630434782609	72.804347826087	72.5434782608696	67.4565217391304	50.7282608695652	69.7173913043478	56.3152173913043	62.9782608695652	65.8478260869565	59.9130434782609	67.9347826086957	63.6086956521739	74.0217391304348	75.9565217391304	64.25	56.1195652173913	68.9565217391304	74	58.8913043478261	78.4130434782609	69.7391304347826	65.6521739130435	85.2826086956522	69.75	89.2826086956522	95.9565217391304	84.304347826087	60.0730148913044	3.2586258319916e-10	up-regulated
RHBDL3	165.130434782609	180.608695652174	143.282608695652	153.54347826087	184.152173913043	150.771739130435	168.163043478261	157.5	123.739130434783	156.717391304348	179.619565217391	188.521739130435	117.95652173913	220.847826086957	242.826086956522	210.608695652174	130.586956521739	192.54347826087	222.826086956522	201	130.79347826087	182	154.347826086957	169.434782608696	168.130434782609	148.217391304348	146.326086956522	123.489130434783	121.326086956522	117.804347826087	86.0869565217391	98.7608695652174	60.6521739130435	86.4565217391304	57.4565217391304	87.1521739130435	70.6521739130435	118.521739130435	66.0652173913044	59.2608695652174	70.4673913043478	64.9673913043478	57.5652173913043	40.8260869565217	31.0326086956522	57.5434782608696	131.875707608696	3.25930782594416e-10	down-regulated
SFRP5	6.80434782608696	3.04347826086957	0	2.3695652173913	0.673913043478261	0	1.17391304347826	1.02173913043478	43.054347826087	2.43478260869565	4.65217391304348	5.93478260869565	30.6739130434783	13.4347826086957	11.3478260869565	5.91304347826087	17.9782608695652	20.9565217391304	12.2608695652174	17.9347826086957	7.52173913043478	40.1086956521739	29.9782608695652	24.1304347826087	30.4782608695652	31.6521739130435	31.4239130434783	40.4782608695652	24.3260869565217	35	43.6086956521739	37.7391304347826	39.0434782608696	7.08695652173913	64.3260869565217	53.5652173913044	42.5	6.6304347826087	71.2608695652174	60.9347826086957	48.8695652173913	50.5	72.0869565217391	63.4673913043478	42.1630434782609	44.7391304347826	27.0713611521739	3.27390111903372e-10	up-regulated
TEF	92.2391304347826	79.3586956521739	73.1195652173913	87.75	78.804347826087	84.6521739130435	70.7608695652174	88.6956521739131	125.108695652174	74.5326086956522	49.4673913043478	86.1521739130435	90.6739130434783	102.076086956522	91.9565217391304	108.54347826087	99.1413043478261	121.152173913044	77.7282608695652	110.608695652174	111.304347826087	90.0217391304348	96.804347826087	109.173913043478	98.8260869565217	111.434782608696	136.608695652174	137.576086956522	155.923913043478	139.413043478261	117.054347826087	131.869565217391	134.760869565217	127.54347826087	147.45652173913	148.086956521739	154.913043478261	153.086956521739	157.369565217391	159.413043478261	127.79347826087	152.95652173913	167.923913043478	141.847826086957	134.45652173913	121.565217391304	114.297969891304	3.36906214501432e-10	up-regulated
TNFAIP8	866.826086956522	946.423913043478	1026.36956521739	1010.5	980.076086956522	988.70652173913	1066.29347826087	993.315217391304	637.391304347826	1112.27173913044	1074.70652173913	1051.52173913043	595.391304347826	788.5	739.978260869565	882.391304347826	730.413043478261	703.054347826087	682.021739130435	885.956521739131	767.108695652174	695.847826086957	708.673913043478	875.641304347826	712.869565217391	663.347826086957	784.163043478261	739.04347826087	662.054347826087	697.673913043478	602.608695652174	697.076086956522	730.413043478261	615.163043478261	515.54347826087	490.989130434783	641.413043478261	591.880434782609	500.076086956522	443.065217391304	490.880434782609	600.880434782609	488.521739130435	610.717391304348	553.782608695652	558.021739130435	743.46882023913	3.59900037372277e-10	down-regulated
PHF8	588.260869565217	723.804347826087	776.554347826087	731.652173913044	713.95652173913	630.619565217391	710.304347826087	739.673913043478	760.065217391304	698.152173913044	662.630434782609	676.771739130435	718.902173913044	716.076086956522	729.402173913044	704.021739130435	724.978260869565	743.108695652174	760.358695652174	674.45652173913	622	867.04347826087	821.108695652174	709.173913043478	896.706521739131	893.217391304348	770.29347826087	895.260869565218	911.423913043478	891.336956521739	838.771739130435	981.521739130435	999.260869565217	803.521739130435	998.347826086957	1023.40217391304	980.076086956522	774	908.554347826087	1018.15217391304	982.130434782609	981.065217391304	1045.95652173913	964.228260869565	901	892.173913043478	816.379960630435	3.69935952262316e-10	up-regulated
STX12	677.826086956522	689.326086956522	601.434782608696	671.586956521739	608.119565217391	734.326086956522	712.586956521739	671.217391304348	758.869565217391	778.902173913044	601.586956521739	664.521739130435	697.576086956522	578.54347826087	610.880434782609	626.239130434783	702.413043478261	614	598.478260869565	676.652173913044	684.826086956522	679.434782608696	696.423913043478	745.29347826087	681.217391304348	663.347826086957	738.239130434783	683.260869565217	721.304347826087	746.130434782609	810.804347826087	793.79347826087	902.347826086956	801.989130434783	879.782608695652	719.5	889.913043478261	813.239130434783	822.456521739131	855.673913043478	849.804347826087	863.891304347826	866.684782608696	993.782608695652	945.206521739131	1038.19565217391	742.644137695652	3.7221366568243e-10	up-regulated
PAPSS2	3731.10869565217	3558.21739130435	3426.36956521739	2768.39130434783	3142.84782608696	3244.52173913044	3672.98913043478	2807.10869565217	2601.73913043478	2780.47826086957	2850.97826086957	3451.5	3362.3152173913	2766.14130434783	3078.02173913044	3242.5	3148.80434782609	2940.97826086957	2940.97826086957	3191.13043478261	3332.73913043478	2865.20652173913	3057.91304347826	2964.63043478261	2374.08695652174	2620.84782608696	2691.5	2282.40217391304	2376.58695652174	2296.52173913044	2509.09782608696	2317.30434782609	2426.41304347826	2510.13043478261	2870.03260869565	2291.04347826087	2450.71739130435	2597.46739130435	1895.3152173913	1965.39130434783	2086.35869565217	1865.10869565217	2125.51086956522	2125.51086956522	2226.03260869565	2339.45652173913	2742.83575615217	3.7238286574695e-10	down-regulated
ESCO2	2150.66304347826	2348.21739130435	2121.30434782609	2525.17391304348	2188.08695652174	2429.26086956522	2147.9347826087	2625.25	1512.21739130435	2224.73913043478	2122.9347826087	2559.13043478261	1671.0652173913	2094.08695652174	2026.80434782609	2461.54347826087	2039.97826086957	1798.84782608696	1838.95652173913	2262.36956521739	1906.07608695652	1781.36956521739	1818.91304347826	2239.55434782609	1820.65217391304	1792.97826086957	2097.5652173913	1646.98913043478	1804.54347826087	2020.26086956522	1332.61956521739	1511.0652173913	1530.58695652174	2040.54347826087	1234.66304347826	1278.60869565217	1360.82608695652	2243.1847826087	1220.90217391304	1248.04347826087	1152.44565217391	1726.58695652174	879.217391304348	1078.4347826087	995.891304347826	1306.97826086957	1830.82749347826	3.80480574400449e-10	down-regulated
IL17RC	316.565217391304	303.347826086957	347.978260869565	233.739130434783	318.326086956522	303.239130434783	336.739130434783	256.434782608696	630.619565217391	338.630434782609	327.141304347826	234.608695652174	492.847826086957	509.79347826087	491.369565217391	367.684782608696	533.347826086957	540.956521739131	539.739130434783	401.304347826087	494.130434782609	617.630434782609	470.75	425	584.29347826087	609.684782608696	469.04347826087	700.978260869565	564.065217391304	548.5	765.5	776.717391304348	820.04347826087	393.065217391304	751.391304347826	880.423913043478	844.173913043478	379.804347826087	933.913043478261	1194.8152173913	1127.78260869565	594.228260869565	1160.89130434783	868.413043478261	895.586956521739	656.260869565217	572.858691043478	3.83177065781762e-10	up-regulated
BBS12	192.95652173913	188.826086956522	200.978260869565	204.79347826087	157.282608695652	150.771739130435	172.760869565217	204.04347826087	195.29347826087	183.239130434783	192.413043478261	201.413043478261	181.902173913044	178.45652173913	160.5	210.608695652174	166.978260869565	177.217391304348	149.673913043478	169.260869565217	180.195652173913	192.347826086957	186.891304347826	172.282608695652	179.239130434783	176.54347826087	182.445652173913	208.586956521739	193.54347826087	190.934782608696	213.326086956522	233.260869565217	215.978260869565	237.239130434783	242.282608695652	196.478260869565	280.239130434783	242	276.70652173913	317.652173913044	282.782608695652	285.45652173913	315.402173913044	304.978260869565	261.978260869565	315.717391304348	211.388235804348	3.93042787626954e-10	up-regulated
PEX11B	396.79347826087	409.717391304348	422.239130434783	424.369565217391	389.869565217391	384.597826086957	367.20652173913	447.5	656.652173913044	401.847826086957	498.217391304348	420.565217391304	570.369565217391	547.717391304348	585.065217391304	442.978260869565	625.152173913044	569.347826086957	703.717391304348	468.717391304348	509.065217391304	610.532608695652	712.282608695652	542.967391304348	701.478260869565	722.608695652174	700.717391304348	761.239130434783	756.195652173913	698.673913043478	608.54347826087	744.065217391304	760.739130434783	624.467391304348	720.608695652174	736.576086956522	821.673913043478	485.304347826087	706.423913043478	857.195652173913	922.217391304348	757.913043478261	823.065217391304	777.95652173913	769.260869565218	736.576086956522	615.238895282609	4.43239519884356e-10	up-regulated
GPD2	5138.39130434783	5524.76086956522	5295.9347826087	5822.0652173913	5250.26086956522	5222.45652173913	5182.45652173913	5801.60869565217	4387.21739130435	5165.63043478261	5472.55434782609	5725.45652173913	4825.54347826087	4936.41304347826	5474.52173913044	5697.52173913044	5058.67391304348	4559.47826086957	5343.21739130435	5474.52173913044	4740.91304347826	4990.0652173913	5075.60869565217	5638.60869565217	4859.52173913044	4869.03260869565	5405.91304347826	4346.65217391304	4776.82608695652	5284.98913043478	3900.58695652174	4112.82608695652	4108.57608695652	5245.47826086957	4080.54347826087	3433.32608695652	3778.96739130435	5118.19565217391	3700.5652173913	3223.25	3341.73913043478	4236.13043478261	3126.39130434783	3291.91304347826	3426.36956521739	4213.13043478261	4732.27837806522	4.71690291771034e-10	down-regulated
SLC25A12	705.891304347826	745.586956521739	759.217391304348	811.413043478261	726.565217391304	738.913043478261	662.95652173913	816.315217391304	818.586956521739	722.5	767.326086956522	753.717391304348	704.95652173913	649.804347826087	694.891304347826	820.891304347826	793.79347826087	628.445652173913	664.260869565218	788.5	714.5	709.173913043478	825.173913043478	839.434782608696	821.239130434783	766.097826086957	870.826086956522	808.760869565217	941.978260869565	897.989130434783	926.5	951.95652173913	1047.19565217391	823.173913043478	854.347826086957	883.782608695652	1097.19565217391	882.663043478261	1048.21739130435	894.130434782609	992.097826086957	1189.28260869565	948.141304347826	1139.25	1123.36956521739	1066.86956521739	844.301746304348	4.9044690136655e-10	up-regulated
CDH6	24.5760869565217	50.6739130434783	46.4021739130435	28.7391304347826	37.8913043478261	33.8913043478261	33.8586956521739	30.2934782608696	11.7826086956522	38.695652173913	33.1086956521739	32.9021739130435	14.6739130434783	20.445652173913	31.3478260869565	31.8695652173913	11.2608695652174	16.1086956521739	32	19.9130434782609	24.0652173913044	22.2173913043478	27.804347826087	17.195652173913	13.0869565217391	12.9347826086957	8.86956521739131	6.06521739130435	4.73913043478261	10.3478260869565	2.17391304347826	2.58695652173913	7.39130434782609	9.97826086956522	12.6086956521739	8.07608695652174	9.08695652173913	7.67391304347826	3.71739130434783	3.08695652173913	6	3.91304347826087	3.43478260869565	6	6.84782608695652	4.95652173913044	17.9411624347826	5.00062714420689e-10	down-regulated
KLF9	112.45652173913	140.815217391304	162.086956521739	138.086956521739	177.369565217391	304.782608695652	196.934782608696	138.336956521739	648.304347826087	364.391304347826	288.652173913044	332.695652173913	553.434782608696	677.619565217391	560.869565217391	626.239130434783	880.663043478261	784.673913043478	714.173913043478	824.75	586.304347826087	934.891304347826	783.739130434783	829.347826086957	972.663043478261	898.391304347826	815.478260869565	913.913043478261	1007.8152173913	1064.5652173913	931.804347826087	1134.88043478261	1272.08695652174	656.891304347826	756.315217391304	747.326086956522	1257.54347826087	556.989130434783	1208.89130434783	983.108695652174	1158.92391304348	1173	815.336956521739	1181.86956521739	1361.82608695652	1136.96739130435	734.091442369565	5.00130290274857e-10	up-regulated
UHRF1	1060.84782608696	1037.84782608696	1082.35869565217	885.826086956522	1235.5	1034.60869565217	1233.47826086957	842	1220.32608695652	1216.32608695652	1053.80434782609	1059.91304347826	1348.8152173913	1456.65217391304	1268.86956521739	1117.65217391304	1319.84782608696	1342.89130434783	1144.96739130435	1068.42391304348	1389.26086956522	1181.63043478261	1098.91304347826	934.760869565218	1041.82608695652	1039.3152173913	805.130434782609	883.978260869565	855.673913043478	843.130434782609	827.358695652174	738.586956521739	778.304347826087	691.010869565217	764.967391304348	785.065217391304	656.891304347826	702.586956521739	698.54347826087	604.869565217391	585.847826086957	535.04347826087	596.760869565217	483.804347826087	436.347826086957	433.934782608696	944.010874978261	5.00396372579379e-10	down-regulated
INTS7	2439.39130434783	2456.28260869565	2151.46739130435	2432.23913043478	2338.78260869565	2395.0652173913	2226.86956521739	2639.23913043478	2101.96739130435	2649.05434782609	2821.91304347826	2511.03260869565	2197.97826086957	2236.79347826087	2380.26086956522	2229.10869565217	2321.60869565217	2142.65217391304	2321.60869565217	2398.60869565217	2419.45652173913	2071.15217391304	2395.5	2236.32608695652	2025.17391304348	2173.97826086957	2160.0652173913	2049.41304347826	2317.30434782609	2239.19565217391	1868.17391304348	1689.19565217391	1788.52173913044	2127.30434782609	1929.36956521739	1612.4347826087	1797.58695652174	2223.0652173913	1644.52173913043	1391.1847826087	1568.89130434783	1967.38043478261	1405.85869565217	1702.97826086957	1686.91304347826	1936.69565217391	2126.51230717391	5.00764477289368e-10	down-regulated
AFF1	2070.39130434783	2105.66304347826	2452.30434782609	2287.9347826087	2527.77173913044	2194.34782608696	1991.36956521739	2416.63043478261	2443.5652173913	2484.0652173913	2304.78260869565	2339.88043478261	2104.19565217391	2244.92391304348	2094.57608695652	2455	2246.40217391304	2512.84782608696	2484.58695652174	2969.19565217391	1883.3152173913	2768.39130434783	2672.70652173913	2959.4347826087	3157.11956521739	2727.80434782609	3454.4347826087	2826.26086956522	2752.23913043478	3053.10869565217	2790.94565217391	3285.97826086957	3057.0652173913	2786.72826086957	2820.52173913044	3122.26086956522	2995.19565217391	2837.84782608696	2948.59782608696	3239.76086956522	2673.19565217391	4016.5	3337.47826086957	3524.45652173913	3794.86956521739	3971.08695652174	2743.21174006522	5.0386808785164e-10	up-regulated
ARFGAP3	872.304347826087	888.04347826087	841.869565217391	1081.65217391304	804.304347826087	1010.94565217391	863.673913043478	1175.64130434783	997.380434782609	862.695652173913	936.369565217391	975.239130434783	1022.60869565217	906.097826086956	975.804347826087	1002.67391304348	979.413043478261	1084.08695652174	1077.94565217391	1026.28260869565	855.673913043478	1153.89130434783	1075.13043478261	1219	1119.25	967.673913043478	1122.59782608696	1028.84782608696	1051.52173913043	1161.65217391304	1242.64130434783	1318.8152173913	1189.63043478261	1315.03260869565	1422.32608695652	1232.10869565217	1352	1187.86956521739	1235.03260869565	1351.84782608696	1366.89130434783	1377.54347826087	1137.47826086957	1330.69565217391	1309.47826086957	1408.36956521739	1106.91376943478	5.19547723717098e-10	up-regulated
TBC1D2B	993.315217391304	1018.58695652174	1091.36956521739	964.608695652174	989.923913043478	994.184782608696	1066.29347826087	1069.91304347826	1517.47826086957	1103.51086956522	930.456521739131	946.260869565217	1645.9347826087	1344.28260869565	1301.86956521739	1157.58695652174	1423.92391304348	1559.30434782609	1601.4347826087	1287.32608695652	1228.32608695652	1720.3152173913	1585.79347826087	1454.27173913043	1740.71739130435	1736.5652173913	1599.36956521739	1773.80434782609	1625.19565217391	1567.97826086957	1652.13043478261	1848.54347826087	1841.94565217391	1555.82608695652	2012.84782608696	1931.63043478261	1813.07608695652	1398.9347826087	1657.02173913043	2274.02173913044	2013.22826086957	1547.64130434783	2134.67391304348	1894.23913043478	1807.58695652174	1650.63043478261	1501.60610943478	5.38624541561992e-10	up-regulated
PTPRG	543.04347826087	608.54347826087	668.369565217391	802.456521739131	801.75	638.782608695652	559.815217391304	818.869565217391	642.923913043478	629.619565217391	683.467391304348	751.684782608696	628.717391304348	575.75	716.391304347826	719.097826086957	576.836956521739	653.347826086957	715.45652173913	811.413043478261	590	671.282608695652	702.586956521739	822.217391304348	733.29347826087	730.282608695652	869.565217391304	669.771739130435	823.597826086957	858.467391304348	830.456521739131	879.336956521739	912.413043478261	784.565217391304	851.45652173913	829.95652173913	884.195652173913	808.217391304348	985.20652173913	922.369565217391	914.815217391304	1141.84782608696	1042.5	939.358695652174	1068.79347826087	1092.84782608696	780.559534652174	5.45233228022588e-10	up-regulated
DNA2	1587.89130434783	1967.73913043478	1840.26086956522	2262.01086956522	1885.60869565217	2023.95652173913	1663.26086956522	2212	1360.95652173913	1966.32608695652	2019.29347826087	2133.42391304348	1413.47826086957	1747.95652173913	1985.76086956522	2245.34782608696	1787.89130434783	1652.39130434783	1986.13043478261	2031.39130434783	1782.89130434783	1740.45652173913	1733.83695652174	1903.10869565217	1641.47826086957	1625.91304347826	1652.58695652174	1391.66304347826	1600.91304347826	1814.77173913043	1159.69565217391	1418.41304347826	1207.95652173913	1648.91304347826	1098.61956521739	1043.39130434783	1199.05434782609	1886.97826086957	990.108695652174	1053.96739130435	1041.28260869565	1353.58695652174	818.739130434783	980.565217391304	1004.33695652174	1099.09782608696	1601.42177919565	5.48164192620633e-10	down-regulated
LONP2	3716.86956521739	3872.41304347826	4190.5652173913	4008.97826086957	3942.47826086957	3943.55434782609	4232.95652173913	3881.1847826087	4190.5652173913	3597.17391304348	3437.39130434783	3551.41304347826	4158.91304347826	4364.45652173913	4110.15217391304	3594.84782608696	3763.58695652174	4364.45652173913	4117.60869565217	3523.41304347826	3569.16304347826	4447.78260869565	4186.13043478261	3698.41304347826	4281.19565217391	4486.39130434783	3636.78260869565	4648.86956521739	4243.95652173913	4262.0652173913	5089.94565217391	5259.08695652174	5993.06521739131	4659.67391304348	5267.39130434783	6037.19565217391	6233.13043478261	4352.30434782609	5801.60869565217	6319.41304347826	6403.80434782609	5132.21739130435	6288.41304347826	5615.17391304348	5933.15217391304	4999.41304347826	4552.3634063913	5.59796456594549e-10	up-regulated
PNRC1	743.880434782609	747.413043478261	631	640.206521739131	1009.80434782609	1119.13043478261	969.869565217391	516.413043478261	1225.10869565217	1291.60869565217	1185.41304347826	1440.02173913043	1130.42391304348	1039.07608695652	873.021739130435	1396.5	1030.03260869565	995.891304347826	787.945652173913	1319.4347826087	908.195652173913	1302.23913043478	1162.66304347826	1466.08695652174	1422.89130434783	1217.54347826087	1593.54347826087	1506.45652173913	1378.91304347826	1545.26086956522	1695.94565217391	1670.46739130435	1627.30434782609	1144.86956521739	1493.65217391304	1523.03260869565	1634.76086956522	1168.28260869565	1802.15217391304	1572.82608695652	1521.59782608696	1554.67391304348	1786.91304347826	2050.08695652174	2115.76086956522	1750.71739130435	1298.02247491304	5.59951150083928e-10	up-regulated
SLC45A4	949.521739130435	1208.28260869565	1208.11956521739	1080.34782608696	1122.76086956522	1298.84782608696	1097.95652173913	1058.08695652174	3207.52173913044	1193.75	1141.61956521739	1104.45652173913	2395.94565217391	2277.15217391304	2375.63043478261	1759.63043478261	2414.5652173913	2751.59782608696	2690.54347826087	2530.76086956522	1800.30434782609	3184.39130434783	2860.20652173913	2960.5	3690.09782608696	4027.9347826087	3409.17391304348	3849.21739130435	3808.13043478261	3782.76086956522	4068.61956521739	4513.02173913044	4704.17391304348	3007.94565217391	3715.80434782609	4450.80434782609	4110.15217391304	2711.80434782609	4150.91304347826	5276.77173913044	4726.08695652174	3386.34782608696	4686.4347826087	3597.17391304348	3619.32608695652	3181.17391304348	2872.74717486957	5.838273181903e-10	up-regulated
ATG4A	263.739130434783	230.434782608696	235.869565217391	279.20652173913	209.695652173913	227.565217391304	222.445652173913	324.434782608696	315.510869565217	197.065217391304	285.891304347826	273.652173913044	321.913043478261	208.032608695652	242.826086956522	243.358695652174	245.95652173913	217.021739130435	219.858695652174	265.380434782609	221.760869565217	252.641304347826	285.597826086957	294.967391304348	261.521739130435	231.728260869565	293.967391304348	267.391304347826	279.913043478261	324.076086956522	352.869565217391	308.728260869565	362.5	320.717391304348	473.880434782609	334.260869565217	408.804347826087	307.228260869565	431.826086956522	366.717391304348	382.217391304348	441.586956521739	419.086956521739	422.04347826087	437.739130434783	531.521739130435	305.329397695652	5.97617599319377e-10	up-regulated
ALPP	1.56521739130435	2.02173913043478	0.804347826086957	2.3695652173913	0.673913043478261	1	2.56521739130435	3.8695652173913	210.065217391304	14.4782608695652	12.3478260869565	3.89130434782609	198.565217391304	38.9782608695652	45.4130434782609	36.9347826086957	150.891304347826	102.869565217391	102.826086956522	84.2826086956522	76.4565217391304	168.163043478261	116.478260869565	128.978260869565	124.521739130435	157.673913043478	136.608695652174	150.152173913043	137.45652173913	151.304347826087	187.173913043478	155.173913043478	260.413043478261	26.8586956521739	249.04347826087	230.608695652174	242.282608695652	13.0434782608696	275.5	226.739130434783	326.673913043478	203.978260869565	370.95652173913	265.902173913044	242.891304347826	244.054347826087	127.945650713043	6.17048588928302e-10	up-regulated
MELK	3149.52173913044	3272.47826086957	3059.6847826087	2872.13043478261	3386.34782608696	3235.78260869565	2930.46739130435	2842.86956521739	2883.65217391304	3488.32608695652	3034.3152173913	3101.71739130435	2825.65217391304	2929.71739130435	2583.08695652174	2966.84782608696	3343.38043478261	3145.4347826087	2587.36956521739	3029.39130434783	3473.73913043478	3028.66304347826	2974.10869565217	2980.86956521739	3036.23913043478	3033.65217391304	2954.07608695652	3145.4347826087	2745.39130434783	2834.34782608696	2593.34782608696	2580.73913043478	2573.09782608696	2621.90217391304	2308.27173913044	2753.69565217391	2578.67391304348	2852.84782608696	2158.42391304348	1938.26086956522	1954.54347826087	2342.84782608696	1726.9347826087	2132.54347826087	1779.5652173913	2111.10869565217	2780.03259826087	6.28981810505627e-10	down-regulated
TMEM164	2106.13043478261	2390.30434782609	2466.26086956522	2259.02173913044	2255.39130434783	2333.51086956522	2472.5652173913	2325.4347826087	5440.02173913044	2458.47826086957	2454.52173913044	2579.17391304348	5257.04347826087	4116.47826086957	4061.21739130435	3788.8152173913	5066.5	5111.9347826087	4710.32608695652	4240.0652173913	3963.4347826087	5300.5652173913	5120.36956521739	5140.32608695652	6246.78260869565	5779.28260869565	5454.58695652174	6411.15217391304	5998.5652173913	5519.21739130435	6087.63043478261	6797.39130434783	7164.36956521739	4515.41304347826	6026.89130434783	6945.60869565217	6769.10869565217	4027.9347826087	6605.10869565218	7078.71739130435	7181.45652173913	6233.13043478261	6731.71739130435	6371.4347826087	6214.23913043478	5617.32608695652	4852.06428167391	6.31581451806773e-10	up-regulated
TM4SF18	2229.95652173913	2368.13043478261	2034.82608695652	1961.41304347826	1809.8152173913	2239.19565217391	1783.58695652174	2122.5652173913	851.043478260869	2082.10869565217	2119.76086956522	2007.80434782609	1141.39130434783	1779.80434782609	1657.47826086957	1829.30434782609	1146.67391304348	1616.10869565217	1448.54347826087	1698.0652173913	1389.26086956522	1429.84782608696	1564.80434782609	1636.95652173913	1258.6847826087	1274.89130434783	1326.28260869565	1137.95652173913	1291.13043478261	1260.76086956522	945.510869565217	1018.15217391304	858.326086956522	1431.69565217391	991.673913043478	868.336956521739	861.695652173913	1630.82608695652	787.847826086957	738.913043478261	790.195652173913	1043.07608695652	724.260869565217	946.119565217391	910.021739130435	1048.03260869565	1415.06164873913	6.35875457593759e-10	down-regulated
E2F8	338.630434782609	427.858695652174	379	410.108695652174	365.130434782609	406.489130434783	335.173913043478	417.369565217391	350.086956521739	495.456521739131	412.45652173913	396.95652173913	340.695652173913	455.760869565217	503.130434782609	355.25	438.54347826087	393.239130434783	411.173913043478	340.641304347826	350.652173913044	370.891304347826	408.597826086957	316.45652173913	332.739130434783	427.141304347826	278.369565217391	286.815217391304	397.804347826087	381.945652173913	190.010869565217	234.771739130435	256.913043478261	341.804347826087	194.076086956522	292.076086956522	224.304347826087	389.184782608696	203.217391304348	213.858695652174	190.521739130435	195.45652173913	179.782608695652	160.45652173913	114.413043478261	187.70652173913	328.111293391304	6.50718193665949e-10	down-regulated
RAP1GAP	173.847826086957	287.195652173913	257.021739130435	113.369565217391	186.891304347826	245	290.076086956522	136.717391304348	100.086956521739	213.826086956522	224.152173913043	157.282608695652	138.695652173913	266.217391304348	203.130434782609	157.369565217391	113.239130434783	233.086956521739	202.413043478261	140.195652173913	139.673913043478	174.521739130435	168.967391304348	131.913043478261	148.771739130435	186.108695652174	93.1086956521739	115.336956521739	114.228260869565	78.0652173913044	90.8695652173913	105.076086956522	76.8913043478261	123.739130434783	79.6304347826087	107.978260869565	75.9347826086957	100.989130434783	49.2173913043478	53.8695652173913	54.8695652173913	39.054347826087	28.304347826087	45.7173913043478	42.1630434782609	28.8478260869565	136.818763630435	6.732298763845e-10	down-regulated
LOX	21.0217391304348	33.1304347826087	30.2173913043478	31.6521739130435	26.5652173913044	36.1086956521739	31.8369565217391	30.2934782608696	92.9782608695652	36.0108695652174	42.804347826087	53.5	54.7391304347826	39.9782608695652	46.4782608695652	61.9021739130435	108.663043478261	54.7391304347826	41.2826086956522	76.1847826086957	66.6195652173913	67.7826086956522	60.3695652173913	94	103.195652173913	71.1847826086957	107.163043478261	71.4347826086957	118.739130434783	128.554347826087	84.6413043478261	94.6521739130435	146.239130434783	59.8260869565218	57.4565217391304	78.1086956521739	130.358695652174	66.6739130434783	138.652173913043	99.1304347826087	130.173913043478	174.108695652174	114.086956521739	132.413043478261	171.54347826087	145.739130434783	79.6290183695652	6.81461787920865e-10	up-regulated
RBL1	1846.69565217391	2087.45652173913	1964.60869565217	2219.30434782609	2199.25	2341.65217391304	1930.95652173913	2239.19565217391	1773.80434782609	2235.08695652174	1962.76086956522	2281.51086956522	1636.47826086957	1961.15217391304	2061.17391304348	2287.54347826087	2120.9347826087	2033.34782608696	2010.38043478261	2332.17391304348	1991.78260869565	2071.15217391304	2011.04347826087	2131.30434782609	2064.34782608696	2006.45652173913	2146.17391304348	1753.28260869565	1888.5652173913	2098.86956521739	1485.60869565217	1567.19565217391	1688.33695652174	1869.9347826087	1370.60869565217	1337.23913043478	1456.4347826087	2013.60869565217	1278.4347826087	1150.61956521739	1091.91304347826	1576.97826086957	873.456521739131	1184.45652173913	1258.86956521739	1389.67391304348	1832.21339376087	6.86351719496644e-10	down-regulated
FZD4	117.75	143.95652173913	187.282608695652	213.641304347826	184.152173913043	201.184782608696	177.684782608696	206.065217391304	206.891304347826	183.239130434783	205.804347826087	217.913043478261	207.532608695652	245.217391304348	318.891304347826	280.652173913044	253.086956521739	246.20652173913	378.934782608696	301.065217391304	214.304347826087	280.673913043478	329.467391304348	337.5	322.782608695652	339.260869565217	301.130434782609	303.369565217391	304.978260869565	316.152173913044	308.260869565217	403.576086956522	429.902173913044	223.630434782609	252.152173913043	287.45652173913	423.978260869565	261.826086956522	464.54347826087	502.782608695652	446.260869565217	400.847826086957	463.260869565217	436.347826086957	504.913043478261	314.869565217391	296.769139369565	7.12744051257454e-10	up-regulated
TICRR	1078.23913043478	1196.45652173913	1311.80434782609	1512	1504.54347826087	1341.83695652174	1248.69565217391	1649.11956521739	922.369565217391	1429.20652173913	1536.41304347826	1424.08695652174	915.282608695652	1273.21739130435	1375.23913043478	1358.67391304348	1219.30434782609	1186.15217391304	1300.03260869565	1357.80434782609	993.478260869565	1104.61956521739	1144.86956521739	1155.78260869565	1175.52173913043	1224.52173913044	1361.82608695652	1125.44565217391	1082.15217391304	1211.73913043478	1008.10869565217	938.065217391304	983.836956521739	1096.97826086957	755.195652173913	959.489130434783	823.065217391304	1198.3152173913	804.695652173913	794.336956521739	702.891304347826	1005.85869565217	560.54347826087	726.5	667.239130434783	642.391304347826	1117.12923730435	7.78019213752503e-10	down-regulated
LPAR1	1173.73913043478	1439.5652173913	1295.85869565217	1135.34782608696	1174.27173913043	1322.33695652174	1344.28260869565	1097.82608695652	1846.69565217391	1128.0652173913	1175.92391304348	1326.28260869565	1878.91304347826	1561.04347826087	1620.38043478261	1510.21739130435	1779.32608695652	1599.36956521739	1620.67391304348	1763.9347826087	1475.4347826087	1876.67391304348	1902.52173913043	1951.80434782609	2061.17391304348	2122.9347826087	1988.10869565217	2185.94565217391	2295.67391304348	2252.82608695652	1963.83695652174	1944.80434782609	1898.26086956522	1932.39130434783	2018.10869565217	2158.10869565217	2110.69565217391	1922.64130434783	2196.78260869565	2239.19565217391	2208.45652173913	1910.85869565217	2125.51086956522	2103.66304347826	2098.86956521739	2102.76086956522	1779.17609358696	8.25202249301882e-10	up-regulated
KLHDC4	483.673913043478	601.510869565217	664.065217391304	605.608695652174	612.608695652174	596	574.195652173913	620.913043478261	1140.28260869565	636.782608695652	641.804347826087	496.391304347826	972.521739130435	700.717391304348	796.95652173913	639.510869565217	846.521739130435	878.380434782609	972.869565217391	707.119565217391	817.565217391304	922.521739130435	928.260869565217	767.554347826087	958.04347826087	1114.94565217391	988.282608695652	1021.79347826087	1059.21739130435	976.858695652174	1115.47826086957	962.826086956522	995.565217391304	780.695652173913	1040.10869565217	1220.54347826087	1235.03260869565	641.891304347826	1094.80434782609	1267.38043478261	1274.21739130435	1117.92391304348	1312.52173913043	1184.45652173913	1274.89130434783	1093.78260869565	899.034699456522	8.2522948947558e-10	up-regulated
SDC4	1029.82608695652	787.728260869565	829.95652173913	899.29347826087	1071.15217391304	806.717391304348	885.336956521739	1001.9347826087	917.826086956522	923.673913043478	1063.54347826087	1111.34782608696	977.826086956522	787.282608695652	867.934782608696	1020.9347826087	902.228260869565	782.826086956522	935.108695652174	1020.54347826087	1028.84782608696	794.902173913044	987.347826086956	1140.10869565217	997.065217391304	974.260869565217	1269.80434782609	1077.34782608696	1061.63043478261	1018.69565217391	1240.63043478261	1289.64130434783	1232.26086956522	919.891304347826	1141.29347826087	1249.78260869565	1153.65217391304	1030.03260869565	1499.9347826087	1272.29347826087	1330.45652173913	1475.86956521739	1577.91304347826	1441.89130434783	1361.82608695652	1345.65217391304	1076.87076373913	8.49090255959582e-10	up-regulated
TMEM150A	101.108695652174	119.217391304348	87.195652173913	119.217391304348	72.9782608695652	111.217391304348	103.565217391304	137.260869565217	179.673913043478	126.086956521739	153.173913043478	121.891304347826	148.869565217391	141.391304347826	152.608695652174	143.152173913043	116.347826086957	151.413043478261	132.304347826087	143.521739130435	128.717391304348	149.673913043478	179.782608695652	163.923913043478	169.021739130435	136.304347826087	156.5	169.75	204.79347826087	189.869565217391	193.630434782609	219.032608695652	153.173913043478	165.065217391304	200.782608695652	203.673913043478	169.652173913043	158.521739130435	193.489130434783	238.869565217391	213.130434782609	174.108695652174	249.391304347826	257.913043478261	234.608695652174	153.086956521739	160.623107608696	8.66120348184329e-10	up-regulated
PCLAF	3457.89130434783	4260.53260869565	3527.47826086957	4001.23913043478	4082.25	4193	3563.01086956522	4007.86956521739	3431.04347826087	4222.78260869565	4100.4347826087	4497.01086956522	3252.01086956522	3593	3331.79347826087	4397.08695652174	4053.15217391304	3688.84782608696	3020.97826086957	4387.21739130435	4190.5652173913	3483.82608695652	3639.10869565217	4259	3587.98913043478	3676.67391304348	4035.54347826087	3280.5652173913	3477.28260869565	3575.55434782609	2913.46739130435	2860.76086956522	2967.65217391304	3368.08695652174	2295.67391304348	2942.28260869565	2827.48913043478	3678.95652173913	2389.39130434783	1869.10869565217	1959.02173913043	2825.65217391304	1775.33695652174	2392.14130434783	1981.45652173913	2492.52173913044	3387.25522117391	8.84171889987079e-10	down-regulated
SMC1A	6757.34782608696	6895.4347826087	7281.19565217391	6945.60869565217	7401.23913043478	6895.4347826087	6886.84782608696	7052.9347826087	5278.5	6609.52173913044	6838.9347826087	6617.71739130435	5700.05434782609	6807.80434782609	6791	6731.71739130435	6306.63043478261	6831.47826086957	7154.76086956522	6879.52173913044	6177.47826086957	6563.26086956522	6255.03260869565	6393.03260869565	6765.51086956522	6563.26086956522	6731.71739130435	6177.47826086957	6087.63043478261	6396.54347826087	5953.04347826087	6137.41304347826	6147.07608695652	6105.73913043478	5529.97826086957	5544.80434782609	5291.04347826087	6515.78260869565	5096.13043478261	5730.28260869565	5535.52173913044	5761.63043478261	5177.76086956522	4833.91304347826	5087.86956521739	5062.28260869565	6267.06311158696	8.84171889987079e-10	down-regulated
PKP2	233.217391304348	235.5	197.869565217391	218.739130434783	206.184782608696	226.434782608696	226.782608695652	255.29347826087	699.413043478261	223.152173913044	296.891304347826	259.54347826087	614.347826086957	335.54347826087	371.586956521739	397.260869565217	589.347826086957	477.576086956522	570.097826086957	577.445652173913	478.782608695652	648.065217391304	734.467391304348	688.467391304348	805.456521739131	831.097826086957	981.934782608696	782.391304347826	885.010869565218	893.326086956522	810.804347826087	1040.10869565217	1238.04347826087	476.54347826087	855.79347826087	774.521739130435	1000.09782608696	364.20652173913	833.065217391305	922.369565217391	979.913043478261	1104.61956521739	854.195652173913	909.478260869565	1102.5	951.804347826087	633.897685717391	9.251731720245e-10	up-regulated
IFNGR1	1436.17391304348	1690.26086956522	1683.71739130435	1577.19565217391	1560.73913043478	1809.41304347826	1801.88043478261	1541.32608695652	3842.9347826087	1958.26086956522	2026.80434782609	2103.66304347826	2921.82608695652	2133.02173913044	2326.29347826087	2766.63043478261	3187.91304347826	2685.92391304348	2396.80434782609	3122.95652173913	2679.58695652174	2802.25	3368.91304347826	3393.0652173913	3300.07608695652	3661.61956521739	3909.65217391304	3723.86956521739	4038.5652173913	4199.02173913044	3702.69565217391	3698.41304347826	4032.34782608696	2720.13043478261	2955.57608695652	3183.08695652174	4999.41304347826	2699.02173913044	4162.47826086957	3621.28260869565	4278.4347826087	4003.21739130435	3752.73913043478	4513.02173913044	4751.71739130435	4074.78260869565	3060.84168426087	9.29879249345904e-10	up-regulated
NUP62CL	316.565217391304	354.695652173913	352.967391304348	382.739130434783	293.521739130435	351.978260869565	356.95652173913	357.173913043478	165.695652173913	356.141304347826	363.695652173913	311.086956521739	193.673913043478	300.565217391304	301.130434782609	274.54347826087	222.184782608696	270.565217391304	303.239130434783	292.619565217391	209.29347826087	263.978260869565	310.184782608696	271.130434782609	261.521739130435	282.021739130435	230.45652173913	195.217391304348	234.891304347826	230.847826086957	172.869565217391	198.804347826087	204.108695652174	257.782608695652	154.173913043478	171.978260869565	226.630434782609	273.652173913044	191.108695652174	163.5	136.489130434783	198.380434782609	133.478260869565	164.173913043478	165.521739130435	173.065217391304	252.108698173913	9.5248600175711e-10	down-regulated
SIRPA	1378.22826086957	1269.07608695652	1367.23913043478	1162.97826086957	1529.02173913043	1379.67391304348	1545.52173913043	1129.22826086957	1123.17391304348	1337.46739130435	1141.61956521739	1168	1181.02173913043	1339.59782608696	1196.92391304348	1197.97826086957	1370.02173913043	1304.32608695652	1155.78260869565	974.521739130435	1436.17391304348	999.108695652174	1040.69565217391	971.597826086957	951.510869565217	978.869565217391	834.913043478261	907.956521739131	888.54347826087	804.576086956522	933.304347826087	778.804347826087	946.760869565217	989.576086956522	790.847826086957	969.54347826087	874.673913043478	926.956521739131	936.869565217391	861.695652173913	995.891304347826	722.130434782609	931.641304347826	701.79347826087	756.195652173913	627.304347826087	1061.07253015217	9.68972697946668e-10	down-regulated
SLC22A23	556.847826086957	577.804347826087	668.369565217391	562.945652173913	620.989130434783	635.739130434783	668.228260869565	623.413043478261	307.586956521739	511.967391304348	525.217391304348	531.619565217391	403.054347826087	653.239130434783	691.010869565217	507.478260869565	461.554347826087	490.173913043478	602.847826086957	481.510869565217	492.913043478261	480.489130434783	489.804347826087	470.173913043478	383.847826086957	406.586956521739	358.097826086957	287.717391304348	345.5	351	276.521739130435	278.369565217391	317.04347826087	364.717391304348	334.152173913044	287.45652173913	272.673913043478	433.108695652174	240.70652173913	380.391304347826	337.847826086957	287.891304347826	298.130434782609	279.684782608696	305.260869565217	302.923913043478	437.926278391304	9.77877556499389e-10	down-regulated
ROCK2	12535.9782608696	12103.6304347826	12810.3695652174	14880.1956521739	14035.8695652174	12853.5869565217	12169.2608695652	14436.2826086957	9449.76086956522	12715.7391304348	12354.8695652174	13733.0652173913	10405.8913043478	11797.652173913	11908.6086956522	12641.9347826087	11245.9565217391	11035.5217391304	11651.652173913	12003.6956521739	11137.7608695652	10866.1739130435	10738.5	11060.8913043478	9613.60869565217	9681.41304347826	9727.30434782609	9207.64130434783	9449.76086956522	10175.152173913	9626.19565217391	8927.02173913044	8828.73913043478	11599.2391304348	9719.1847826087	8655.41304347826	8708.73913043478	12317.7173913043	8708.73913043478	9150	7580.15217391304	9694.52173913044	8655.41304347826	7828.30434782609	8072.45652173913	9663	10786.1429792174	9.89209695285285e-10	down-regulated
SYT13	1965.71739130435	1439.5652173913	1317.82608695652	1008.41304347826	1273.4347826087	1119.13043478261	1267.38043478261	1109.32608695652	1179.16304347826	1386.9347826087	1602.41304347826	1336.32608695652	1593.80434782609	1055.77173913044	1036.78260869565	1137.78260869565	1117.92391304348	1004.97826086957	1045.32608695652	1110.20652173913	1419.90217391304	1236.72826086957	1389.26086956522	1185.58695652174	830.565217391304	923.5	1072.8152173913	926.347826086957	886.891304347826	885.5	742.869565217391	732.086956521739	778.304347826087	912.652173913044	1576.21739130435	589.347826086957	567.45652173913	751.684782608696	443.869565217391	338.380434782609	416.652173913044	519.478260869565	379.489130434783	374	422.608695652174	597.434782608696	1000.17038263043	1.00334167525632e-09	down-regulated
THSD4	1582.45652173913	2124.05434782609	2197.13043478261	1682.91304347826	2000.36956521739	2126.82608695652	2033.34782608696	1707.0652173913	1921.36956521739	1970.5	1831.65217391304	1876.67391304348	1954.92391304348	2252.30434782609	2158.42391304348	1857.35869565217	1540.30434782609	2247.84782608696	2268.96739130435	1880.39130434783	1384.17391304348	2447.71739130435	2193.97826086957	2040.54347826087	2759	2447.71739130435	2310.09782608696	2647.08695652174	2353.13043478261	2300	2858.14130434783	3414.15217391304	3086.58695652174	2364.51086956522	2814.41304347826	3633.97826086957	2919	2435.90217391304	2844.86956521739	3977.57608695652	3184.39130434783	2645.40217391304	3208.52173913044	3545.97826086957	3297.28260869565	2715.52173913044	2414.01204819565	1.02366944989932e-09	up-regulated
FRZB	3.23913043478261	1.02173913043478	4.19565217391304	0.956521739130435	0	1.97826086956522	1.17391304347826	2.91304347826087	4.43478260869565	3.84782608695652	1.06521739130435	0.956521739130435	10.9347826086957	1.06521739130435	7.57608695652174	0	7.04347826086957	2.17391304347826	2.02173913043478	5.89130434782609	5.23913043478261	3.95652173913043	7.80434782608696	10.6739130434783	8.28260869565217	5.31521739130435	8.86956521739131	8.89130434782609	6.26086956521739	10.3478260869565	6.91304347826087	10.5434782608696	8.97826086956522	7.08695652173913	14.8913043478261	11.2826086956522	8.04347826086957	4.80434782608696	18.195652173913	13.9347826086957	19.9565217391304	17.8913043478261	22.6521739130435	5	15.8260869565217	23.7826086956522	7.56332683478261	1.0253117644337e-09	up-regulated
CENPH	737.95652173913	846.673913043478	752.826086956522	901.847826086957	883.065217391305	945.652173913044	771.619565217391	855.913043478261	758.869565217391	963.065217391304	961.04347826087	850.173913043478	690.554347826087	944.065217391304	853.739130434783	920.010869565217	1001.26086956522	857.608695652174	751.065217391304	841.869565217391	891.565217391304	793.630434782609	909	825.760869565217	776.326086956522	883.978260869565	783.195652173913	758.739130434783	709.760869565217	770.45652173913	615.282608695652	653.021739130435	751.684782608696	716.076086956522	500.717391304348	627.869565217391	641.413043478261	795.434782608696	576.836956521739	492.978260869565	512.760869565217	681.108695652174	476.858695652174	507.695652173913	490.086956521739	528.717391304348	755.648634934783	1.0253117644337e-09	down-regulated
SYNJ2	2049.08695652174	2033.75	2149.89130434783	2018.52173913043	2127.78260869565	1964.60869565217	1985.04347826087	1946.17391304348	988.945652173913	2178.04347826087	1691.22826086957	2010.38043478261	1181.02173913043	1994.11956521739	2071.15217391304	1680.23913043478	1111.20652173913	1751.89130434783	1825.54347826087	1435.57608695652	1392.61956521739	1320.33695652174	1134.88043478261	1200.54347826087	958.04347826087	929.065217391304	825.021739130435	826.804347826087	931.326086956522	840.173913043478	843.804347826087	851.152173913044	812.576086956522	1279.10869565217	1131.39130434783	1091.91304347826	854.5	1297.15217391304	780.239130434783	1076.61956521739	875.641304347826	711.673913043478	926.195652173913	748.586956521739	730.826086956522	867.75	1335.48155917391	1.0253117644337e-09	down-regulated
FKBP5	308.608695652174	364.065217391304	379	477.304347826087	394.695652173913	356.847826086957	335.173913043478	470.086956521739	6452.08695652174	554.04347826087	652.913043478261	756.195652173913	5069.04347826087	2620.21739130435	2354.26086956522	2603.39130434783	5210.97826086957	4165.0652173913	4222.78260869565	4555.89130434783	3100.9347826087	5636.40217391304	4726.08695652174	5822.0652173913	7966.67391304348	6855.76086956522	8343.4347826087	8216.04347826087	7418.98913043478	7414.63043478261	7240.30434782609	8221.15217391304	8844.30434782609	3890.10869565217	5777.17391304348	7145.82608695652	8141.89130434783	3258.28260869565	8168.67391304348	8685.21739130435	8610.39130434783	8203.28260869565	8380.4347826087	8016.73913043478	8036.4347826087	6417	4887.84545276087	1.02683253289101e-09	up-regulated
NFS1	965.673913043478	896.706521739131	866.54347826087	895.260869565218	918.826086956522	859.260869565217	834.652173913043	851.923913043478	1058.54347826087	864.108695652174	874.934782608696	697.478260869565	965.065217391304	838.086956521739	705.152173913044	766.021739130435	955.239130434783	854.5	776.554347826087	731.065217391304	879.619565217391	939.673913043478	987.347826086956	809.673913043478	911.184782608696	992.260869565217	880.804347826087	1030.5	1041.04347826087	885.5	1141.84782608696	1161.46739130435	1103.51086956522	1003.23913043478	1165.20652173913	1321.02173913043	1446.10869565217	990.239130434782	1308.02173913043	1150.61956521739	1187.69565217391	1130.19565217391	1218.36956521739	1551.21739130435	1304.32608695652	1363.71739130435	1001.73940276087	1.04043543270297e-09	up-regulated
PLCL2	209.70652173913	241.826086956522	237.195652173913	282.20652173913	243.195652173913	238.130434782609	243.271739130435	257.826086956522	195.29347826087	315.326086956522	270.760869565217	245.913043478261	207.532608695652	182.5	203.130434782609	193.782608695652	216.282608695652	180.5	217.130434782609	170.630434782609	246.95652173913	192.347826086957	180.782608695652	172.282608695652	157.532608695652	184	128.336956521739	138.5	150.054347826087	166.391304347826	160.413043478261	116	130.054347826087	221.489130434783	161.086956521739	121.021739130435	149.608695652174	207.054347826087	124.260869565217	127.369565217391	120.978260869565	144.391304347826	110.315217391304	97.2826086956522	126.04347826087	148.673913043478	185.5515115	1.04347135574138e-09	down-regulated
CDC45	718.239130434783	839.054347826087	769.858695652174	1050.10869565217	780.108695652174	873.456521739131	758.369565217391	1106.86956521739	922.369565217391	985.760869565217	994.184782608696	923.95652173913	733.29347826087	997.945652173913	1150.19565217391	949.076086956522	935.739130434783	958.5	1104.3152173913	846.673913043478	998.347826086957	852.239130434783	907.663043478261	832.108695652174	837.608695652174	809.304347826087	821.369565217391	740.119565217391	812.434782608696	852.369565217391	567.45652173913	558.630434782609	475.913043478261	836.836956521739	481.804347826087	535.434782608696	555.423913043478	816.597826086957	402	447.79347826087	459.880434782609	576.891304347826	366.989130434783	361.673913043478	381.54347826087	445.728260869565	763.744334478261	1.04470929154351e-09	down-regulated
ZGRF1	428.673913043478	556.989130434783	534.847826086957	639.586956521739	615.336956521739	598.423913043478	469.217391304348	668.369565217391	408.065217391304	627.391304347826	566.239130434783	559.04347826087	357.804347826087	526.673913043478	518.304347826087	554.956521739131	503.891304347826	473.076086956522	521.608695652174	558.141304347826	410.434782608696	481.641304347826	513.239130434783	463.95652173913	530.597826086957	470.369565217391	491.369565217391	394.54347826087	488.260869565217	521.728260869565	357.065217391304	365.54347826087	324.391304347826	479.184782608696	274.652173913044	326.54347826087	347.054347826087	529.934782608696	280.782608695652	260.913043478261	231.5	390.347826086957	224.54347826087	254.978260869565	274.652173913044	313.673913043478	449.750946173913	1.06719296984253e-09	down-regulated
SAA1	1.56521739130435	0	0	0.0869565217391304	0	0	0.5	0	8.89130434782609	0	0	0.956521739130435	9.76086956521739	0	0	0	1.02173913043478	1.06521739130435	4.17391304347826	0	5.23913043478261	3.04347826086957	6.69565217391304	1.89130434782609	3.69565217391304	1.71739130434783	7.02173913043478	7.89130434782609	6.26086956521739	4.76086956521739	17.4565217391304	8.86956521739131	11.695652173913	6.06521739130435	22.8478260869565	14.2391304347826	22.3478260869565	0	18.195652173913	8.04347826086957	14.4021739130435	33.0434782608696	15.9782608695652	25.1521739130435	35.0434782608696	36.7717391304348	7.96502815695652	1.09414698671949e-09	up-regulated
ULK2	1333.57608695652	1330.02173913043	1302.48913043478	1176.45652173913	1349.61956521739	1324.0652173913	1219	1167.80434782609	2740.63043478261	1487.23913043478	1275.10869565217	1352.71739130435	2258.23913043478	1788.26086956522	1521.05434782609	1540.63043478261	2130.41304347826	1900.48913043478	1737.89130434783	1798.55434782609	1787.89130434783	2313.34782608696	1917.66304347826	1965.0652173913	2343.86956521739	2173.97826086957	2122.5652173913	2438.14130434783	2116.09782608696	2200.5	2431.78260869565	2422.60869565217	2551.58695652174	1895.60869565217	2425.82608695652	2503.86956521739	2535.77173913044	1714.97826086957	2662.71739130435	2628.82608695652	2365.95652173913	2107.71739130435	2806.32608695652	2870.80434782609	2755.82608695652	2429.26086956522	2004.84449995652	1.14792151572165e-09	up-regulated
SPX	184.760869565217	272.891304347826	358.836956521739	285.739130434783	282.45652173913	377.934782608696	412.097826086957	288.195652173913	347.054347826087	352.086956521739	363.695652173913	342.565217391304	395.891304347826	343.5	439.54347826087	463.108695652174	486.271739130435	412.152173913043	430.065217391304	521.673913043478	367.967391304348	516.413043478261	646.815217391304	584.782608695652	727.782608695652	794.239130434783	712.739130434783	705.891304347826	918.652173913044	736.29347826087	620.130434782609	706.586956521739	807.79347826087	500.891304347826	413.630434782609	569.652173913044	983.576086956522	553.021739130435	805.695652173913	743.108695652174	894.521739130435	786.478260869565	581.086956521739	920.826086956522	1200.36956521739	781.304347826087	563.9298305	1.15374630131892e-09	up-regulated
GOT1	1339.39130434783	1286.80434782609	1262.02173913043	1226.21739130435	1234.28260869565	1260.26086956522	1267.38043478261	1274.6847826087	1822.34782608696	1231.90217391304	1223.9347826087	1052.39130434783	1667.3152173913	1407.6847826087	1488.36956521739	1169.22826086957	1490.67391304348	1597.36956521739	1494.17391304348	1124.69565217391	1491.26086956522	1559.79347826087	1588.72826086957	1270.15217391304	1573.08695652174	1599.92391304348	1246.83695652174	1683.39130434783	1606.39130434783	1454.27173913043	1923.32608695652	1917.34782608696	1823	1461.86956521739	2173.13043478261	2374.08695652174	2378.65217391304	1327.48913043478	2127.78260869565	2169.76086956522	2275.48913043478	1801.60869565217	2078	2260.84782608696	2169.0652173913	2010.69565217391	1614.5025936087	1.15374630131892e-09	up-regulated
RNF145	7658.95652173913	6731.71739130435	6095.10869565217	6266.95652173913	6396.54347826087	6144	6417	6707.34782608696	8632.41304347826	7021.13043478261	7913.97826086957	6752.78260869565	8302.02173913044	6981.21739130435	6761.91304347826	6466.84782608696	6529.30434782609	7190.04347826087	7196.9347826087	6184.5	6685.65217391304	7208.60869565217	8226.26086956522	6784.10869565217	7792.13043478261	7529.70652173913	7021.13043478261	8694	8315.08695652174	8183.56521739131	8430.04347826087	8774.60869565218	7423.34782608696	8141.89130434783	8950.47826086957	10175.152173913	8183.56521739131	8216.04347826087	9241.65217391304	9065.27173913043	8582.15217391305	8721.9347826087	9338	10301.8043478261	8858.71739130435	9329.3152173913	7750.54225804348	1.1732063121019e-09	up-regulated
CD109	6838.9347826087	7770.58695652174	7943.21739130435	8788.15217391304	7760.34782608696	7516.78260869565	7281.19565217391	9084.17391304348	13468.3695652174	8748.63043478261	8183.56521739131	9058.63043478261	13052.8043478261	10117.4565217391	10437.6304347826	10929.9565217391	12783.0434782609	11432.9565217391	13733.0652173913	13052.8043478261	9306.63043478261	14271.5652173913	12907.8695652174	14127.2826086957	15622.5	13052.8043478261	15622.5	13702.6086956522	13990.6739130435	15498.7391304348	13387.1304347826	15622.5	14169.847826087	12258.8913043478	14997.7608695652	13434.5217391304	13523.6956521739	10528.6956521739	15059.4130434783	17361.8695652174	14880.1956521739	16758.152173913	15342.9565217391	15909.0217391304	15342.9565217391	16982.5869565217	12427.0800728043	1.18914379089097e-09	up-regulated
PITPNC1	107.630434782609	134.739130434783	166.239130434783	135.804347826087	134.195652173913	145.086956521739	144.95652173913	109.282608695652	351.652173913044	91.5652173913043	91.8152173913044	144.739130434783	297.260869565217	129.934782608696	136.076086956522	147.032608695652	247.25	222.065217391304	247.967391304348	253.945652173913	171.065217391304	275.5	320.445652173913	378.347826086957	367.684782608696	357.695652173913	412.45652173913	436.260869565217	440.173913043478	441.608695652174	456.869565217391	451.228260869565	486.913043478261	223.630434782609	335.423913043478	396.717391304348	435.673913043478	163.04347826087	472.869565217391	455.369565217391	482.20652173913	523.717391304348	449.815217391304	433.5	436.347826086957	416.130434782609	296.955103217391	1.19890073277622e-09	up-regulated
HAT1	4908.41304347826	5032.63043478261	4295.9347826087	5075.60869565217	4747.52173913044	4753.47826086957	4573	5405.91304347826	3887.67391304348	4960.23913043478	5540.47826086957	4809.57608695652	4008.97826086957	4698.01086956522	4438.34782608696	4555.89130434783	4722.32608695652	4612.73913043478	4457.13043478261	4358.71739130435	4820.41304347826	4367.32608695652	4821.69565217391	4530.13043478261	4562.47826086957	4548.34782608696	4435.34782608696	4205.02173913044	4205.02173913044	4601.26086956522	3855.54347826087	3635.79347826087	3536.61956521739	4262.0652173913	3438.14130434783	3408.13043478261	3678.95652173913	4650.35869565217	3370.91304347826	2988.85869565217	3184.39130434783	4100.4347826087	2929.71739130435	3165.1847826087	3270.84782608696	3817.15217391304	4265.92956991304	1.20225076752247e-09	down-regulated
SPAG5	2863.04347826087	2869.26086956522	2804.91304347826	3113.04347826087	2694.97826086957	2665.17391304348	2708.02173913044	3048.3152173913	2380.26086956522	2732.72826086957	2891.30434782609	2797.52173913044	2364.0652173913	2645.91304347826	2716	2731.63043478261	2529.26086956522	2502.36956521739	2610.98913043478	2688.39130434783	2665.17391304348	2589.15217391304	2439.03260869565	2538.54347826087	2515.89130434783	2405.86956521739	2708.02173913044	2569.94565217391	2372.60869565217	2602.30434782609	2212.94565217391	2467.73913043478	2329.05434782609	2688.85869565217	2193.54347826087	2461.0652173913	2235.58695652174	2799.10869565217	2168.28260869565	2157.53260869565	2198.36956521739	2420.5	1948.40217391304	2260.84782608696	2029.78260869565	2042.25	2529.94779015217	1.21554669016048e-09	down-regulated
RAD54L	297.978260869565	387.065217391304	313.608695652174	374.282608695652	364.478260869565	348.478260869565	339.260869565217	330.95652173913	362.891304347826	395.782608695652	418.239130434783	330.95652173913	351.652173913044	483.978260869565	473.880434782609	365.130434782609	382.815217391304	442.978260869565	443.413043478261	362.413043478261	440.304347826087	430.782608695652	376.847826086957	339.152173913044	297.108695652174	333.097826086957	304.586956521739	310.684782608696	303.347826086957	288.760869565217	261.826086956522	251.5	217.184782608696	310.04347826087	218.271739130435	271.076086956522	247.967391304348	303.347826086957	197.304347826087	200.913043478261	193.195652173913	178.065217391304	193.152173913043	155.326086956522	138.467391304348	148.673913043478	314.809307304348	1.21890875880264e-09	down-regulated
IGSF3	1957.65217391304	2129.36956521739	2172.30434782609	2084.58695652174	2410.80434782609	2062.10869565217	2158.73913043478	2047.89130434783	1648.91304347826	2208.11956521739	2030.9347826087	2481.67391304348	1677.86956521739	2320.89130434783	2528.76086956522	2253.60869565217	1878.53260869565	1956.78260869565	2340.97826086957	2170.14130434783	1899.85869565217	1829.30434782609	1892.94565217391	1937.07608695652	1715.34782608696	1833.67391304348	1815.02173913043	1574.91304347826	1592.5652173913	1627.60869565217	1493.65217391304	1559.08695652174	1761.5652173913	1828.52173913043	1521.89130434783	1691.22826086957	1514.45652173913	1761.23913043478	1437.48913043478	1619.82608695652	1619.82608695652	1461.86956521739	1648.26086956522	1348.5652173913	1285.72826086957	1352	1850.96051604348	1.22447251342421e-09	down-regulated
HSD17B4	2612.03260869565	2613.80434782609	2452.30434782609	2525.17391304348	2406.91304347826	2602.30434782609	2518.80434782609	2439.39130434783	2411.36956521739	2383.86956521739	2537.36956521739	2487.32608695652	2464.86956521739	2707.46739130435	2488.21739130435	2531.75	2302.02173913044	2742.08695652174	2612.65217391304	2585.61956521739	2326.29347826087	2783.08695652174	2517.97826086957	2786.72826086957	2909.63043478261	2651.89130434783	2885.02173913044	3034.3152173913	2834.34782608696	2715.52173913044	2966.04347826087	3129.05434782609	2883.65217391304	2669.67391304348	2910.42391304348	2845.52173913044	3008.89130434783	2563	3059.6847826087	3341	3418.5652173913	2848.26086956522	3195.73913043478	3415.84782608696	3151.79347826087	2829	2741.44162945652	1.22447251342421e-09	up-regulated
VCL	11035.5217391304	9896.73913043478	11018.5	10405.8913043478	11496.9130434783	9430	11472.9347826087	10866.1739130435	17838.9347826087	9828.78260869565	9957.36956521739	9449.76086956522	15909.0217391304	11118.1956521739	10367.0434782609	10634.2173913043	13944.6086956522	12944.0434782609	11723.9565217391	11286.4347826087	12411.8913043478	14169.847826087	13808.2608695652	13094.3695652174	16104.7391304348	14486.8260869565	16104.7391304348	17763.152173913	15671.9782608696	14436.2826086957	18085.8913043478	18530.8695652174	20421.2826086957	12137.2173913044	18908.1739130435	19405.8260869565	19013.4565217391	10866.1739130435	19739.5652173913	18817.347826087	19952.1739130435	19405.8260869565	19952.1739130435	17991.0869565217	18817.347826087	17422.8913043478	14524.8789725652	1.22776317376139e-09	up-regulated
DDX60L	1366.89130434783	1238.26086956522	1459.45652173913	1582.17391304348	1547.41304347826	1388.54347826087	1357.45652173913	1579.70652173913	1018.3152173913	1446.10869565217	1480.6847826087	1683.71739130435	1141.39130434783	1279.75	1364.39130434783	1659.95652173913	1414.17391304348	1147.01086956522	1286.53260869565	1579.22826086957	1375.73913043478	1165.64130434783	1162.66304347826	1395.4347826087	1204.60869565217	1125.65217391304	1243.45652173913	976.673913043478	1077	1136.78260869565	896.923913043478	905.576086956522	957.347826086957	1183.28260869565	927.217391304348	663.934782608696	839.217391304348	1265.45652173913	860.326086956522	720.130434782609	743.413043478261	974.934782608696	844.804347826087	755.673913043478	985.20652173913	953.239130434783	1181.77175547826	1.22880302400584e-09	down-regulated
TTPAL	1117.92391304348	1106.70652173913	1236.97826086957	1302.48913043478	1263.69565217391	1191.65217391304	1144.96739130435	1272.29347826087	1760.91304347826	1313.71739130435	1249.78260869565	1310	1475.86956521739	1180.63043478261	1296.92391304348	1386.04347826087	1795.53260869565	1376.0652173913	1533.36956521739	1645.9347826087	1534.59782608696	1632.55434782609	1690.54347826087	1682.91304347826	1734.80434782609	1756.36956521739	1873.36956521739	1807.23913043478	1792.67391304348	1821.54347826087	1806.69565217391	1803.5	1946.77173913044	1522.4347826087	1667.91304347826	1749.11956521739	1996.97826086957	1528.60869565217	1895.3152173913	1798.55434782609	1833.67391304348	2227.23913043478	1777.55434782609	1772.17391304348	2056.76086956522	1918.38043478261	1599.77763319565	1.26346093250318e-09	up-regulated
NFIC	2419.45652173913	2352.10869565217	2529.26086956522	2116.85869565217	2613.80434782609	2306.91304347826	2559.13043478261	2111.84782608696	2535.23913043478	1972.58695652174	1926.30434782609	2116.4347826087	2221.47826086957	2138.5	2173.13043478261	2319.34782608696	2427.55434782609	2360.66304347826	2555.34782608696	2602.30434782609	2254.88043478261	2670.9347826087	2839.26086956522	2768.39130434783	3241.19565217391	3156.34782608696	3593	3265.97826086957	3016.26086956522	3001.76086956522	3447.3152173913	3630.69565217391	3865.17391304348	2429.26086956522	3012.17391304348	3676.67391304348	3348.04347826087	2818.58695652174	3317.4347826087	3780.30434782609	3457.09782608696	3376.17391304348	3294.88043478261	3343.38043478261	3812.63043478261	3199.10869565217	2825.54819947826	1.3220000649869e-09	up-regulated
FAM222B	589.565217391304	538.652173913044	533.586956521739	545.402173913044	556.913043478261	538.728260869565	569.347826086957	543.913043478261	1182.63043478261	648.184782608696	694.489130434783	680.032608695652	1245.32608695652	953.5	1045.32608695652	866.684782608696	1108.61956521739	950.239130434783	1193.01086956522	1071.63043478261	1111.34782608696	1240.63043478261	1215.05434782609	1106.36956521739	1106.86956521739	1340.73913043478	1239.17391304348	1217.54347826087	1228.9347826087	1124.82608695652	1156.04347826087	1326.53260869565	1346.52173913044	1011.10869565217	1310.30434782609	1299.30434782609	1340.5	961.163043478261	1288.60869565217	1415.45652173913	1486.9347826087	1332.84782608696	1319.84782608696	1300.52173913043	1489.41304347826	1350.52173913043	1059.19353380435	1.33159444760843e-09	up-regulated
DHX15	8622.23913043478	8183.56521739131	7760.34782608696	8062.67391304348	7617.02173913043	7871.5	7770.58695652174	7913.97826086957	8380.4347826087	8315.08695652174	7987	8036.4347826087	8470.13043478261	7215.76086956522	6930.58695652174	8072.45652173913	7406.36956521739	7474.61956521739	6895.4347826087	7688.9347826087	8047.86956521739	7312.72826086957	7588.78260869565	7751.13043478261	6981.21739130435	7091.8152173913	7329.89130434783	7136.17391304348	7730.15217391304	7452	7136.17391304348	6718.32608695652	6443.02173913044	7903.30434782609	6752.78260869565	7119.80434782609	6657.97826086957	7510.17391304348	6731.71739130435	5993.06521739131	6331.9347826087	6411.15217391304	6032.34782608696	6695.21739130435	6239.84782608696	6879.52173913044	7362.02813802174	1.33528404322967e-09	down-regulated
SRSF10	4279.8152173913	4422.76086956522	4710.32608695652	5132.21739130435	4202.08695652174	4622.1847826087	4559.47826086957	5216.26086956522	4791.69565217391	4427.34782608696	4569.63043478261	4651.84782608696	4614.8152173913	4392.48913043478	4100.4347826087	5084.26086956522	4999.41304347826	4679.95652173913	4544.63043478261	5300.5652173913	4333.0652173913	5245.47826086957	4968.04347826087	5454.58695652174	5789.91304347826	4948.15217391304	5948.71739130435	5732.85869565217	5613.02173913044	5904.44565217391	5661.63043478261	6110.63043478261	5873.04347826087	6761.91304347826	5236.5	5167.52173913044	6184.5	6582.19565217391	5702.58695652174	5953.04347826087	6063.11956521739	6563.26086956522	5638.60869565217	6162.45652173913	6417	6326.65217391304	5296.63399056522	1.33749431954644e-09	up-regulated
B4GALT4	6258.65217391304	6628.26086956522	6558.73913043478	5725.45652173913	6196.13043478261	7190.04347826087	6543.08695652174	5480.69565217391	4326.65217391304	6371.4347826087	5942.4347826087	5173.0652173913	5106.0652173913	6575.26086956522	6216.73913043478	5222.45652173913	4587.73913043478	6791	5862.41304347826	4981.03260869565	5807.84782608696	6126.63043478261	5286.5	4789.22826086957	5177.76086956522	5054.4347826087	3834.69565217391	5163.73913043478	4955.07608695652	4272.15217391304	4973.88043478261	4569.63043478261	4097.4347826087	5173.0652173913	5038.15217391304	4193	4256.36956521739	4807.63043478261	3890.10869565217	4087.06521739131	4089.4347826087	3426.36956521739	3560.41304347826	3735.41304347826	3775.32608695652	3863.82608695652	5124.83791778261	1.34354125160146e-09	down-regulated
RASEF	685.739130434783	874.217391304348	867.934782608696	748.804347826087	764.869565217391	871.380434782609	839.902173913043	793.326086956522	447.45652173913	1012.5652173913	1103.30434782609	820.489130434783	483.260869565217	633.521739130435	729.402173913044	704.586956521739	590.978260869565	546.336956521739	649.902173913044	639.586956521739	658.739130434783	645.706521739131	766.54347826087	631.739130434783	685.282608695652	630.217391304348	631.619565217391	558.478260869565	606.097826086957	571.369565217391	378.608695652174	449.945652173913	491.858695652174	527.847826086957	440.630434782609	382.663043478261	381.945652173913	512.152173913044	342.880434782609	331.576086956522	360.565217391304	387.228260869565	260.54347826087	428.804347826087	478.20652173913	431.326086956522	603.916114652174	1.34699737985422e-09	down-regulated
AC018629.1	147.597826086957	182.065217391304	211.54347826087	175.869565217391	215	178.79347826087	191.902173913044	148.532608695652	374.869565217391	192.739130434783	195.54347826087	221.282608695652	327.141304347826	230.065217391304	310.858695652174	313.434782608696	392.423913043478	324.108695652174	413.152173913044	445.086956521739	327.630434782609	353.29347826087	543.739130434783	490.989130434783	547.804347826087	594.478260869565	671.282608695652	540.130434782609	600.782608695652	526.79347826087	493.032608695652	518.978260869565	722.260869565218	380.20652173913	345.380434782609	433.347826086957	604.869565217391	394.869565217391	604.869565217391	701.673913043478	689.891304347826	594.228260869565	545.804347826087	592.152173913044	804.891304347826	482.739130434783	419.524576456522	1.41068357140729e-09	up-regulated
ITGA5	1131.25	985.086956521739	1049.76086956522	781.304347826087	1177.9347826087	974.934782608696	1041.54347826087	775.586956521739	4781.72826086957	1101.57608695652	1076.15217391304	1132.30434782609	4309.45652173913	1948.71739130435	1647.77173913044	1691.91304347826	3404.45652173913	2699.02173913044	2217.5	2172.30434782609	2869.26086956522	3037.60869565217	2679.02173913044	2711.80434782609	3510	3326.44565217391	3152.80434782609	4341	3370.91304347826	3024.30434782609	5084.26086956522	4467.73913043478	4662.86956521739	2713.23913043478	5108.32608695652	5914.5	4889.36956521739	1921.73913043478	6177.47826086957	5123.89130434783	5707.23913043478	3702.69565217391	6718.32608695652	4732.82608695652	4594.69565217391	3869.5	3119.82960484783	1.42063951376084e-09	up-regulated
VASN	70.1956521739131	80.4347826086957	73.1195652173913	70.6521739130435	55.9130434782609	56.3152173913043	82.8913043478261	100.934782608696	40.0652173913044	70.7826086956522	75.9565217391304	62.6630434782609	42.2391304347826	60.5	62.7608695652174	40.9456521739131	33.2608695652174	47.6304347826087	63.4347826086957	46.3804347826087	50.2065217391304	36.2391304347826	49.5652173913044	47.1739130434783	29.6304347826087	31.6521739130435	30.5869565217391	37	27.9130434782609	31.7173913043478	23.4239130434783	20.1521739130435	29.8804347826087	54.804347826087	33.2391304347826	27.3478260869565	20.1521739130435	48.5869565217391	14.5652173913043	16.9347826086957	38.8804347826087	26.1304347826087	14.804347826087	15.1304347826087	22.1086956521739	27.0869565217391	44.3910680652174	1.52948440140798e-09	down-regulated
SENP1	1353.58695652174	1574.66304347826	1544.34782608696	1747.65217391304	1583.91304347826	1571.51086956522	1506.73913043478	1737.63043478261	1377.27173913043	1570.80434782609	1541.32608695652	1598.83695652174	1422.32608695652	1542.67391304348	1613.0652173913	1547.64130434783	1467.63043478261	1513.97826086957	1494.17391304348	1486.39130434783	1431.69565217391	1444.4347826087	1540.95652173913	1562.39130434783	1444.91304347826	1392.80434782609	1564.80434782609	1458.44565217391	1439.79347826087	1479.34782608696	1373.67391304348	1346.52173913044	1436.40217391304	1419.51086956522	1298.65217391304	1328.02173913044	1339.39130434783	1511.0652173913	1233.47826086957	1285.45652173913	1221.8152173913	1369.25	1244.73913043478	1187.30434782609	1295.97826086957	1250.63043478261	1449.94870415217	1.54822720585022e-09	down-regulated
SGMS2	1050.27173913044	1052.25	1177.58695652174	1309	1131.94565217391	1113.44565217391	1235.03260869565	1413.47826086957	2173.13043478261	1303.9347826087	1385.69565217391	1385.86956521739	1789.11956521739	1178.79347826087	1229.69565217391	1540.63043478261	1754.9347826087	1369.04347826087	1481.34782608696	1954.20652173913	1496.01086956522	1659.39130434783	1990.86956521739	2141.80434782609	2406.39130434783	2254.36956521739	2658.19565217391	2530.21739130435	2571.02173913044	2542.13043478261	2351.65217391304	2390.30434782609	2733.34782608696	1776.10869565217	1954.20652173913	1951.80434782609	2564.8152173913	1633.11956521739	2615.79347826087	2120.16304347826	2288.54347826087	2934.30434782609	2358.76086956522	2535.77173913044	2851.58695652174	2853.38043478261	1917.24952267391	1.57329212099425e-09	up-regulated
GPD1L	1721.65217391304	1833.13043478261	1915.25	2188.08695652174	1752.26086956522	1776.10869565217	1985.04347826087	2144.54347826087	2258.63043478261	1556.09782608696	1798.84782608696	2004.82608695652	2086.35869565217	1859.11956521739	2122.9347826087	2091.59782608696	2217.5	1811.20652173913	2014.72826086957	2045.05434782609	2010.38043478261	1960.71739130435	1963.52173913043	2177.11956521739	1900.48913043478	2025.51086956522	2122.5652173913	1991.78260869565	2135.45652173913	2182.77173913043	2101.96739130435	2204.03260869565	2477.97826086957	2399.0652173913	2217.84782608696	1975.86956521739	2621.90217391304	2315.53260869565	2642.5	2530.76086956522	2940.32608695652	3045.5	2586.8152173913	2571.58695652174	2811.86956521739	2964.63043478261	2175.24954634783	1.57534032754261e-09	up-regulated
GPRIN1	298.934782608696	256.717391304348	219.630434782609	276.782608695652	228.304347826087	251.673913043478	287.782608695652	261.239130434783	321.782608695652	252.934782608696	252.869565217391	267.586956521739	231.652173913044	254.652173913044	306.260869565217	223.347826086957	282.086956521739	260.978260869565	298.086956521739	210.065217391304	263.891304347826	212.717391304348	259.391304347826	226.630434782609	231.586956521739	247.54347826087	237	223.510869565217	187.097826086957	210.391304347826	211.521739130435	217.717391304348	188.826086956522	189.29347826087	211.065217391304	218.195652173913	184.673913043478	190.826086956522	176.673913043478	164.684782608696	203.804347826087	187.021739130435	183.065217391304	167.782608695652	167.782608695652	170.989130434783	229.935962956522	1.57584916278773e-09	down-regulated
RHNO1	747.217391304348	886.760869565218	753.989130434783	758.195652173913	788.586956521739	819.934782608696	706.086956521739	786.586956521739	786.304347826087	848.195652173913	815.336956521739	769.739130434783	623.826086956522	720.760869565217	728.173913043478	801.989130434783	805.695652173913	741.282608695652	741.608695652174	777.673913043478	857.521739130435	681.956521739131	820.326086956522	736.108695652174	751.782608695652	783.739130434783	743.217391304348	671.152173913044	736.478260869565	682.369565217391	585.239130434783	648.304347826087	634.75	651.815217391304	568.54347826087	641.608695652174	619.79347826087	691.695652173913	545.326086956522	603.619565217391	533.586956521739	590.076086956522	524.565217391304	659.173913043478	605.54347826087	556.282608695652	707.2287355	1.57584916278773e-09	down-regulated
A4GALT	131.173913043478	151.54347826087	174.304347826087	129.010869565217	163.445652173913	164.630434782609	165.913043478261	153.065217391304	292.04347826087	160.326086956522	157.282608695652	148.054347826087	249.010869565217	244.086956521739	240.70652173913	167.782608695652	241.869565217391	295.652173913044	280.891304347826	180.45652173913	187.70652173913	321.70652173913	251.728260869565	240.826086956522	354.369565217391	301.163043478261	223.347826086957	329.565217391304	308.108695652174	352.130434782609	332.663043478261	399.271739130435	392.608695652174	196.847826086957	313.489130434783	465.336956521739	383.79347826087	201.315217391304	459.913043478261	525.717391304348	514.119565217391	301.54347826087	534.434782608696	428.804347826087	410.380434782609	273.739130434783	280.345224913043	1.5846334492224e-09	up-regulated
PDLIM1	2464.86956521739	2150.23913043478	2416.05434782609	1749.69565217391	2023.67391304348	2230.47826086957	2458	1776.85869565217	5655.60869565217	2857.67391304348	2817.02173913044	2553.30434782609	4419.4347826087	3458.77173913044	3037.60869565217	3235.78260869565	3989.82608695652	4544.63043478261	3607.78260869565	3523.41304347826	3872.41304347826	4705.95652173913	4013.80434782609	4161.32608695652	5052.58695652174	4795.08695652174	4992.41304347826	5833.95652173913	4524.34782608696	4128.32608695652	6336.11956521739	6590.63043478261	6945.60869565217	2890.70652173913	6761.91304347826	7060.86956521739	6776.15217391304	2387.39130434783	7005.73913043478	6776.15217391304	7037.41304347826	5154.65217391304	6769.10869565217	7584.46739130435	6961.26086956522	4992.41304347826	4458.29442819565	1.594880843201e-09	up-regulated
SLC45A1	32.804347826087	37.2608695652174	36.1086956521739	27.3260869565217	37.0108695652174	39.1521739130435	55.9347826086957	36.4347826086957	119.119565217391	58.9565217391304	42.804347826087	29.8913043478261	106.576086956522	109.858695652174	69.75	79.5760869565217	106.565217391304	131.173913043478	100.086956521739	90.7391304347826	72.804347826087	129.130434782609	94.304347826087	76.804347826087	159.630434782609	146.217391304348	87.8260869565217	158.152173913043	128.086956521739	112.282608695652	185.978260869565	172.282608695652	187.097826086957	112.282608695652	135.217391304348	198.152173913043	164.79347826087	98.3478260869565	154.086956521739	245.173913043478	214.608695652174	102.934782608696	215.902173913044	197.782608695652	151.304347826087	124.5	112.452505891304	1.62430443180307e-09	up-regulated
CD44	18908.1739130435	19013.4565217391	19294.5217391304	15760.3043478261	17500.1086956522	17763.152173913	19405.8260869565	16445.7173913043	18345.152173913	16916.0652173913	17422.8913043478	19739.5652173913	17763.152173913	15671.9782608696	17838.9347826087	19952.1739130435	18257.8695652174	16674.5217391304	18257.8695652174	19210.6739130435	18721.2826086957	17763.152173913	17694.2608695652	19013.4565217391	16916.0652173913	17422.8913043478	19739.5652173913	17214.3260869565	17129.3695652174	17129.3695652174	15559.9130434783	15402.7173913043	15854.5652173913	14035.8695652174	15059.4130434783	14082.4782608696	15292.2391304348	13769.6956521739	13769.6956521739	13468.3695652174	13857.4565217391	14436.2826086957	12838.1956521739	12783.0434782609	14212.5434782609	14082.4782608696	16682.4089224348	1.6783520388139e-09	down-regulated
SH3TC1	116.54347826087	143.152173913043	121.510869565217	97.1304347826087	132.652173913043	128.086956521739	167.20652173913	97.3913043478261	487.891304347826	172.282608695652	156.097826086957	135.663043478261	516.5	285.70652173913	268.586956521739	210.608695652174	325.032608695652	418.195652173913	305.086956521739	310.271739130435	346.902173913044	433.717391304348	365.815217391304	339.152173913044	442.413043478261	383.847826086957	354.369565217391	472.152173913044	387.913043478261	375.630434782609	489.652173913044	538.728260869565	508.086956521739	359.217391304348	547.717391304348	617.717391304348	613.173913043478	227.010869565217	474.695652173913	717.684782608696	728.695652173913	382.521739130435	720.608695652174	597.521739130435	545.152173913044	453.021739130435	369.972120021739	1.7172213977032e-09	up-regulated
PITPNM3	89.8260869565217	68.9565217391304	82.8260869565217	80.5217391304348	117.782608695652	67.8478260869565	67.3913043478261	89.7717391304348	224.054347826087	104.967391304348	116.108695652174	112.163043478261	162.217391304348	60.5	110.184782608696	99.1521739130435	170.565217391304	119.945652173913	114.934782608696	121.869565217391	126.923913043478	156.45652173913	158	148.95652173913	211.141304347826	189.826086956522	195.782608695652	152.413043478261	270.29347826087	158.934782608696	154.260869565217	204.184782608696	190.010869565217	139.913043478261	180.934782608696	244.369565217391	181.891304347826	154.423913043478	222.445652173913	209.510869565217	239.739130434783	237.619565217391	220.184782608696	231.108695652174	209.630434782609	259.141304347826	157.167061456522	1.72069798527398e-09	up-regulated
NPTXR	666.978260869565	639.95652173913	666.391304347826	598.673913043478	717.902173913044	638.782608695652	687.652173913044	589.717391304348	520.195652173913	575.673913043478	574.260869565217	532.934782608696	509.673913043478	596.282608695652	584.076086956522	573.217391304348	547.521739130435	546.336956521739	596.086956521739	492.75	551.097826086957	506.717391304348	493.5	460.239130434783	514.804347826087	427.141304347826	473.173913043478	508.521739130435	431.826086956522	429.75	513.673913043478	464.782608695652	507.239130434783	508.282608695652	506.217391304348	485.413043478261	455.847826086957	535.934782608696	437.597826086957	467.097826086957	516.880434782609	440.304347826087	456.130434782609	356.04347826087	395.108695652174	386.478260869565	523.584118065217	1.75955011622911e-09	down-regulated
ATOH8	531.619565217391	483.586956521739	435.836956521739	714.065217391304	434.45652173913	429.5	689.782608695652	792.521739130435	1285.72826086957	372.076086956522	370.95652173913	508.282608695652	1058.54347826087	504.717391304348	549.108695652174	580.021739130435	1188	857.608695652174	825.684782608696	835.021739130435	853.989130434783	827.565217391304	825.173913043478	1047.34782608696	874.217391304348	934.891304347826	836.076086956522	949.076086956522	939.673913043478	1046.89130434783	947.576086956522	958.347826086957	1221.38043478261	1191.80434782609	1063.17391304348	1048.34782608696	1252.91304347826	1045.48913043478	1062.60869565217	1138.47826086957	1350.69565217391	1420.08695652174	1284.13043478261	1168.85869565217	1263.19565217391	1503.26086956522	902.225431586957	1.7821007648199e-09	up-regulated
OSBPL1A	912.858695652174	901.097826086957	801.891304347826	883.619565217391	928.978260869565	937.434782608696	857.434782608696	817.913043478261	1169.22826086957	945.369565217391	785.391304347826	809.673913043478	1155.78260869565	997.945652173913	943	917.021739130435	1099.19565217391	1081.82608695652	962.510869565217	895.934782608696	994.304347826087	1146.52173913043	1037.66304347826	928.717391304348	1115.10869565217	1046.46739130435	1039.95652173913	1219.65217391304	1051.52173913043	1072.97826086957	1200	1232.26086956522	1218.52173913043	1031.95652173913	1225.30434782609	1391.1847826087	1275.32608695652	992.684782608696	1231.0652173913	1274.47826086957	1219	1131.25	1401.76086956522	1333.57608695652	1195.76086956522	1174.47826086957	1064.90453717391	1.78696086142484e-09	up-regulated
FAM83D	3192.73913043478	3321.9347826087	3319.28260869565	3349.9347826087	3129.95652173913	3262.86956521739	3283.19565217391	3483.82608695652	3157.89130434783	2841.58695652174	2778.10869565217	2733.97826086957	2956.34782608696	2938.88043478261	3264.03260869565	2843.54347826087	3386.34782608696	2792.5	3167.04347826087	2807.10869565217	3603.34782608696	2810.69565217391	2907.0652173913	2725.08695652174	2769.54347826087	3081.26086956522	2797.95652173913	2507.45652173913	2981.54347826087	2950.91304347826	2740.63043478261	2664.51086956522	2674.73913043478	3069.78260869565	2532.75	2759	2643.71739130435	3096.5	2223.51086956522	2239.19565217391	2305.80434782609	2571.58695652174	1991.78260869565	2071.15217391304	2060.21739130435	2320.89130434783	2850.25544141304	1.89211390556118e-09	down-regulated
NES	141.163043478261	145.086956521739	102.760869565217	134.79347826087	125.836956521739	131.304347826087	138.021739130435	135.29347826087	120.510869565217	124.880434782609	129.521739130435	101.891304347826	114.282608695652	124.565217391304	101.45652173913	86.5217391304348	117.717391304348	126.434782608696	100.086956521739	91.9782608695652	128.717391304348	94.6086956521739	129.467391304348	74.6086956521739	97.304347826087	106.130434782609	80.5217391304348	125.304347826087	74.5326086956522	94	87.304347826087	98.1304347826087	108.032608695652	128.391304347826	87.0978260869565	82.7608695652174	81.5869565217391	112.934782608696	66.0652173913044	51.1413043478261	69.4130434782609	69.4130434782609	46	53.9782608695652	43.0434782608696	67.7608695652174	101.138233934783	1.90837184477021e-09	down-regulated
VCAN	4210.36956521739	4394.5	5911.4347826087	5854.51086956522	6613.9347826087	4873.28260869565	4364.45652173913	5885.34782608696	2713.23913043478	4646.89130434783	5486.21739130435	6144	2983.9347826087	4416.67391304348	5338.23913043478	5402.02173913044	3440.58695652174	3958.04347826087	4580.39130434783	5154.65217391304	3345.17391304348	3462.79347826087	4089.4347826087	4236.13043478261	3413.41304347826	3910.90217391304	4128.32608695652	2897.6847826087	3591.21739130435	3635.79347826087	2715.52173913044	2490.52173913044	2520.4347826087	4026.76086956522	2024.23913043478	2153.67391304348	2155.4347826087	4696.45652173913	2356.01086956522	2071.84782608696	1851.76086956522	2791.52173913044	2141.04347826087	1475.4347826087	2050.08695652174	2392.63043478261	3760.80389697826	1.93394958750877e-09	down-regulated
TCF7	180.391304347826	170.586956521739	161.260869565217	184.304347826087	201.04347826087	144.260869565217	153.086956521739	176.108695652174	86.1521739130435	176.336956521739	172.771739130435	168.282608695652	115.5	128.782608695652	156.54347826087	148.054347826087	120.282608695652	104.217391304348	124.565217391304	144.586956521739	144.54347826087	93.5869565217391	152.282608695652	173.891304347826	95.3695652173913	106.130434782609	119.45652173913	88.6086956521739	135.5	119.434782608696	117.054347826087	82.5652173913043	89.7173913043478	107.347826086957	97.7391304347826	80.4782608695652	85.3478260869565	128.521739130435	93.4782608695652	86.4239130434783	67	95.3478260869565	78.6086956521739	68.8478260869565	74.6086956521739	83.5217391304348	123.533316173913	1.95058434323052e-09	down-regulated
HPD	4.1304347826087	9.97826086956522	5.10869565217391	14.0217391304348	6.80434782608696	9.8695652173913	10.2608695652174	7.80434782608696	26.7934782608696	7.77173913043478	11.2934782608696	7.91304347826087	24.304347826087	18	23.9782608695652	13.6086956521739	16.9673913043478	35.0869565217391	23.8913043478261	14.8695652173913	9.76086956521739	24.2608695652174	29	22.195652173913	26.6521739130435	35.3260869565217	22.7065217391304	21.3478260869565	19.5	19.1521739130435	52.8695652173913	56.2173913043478	39.0434782608696	14.9782608695652	28.6739130434783	59.7608695652174	51.0652173913044	14.8913043478261	69.3913043478261	56.9891304347826	54.8695652173913	37.9130434782609	68.4347826086957	65.6847826086957	47.6086956521739	31.5	27.6576088695652	1.95358061572669e-09	up-regulated
PKMYT1	316.565217391304	263.739130434783	257.021739130435	263.086956521739	307.347826086957	256.652173913044	265.684782608696	253.913043478261	330.847826086957	284.021739130435	337.326086956522	294.20652173913	325.086956521739	332.586956521739	345.260869565217	339.20652173913	311.913043478261	367.521739130435	265.217391304348	256.532608695652	379.130434782609	356.391304347826	313.869565217391	299.95652173913	276.065217391304	264.934782608696	280.869565217391	265.684782608696	263.347826086957	224.695652173913	199.804347826087	202.673913043478	233.315217391304	219.260869565217	194.076086956522	224.804347826087	196.652173913043	223.510869565217	154.086956521739	163.5	189.478260869565	150.858695652174	133.478260869565	145.54347826087	122.260869565217	116.95652173913	255.8466465	1.96049450177028e-09	down-regulated
FBXO3	1585	1747.0652173913	1828.08695652174	2022.82608695652	1766.72826086957	1887.3152173913	1822.34782608696	2097.5652173913	1755.77173913044	1590.69565217391	1747.65217391304	1816.17391304348	1712.16304347826	1689.73913043478	1833.95652173913	1989.98913043478	1834.23913043478	1697.52173913043	1817.88043478261	1955.57608695652	1677.86956521739	1786.91304347826	1737.89130434783	2060.21739130435	2027.33695652174	1943.86956521739	2125.51086956522	1866.10869565217	2067.28260869565	2242.19565217391	2036.92391304348	2116.85869565217	2187.57608695652	2138.10869565217	2049.73913043478	1801.60869565217	2255.39130434783	2196	2316.82608695652	2244.5	2382.73913043478	2688.85869565217	2138.10869565217	2472.5652173913	2504.41304347826	2617.65217391304	1997.42084493478	1.97788908200925e-09	up-regulated
MIR3936HG	120.358695652174	128.228260869565	172.434782608696	203.086956521739	185.413043478261	151.891304347826	132.402173913044	223.065217391304	252.739130434783	138.630434782609	175.260869565217	148.054347826087	263.739130434783	171.608695652174	231.739130434783	224.54347826087	256.532608695652	219.369565217391	247.967391304348	275.630434782609	206.695652173913	257.608695652174	242.978260869565	266.380434782609	259.141304347826	263.195652173913	365.869565217391	247.54347826087	331.5	358.54347826087	275.565217391304	332.54347826087	259.304347826087	335.326086956522	287.847826086957	230.608695652174	324.271739130435	282.086956521739	309.423913043478	343.29347826087	302.717391304348	367.326086956522	281.521739130435	341.630434782609	410.380434782609	328.989130434783	255.108459108696	1.98702906699071e-09	up-regulated
LMO4	754.782608695652	742.467391304348	713.195652173913	724.021739130435	730.282608695652	634.413043478261	646.739130434783	646	822.630434782609	793.326086956522	723.358695652174	796.434782608696	669.108695652174	687.358695652174	702.04347826087	803.913043478261	801.608695652174	830.891304347826	683.260869565217	870.673913043478	855.673913043478	709.173913043478	660.369565217391	772.54347826087	633.141304347826	680.510869565218	711.858695652174	584.076086956522	594.228260869565	578.141304347826	534.630434782609	483.434782608696	540.760869565217	462.391304347826	450.260869565217	552.021739130435	475.326086956522	534.195652173913	567.108695652174	428.804347826087	519.815217391304	429.45652173913	531.771739130435	490.989130434783	410.380434782609	444.739130434783	639.398153521739	2.04042407854509e-09	down-regulated
LYN	1473.0652173913	1423.92391304348	1430.26086956522	1425.13043478261	1481.80434782609	1418.64130434783	1435.97826086957	1443.73913043478	1169.22826086957	1300.36956521739	1352.5	1378.22826086957	1167.80434782609	1273.21739130435	1282.86956521739	1343.76086956522	1240.84782608696	1275.10869565217	1207.25	1257.34782608696	1405.30434782609	1155.36956521739	1260.76086956522	1333.36956521739	1047.19565217391	1204.0652173913	1155.78260869565	1074	1175.17391304348	1149.8152173913	1169.54347826087	1053.80434782609	1022.23913043478	1235.5	1071.29347826087	987.347826086956	1004.33695652174	1342.36956521739	1110.34782608696	937.271739130435	939.173913043478	1145.0652173913	948.141304347826	1067.70652173913	1009.23913043478	1170.89130434783	1216.4388025	2.05576398337185e-09	down-regulated
SHISAL1	135.152173913043	107.065217391304	128.847826086957	200.489130434783	167.260869565217	125.989130434783	132.402173913044	177.260869565217	97.2608695652174	137.152173913043	138.130434782609	219.086956521739	94.5	112.130434782609	146.869565217391	149.25	136.978260869565	105.478260869565	140.336956521739	112.163043478261	151.847826086957	73.7391304347826	106.619565217391	110.130434782609	73.0652173913044	67.1195652173913	78.3804347826087	51.2934782608696	77.8478260869565	88.1086956521739	69.3369565217391	43.9347826086957	40.7173913043478	121.945652173913	63.4347826086957	50.6956521739131	48.8804347826087	122.260869565217	42.6413043478261	31.0869565217391	49.9130434782609	63.0217391304348	60	26.9782608695652	28.8695652173913	43.9565217391304	98.9050088913044	2.05576398337185e-09	down-regulated
KIAA1210	0	0	1.56521739130435	0	0.673913043478261	1	0	1.02173913043478	4.43478260869565	0	0	0.956521739130435	1.15217391304348	4.6304347826087	3.80434782608696	1.89130434782609	2.02173913043478	3.39130434782609	5.32608695652174	9.56521739130435	5.23913043478261	3.95652173913043	2.10869565217391	5.89130434782609	3.69565217391304	7.30434782608696	6.06521739130435	5.19565217391304	7.95652173913044	10.3478260869565	7.97826086956522	3.47826086956522	8.17391304347826	4.1304347826087	4.65217391304348	9.10869565217391	16.0869565217391	3.82608695652174	15.9130434782609	10.0217391304348	18.8260869565217	13.9130434782609	9.08695652173913	13.1739130434783	27.9130434782609	10.8695652173913	6.00756136304348	2.07696777902653e-09	up-regulated
VSTM2L	72.1521739130435	63.7826086956522	66.0652173913044	37	67.1521739130435	53.5869565217391	75.6086956521739	36.4347826086957	279.913043478261	79.2934782608696	70.4021739130435	68.2173913043478	240.521739130435	100.95652173913	107.239130434783	74.8695652173913	173.065217391304	144.20652173913	84.7608695652174	127.260869565217	164.880434782609	179.217391304348	142.804347826087	168.413043478261	232.576086956522	239.586956521739	170.826086956522	300.836956521739	252.45652173913	207.760869565217	279.521739130435	256.586956521739	263.271739130435	82.4130434782609	361.065217391304	371.760869565217	352.739130434783	89.7826086956522	369.717391304348	272.141304347826	362.326086956522	244.847826086957	291.152173913044	369.021739130435	319.804347826087	285.70652173913	188.12405623913	2.08746445864401e-09	up-regulated
KYAT1	174.847826086957	195.913043478261	176.45652173913	171.29347826087	174.434782608696	178.79347826087	178.29347826087	194.326086956522	359.95652173913	221.380434782609	176.54347826087	143.521739130435	314.673913043478	225.804347826087	251.565217391304	236.782608695652	253.086956521739	339.369565217391	309.347826086957	240.478260869565	269.478260869565	344.521739130435	300.565217391304	265.304347826087	337.45652173913	310.152173913044	266.380434782609	365.5	308.108695652174	257.869565217391	380	443.869565217391	476.717391304348	259.141304347826	416.804347826087	487.5	526.521739130435	197.673913043478	430.413043478261	537.413043478261	487.95652173913	307.880434782609	501.239130434783	461.5	444.826086956522	382.45652173913	310.524335152174	2.2273140670995e-09	up-regulated
TNS2	329.086956521739	393.45652173913	422.239130434783	264.304347826087	343.565217391304	464.130434782609	399.95652173913	267.260869565217	928.065217391304	375.717391304348	334.45652173913	306.152173913044	742.728260869565	597.434782608696	432.760869565217	489.021739130435	695.326086956522	963.065217391304	584.695652173913	646.271739130435	535.771739130435	1038.90217391304	813.586956521739	737.467391304348	1113.04347826087	940.260869565217	840.173913043478	1256.28260869565	999.413043478261	831.695652173913	1101.67391304348	1293.76086956522	1152.5652173913	702.586956521739	1012.91304347826	1409.89130434783	1283.94565217391	532.554347826087	1087.30434782609	1474.51086956522	1302.48913043478	858.760869565217	1357.45652173913	1401.95652173913	1281.95652173913	805.369565217391	807.521505608696	2.23853681700296e-09	up-regulated
UNC13B	1339.39130434783	1218.83695652174	1462.77173913043	1191.15217391304	1300.36956521739	1357.63043478261	1456.23913043478	1127.78260869565	1528.60869565217	1180.82608695652	1153.13043478261	1021.07608695652	1669.5652173913	1309.21739130435	1525.39130434783	1057	1382.65217391304	1502.59782608696	1522.60869565217	1018.47826086957	1294.82608695652	1534.59782608696	1387.1847826087	1165.4347826087	1477.95652173913	1636	1214.21739130435	1603.64130434783	1523.47826086957	1384.17391304348	1790.38043478261	1788.52173913044	1926.30434782609	1620.38043478261	2001.84782608696	1910.58695652174	1971.89130434783	1496.91304347826	1938.26086956522	2188.08695652174	2220.89130434783	1696.21739130435	2122.9347826087	1806.96739130435	1926.30434782609	1930.66304347826	1540.95627408696	2.31505204514138e-09	up-regulated
L1CAM	255.684782608696	244.815217391304	308.934782608696	206.065217391304	260.413043478261	234.978260869565	268.608695652174	211.945652173913	254.434782608696	223.152173913044	202.434782608696	234.608695652174	268.413043478261	257.608695652174	233.163043478261	202.260869565217	302.760869565217	197.347826086957	207.532608695652	207.75	275.065217391304	224.630434782609	193.630434782609	213.608695652174	211.141304347826	219.163043478261	191.902173913044	189.478260869565	220.782608695652	139.413043478261	187.173913043478	188.510869565217	200.217391304348	169.663043478261	165.065217391304	217.326086956522	205.760869565217	182.826086956522	147.782608695652	126.184782608696	162.119565217391	132.173913043478	150.04347826087	116.978260869565	131.782608695652	137.380434782609	206.146032804348	2.35909456912323e-09	down-regulated
LEFTY1	5	8.97826086956522	4.19565217391304	4.21739130434783	0.673913043478261	3	4.65217391304348	3.8695652173913	23.9782608695652	6.43478260869565	11.2934782608696	5.93478260869565	12.195652173913	14.6739130434783	12.6739130434783	9.8695652173913	33.2608695652174	15	22.6739130434783	31.75	25.2391304347826	23.195652173913	27.804347826087	28.8478260869565	44.7608695652174	56.3152173913043	28.7173913043478	23.3260869565217	41.195652173913	54.4347826086957	49.2826086956522	38.6739130434783	43.7934782608696	15.9673913043478	27.5217391304348	52.5652173913044	41.4130434782609	8.56521739130435	83.2391304347826	48.3695652173913	33.3695652173913	45.6195652173913	62.8478260869565	64.6195652173913	44.0217391304348	45.6086956521739	28.1226373695652	2.36928546558731e-09	up-regulated
SEC31A	4476.89130434783	4590.52173913044	4841.47826086957	4506.4347826087	4890.88043478261	4928.76086956522	4803.10869565217	4538.39130434783	5048.83695652174	4811.52173913044	4497.01086956522	4205.02173913044	4761.75	4631.06521739131	4278.4347826087	4528.17391304348	4786.76086956522	4669.76086956522	4482.02173913043	4306.05434782609	4249.86956521739	5140.32608695652	5042.4347826087	4573	5307.98913043478	5286.5	4982.84782608696	5627.95652173913	5388.30434782609	4944.26086956522	5572.9347826087	5702.58695652174	6219.23913043478	4880.86956521739	5457.09782608696	5963.60869565217	6258.65217391304	5161.76086956522	6162.45652173913	5885.34782608696	5942.4347826087	5622.89130434783	5923.15217391304	5942.4347826087	5865.52173913044	5269.47826086957	5107.7573545	2.41511917624854e-09	up-regulated
AEN	1769.69565217391	1688.91304347826	1703.59782608696	1621.86956521739	1576.48913043478	1571.51086956522	1741.36956521739	1718.5652173913	1705.71739130435	1813.41304347826	1968.76086956522	1949.34782608696	2024.23913043478	1590.69565217391	1812.0652173913	1904.40217391304	1892.54347826087	1650.63043478261	1803.85869565217	1752.07608695652	2126.3152173913	1551.89130434783	1897.07608695652	1744.79347826087	1606.39130434783	1652.13043478261	1657.02173913043	1506.45652173913	1684.04347826087	1664.29347826087	1310.30434782609	1309.47826086957	1296.69565217391	1466.36956521739	1443.23913043478	1362.42391304348	1331.52173913043	1437.21739130435	1220.90217391304	1087.42391304348	1209.82608695652	1328.48913043478	1105.73913043478	1266.13043478261	1227.89130434783	1202.27173913044	1586.00211804348	2.47943751537894e-09	down-regulated
PXN	8555.15217391304	6784.10869565217	7819.36956521739	7010.73913043478	6977.97826086957	6724.08695652174	7862	6937.76086956522	15085.7608695652	7240.30434782609	6847.13043478261	5833.95652173913	14436.2826086957	9241.65217391304	9821.46739130435	7150.29347826087	12907.8695652174	11383.9130434783	12783.0434782609	8141.89130434783	12045.8043478261	13193.3043478261	11723.9565217391	9457.67391304348	14035.8695652174	12944.0434782609	10717.8695652174	14371.9347826087	13906	13434.5217391304	14722.9565217391	14035.8695652174	14082.4782608696	12535.9782608696	16674.5217391304	14722.9565217391	15559.9130434783	9814.15217391304	14082.4782608696	15292.2391304348	16513.7826086957	14997.7608695652	15804.847826087	13702.6086956522	15854.5652173913	16916.0652173913	11754.1070283913	2.47943751537894e-09	up-regulated
MAP7	3269.94565217391	3152.80434782609	3013.32608695652	3232.47826086957	3328.47826086957	3082.08695652174	2954.80434782609	3221.76086956522	1267.60869565217	2987.95652173913	3422.90217391304	4122.60869565217	1657.47826086957	2829	2979.39130434783	3752.73913043478	1809.41304347826	2272.91304347826	2417.60869565217	3308.04347826087	2154.54347826087	2086.71739130435	2299.02173913044	2898.21739130435	1627.60869565217	1836.54347826087	2304.78260869565	1307.28260869565	1623.84782608696	1790.38043478261	1260.51086956522	1353.39130434783	1321.13043478261	1959.94565217391	1369.64130434783	1129.91304347826	1091.5652173913	2427.55434782609	1294.82608695652	1185.80434782609	1200.36956521739	1251.17391304348	1264.04347826087	1251.17391304348	1197.61956521739	1325.4347826087	2171.66065691304	2.48678887971789e-09	down-regulated
KIF24	314.521739130435	403.913043478261	343.630434782609	366.804347826087	380.108695652174	345.5	334.152173913044	355.195652173913	214.54347826087	416.130434782609	356.695652173913	386	226.869565217391	379.489130434783	357.326086956522	340.380434782609	300.913043478261	337.119565217391	325.326086956522	322.586956521739	273.978260869565	268.5	287.880434782609	280	247.79347826087	270.630434782609	280.869565217391	209.891304347826	227.934782608696	257.869565217391	249.141304347826	230.119565217391	247.54347826087	317.95652173913	231.402173913044	258.380434782609	223.054347826087	299.95652173913	218.5	210.391304347826	223.913043478261	250.836956521739	198.826086956522	198.826086956522	170.173913043478	215.815217391304	286.030241826087	2.59968235169546e-09	down-regulated
DPYSL5	293.108695652174	288.108695652174	237.869565217391	260.108695652174	255.369565217391	229.554347826087	259.315217391304	256.434782608696	244.45652173913	199.076086956522	202.434782608696	289.173913043478	285.173913043478	197.826086956522	210.130434782609	279.521739130435	270.869565217391	205.5	263.739130434783	247.739130434783	224.45652173913	171.565217391304	216.04347826087	268.108695652174	192.869565217391	254.652173913044	234.108695652174	174.565217391304	217.239130434783	204.217391304348	203.478260869565	194.010869565217	208.586956521739	278.663043478261	190.065217391304	176.217391304348	154.913043478261	219.04347826087	130.847826086957	139.978260869565	169.663043478261	124.869565217391	112.728260869565	92.0434782608696	87.0652173913044	155.445652173913	212.41209823913	2.69641445529066e-09	down-regulated
ADAM12	281.760869565217	293.913043478261	360.326086956522	431.673913043478	392.652173913044	324.076086956522	357.402173913044	447.5	224.054347826087	353.728260869565	374.282608695652	472.04347826087	269.54347826087	322.586956521739	370.413043478261	401.652173913044	310.326086956522	296.978260869565	385.695652173913	410.217391304348	285.358695652174	229.945652173913	314.913043478261	385.782608695652	266.54347826087	313.771739130435	297.5	173.586956521739	232.5	255.086956521739	190.010869565217	174.565217391304	181.086956521739	301.130434782609	168.195652173913	132.5	137.478260869565	357.119565217391	144.369565217391	114.913043478261	131.184782608696	225.739130434783	99.3478260869565	114.760869565217	144.934782608696	181.695652173913	274.670607586957	2.71804774160748e-09	down-regulated
LTBP1	2133.42391304348	1844.17391304348	2114.86956521739	1773.80434782609	2391.65217391304	1968.0652173913	1857.02173913044	1788.26086956522	3407.08695652174	1886.97826086957	1941.4347826087	1967.02173913043	3169.5652173913	2271.59782608696	2212	1860.45652173913	2598.52173913044	2580.73913043478	2375.22826086957	2161.64130434783	2351.20652173913	2893.35869565217	2708.02173913044	2559.13043478261	2986.60869565217	2919.66304347826	2730.17391304348	3520.71739130435	2827.48913043478	2811.28260869565	3829.21739130435	3829.21739130435	3708.80434782609	2316.02173913044	4157.65217391304	4594.69565217391	3773.34782608696	2086.71739130435	4541.15217391304	4628.15217391304	4067.30434782609	3230.91304347826	5014.76086956522	3892.56521739131	3616.67391304348	3235.78260869565	2894.221172	2.81350479540817e-09	up-regulated
CDK2	1857.02173913044	1791.41304347826	1848.21739130435	2213.41304347826	1620.38043478261	1763.67391304348	1721.65217391304	2291.04347826087	1748.26086956522	1711.70652173913	2092.04347826087	2081.72826086957	1684.3152173913	1917.34782608696	2065.48913043478	2147.9347826087	1864.71739130435	1701.25	2012.53260869565	1871.21739130435	2010.38043478261	1633.47826086957	1915.54347826087	1823	1712.9347826087	1700.16304347826	1815.5	1566.15217391304	1710.9347826087	1855.97826086957	1355.25	1412.25	1371.04347826087	1654	1225.30434782609	1290.95652173913	1365.76086956522	1889.38043478261	1252.34782608696	1276.41304347826	1344.02173913044	1510.82608695652	1298.84782608696	1163.73913043478	1180.63043478261	1226.05434782609	1686.22281095652	2.89355214115977e-09	down-regulated
PCSK6	331.391304347826	402	408.826086956522	347.608695652174	360.891304347826	364.065217391304	419.641304347826	356.141304347826	651.391304347826	401.847826086957	353.29347826087	412.673913043478	584.29347826087	407.728260869565	510.304347826087	391.521739130435	493.5	471.445652173913	578.065217391304	489.586956521739	425.489130434783	562.152173913044	553.130434782609	608.902173913044	614.108695652174	639.326086956522	595.739130434783	630.913043478261	727.978260869565	622.608695652174	670.434782608696	751.858695652174	911.282608695652	432.663043478261	718.119565217391	822.79347826087	983.576086956522	416.608695652174	793.79347826087	934.20652173913	943.130434782609	607.195652173913	881.228260869565	853.391304347826	914.652173913043	594.152173913044	585.775048608696	2.99081742988264e-09	up-regulated
CACNG6	229.5	283.869565217391	217.913043478261	166.934782608696	190.010869565217	295.478260869565	246.173913043478	164.521739130435	133.630434782609	269.847826086957	234.195652173913	272.228260869565	134.130434782609	216.717391304348	180.608695652174	222.445652173913	151.847826086957	195.945652173913	190.967391304348	205.902173913044	164.880434782609	192.347826086957	192.45652173913	172.282608695652	139.282608695652	161.413043478261	143.673913043478	129.771739130435	129.869565217391	106.554347826087	97.6086956521739	145.673913043478	119.945652173913	102.913043478261	104.869565217391	132.5	122.652173913043	143.576086956522	67.0434782608696	108.326086956522	139.04347826087	81.3804347826087	60.8478260869565	124.891304347826	113.239130434783	96.2608695652174	162.960304847826	3.011998093342e-09	down-regulated
LYRM1	582.608695652174	473.271739130435	505.739130434783	664.891304347826	520.989130434783	570.282608695652	507.826086956522	716.695652173913	646.510869565217	491.369565217391	541.630434782609	705.891304347826	793.206521739131	509.79347826087	414.010869565217	672.239130434783	780.369565217391	499.913043478261	500	788.5	630.217391304348	619.5	552.423913043478	782.95652173913	698.804347826087	695.934782608696	833.695652173913	687.45652173913	830.891304347826	782.95652173913	781.54347826087	843.239130434783	891.336956521739	801.989130434783	830.25	637.25	804.45652173913	872.858695652174	970.326086956522	679.434782608696	816.119565217391	1189.28260869565	1042.5	1094.01086956522	981.521739130435	1312.52173913043	729.330812021739	3.09546779643895e-09	up-regulated
CACNG7	150.717391304348	165.641304347826	150.152173913043	188.782608695652	215	170.95652173913	156.54347826087	165.445652173913	89.5	146.119565217391	182.065217391304	175.934782608696	76.7717391304348	143.717391304348	125.597826086957	152.195652173913	95.7173913043478	101.45652173913	140.336956521739	142.347826086957	107.913043478261	121.45652173913	63.8478260869565	131.130434782609	86.2608695652174	84.4347826086957	127.04347826087	81.1521739130435	87.7934782608696	77.2173913043478	62.4130434782609	95.6086956521739	76.8913043478261	106.315217391304	78.1195652173913	106.652173913043	48.8804347826087	134.304347826087	51.6304347826087	60.9347826086957	65.6521739130435	72.5652173913043	67.0652173913044	66.6739130434783	55	52.4347826086957	110.965028869565	3.10784049041635e-09	down-regulated
TNFRSF21	1409.0652173913	1612.75	1529.60869565217	1628.30434782609	1273.4347826087	1546.5652173913	1632.34782608696	1604.58695652174	817.152173913044	1480.4347826087	1716.23913043478	1563.5652173913	1029.82608695652	1445.35869565217	1832.71739130435	1291.60869565217	945.04347826087	1268.14130434783	1552.76086956522	1033.63043478261	1307.28260869565	965.065217391304	1111.73913043478	971.597826086957	791.695652173913	923.5	786.239130434783	668.95652173913	913.913043478261	881.728260869565	662.054347826087	757	723	1092.84782608696	772.717391304348	626.239130434783	684.826086956522	1194.95652173913	555.195652173913	735.173913043478	791.554347826087	830.456521739131	628.913043478261	625.891304347826	733.565217391304	815.880434782609	1081.85066121739	3.17984813297286e-09	down-regulated
MIS18BP1	2417.60869565217	2569.94565217391	2526.28260869565	2810.69565217391	2772.08695652174	2749.71739130435	2578.67391304348	2771.0652173913	2158.73913043478	2687.95652173913	2394.63043478261	2796.02173913044	2081.72826086957	2720.13043478261	2765.65217391304	2846.71739130435	2586.8152173913	2472.5652173913	2856.36956521739	2744.65217391304	2458.9347826087	2404.80434782609	2407.45652173913	2509.73913043478	2428.6847826087	2418.96739130435	2470.34782608696	2353.69565217391	2219.30434782609	2438.14130434783	2022.54347826087	2093.15217391304	2257.72826086957	2337.52173913044	1865.44565217391	1871.53260869565	2187.57608695652	2546.65217391304	1916.3152173913	2194.71739130435	1932.39130434783	2216.19565217391	1836.32608695652	1890.5	1836.76086956522	1867.65217391304	2375.89437143478	3.20132807959014e-09	down-regulated
GNAZ	142.25	148.619565217391	114.195652173913	127.478260869565	135.086956521739	134.239130434783	133.521739130435	144.29347826087	125.108695652174	143.010869565217	108.5	157.282608695652	94.5	116.065217391304	110.184782608696	138.413043478261	121.239130434783	138.434782608696	147.032608695652	144.586956521739	132.815217391304	106.619565217391	111.717391304348	121.869565217391	97.304347826087	115.086956521739	120.413043478261	93.9239130434783	79.5217391304348	92.0652173913044	90.8695652173913	97.2391304347826	102.402173913043	105.04347826087	104.869565217391	100.815217391304	68.2282608695652	135.173913043478	74.0978260869565	76	98	82.5652173913043	75.9565217391304	75.2826086956522	72.7608695652174	74.7608695652174	111.509689152174	3.23072322278366e-09	down-regulated
MYO10	12003.6956521739	11094.652173913	12907.8695652174	13010.7391304348	15671.9782608696	11681.2391304348	11228.7826086957	13617.2173913043	6243.3152173913	11245.9565217391	12169.2608695652	12074.5652173913	7172.63043478261	10634.2173913043	11383.9130434783	10490.847826087	7987	9567.08695652174	10708.5434782609	10067.9347826087	9828.78260869565	8203.28260869565	8909.36956521739	8622.23913043478	7154.76086956522	8343.4347826087	8470.13043478261	6243.3152173913	6563.26086956522	6675.79347826087	7029.23913043478	6011.21739130435	5917.5652173913	7588.78260869565	6207.95652173913	6026.89130434783	5496.19565217391	8567.95652173913	6447.55434782609	6371.4347826087	5627.95652173913	7751.13043478261	6466.84782608696	5868.63043478261	6087.63043478261	6838.9347826087	8788.73354065217	3.23434540257967e-09	down-regulated
HLF	21.9782608695652	40.1521739130435	31.1521739130435	47.9347826086957	39.7391304347826	24.5434782608696	35.2608695652174	45.7173913043478	44.7391304347826	36.0108695652174	47.3478260869565	50.1304347826087	12.195652173913	42.2608695652174	51.5326086956522	49.6739130434783	26.6086956521739	31.6521739130435	49.8260869565218	64.6739130434783	19.7391304347826	25.25	29	32.804347826087	43.9347826086957	46.3913043478261	69.6304347826087	57.3586956521739	99.2065217391304	100.065217391304	59.0434782608696	68.3478260869565	95.2934782608696	75.8913043478261	41.9565217391304	67.0217391304348	91.5217391304348	86.3478260869565	90.1739130434783	143.271739130435	116.967391304348	110.25	93.2173913043478	107.597826086957	120.304347826087	87.1304347826087	60.2358202391304	3.24318557632768e-09	up-regulated
FBLN5	50.5978260869565	55.3695652173913	59.1304347826087	41.5217391304348	59.1304347826087	55.3695652173913	61.1086956521739	60.5	103.04347826087	67.0760869565217	53.75	57.2608695652174	77.9239130434783	60.5	57.4565217391304	57.2391304347826	71.7065217391304	61.3369565217391	51.0869565217391	49.5652173913044	53.3695652173913	63.1304347826087	63.8478260869565	89.3260869565217	79.2391304347826	84.4347826086957	70.6521739130435	91.9565217391304	89.4130434782609	87.1521739130435	110.934782608696	90.5869565217391	90.6521739130435	65.0217391304348	112.195652173913	113.5	92.4130434782609	68.6521739130435	119.119565217391	103.04347826087	125.728260869565	99.9565217391304	138.967391304348	94.4130434782609	93.5869565217391	105.847826086957	78.4307678478261	3.24693396369929e-09	up-regulated
PTK6	26.4130434782609	30.2173913043478	33.1847826086957	34.6086956521739	28.3152173913044	32.9347826086957	45.6086956521739	39.1304347826087	49.0652173913044	29.3913043478261	31.1521739130435	27.75	54.7391304347826	27.2608695652174	26.4130434782609	31.8695652173913	47.9130434782609	32.804347826087	44.7608695652174	45.0434782608696	46.4456521739131	44.0652173913044	46.7173913043478	45.8913043478261	46.4021739130435	42.5217391304348	49.6521739130435	49.5	46.1739130434783	45.5760869565217	60.2282608695652	41.3913043478261	48.5108695652174	64.25	51.8152173913044	62.4347826086957	61.5	48.5869565217391	58.7282608695652	53.0652173913044	72.5434782608696	40.0978260869565	72.0869565217391	64.6195652173913	58.2391304347826	62.6956521739131	45.702505	3.25933091828339e-09	up-regulated
CCDC198	144.739130434783	173.826086956522	200.978260869565	192.347826086957	154.108695652174	193.065217391304	183.358695652174	195.195652173913	57.9565217391304	138.630434782609	133.630434782609	154.021739130435	60.4130434782609	126.282608695652	139.413043478261	133.173913043478	105.586956521739	96.8260869565217	81.554347826087	106.913043478261	108.717391304348	81.8478260869565	94.304347826087	81.7282608695652	72.0326086956522	52.3695652173913	50.5869565217391	58.1195652173913	70.6521739130435	62.6086956521739	38.8804347826087	46.8260869565217	50.7173913043478	87.3695652173913	28.6739130434783	38.7608695652174	35.5108695652174	127.586956521739	40.0978260869565	45.7826086956522	40.9130434782609	37.9130434782609	30.4347826086957	55.7608695652174	59.1847826086957	39.1413043478261	93.6639877608696	3.32041952551061e-09	down-regulated
ZBTB16	0	0	0	0	0	0	0	0	5.93478260869565	0	0	0	4.95652173913044	1.06521739130435	0	0	3.04347826086957	3.39130434782609	1.02173913043478	0.956521739130435	2.06521739130435	2	5.54347826086957	4.86956521739131	11.2826086956522	0	7.89130434782609	8.89130434782609	4.73913043478261	3.80434782608696	4.65217391304348	12.1304347826087	4.1304347826087	6.06521739130435	12.6086956521739	9.10869565217391	2.06521739130435	0.956521739130435	9.91304347826087	16.9347826086957	25.8695652173913	10.9130434782609	14.804347826087	12.1739130434783	13.8695652173913	14.1739130434783	5.25708898695652	3.45428705976788e-09	up-regulated
LINC02086	329.086956521739	347.054347826087	385.108695652174	452.336956521739	413.54347826087	350.586956521739	354.54347826087	468.95652173913	432.391304347826	395.782608695652	446.108695652174	467.630434782609	559.521739130435	381.217391304348	389.826086956522	461.978260869565	458.086956521739	314.163043478261	420.434782608696	384.847826086957	481.586956521739	333.097826086957	371.913043478261	392.608695652174	332.04347826087	357.695652173913	363.097826086957	286.815217391304	315.597826086957	286.173913043478	232.086956521739	209.108695652174	247.54347826087	427.565217391304	304.326086956522	247.152173913043	237.5	336.836956521739	201.369565217391	172.684782608696	197.239130434783	264.869565217391	185.978260869565	187.282608695652	178.913043478261	232.782608695652	339.066873934783	3.46210921137294e-09	down-regulated
ATP1A1	6177.47826086957	5801.60869565217	5727.86956521739	4328.25	5661.63043478261	5713.67391304348	6196.13043478261	4241.08695652174	13857.4565217391	7029.23913043478	6895.4347826087	5779.28260869565	12783.0434782609	10559.8695652174	9567.08695652174	7599.73913043478	10117.4565217391	12810.3695652174	10953.4347826087	8368.19565217392	9338	12026.8260869565	11035.5217391304	9896.73913043478	12103.6304347826	11516.3913043478	9828.78260869565	13263.9347826087	11322.3260869565	10335.2826086957	15112.1086956522	15760.3043478261	16227.7608695652	7130.10869565217	17763.152173913	18721.2826086957	16170.5869565217	5617.32608695652	17422.8913043478	18721.2826086957	19122.3695652174	12715.7391304348	21879.4565217391	18345.152173913	16982.5869565217	12995.8260869565	11337.4719112391	3.48091038797611e-09	up-regulated
NSD2	2917.84782608696	2976.5652173913	3133.76086956522	2877.13043478261	3289.95652173913	3097.25	3107.91304347826	2790.36956521739	2842.86956521739	2916.60869565217	2850.97826086957	2835.45652173913	2982.21739130435	3285.19565217391	3198.29347826087	3007	2954.80434782609	3272.47826086957	3301.19565217391	2846.71739130435	3025.60869565217	2997.58695652174	2778.10869565217	2736.30434782609	2816.36956521739	2886.19565217391	2602.86956521739	2655	2496.17391304348	2383.86956521739	2597.9347826087	2629.80434782609	2715.52173913044	2539.19565217391	2368.13043478261	3144.58695652174	2524.55434782609	2680.84782608696	2350.76086956522	2674.73913043478	2449.07608695652	2193.54347826087	2431.32608695652	2156.95652173913	1893.34782608696	1945.47826086957	2764.3152173913	3.48945283738843e-09	down-regulated
NUP205	6211.09782608696	6169.86956521739	6306.63043478261	6776.15217391304	6502.08695652174	6113.20652173913	5868.63043478261	6712.45652173913	5584.63043478261	6294.17391304348	6383.69565217391	6640.34782608696	5917.5652173913	6110.63043478261	6487.9347826087	6797.39130434783	6060.76086956522	6169.86956521739	6551.15217391304	6423.36956521739	6080.45652173913	6095.10869565217	6475.13043478261	6443.02173913044	5862.41304347826	6132.0652173913	6273.86956521739	5524.76086956522	5878.63043478261	6219.23913043478	5622.89130434783	5278.5	5204.85869565217	6336.11956521739	5465.15217391304	5378.04347826087	5250.26086956522	6452.08695652174	4987.71739130435	4830.52173913044	4833.91304347826	5745.0652173913	4447.78260869565	4571.3152173913	4620.30434782609	5291.04347826087	5899.60702269565	3.48945283738843e-09	down-regulated
CENPN	2461.0652173913	2804.28260869565	2497.10869565217	2336.0652173913	2444.01086956522	2699.02173913044	2263.45652173913	2201.84782608696	2004.10869565217	2297.66304347826	2336.9347826087	2900.76086956522	2319.34782608696	2714.52173913044	3253.82608695652	2903.73913043478	2728.51086956522	2518.80434782609	2883.65217391304	2811.28260869565	2674.73913043478	2502.84782608696	2488.21739130435	2592.89130434783	2351.20652173913	2485.56521739131	2238.17391304348	2169.76086956522	2597	2486.86956521739	1939.33695652174	1890.8152173913	1840.76086956522	2161.21739130435	1952.07608695652	1702.13043478261	1684.3152173913	2143.14130434783	1528.8152173913	1732.80434782609	1592.28260869565	1642.69565217391	1258.3152173913	1389.67391304348	1453.29347826087	1446.4347826087	2246.20413421739	3.54259411804913e-09	down-regulated
SLC3A1	100.065217391304	108.141304347826	121.510869565217	132.934782608696	97.7391304347826	115.086956521739	98.8913043478261	132.815217391304	109.358695652174	152.75	109.771739130435	169.586956521739	93.1847826086957	134.717391304348	130.260869565217	158.423913043478	126.934782608696	94.695652173913	116.413043478261	127.260869565217	130.79347826087	99.1413043478261	126.934782608696	102.608695652174	80.1956521739131	67.1195652173913	71.6086956521739	70.2826086956522	89.4130434782609	103.95652173913	57.5434782608696	68.3478260869565	64.5760869565217	94.695652173913	63.4347826086957	41.0434782608696	48.8804347826087	130.391304347826	41.3695652173913	37.2608695652174	36.3913043478261	55.6413043478261	34.9130434782609	41.8695652173913	27.9130434782609	67.7608695652174	93.1441420434783	3.54259411804913e-09	down-regulated
BRIP1	1066.13043478261	1332.84782608696	1172.67391304348	1293.55434782609	1457.10869565217	1247.84782608696	1043.07608695652	1254.36956521739	1135.0652173913	1530.86956521739	1514.21739130435	1712.34782608696	1279.28260869565	1636.71739130435	1619.25	1802.89130434783	1587.89130434783	1302.05434782609	1488.36956521739	1544.67391304348	1337.03260869565	1247.41304347826	1412.80434782609	1476.72826086957	1245.10869565217	1177.19565217391	1441.26086956522	1076.45652173913	1196.23913043478	1358.67391304348	708.478260869565	715.815217391304	657.771739130435	1041.16304347826	583.891304347826	675.032608695652	679.652173913044	1111.54347826087	607.956521739131	601.04347826087	511.260869565217	729.5	528.510869565217	564.826086956522	490.086956521739	614.217391304348	1126.32394532609	3.56475740754248e-09	down-regulated
TRAM2	1840.51086956522	1591.01086956522	1926.30434782609	1856.32608695652	1927.15217391304	1682.10869565217	1695.44565217391	1865.78260869565	3148.80434782609	1686.30434782609	1821.54347826087	1807.58695652174	3100.9347826087	2097.91304347826	2252.82608695652	2321.96739130435	3046	2368.64130434783	2698.45652173913	2455.47826086957	2534.66304347826	2875.27173913044	2823.69565217391	2813.04347826087	3202.02173913044	3321.09782608696	3265.97826086957	3269.04347826087	3370.91304347826	3309.89130434783	3189.08695652174	3543.86956521739	3831.76086956522	2904.97826086957	3352.96739130435	3393.0652173913	3705.47826086957	2729.69565217391	3323.80434782609	3587.04347826087	3778.96739130435	3504	3379.69565217391	2886.19565217391	3354.70652173913	3258.9347826087	2776.10795841304	3.57550871797181e-09	up-regulated
NRCAM	14486.8260869565	13193.3043478261	12411.8913043478	13808.2608695652	15059.4130434783	12715.7391304348	12137.2173913044	14242.0543478261	21640.4782608696	13667.2173913043	13906	16841.8695652174	20764.847826087	12980.9130434783	13307.8695652174	16299.8913043478	17597.0869565217	16040.2608695652	15854.5652173913	19607.1086956522	14824.4565217391	19405.8260869565	18530.8695652174	22745.7173913044	19829.4347826087	19829.4347826087	22891.1739130435	21116.0869565217	22109.4782608696	23522.6086956522	22891.1739130435	23656.0434782609	23656.0434782609	19122.3695652174	24960.2608695652	22475.0217391304	23043.5652173913	16916.0652173913	24809.4565217391	23921.5434782609	21116.0869565217	24087.4347826087	24234.6956521739	21640.4782608696	21494.6956521739	24234.6956521739	18991.9031663478	3.57841852876549e-09	up-regulated
LINC01842	30.2717391304348	15.0217391304348	20.3913043478261	19.2826086956522	5.89130434782609	24.5434782608696	20.5652173913043	29.0434782608696	29.6086956521739	24.8695652173913	24.2608695652174	16.0652173913044	30.6739130434783	15.8913043478261	17.6739130434783	20.6847826086957	24.0217391304348	26.1304347826087	29.6739130434783	23	32.3260869565217	20.1086956521739	29.9782608695652	25.1847826086957	21.7391304347826	29.6739130434783	43.5	27.195652173913	24.3260869565217	36.9130434782609	37.6956521739131	46.8260869565217	40.7173913043478	43.0434782608696	45.6304347826087	45.8913043478261	45.6304347826087	27.6521739130435	52.8260869565218	41.2608695652174	43.1304347826087	37	65.0760869565217	54.804347826087	35.9021739130435	40.0652173913044	31.3405006086957	3.59854164175962e-09	up-regulated
TCF19	363.934782608696	447.95652173913	368.478260869565	413.760869565217	405.413043478261	388.108695652174	375.880434782609	411.652173913043	367.239130434783	472.576086956522	431.25	341.5	427.141304347826	469.04347826087	409.641304347826	380	403.858695652174	473.076086956522	381.826086956522	359.217391304348	461.086956521739	439.391304347826	466.565217391304	353.95652173913	400.891304347826	361.130434782609	363.934782608696	420.434782608696	386.369565217391	345.434782608696	265.95652173913	334.804347826087	302.195652173913	348.326086956522	273.586956521739	282.684782608696	287.869565217391	384.75	212.239130434783	242.141304347826	201.369565217391	342.75	183.065217391304	171.652173913043	210.978260869565	210.978260869565	355.349955326087	3.78505444592847e-09	down-regulated
PPA1	8481.02173913043	8511.21739130435	8072.45652173913	8655.41304347826	7971.71739130435	8524.04347826087	8828.73913043478	8814.32608695652	14371.9347826087	10078.152173913	8643.65217391304	6718.32608695652	11472.9347826087	8694	7828.30434782609	7510.17391304348	11265.4347826087	9613.60869565217	8355.36956521739	8762.34782608696	11845.6086956522	10446.1304347826	11118.1956521739	9381.80434782609	11208.9782608696	11666.4456521739	10301.8043478261	12470.4782608696	11769	12003.6956521739	12980.9130434783	12230.2608695652	12682.9782608696	10367.0434782609	11940.9565217391	11834.8043478261	14609.7826086957	9500.5	13808.2608695652	11624.7826086957	12980.9130434783	14766.652173913	12137.2173913044	15175.1956521739	16104.7391304348	16299.8913043478	10922.3956465217	3.81867042363521e-09	up-regulated
RHPN2	3524.45652173913	3170.47826086957	2959.96739130435	2633.0652173913	3346.0652173913	3180.47826086957	3004.90217391304	2682.9347826087	2236.32608695652	3029.39130434783	3318.30434782609	3106.52173913044	2478.91304347826	2256.84782608696	2500.96739130435	2537.36956521739	2268.36956521739	2429.67391304348	2173.55434782609	2384.86956521739	2618.91304347826	2257.21739130435	2618.28260869565	2429.67391304348	2327.5	2413.58695652174	2427.55434782609	2326.65217391304	2401.95652173913	2315.04347826087	2265.65217391304	2229.95652173913	2281.10869565217	2349.65217391304	2269.5652173913	2275.02173913044	2016.07608695652	2431.32608695652	2092.80434782609	1925.60869565217	1916.08695652174	1869.4347826087	2089.98913043478	1986.80434782609	1932.39130434783	1883	2460.31120606522	3.83186307908834e-09	down-regulated
ARHGAP29	3958.04347826087	4061.21739130435	4165.0652173913	4304.78260869565	3903	3958.04347826087	3797.30434782609	4395.79347826087	3116.58695652174	4421.09782608696	4714.02173913044	4786.76086956522	3461.23913043478	2877.70652173913	3524.45652173913	3979.13043478261	3431.63043478261	2608.5	3294.19565217391	3705.47826086957	3955.82608695652	2842.86956521739	3112.02173913044	3346.0652173913	2655.48913043478	2792.5	3156.34782608696	2445.54347826087	2906.39130434783	2982.21739130435	2390.73913043478	2237.26086956522	2312.54347826087	2939.67391304348	2430.70652173913	1785.28260869565	2148.78260869565	3194.15217391304	2140.26086956522	1844.84782608696	2181.95652173913	2885.02173913044	2056.76086956522	2226.86956521739	2670.9347826087	3085.73913043478	3156.32303584783	3.86766190333554e-09	down-regulated
MTFR1L	788.304347826087	825.880434782609	767.934782608696	722.032608695652	747.413043478261	769.021739130435	750.684782608696	724.413043478261	968.478260869565	761.380434782609	685.282608695652	723.54347826087	880.945652173913	607.956521739131	625.673913043478	765.065217391304	829.804347826087	732.891304347826	589.282608695652	739.673913043478	934.304347826087	833.065217391305	826.141304347826	749.336956521739	763.336956521739	795.891304347826	720.054347826087	887.021739130435	897.739130434783	780.695652173913	1047.5	854.652173913044	932.04347826087	926.956521739131	1096.5652173913	1032.08695652174	1109.01086956522	881.728260869565	1109.19565217391	925.771739130435	982.902173913044	1011.73913043478	1184.45652173913	1124.5652173913	1023.40217391304	1165.64130434783	860.901480695652	3.87067218172477e-09	up-regulated
PRKAG2	1320.77173913043	905.673913043478	933.913043478261	1230.45652173913	966.967391304348	955.782608695652	1028.84782608696	1324.0652173913	2722.16304347826	1051.33695652174	1112.60869565217	1154.19565217391	2474.89130434783	1118.26086956522	1117.36956521739	1144.21739130435	1995.32608695652	1275.10869565217	1413.73913043478	1382.23913043478	1679.73913043478	1537.84782608696	1690.54347826087	1621.61956521739	1649.60869565217	1814.26086956522	1904.80434782609	1881.4347826087	2272.47826086957	1930.95652173913	2194.71739130435	2026.52173913043	2011.04347826087	2010.0652173913	2302.86956521739	2083.45652173913	2213.89130434783	1580.5652173913	2419.97826086957	2048.23913043478	2433.32608695652	2721.58695652174	2580.73913043478	2318.25	2396.80434782609	2870.03260869565	1757.02858221739	4.00927843585803e-09	up-regulated
GJC1	2549.34782608696	2508.45652173913	2540.45652173913	3215.0652173913	2752.96739130435	2584.04347826087	2347.78260869565	3394.97826086957	2204.36956521739	2499.47826086957	2459.39130434783	2982.21739130435	2392.14130434783	2300	2363.40217391304	2962.08695652174	2646.5	2275.02173913044	2723.5652173913	2991.34782608696	2512.84782608696	2393.89130434783	2212	2777.60869565217	2297.66304347826	2198.76086956522	2619.5652173913	1835.36956521739	1908.5	2175	1792.39130434783	1756.65217391304	1706.26086956522	2438.14130434783	1795.89130434783	1449.76086956522	1389.26086956522	2635.02173913044	1456.65217391304	1439.27173913043	1398.69565217391	2196.78260869565	1334.58695652174	1323.8152173913	1353.39130434783	1873.89130434783	2238.35422017391	4.00927843585803e-09	down-regulated
EME1	342.880434782609	367.608695652174	357.326086956522	355.434782608696	304.489130434783	408.826086956522	347.010869565217	336.054347826087	217.282608695652	382.521739130435	372.326086956522	289.173913043478	251.782608695652	396.608695652174	339.20652173913	318.739130434783	305.760869565217	370.95652173913	254.45652173913	323.760869565217	373.086956521739	329.04347826087	307.413043478261	253.913043478261	287.847826086957	273.586956521739	288.25	285.978260869565	254.554347826087	290.086956521739	258.739130434783	256.586956521739	236.304347826087	285.217391304348	203.347826086957	234.108695652174	244.369565217391	379	167.923913043478	201.739130434783	191.836956521739	217.717391304348	131.467391304348	201.565217391304	146.195652173913	144.391304347826	284.488659586957	4.00927843585803e-09	down-regulated
TFAM	4759.80434782609	5529.97826086957	4987.71739130435	5785.58695652174	5295.9347826087	5524.76086956522	5136.45652173913	5789.91304347826	4960.23913043478	5613.02173913044	5584.63043478261	5622.89130434783	4877.27173913044	5138.39130434783	4708.14130434783	5544.80434782609	5740.84782608696	5154.65217391304	4914.28260869565	5393.91304347826	5721.0652173913	4882.63043478261	5100.17391304348	5413.21739130435	4992.41304347826	5314.0652173913	5167.52173913044	4710.32608695652	5066.5	5163.73913043478	4387.21739130435	4317.9347826087	4398.38043478261	4467.73913043478	3770.02173913044	4043.09782608696	4333.0652173913	5001.16304347826	4142.89130434783	3712.10869565217	4119.67391304348	4924.67391304348	3605.76086956522	4193	3845.45652173913	4237.58695652174	4893.36223530435	4.13054386095988e-09	down-regulated
ASB1	1155.57608695652	1229.13043478261	1247.02173913043	1133.52173913043	1133.95652173913	1170.1847826087	1221.8152173913	1209.45652173913	1140.28260869565	1266.98913043478	1172.4347826087	1023.40217391304	1055.17391304348	1208.76086956522	1225.89130434783	1068.95652173913	1137.95652173913	1308.58695652174	1315.5652173913	1111.0652173913	1141.61956521739	1160.5	1234.66304347826	1120.25	1139.58695652174	1168.46739130435	1046.63043478261	1054.9347826087	1091.21739130435	1062.75	890.054347826087	993.782608695652	958.347826086957	985.20652173913	896.260869565217	1078.67391304348	920.826086956522	1103.51086956522	895.782608695652	1034.60869565217	907.956521739131	939.673913043478	869.565217391304	938.260869565217	927.5	877.760869565218	1086.39392719565	4.16460425449993e-09	down-regulated
COQ8B	477.869565217391	535.847826086957	461.978260869565	396.130434782609	468.25	445.021739130435	497.934782608696	396.913043478261	737.108695652174	584.076086956522	527.869565217391	510.565217391304	644.521739130435	663.934782608696	607.010869565217	675.967391304348	612.434782608696	809.891304347826	624.684782608696	666.695652173913	541.847826086957	784.260869565217	730.826086956522	765.195652173913	776.326086956522	772.369565217391	689.25	895.260869565218	804.152173913044	684.652173913044	842.271739130435	977.510869565217	837.076086956522	620.130434782609	859.95652173913	1055.58695652174	920.826086956522	562.434782608696	967.086956521739	1066.13043478261	1061.63043478261	641.891304347826	1091.91304347826	1053.96739130435	904.239130434783	741.608695652174	717.241476130435	4.16460425449993e-09	up-regulated
NCAPG2	3660.5	3850.91304347826	3472.80434782609	3892.56521739131	3917.71739130435	3636.78260869565	3438.89130434783	4064.10869565217	3802.73913043478	4187.5652173913	4196.21739130435	3686.73913043478	3614.26086956522	3735.41304347826	3614.26086956522	3588.9347826087	3669.19565217391	3917.71739130435	3612.26086956522	3845.45652173913	3790.04347826087	3667.02173913044	4001.23913043478	3660.5	3845.45652173913	3604.55434782609	3915.41304347826	3636.78260869565	3477.28260869565	3716.86956521739	3352.17391304348	3321.09782608696	3349.9347826087	3563.80434782609	2943.04347826087	3379.69565217391	2944.55434782609	3793.60869565217	2793.23913043478	2517.97826086957	2627.5	3439.73913043478	2349.15217391304	2665.79347826087	2525.17391304348	2980.86956521739	3505.8166388913	4.22459409440133e-09	down-regulated
WIPI1	215	180.608695652174	187.282608695652	120.586956521739	180.29347826087	181.869565217391	180.29347826087	124.565217391304	239.847826086957	156.717391304348	175.260869565217	200.760869565217	221.934782608696	145.70652173913	176.934782608696	173.130434782609	194.260869565217	197.347826086957	145.673913043478	183.326086956522	196.326086956522	247.891304347826	225.04347826087	246.20652173913	266.54347826087	190.967391304348	264.130434782609	256.826086956522	246.173913043478	234.130434782609	260.195652173913	298.54347826087	304.326086956522	232.326086956522	321.630434782609	276.630434782609	280.891304347826	158.521739130435	295.086956521739	270.29347826087	297.5	238.815217391304	304.434782608696	306.728260869565	334.021739130435	284.141304347826	226.515832021739	4.26421918598658e-09	up-regulated
SQSTM1	16982.5869565217	17044.0652173913	17129.3695652174	18085.8913043478	14824.4565217391	16104.7391304348	18530.8695652174	17920.8043478261	7622.95652173913	15854.5652173913	16841.8695652174	13348.1956521739	8721.9347826087	15342.9565217391	17597.0869565217	11877.7391304348	9613.60869565217	11834.8043478261	15059.4130434783	9338	12258.8913043478	9711.0652173913	9525.9347826087	7819.36956521739	7599.73913043478	7996.71739130435	6945.60869565217	7196.9347826087	7154.76086956522	6794.19565217391	5990.20652173913	6411.15217391304	6537.0652173913	9681.41304347826	6847.13043478261	6575.26086956522	6190.13043478261	9643.4347826087	5925.20652173913	7966.67391304348	8120.17391304348	5432.95652173913	7172.63043478261	6981.21739130435	7172.63043478261	5862.41304347826	10547.5832731522	4.32061160946718e-09	down-regulated
IFT57	722.5	714.282608695652	727.673913043478	684.413043478261	775.586956521739	699.282608695652	749.826086956522	703.717391304348	757.369565217391	792.086956521739	729.619565217391	692.217391304348	796.434782608696	774.760869565218	811.130434782609	633.804347826087	719.978260869565	683.565217391304	708.673913043478	592.586956521739	728.282608695652	659.673913043478	739.673913043478	641.076086956522	582.510869565217	607.380434782609	595.739130434783	563.5	613.173913043478	531.119565217391	598.195652173913	549.923913043478	600.880434782609	666.032608695652	641.608695652174	644.521739130435	507.478260869565	644.326086956522	603.402173913044	499.826086956522	574.804347826087	557.152173913044	615.391304347826	449.891304347826	517.260869565217	526.597826086957	650.62901573913	4.33398843898066e-09	down-regulated
CCN4	32.804347826087	32.3260869565217	18.3913043478261	15.2391304347826	21.3478260869565	14.8695652173913	19.1521739130435	16.8152173913044	54.804347826087	29.3913043478261	17.6739130434783	25.8913043478261	31.8913043478261	51.3260869565217	42.6304347826087	40.0760869565217	40.2934782608696	67.3369565217391	63.4347826086957	63.3260869565217	44.2282608695652	78.804347826087	56.0217391304348	62.9347826086957	73.0652173913044	52.3695652173913	75.8260869565217	60.8260869565218	62.7934782608696	66.9782608695652	90.8695652173913	92.5760869565218	87.304347826087	35.7391304347826	107.54347826087	73.0108695652174	93.4239130434783	25.8695652173913	90.1739130434783	110.663043478261	109.413043478261	82.5652173913043	81.5217391304348	92.0434782608696	84.7608695652174	73.7391304347826	57.9149319130435	4.36692737193749e-09	up-regulated
IVNS1ABP	6003.19565217391	5225.05434782609	5278.5	4759.80434782609	4726.08695652174	5116.02173913044	5409.5	4679.95652173913	4952.78260869565	5511.13043478261	5188.57608695652	4518.4347826087	5046.9347826087	5702.58695652174	5351.08695652174	4414	4415.33695652174	4875.4347826087	5038.15217391304	3737.69565217391	4773.0652173913	4452.16304347826	4295.9347826087	3754.91304347826	4019.97826086957	3934.3152173913	3400.04347826087	4085.51086956522	4057.66304347826	3687.79347826087	3801.45652173913	3692.48913043478	3646.77173913044	4011.13043478261	4726.08695652174	3869.5	4134.19565217391	3755.86956521739	3639.10869565217	3992.67391304348	4186.13043478261	3149.52173913044	3677.8152173913	3210.28260869565	3390.13043478261	3515.4347826087	4365.4402165	4.40949510328984e-09	down-regulated
SPOP	1341.83695652174	1313.91304347826	1295.85869565217	1344.85869565217	1165.20652173913	1181.63043478261	1278.02173913044	1396.72826086957	1418.41304347826	1229.13043478261	1269.80434782609	1146.01086956522	1542.92391304348	1270.95652173913	1153.48913043478	1193.01086956522	1549.60869565217	1339.39130434783	1271.41304347826	1298.45652173913	1386.26086956522	1572.59782608696	1442.34782608696	1340.03260869565	1474	1430.26086956522	1485.60869565217	1605.35869565217	1534.80434782609	1432.15217391304	1668.5652173913	1718.5652173913	1738.82608695652	1354.92391304348	1744.1847826087	1740.19565217391	1778.25	1409.89130434783	1731.23913043478	1598.02173913043	1677.86956521739	1852.8152173913	1579.9347826087	1695.21739130435	1583.04347826087	1743.84782608696	1463.46695558696	4.48633501744287e-09	up-regulated
PADI3	34.4239130434783	42.1630434782609	46.4021739130435	30.7608695652174	32.4782608695652	48.1304347826087	65.4347826086957	42.804347826087	22.5217391304348	46.6304347826087	26.4782608695652	22.804347826087	20.7391304347826	48.054347826087	37.2173913043478	42.9130434782609	35.1304347826087	36.2282608695652	40.1195652173913	14.8695652173913	19.7391304347826	30.2608695652174	26.3478260869565	30.8913043478261	31.3913043478261	20.4565217391304	14.195652173913	18.6086956521739	24.3260869565217	32.7826086956522	16.0869565217391	15.804347826087	15.0217391304348	23.6521739130435	9.08695652173913	7.10869565217391	12.1739130434783	23.1086956521739	15.9130434782609	9.01086956521739	15.5434782608696	9.93478260869565	4.71739130434783	5	6.84782608695652	9.18478260869565	25.7282609782609	4.53176399121574e-09	down-regulated
HHIP	52.5217391304348	43.9347826086957	59.1304347826087	56.6304347826087	39.7391304347826	49.0652173913044	45.6086956521739	53.3695652173913	29.6086956521739	61.5217391304348	65.9782608695652	84.0652173913044	56.0217391304348	50.2608695652174	50.3478260869565	75.8260869565217	51.2934782608696	27.4782608695652	51.0869565217391	62.1956521739131	39.0652173913044	36.2391304347826	57.9239130434783	52.5652173913044	46.4021739130435	44.4130434782609	46.6739130434783	46.6413043478261	53.1521739130435	36.9130434782609	23.4239130434783	25.695652173913	22.3695652173913	30.4130434782609	14.8913043478261	21.304347826087	16.0869565217391	38.2826086956522	20.7173913043478	14.8913043478261	9.76086956521739	29.0217391304348	11.3478260869565	12.1739130434783	8.78260869565217	19.8913043478261	40.1027881304348	4.53282613856456e-09	down-regulated
KNTC1	3647.54347826087	4687.8152173913	4999.41304347826	5298.25	5071.58695652174	5087.86956521739	4323.73913043478	5042.4347826087	3722.67391304348	5014.76086956522	4521.52173913044	4384.15217391304	3493.61956521739	4669.76086956522	4333.0652173913	4699.5652173913	4144.03260869565	4535.13043478261	4387.21739130435	4732.82608695652	3735.41304347826	4390.47826086957	4243.95652173913	4010.05434782609	4737.4347826087	3998.4347826087	4355.63043478261	4171.4347826087	4180.69565217391	4486.39130434783	3573.4347826087	3820.19565217391	3584.86956521739	4447.78260869565	2809.34782608696	3341.73913043478	3613.26086956522	4780.04347826087	2854.53260869565	3115.21739130435	2943.04347826087	3337.47826086957	2449.07608695652	2838.55434782609	2747.04347826087	2804.28260869565	4047.10439513044	4.57397486095534e-09	down-regulated
VANGL2	229.5	235.5	202.5	229.086956521739	209.695652173913	195.20652173913	192.684782608696	246.434782608696	126.021739130435	187.217391304348	196.891304347826	214.913043478261	143.804347826087	163.217391304348	203.978260869565	189.510869565217	154.130434782609	155.130434782609	210.576086956522	145.826086956522	126.065217391304	146.239130434783	155.445652173913	133.608695652174	119.119565217391	141.673913043478	135.630434782609	107.163043478261	99.2065217391304	156.260869565217	125.565217391304	112.510869565217	112.130434782609	169.663043478261	131.304347826087	130.663043478261	105.586956521739	156.891304347826	99.9565217391304	105.54347826087	132.173913043478	92.3913043478261	143.95652173913	90.0217391304348	85.9021739130435	110.076086956522	153.403827478261	4.6762674044393e-09	down-regulated
BCO2	27.3478260869565	38.2826086956522	25.2391304347826	23.0869565217391	32.4782608695652	24.5434782608696	37.0326086956522	22.9130434782609	30.9130434782609	33.2608695652174	30.0217391304348	32.9021739130435	37.6739130434783	28.6086956521739	43.9456521739131	26.1304347826087	36.2173913043478	39.8695652173913	34.4347826086957	21.9565217391304	32.3260869565217	37.9347826086957	45.7173913043478	28.8478260869565	34.6304347826087	42.5217391304348	35.2608695652174	50.3478260869565	49.7934782608696	44.4673913043478	57.5434782608696	83.5326086956522	58.8369565217391	29.6086956521739	48.7934782608696	92.3695652173913	110.663043478261	30.6739130434783	59.8586956521739	97.2608695652174	118.195652173913	78.8586956521739	82.5652173913043	133.478260869565	127.923913043478	63.5217391304348	50.0519856739131	4.75667520793478e-09	up-regulated
PGBD4	279.521739130435	286.652173913044	315.402173913044	310.565217391304	244.086956521739	269.804347826087	276.70652173913	342.95652173913	323.5	278.695652173913	262.130434782609	286.891304347826	255.369565217391	262.021739130435	323.54347826087	327.739130434783	287.119565217391	283.869565217391	292.04347826087	297.673913043478	215.282608695652	338.586956521739	357.75	312.260869565217	346.978260869565	327.369565217391	411.347826086957	377.673913043478	460.760869565217	417.369565217391	339.902173913044	389.076086956522	352.967391304348	375.065217391304	365.913043478261	370.130434782609	412.869565217391	334.891304347826	378.130434782609	525.717391304348	421.5	400.847826086957	412.152173913043	450.869565217391	437.739130434783	429.5	342.803163978261	4.8005253148408e-09	up-regulated
CENPV	1135.34782608696	1053.80434782609	928.45652173913	968.913043478261	1044.39130434783	1023.40217391304	1024.59782608696	921.195652173913	1065.30434782609	1016.02173913043	1135.58695652174	1087.70652173913	1152.02173913043	1231.69565217391	1130.97826086957	1064.80434782609	1060.69565217391	1077.47826086957	1122.4347826087	1038.5	1175.92391304348	1004.33695652174	1009.0652173913	977.510869565217	899.521739130435	965.989130434783	916.021739130435	912.29347826087	988.782608695652	832.945652173913	863.891304347826	798.065217391304	773.25	874.326086956522	911.282608695652	970.684782608696	778.902173913044	877.304347826087	842.521739130435	753.195652173913	801.989130434783	750.782608695652	907.304347826087	703.79347826087	643.173913043478	734.956521739131	955.459828826087	4.92873784217312e-09	down-regulated
PHLDB1	269.673913043478	276.891304347826	322.869565217391	290.076086956522	309.282608695652	284.54347826087	314.75	216.152173913043	214.54347826087	281.760869565217	261.086956521739	277.5	241.717391304348	331.260869565217	262.902173913044	268.630434782609	259.04347826087	250.282608695652	222.826086956522	246.434782608696	263.891304347826	224.630434782609	187.836956521739	194.913043478261	183.282608695652	205.184782608696	195.782608695652	158.152173913043	155.923913043478	169.021739130435	150.717391304348	181.847826086957	185.826086956522	215.945652173913	198.945652173913	208.586956521739	165.989130434783	219.858695652174	182.815217391304	182.652173913043	176.869565217391	134.239130434783	221.489130434783	143.95652173913	157.282608695652	144.391304347826	222.005672869565	4.93195437777829e-09	down-regulated
ASF1B	512.152173913044	550.913043478261	502.565217391304	563.630434782609	550.228260869565	614	515.391304347826	503.380434782609	477.304347826087	426.434782608696	479.695652173913	575.673913043478	487.663043478261	733.369565217391	744.065217391304	564.413043478261	631.5	550.652173913044	560.923913043478	507.413043478261	581.586956521739	547.315217391304	527.956521739131	493.086956521739	482.304347826087	574.130434782609	456.130434782609	431.673913043478	492.217391304348	441.608695652174	382.021739130435	396.608695652174	440.239130434783	421.717391304348	368.260869565217	508.184782608696	361.989130434783	412.478260869565	335.25	389.913043478261	351.554347826087	270.597826086957	299.04347826087	250.597826086957	235.5	243.130434782609	472.749287521739	5.12707439696204e-09	down-regulated
LMCD1	628.913043478261	571.315217391304	616.565217391304	585.728260869565	554.347826086957	574.130434782609	623.586956521739	564.489130434783	355.760869565217	615.391304347826	685.282608695652	585.065217391304	352.804347826087	464.619565217391	582.717391304348	511.423913043478	450.413043478261	418.195652173913	475	425.565217391304	449.141304347826	366.45652173913	392.782608695652	344.663043478261	392.423913043478	370.826086956522	338.630434782609	327.29347826087	347.913043478261	302.489130434783	298.934782608696	251.5	318.326086956522	388.173913043478	300.097826086957	321.978260869565	348.130434782609	420.652173913044	341.5	285.45652173913	350.239130434783	350.913043478261	341.5	288.652173913044	289.130434782609	339.076086956522	424.09120873913	5.12707439696204e-09	down-regulated
NCOA4	6628.26086956522	6724.08695652174	6495.39130434783	6353.73913043478	6389.52173913044	6543.08695652174	6712.45652173913	6239.84782608696	7361.90217391304	5816.84782608696	6196.13043478261	6707.34782608696	7543.71739130435	6745.97826086957	6202.86956521739	6752.78260869565	7414.63043478261	6702.13043478261	5807.84782608696	6417	7029.23913043478	7005.73913043478	6769.10869565217	6533.1847826087	6428.36956521739	6679.47826086957	6537.0652173913	7029.23913043478	6945.60869565217	6695.21739130435	7461.82608695652	7491.26086956522	7746.26086956522	7145.82608695652	8209.66304347826	8336.70652173913	8685.21739130435	6930.58695652174	8442.17391304348	7819.36956521739	8279.10869565218	7580.15217391304	8402.80434782609	8491.65217391304	7976.76086956522	7976.76086956522	7095.30343008696	5.17339219148466e-09	up-regulated
TNFSF14	0.826086956521739	3.93478260869565	3.34782608695652	2.3695652173913	0.673913043478261	3.91304347826087	1.17391304347826	0	4.43478260869565	0	4.65217391304348	2.95652173913043	6.08695652173913	1.06521739130435	3.80434782608696	0	4	4.67391304347826	3.10869565217391	1.8695652173913	1.02173913043478	5.95652173913044	3.28260869565217	6.80434782608696	7.36956521739131	3.43478260869565	9.8695652173913	10.554347826087	11.304347826087	6.54347826086957	10.3478260869565	21.0978260869565	22.3695652173913	5.07608695652174	13.7391304347826	13.2173913043478	36.5434782608696	12.2173913043478	18.195652173913	21.2173913043478	34.4347826086957	9.93478260869565	26.1304347826087	19.3695652173913	42.1630434782609	14.8913043478261	9.56474443478261	5.235349289712e-09	up-regulated
EXOSC9	1287.32608695652	1420.08695652174	1353.78260869565	1327	1260.51086956522	1362.13043478261	1295.55434782609	1309.47826086957	1323.19565217391	1618.9347826087	1566.15217391304	1212.08695652174	1311.36956521739	1595.05434782609	1563.01086956522	1215.76086956522	1377	1430.05434782609	1239.78260869565	1160.19565217391	1547.86956521739	1236.72826086957	1337.69565217391	1124.82608695652	1209.45652173913	1337.80434782609	1109.01086956522	1200.54347826087	1259.23913043478	1192.45652173913	1077	964.684782608696	1063.69565217391	1126.10869565217	819.663043478261	1059.91304347826	1052.10869565217	1255.73913043478	1046.89130434783	993.315217391304	971.913043478261	970.684782608696	1019.65217391304	859.260869565217	918.021739130435	841	1213.55978619565	5.33829504810548e-09	down-regulated
IPO13	970.891304347826	897.989130434783	813.586956521739	909.076086956522	837.076086956522	873.456521739131	852.239130434783	925.152173913044	1020.39130434783	823.695652173913	736.478260869565	731.065217391304	1035.71739130435	802.54347826087	869.695652173913	728.934782608696	912.29347826087	866.826086956522	887.75	702.5	908.195652173913	999.108695652174	954.010869565218	805.369565217391	944.934782608696	944.065217391304	732.45652173913	957.880434782609	939.673913043478	950.793478260869	1098.1847826087	1199.89130434783	1224.76086956522	1030.36956521739	1328.48913043478	1200.36956521739	1128.32608695652	996.532608695652	1134.88043478261	1228.53260869565	1286	1182.36956521739	1211.73913043478	1196.02173913043	1174.98913043478	1238.80434782609	982.480627652174	5.3820418782352e-09	up-regulated
P4HA2	873.239130434783	822.217391304348	945.652173913044	876.065217391304	1013.52173913043	880.945652173913	1020.54347826087	857.978260869565	1173.5652173913	837.608695652174	726.315217391304	828.836956521739	1034.60869565217	997.945652173913	935.326086956522	903.673913043478	1069.14130434783	976.108695652174	953.239130434783	929.152173913043	1092.84782608696	1026.96739130435	987.347826086956	963.032608695652	1100.38043478261	1064.10869565217	1004.45652173913	1119.85869565217	980.239130434783	925.04347826087	1245.89130434783	1213.34782608696	1357.80434782609	1030.36956521739	1219.30434782609	1303.70652173913	1333.10869565217	1039.95652173913	1489.95652173913	1308.58695652174	1352.25	1202.45652173913	1445.5652173913	1184.45652173913	1380.23913043478	1064.33695652174	1067.20229441304	5.39547235666911e-09	up-regulated
RTKN2	187.326086956522	185.184782608696	185.923913043478	240.413043478261	222.304347826087	204.130434782609	193.489130434783	231.847826086957	145.70652173913	217.260869565217	229.684782608696	277.5	184.565217391304	168.413043478261	208.086956521739	213.478260869565	215.565217391304	140.195652173913	195.717391304348	208.891304347826	193.065217391304	151.54347826087	172.434782608696	227.565217391304	125.782608695652	144.010869565217	217.913043478261	114.282608695652	170.260869565217	217.184782608696	96.5869565217391	113.326086956522	98.6195652173913	217.717391304348	124.282608695652	82.7608695652174	97.1739130434783	176.369565217391	97.2391304347826	68.804347826087	69.4130434782609	119.45652173913	67.0652173913044	63.4673913043478	87.0652173913044	109.152173913043	162.570179978261	5.43083341934659e-09	down-regulated
BLM	1384.9347826087	1612.75	1534.98913043478	2041.53260869565	1626.26086956522	1705.34782608696	1532.5652173913	2045.39130434783	1082.95652173913	1487.23913043478	1617.80434782609	1878.15217391304	1204.60869565217	1630.45652173913	1732.13043478261	1908.25	1550.19565217391	1565.52173913043	1745.69565217391	1823.76086956522	1500.39130434783	1438.03260869565	1426.4347826087	1699.32608695652	1504.78260869565	1402.15217391304	1638	1264.5652173913	1349.9347826087	1523.47826086957	1121.84782608696	1205.84782608696	1154.42391304348	1503.54347826087	953.804347826087	930.760869565217	931.641304347826	1697.52173913043	882.54347826087	888.989130434783	916.315217391304	1219.30434782609	641.891304347826	715.239130434783	717.163043478261	926.5	1388.36910208696	5.54658835778118e-09	down-regulated
CLVS1	26.4130434782609	27.5434782608696	19.304347826087	18.3913043478261	20.4565217391304	25.7391304347826	17.9130434782609	25.4782608695652	8.89130434782609	34.5	26.4782608695652	18.9565217391304	8.56521739130435	15.8913043478261	21.2608695652174	24.2826086956522	14.0652173913043	29.6086956521739	7.71739130434783	12.6739130434783	34.6086956521739	11.9565217391304	16.6086956521739	13.4891304347826	5.58695652173913	5.31521739130435	7.89130434782609	3.43478260869565	4.73913043478261	6.54347826086957	1.06521739130435	1.73913043478261	4.1304347826087	10.9782608695652	1.04347826086957	0	4.1304347826087	10.3260869565217	3.71739130434783	1.02173913043478	3.80434782608696	2	0	0	0	0.826086956521739	12.1540641521739	5.64356562297539e-09	down-regulated
SUPT16H	8302.02173913044	8511.21739130435	8315.08695652174	8622.23913043478	8734.63043478261	8567.95652173913	8567.95652173913	8470.13043478261	8402.80434782609	8491.65217391304	8491.65217391304	8694	8246.06521739131	9170.34782608696	9275.9347826087	8858.71739130435	8774.60869565218	9046.4347826087	9161.80434782609	8655.41304347826	9026.58695652174	8589.05434782609	8380.4347826087	8595.95652173913	8589.05434782609	8368.19565217392	8950.47826086957	8168.67391304348	7648.56521739131	7770.58695652174	8096.17391304348	7746.26086956522	7903.30434782609	8023.95652173913	7674.19565217391	7953.60869565217	7669.54347826087	7892.58695652174	7730.15217391304	8216.04347826087	7913.97826086957	7491.26086956522	7164.36956521739	6822.58695652174	6886.84782608696	6423.36956521739	8240.35868534783	5.66857069768789e-09	down-regulated
[truncated: 257 more rows]
