# Supplementary material for: Role of Non-Coding Regulatory Elements in the Control of GR-Dependent Gene Expression
Source: Int J Mol Sci. 2021 Apr 20;22(8):4258. doi: 10.3390/ijms22084258 (PMC8073421; doi:10.3390/ijms22084258)
Supplement: Supplementary file 1 [file ijms-22-04258-s001.zip › Table_S2.tsv]

gene.name	t00_rep1	t00_rep2	t00_rep3	t00_rep4	t05_rep1	t05_rep2	t05_rep3	t05_rep4	t1_rep1	t1_rep2	t1_rep3	t1_rep4	t2_rep1	t2_rep2	t2_rep3	t2_rep4	t3_rep1	t3_rep2	t3_rep3	t3_rep4	t4_rep1	t4_rep2	t4_rep3	t4_rep4	t5_rep2	t5_rep3	t5_rep4	t6_rep2	t6_rep3	t6_rep4	t7_rep1	t7_rep2	t7_rep3	t7_rep4	t8_rep1	t8_rep2	t8_rep3	t8_rep4	t10_rep1	t10_rep2	t10_rep3	t10_rep4	t12_rep1	t12_rep2	t12_rep3	t12_rep4	mean	fdr
AC092295.1	3.23913043478261	1.02173913043478	1.56521739130435	2.89130434782609	3.10869565217391	3	5.19565217391304	1.02173913043478	1.34782608695652	3.84782608695652	4.65217391304348	3.89130434782609	4.95652173913044	1.06521739130435	6.1304347826087	0.956521739130435	5	3.39130434782609	1.02173913043478	5.89130434782609	1.02173913043478	0	5.54347826086957	2.80434782608696	4.71739130434783	5.31521739130435	3.56521739130435	5.19565217391304	1.41304347826087	3.80434782608696	6.91304347826087	5.21739130434783	2.34782608695652	7.08695652173913	0	3.04347826086957	1.02173913043478	7.67391304347826	4.95652173913044	4.1304347826087	2.39130434782609	6.89130434782609	5.89130434782609	6	4.89130434782609	5.89130434782609	3.71573710217391	0.280674532404896
UTS2B	0	2.02173913043478	2.39130434782609	5.89130434782609	3.10869565217391	1	0	7.80434782608696	0	3.84782608695652	2.23913043478261	3.89130434782609	3.69565217391304	3.35869565217391	7.57608695652174	0	2.02173913043478	4.67391304347826	3.10869565217391	0.956521739130435	1.02173913043478	2	0	1.89130434782609	1.84782608695652	3.43478260869565	2.71739130434783	0	4.73913043478261	2.78260869565217	1.06521739130435	1.73913043478261	0	2.06521739130435	2.15217391304348	2.02173913043478	1.02173913043478	2.80434782608696	4.95652173913044	1.02173913043478	4.95652173913044	0.956521739130435	3.43478260869565	0	2	3.23913043478261	2.42296781304348	0.713116945917931
AC017071.1	1.56521739130435	4.93478260869565	2.39130434782609	9.45652173913044	6.80434782608696	6.84782608695652	1.97826086956522	4.89130434782609	5.93478260869565	8.97826086956522	1.06521739130435	7.91304347826087	3.69565217391304	5.71739130434783	1.15217391304348	6.84782608695652	2.02173913043478	7.97826086956522	7.71739130434783	8.69565217391304	4.17391304347826	3.04347826086957	2.10869565217391	2.80434782608696	0	5.31521739130435	7.89130434782609	1.71739130434783	6.26086956521739	2.78260869565217	2.17391304347826	0.956521739130435	8.17391304347826	9.02173913043478	4.65217391304348	5.02173913043478	8.04347826086957	1.89130434782609	7.52173913043478	6.06521739130435	7.17391304347826	4.93478260869565	4.71739130434783	4.04347826086957	0	7.6304347826087	4.88492431956522	0.957177709838127
AC018816.1	5.93478260869565	2.02173913043478	4.19565217391304	3.84782608695652	10.6195652173913	5.91304347826087	7.80434782608696	7.80434782608696	7.43478260869565	5	3.43478260869565	7.91304347826087	1.15217391304348	0	6.1304347826087	3.89130434782609	2.02173913043478	4.67391304347826	2.02173913043478	1.8695652173913	5.23913043478261	3.04347826086957	3.28260869565217	7.80434782608696	2.78260869565217	5.31521739130435	7.02173913043478	4.23913043478261	4.73913043478261	12.2608695652174	0	5.21739130434783	4.93478260869565	4.1304347826087	3.39130434782609	4.1304347826087	5.04347826086957	3.82608695652174	2.3695652173913	4.1304347826087	7.17391304347826	5.93478260869565	3.43478260869565	3.04347826086957	4.89130434782609	8.43478260869565	4.7717392173913	0.868053321767836
TAS2R4	3.23913043478261	6.93478260869565	15.2826086956522	18.3913043478261	30.1847826086957	8.86956521739131	4.65217391304348	17.7173913043478	2.95652173913043	7.77173913043478	7.80434782608696	11.9565217391304	4.95652173913044	12.3260869565217	3.80434782608696	11.6630434782609	5	7.97826086956522	28.6739130434783	14.8695652173913	4.17391304347826	5.95652173913044	15.445652173913	3.84782608695652	13.0869565217391	12.9347826086957	9.8695652173913	8.89130434782609	3.04347826086957	8.47826086956522	5.89130434782609	9.71739130434783	4.93478260869565	8.02173913043478	6.84782608695652	7.10869565217391	5.04347826086957	7.67391304347826	8.73913043478261	2.06521739130435	1.17391304347826	7.86956521739131	15.9782608695652	11.1304347826087	3.89130434782609	13.3913043478261	9.35302413043478	0.426360589993057
SMIM24	13.0434782608696	3.93478260869565	3.34782608695652	2	3.91304347826087	3.91304347826087	1.17391304347826	2.91304347826087	2.95652173913043	3.84782608695652	5.65217391304348	4.89130434782609	12.195652173913	6.80434782608696	5	1.89130434782609	6	9.1304347826087	7.71739130434783	1.8695652173913	6.39130434782609	3.04347826086957	3.28260869565217	9.73913043478261	5.58695652173913	3.43478260869565	6.06521739130435	5.19565217391304	3.04347826086957	4.76086956521739	6.91304347826087	5.21739130434783	0.826086956521739	9.02173913043478	10.2608695652174	6.06521739130435	2.06521739130435	8.56521739130435	8.73913043478261	3.08695652173913	3.80434782608696	6.89130434782609	8	3.04347826086957	8.78260869565217	3.23913043478261	5.37523619565217	0.666076055669275
AL132639.2	12.0652173913043	14.195652173913	8.95652173913044	6.80434782608696	12.6739130434783	20.695652173913	10.2608695652174	12.3260869565217	7.43478260869565	14.4782608695652	21.9782608695652	8.94565217391304	6.08695652173913	12.3260869565217	5	3.89130434782609	9.17391304347826	10.3695652173913	8.80434782608696	16.8913043478261	22.8478260869565	11.9565217391304	15.445652173913	9.73913043478261	12.1304347826087	11.0434782608696	13.3478260869565	18.6086956521739	19.5	12.2608695652174	16.0869565217391	7.89130434782609	9.91304347826087	12	12.6086956521739	16.0869565217391	15.1304347826087	14.8913043478261	6.1304347826087	10.0217391304348	6	19.8260869565217	12.4782608695652	14.1521739130435	12.8260869565217	10.8695652173913	12.3293954130435	0.811512901305785
AC021483.2	16.695652173913	15.0217391304348	8.95652173913044	16.9347826086957	15.8260869565217	16.8369565217391	11.4130434782609	22.9130434782609	10.2173913043478	8.97826086956522	12.3478260869565	16.9891304347826	13.3913043478261	6.80434782608696	25.2173913043478	27.0760869565217	16.9673913043478	7.97826086956522	14.4565217391304	16.8913043478261	7.52173913043478	7.02173913043478	8.89130434782609	13.4891304347826	10.2608695652174	7.30434782608696	19.4347826086957	4.23913043478261	14.8369565217391	19.1521739130435	12.695652173913	13	8.17391304347826	19.7173913043478	10.2608695652174	15.1304347826087	11.1847826086957	19.6304347826087	7.52173913043478	11.8913043478261	9.76086956521739	19.8260869565217	5.89130434782609	13.1739130434783	9.82608695652174	16.7173913043478	13.4449425	0.470841604168142
SHBG	9.34782608695652	11.0652173913043	0.804347826086957	5.19565217391304	2.19565217391304	4.93478260869565	4.65217391304348	2.02173913043478	2.95652173913043	6.43478260869565	6.80434782608696	2.95652173913043	1.15217391304348	7.86956521739131	7.57608695652174	6.84782608695652	4	5.89130434782609	1.02173913043478	2.80434782608696	2.06521739130435	1.02173913043478	3.28260869565217	2.80434782608696	1.84782608695652	11.0434782608696	5.21739130434783	2.56521739130435	0	1.89130434782609	6.91304347826087	5.21739130434783	7.39130434782609	3.10869565217391	9.08695652173913	4.1304347826087	6.06521739130435	4.80434782608696	3.71739130434783	9.01086956521739	6	2	3.43478260869565	4.04347826086957	7.80434782608696	4.95652173913044	4.6947070826087	0.873110250020673
UGT2B7	9.34782608695652	18.6086956521739	17.3804347826087	14.8913043478261	17.6739130434783	9.8695652173913	15.2282608695652	16.8152173913044	23.9782608695652	11.7173913043478	24.2608695652174	19.9130434782609	23.0652173913043	23.9565217391304	25.2173913043478	28.7826086956522	25.054347826087	23.5978260869565	16.8369565217391	24.0869565217391	27.2065217391304	14.8913043478261	24.2065217391304	29.8913043478261	22.6739130434783	25.9130434782609	14.195652173913	21.3478260869565	14.8369565217391	25.8695652173913	14.8913043478261	12.1304347826087	14.2065217391304	23.6521739130435	27.5217391304348	13.2173913043478	29.0217391304348	19.6304347826087	20.7173913043478	26.0108695652174	14.4021739130435	16.804347826087	22.6521739130435	23.304347826087	24.0652173913044	18.2826086956522	20.2570882826087	0.606744119727504
AC134043.1	13.0434782608696	19.6304347826087	13.5978260869565	16.0869565217391	24.4347826086957	27.8586956521739	17.2173913043478	16.8152173913044	28.2173913043478	24.8695652173913	8.93478260869565	18.9565217391304	30.6739130434783	21.5652173913043	5	11.6630434782609	21.9565217391304	33.9130434782609	9.93478260869565	10.5652173913043	24.0652173913044	20.1086956521739	16.6086956521739	24.1304347826087	21.7391304347826	27.695652173913	12.4782608695652	26.2608695652174	22.6304347826087	17.3913043478261	25.8695652173913	8.86956521739131	19.8260869565217	24.5434782608696	27.5217391304348	18.1521739130435	17.054347826087	16.8695652173913	19.4347826086957	11	15.5434782608696	15.9130434782609	9.08695652173913	14.1521739130435	11.7173913043478	30.5869565217391	19.0040171304348	0.79817505505541
LY6G5C	21.0217391304348	24.4347826086957	6.97826086956522	11.304347826087	11.7173913043478	14.8695652173913	10.2608695652174	16.8152173913044	26.7934782608696	7.77173913043478	18.6630434782609	17.9782608695652	7.32608695652174	18	7.57608695652174	13.6086956521739	11.2608695652174	15	6.54347826086957	14.8695652173913	13.0434782608696	11.9565217391304	12.0652173913043	13.4891304347826	10.2608695652174	16.6521739130435	19.4347826086957	9.69565217391304	14.8369565217391	16.2608695652174	13.8695652173913	14.8478260869565	15.0217391304348	9.97826086956522	14.8913043478261	17.0869565217391	16.0869565217391	9.45652173913044	19.4347826086957	12.9347826086957	7.17391304347826	10.9130434782609	18.195652173913	7.98913043478261	18.9565217391304	14.8913043478261	13.961247826087	0.872319697382226
LINC01619	4.1304347826087	7.91304347826087	13.5978260869565	6.80434782608696	3.10869565217391	6.84782608695652	5.19565217391304	8.78260869565217	7.43478260869565	11.7173913043478	13.4782608695652	16.0652173913044	2.3695652173913	2.17391304347826	17.6739130434783	11.6630434782609	7.04347826086957	9.1304347826087	6.54347826086957	11.5434782608696	3.19565217391304	8.97826086956522	8.89130434782609	10.6739130434783	7.36956521739131	3.43478260869565	4.43478260869565	5.19565217391304	7.95652173913044	11.304347826087	3.39130434782609	1.73913043478261	3.23913043478261	3.10869565217391	1.04347826086957	2.02173913043478	6.06521739130435	4.80434782608696	7.52173913043478	3.08695652173913	7.17391304347826	5.93478260869565	4.71739130434783	7	6.84782608695652	5.89130434782609	6.91824191304348	0.280674532404896
ROPN1L	9.34782608695652	8.97826086956522	6	10.8913043478261	18.5434782608696	6.84782608695652	23.2173913043478	10.5652173913043	8.89130434782609	14.4782608695652	11.2934782608696	6.91304347826087	17.0652173913043	29.7173913043478	15.0652173913043	7.80434782608696	8.10869565217391	19.6521739130435	9.93478260869565	4.82608695652174	28.0869565217391	13.9782608695652	9.91304347826087	11.6739130434783	11.2826086956522	5.31521739130435	9.8695652173913	12.3260869565217	7.95652173913044	4.76086956521739	9.10869565217391	9.71739130434783	9.91304347826087	17.7391304347826	13.7391304347826	18.1521739130435	20.1521739130435	13.0434782608696	18.195652173913	12.9347826086957	7.17391304347826	9.93478260869565	20.5869565217391	22.3478260869565	7.80434782608696	13.3913043478261	12.7660679347826	0.687887951663988
AC040160.1	10.2391304347826	6.93478260869565	9.97826086956522	16.695652173913	11.7173913043478	13.9130434782609	12.2173913043478	18.5	7.43478260869565	20.9782608695652	10.0217391304348	14.0652173913043	9.76086956521739	8.97826086956522	8.93478260869565	14.695652173913	7.04347826086957	11.4782608695652	6.54347826086957	12.6739130434783	5.23913043478261	9.97826086956522	9.91304347826087	11.6739130434783	14.0217391304348	5.31521739130435	13.3478260869565	5.19565217391304	9.68478260869565	14.2391304347826	12.695652173913	7.89130434782609	9.91304347826087	13.0869565217391	16	6.06521739130435	16.0869565217391	16.8695652173913	9.91304347826087	10.0217391304348	15.5434782608696	18.9347826086957	6.91304347826087	11.1304347826087	16.804347826087	10.0217391304348	11.5066161521739	0.893841289684626
GAPDHP60	7.67391304347826	4.93478260869565	16.2173913043478	4.82608695652174	3.91304347826087	3	10.9130434782609	0	19.4347826086957	10.2826086956522	3.43478260869565	11.9565217391304	7.32608695652174	7.86956521739131	2.39130434782609	1.89130434782609	8.10869565217391	11.4782608695652	4.17391304347826	12.6739130434783	4.17391304347826	9.97826086956522	5.54347826086957	12.5869565217391	6.54347826086957	5.31521739130435	9.8695652173913	8.89130434782609	7.95652173913044	12.2608695652174	9.10869565217391	8.86956521739131	5.89130434782609	9.02173913043478	9.08695652173913	8.07608695652174	0	3.82608695652174	7.52173913043478	3.08695652173913	9.76086956521739	4.93478260869565	10.2282608695652	7.98913043478261	5.91304347826087	1.60869565217391	7.40311889130435	0.719680035254308
AC016745.2	21.0217391304348	13.1739130434783	24.304347826087	25.2934782608696	29.3804347826087	30.0217391304348	12.2173913043478	22.9130434782609	4.43478260869565	19.6304347826087	12.3478260869565	11.0434782608696	3.69565217391304	14.6739130434783	10.1521739130435	8.80434782608696	10.1739130434783	7.97826086956522	14.4565217391304	10.5652173913043	5.23913043478261	14.8913043478261	12.0652173913043	13.4891304347826	11.2826086956522	9.08695652173913	11.6739130434783	8.89130434782609	13.0434782608696	5.60869565217391	11.4565217391304	10.5434782608696	9.91304347826087	12	14.8913043478261	15.1304347826087	8.04347826086957	23.1086956521739	15.9130434782609	15.9565217391304	10.9130434782609	16.804347826087	15.9782608695652	12.1739130434783	6.84782608695652	14.8913043478261	13.6112940869565	0.393260146504677
DNAH11	4.1304347826087	4.93478260869565	12.7826086956522	7.15217391304348	6.80434782608696	5.91304347826087	7.80434782608696	8.78260869565217	25.2826086956522	5	7.80434782608696	11.9565217391304	15.9347826086957	7.86956521739131	12.6739130434783	7.80434782608696	17.9782608695652	7.97826086956522	7.71739130434783	9.56521739130435	13.0434782608696	3.95652173913043	16.6086956521739	10.6739130434783	13.0869565217391	12.9347826086957	11.6739130434783	8.89130434782609	9.68478260869565	6.54347826086957	5.89130434782609	9.71739130434783	14.2065217391304	15.9673913043478	16	7.10869565217391	22.3478260869565	8.56521739130435	9.91304347826087	8.04347826086957	10.9130434782609	8.93478260869565	13.5217391304348	7	13.8695652173913	13.3913043478261	10.6164932391304	0.548412548653286
AP003469.4	55.9782608695652	35.2608695652174	58.1956521739131	75.8260869565217	44.554347826087	68.9130434782609	43.5434782608696	78.9891304347826	40.0652173913044	29.3913043478261	39.2173913043478	55.3695652173913	23.0652173913043	35.2608695652174	33.5760869565217	42.9130434782609	36.2173913043478	33.9130434782609	57.1521739130435	50.5434782608696	28.0869565217391	27.2608695652174	35.0869565217391	41.3478260869565	24.8369565217391	42.5217391304348	37.7608695652174	30.804347826087	46.1739130434783	45.5760869565217	47.9130434782609	43.0652173913044	27.3804347826087	53.6304347826087	40.8695652173913	25.3913043478261	31.8369565217391	56.1413043478261	36.5434782608696	43.9239130434783	27.8695652173913	61.1847826086957	29.4782608695652	28.7391304347826	36.9456521739131	48.8695652173913	42.112712826087	0.292122882576362
AP000560.1	5	12.1304347826087	25.2391304347826	21.1086956521739	19.5869565217391	14.8695652173913	3.89130434782609	30.2934782608696	5.93478260869565	8.97826086956522	8.93478260869565	8.94565217391304	12.195652173913	8.97826086956522	21.2608695652174	16.6086956521739	6	7.97826086956522	19.2608695652174	18.9347826086957	4.17391304347826	5.95652173913044	9.91304347826087	12.5869565217391	11.2826086956522	12.9347826086957	22.0652173913044	5.19565217391304	3.04347826086957	20.1086956521739	4.65217391304348	12.1304347826087	7.39130434782609	18.6739130434783	18.3913043478261	8.07608695652174	4.1304347826087	19.6304347826087	6.1304347826087	9.01086956521739	10.9130434782609	42.6304347826087	9.08695652173913	6	2.93478260869565	20.5652173913043	12.6899810434783	0.825998464308828
HEY1	11.1739130434783	15.9782608695652	16.2173913043478	22.6413043478261	27.5	22.4565217391304	19.1521739130435	31.1739130434783	47.7826086956522	36.0108695652174	30.0217391304348	29.8913043478261	38.8478260869565	55.9347826086957	41.2608695652174	54.2826086956522	69.7608695652174	58.304347826087	40.1195652173913	47.7391304347826	70.7608695652174	50.5869565217391	57.9239130434783	51.7173913043478	44.7608695652174	35.3260869565217	45.7173913043478	21.3478260869565	41.195652173913	42.4891304347826	40.1086956521739	26.6304347826087	38.1739130434783	19.7173913043478	17.1521739130435	54.5652173913044	42.5	33.5869565217391	41.3695652173913	34.3260869565217	17.7826086956522	40.0978260869565	29.4782608695652	15.1304347826087	24.0652173913044	34.0869565217391	36.670605	0.864377096441319
ZNF628	46.7173913043478	50.6739130434783	49.8478260869565	29.8695652173913	41.4347826086957	46.5652173913044	52.054347826087	26.3478260869565	35.554347826087	46.6304347826087	38.2391304347826	26.8804347826087	47.1739130434783	39.9782608695652	33.5760869565217	32.9130434782609	31.6521739130435	45.6304347826087	35.6304347826087	30.75	42.2826086956522	37.1304347826087	24.2065217391304	36.2173913043478	36.5652173913044	42.5217391304348	37.7608695652174	40.4782608695652	34.3804347826087	30.8695652173913	42.4021739130435	39.1956521739131	36.7391304347826	34.5978260869565	63.4347826086957	45.8913043478261	25.2391304347826	31.7608695652174	35.0869565217391	29.8695652173913	43.1304347826087	25.2391304347826	33.5652173913044	25.1521739130435	32.0652173913044	19.8913043478261	37.2563793478261	0.280674532404896
GKN1	9.34782608695652	7.91304347826087	8.95652173913044	13.5217391304348	7.80434782608696	9.8695652173913	13.9782608695652	13.1847826086957	13.2608695652174	14.4782608695652	30.0217391304348	15.0652173913043	27.054347826087	3.35869565217391	8.93478260869565	9.8695652173913	8.10869565217391	2.17391304347826	7.71739130434783	11.5434782608696	17.5652173913043	11.0869565217391	9.91304347826087	5.89130434782609	8.28260869565217	5.31521739130435	13.3478260869565	10.554347826087	16.2934782608696	11.304347826087	9.10869565217391	9.71739130434783	15.9782608695652	15.9673913043478	10.2608695652174	7.10869565217391	7.04347826086957	23.1086956521739	6.1304347826087	0	4.95652173913044	10.9130434782609	5.89130434782609	5	3.89130434782609	12.5652173913043	10.7251895	0.293202524988056
RGL3	13.9565217391304	25.4347826086957	31.1521739130435	15.2391304347826	14.6739130434783	22.4565217391304	25.0869565217391	13.1847826086957	14.8478260869565	22.1521739130435	15.6521739130435	7.91304347826087	24.304347826087	18	6.1304347826087	12.5978260869565	6	13.9565217391304	21.5	7.77173913043478	17.5652173913043	16.9782608695652	12.0652173913043	11.6739130434783	24.8369565217391	3.43478260869565	12.4782608695652	10.554347826087	13.0434782608696	15.2173913043478	27.1630434782609	24.5760869565217	19.8260869565217	14.0869565217391	24.1304347826087	28.4239130434783	26.2608695652174	12.2173913043478	21.8804347826087	31.0869565217391	21.1739130434783	13.9130434782609	32.5760869565217	30.8260869565217	23.0869565217391	15.8913043478261	18.1951793478261	0.280674532404896
AL163051.1	23.8478260869565	20.4565217391304	31.1521739130435	14.0217391304348	10.6195652173913	14.8695652173913	10.9130434782609	6.80434782608696	11.7826086956522	23.4565217391304	18.6630434782609	18.9565217391304	12.195652173913	18	15.0652173913043	27.0760869565217	20.8478260869565	15	18.0434782608696	24.0869565217391	28.0869565217391	24.2608695652174	12.0652173913043	16.2173913043478	21.7391304347826	20.4565217391304	26.0434782608696	26.2608695652174	22.6304347826087	18.3695652173913	14.8913043478261	23.8478260869565	18.3260869565217	24.5434782608696	12.6086956521739	32.8913043478261	21.2608695652174	21.4782608695652	23.1086956521739	12.9347826086957	21.1739130434783	5.93478260869565	8	24.195652173913	25.8695652173913	22.1086956521739	19.2426754565217	0.717122838990659
ITGA7	22.9565217391304	17.7826086956522	20.3913043478261	18.9347826086957	17.6739130434783	13.9130434782609	17.9130434782609	16.8152173913044	19.4347826086957	14.4782608695652	17.6739130434783	9.95652173913044	9.76086956521739	19.1521739130435	23.9782608695652	20.6847826086957	19.8260869565217	23.5978260869565	15.7173913043478	11.5434782608696	16.5108695652174	11.9565217391304	21.0652173913044	20.2173913043478	22.6739130434783	9.08695652173913	20.304347826087	18.6086956521739	14.8369565217391	9.43478260869565	11.4565217391304	13.9347826086957	20.7173913043478	21.7391304347826	22.8478260869565	11.2826086956522	24.2391304347826	13.0434782608696	12.195652173913	10.0217391304348	16.7173913043478	9.93478260869565	18.195652173913	15.1304347826087	15.8260869565217	14.8913043478261	16.7185722826087	0.392000110145488
ARL10	25.5434782608696	21.4782608695652	34.2173913043478	23.0869565217391	24.4347826086957	26.8478260869565	19.1521739130435	20.3478260869565	30.9130434782609	26.2717391304348	24.2608695652174	29.8913043478261	49.5978260869565	21.5652173913043	26.4130434782609	36.9347826086957	39.4673913043478	29.6086956521739	25.0326086956522	49.5652173913044	29.0217391304348	39.0434782608696	48.6847826086957	58.2608695652174	41.2391304347826	22.2826086956522	43.5	40.4782608695652	38	36.9130434782609	30.8695652173913	37.7391304347826	27.3804347826087	32.2608695652174	38.7065217391304	24.3260869565217	34.6086956521739	29.6521739130435	36.5434782608696	29.8695652173913	30.9565217391304	37	25.0217391304348	32.7391304347826	25.8695652173913	32.2608695652174	32.3447545652174	0.609618478734161
LRRC3	27.3478260869565	33.1304347826087	33.1847826086957	32.054347826087	28.3152173913044	37.1086956521739	43.5434782608696	35.4565217391304	38.6739130434783	20.9782608695652	34.1739130434783	36.9347826086957	61.8913043478261	37.0217391304348	42.6304347826087	46.1956521739131	52.304347826087	63.7065217391304	60.5217391304348	39.945652173913	57.6304347826087	25.25	35.0869565217391	53.4782608695652	41.2391304347826	31.6521739130435	38.7173913043478	44.0652173913044	34.3804347826087	31.7173913043478	46.7173913043478	37.7391304347826	43.0652173913044	46.8260869565217	47.804347826087	48.9782608695652	32.8913043478261	42.2391304347826	31.5434782608696	36.1739130434783	46.6413043478261	33.0434782608696	34.9130434782609	21.2826086956522	25.8695652173913	30.5869565217391	39.2315684782609	0.714893838837107
OCLM	8.45652173913044	15.0217391304348	12.7826086956522	15.2391304347826	10.6195652173913	8.86956521739131	15.2282608695652	13.1847826086957	4.43478260869565	13.0652173913043	7.80434782608696	16.0652173913044	14.6739130434783	3.35869565217391	13.9565217391304	11.6630434782609	8.10869565217391	9.1304347826087	22.6739130434783	20.9347826086957	4.17391304347826	16.0217391304348	10.9347826086957	10.6739130434783	20.7065217391304	7.30434782608696	17.804347826087	7	26.1304347826087	21.0217391304348	9.10869565217391	12.1304347826087	9.91304347826087	9.97826086956522	12.6086956521739	8.07608695652174	10.1521739130435	18.5869565217391	18.195652173913	13.9347826086957	9.76086956521739	26.1304347826087	19.3586956521739	6	16.804347826087	22.9347826086957	13.2764646304348	0.35583317303918
AC068338.2	39.8478260869565	36.2282608695652	23.3478260869565	30.7608695652174	30.1847826086957	30.0217391304348	27.695652173913	25.4782608695652	32.3478260869565	42.5326086956522	24.2608695652174	41.2717391304348	33.1521739130435	48.054347826087	38.6847826086957	29.8695652173913	37.3478260869565	48.6521739130435	41.2826086956522	31.75	42.2826086956522	41.9565217391304	36.2173913043478	22.195652173913	34.6304347826087	14.804347826087	31.4239130434783	36.1086956521739	53.1521739130435	44.4673913043478	40.1086956521739	36	29.8804347826087	35.7391304347826	41.9565217391304	37.6956521739131	39.1956521739131	36.4891304347826	35.0869565217391	28.7391304347826	37.6956521739131	43.5869565217391	41.7391304347826	38.9347826086957	42.1630434782609	36.7717391304348	35.9085536956522	0.309344296585431
AL133338.1	19.3695652173913	15.0217391304348	6	14.5	11.7173913043478	13.9130434782609	17.9130434782609	21.1739130434783	10.2173913043478	13.0652173913043	18.6630434782609	13	10.9347826086957	15.8913043478261	17.6739130434783	23.3913043478261	17.9782608695652	7.97826086956522	6.54347826086957	14.8695652173913	10.8260869565217	19.0434782608696	9.91304347826087	19.195652173913	15.9565217391304	20.4565217391304	17.804347826087	9.69565217391304	14.8369565217391	14.2391304347826	16.0869565217391	9.71739130434783	12.5	9.97826086956522	13.7391304347826	8.07608695652174	10.1521739130435	14.8913043478261	21.8804347826087	7.10869565217391	14.4021739130435	10.9130434782609	11.3478260869565	7.98913043478261	18.9565217391304	11.7608695652174	13.9409256304348	0.479577752731429
C5orf56	9.34782608695652	6.93478260869565	18.3913043478261	12.6739130434783	7.80434782608696	15.9347826086957	13.3913043478261	12.3260869565217	7.43478260869565	7.77173913043478	16.6739130434783	11.0434782608696	18.3913043478261	8.97826086956522	11.3478260869565	8.80434782608696	13.0652173913043	9.1304347826087	15.7173913043478	9.56521739130435	11.8913043478261	13	13.1739130434783	12.5869565217391	5.58695652173913	3.43478260869565	13.3478260869565	11.4130434782609	6.26086956521739	7.52173913043478	7.97826086956522	7.89130434782609	16.7826086956522	6.06521739130435	7.97826086956522	12.304347826087	7.04347826086957	6.6304347826087	6.1304347826087	11	15.5434782608696	14.8804347826087	15.9782608695652	17.4130434782609	7.80434782608696	10.0217391304348	10.965028	0.854761287454209
AC012085.1	34.4239130434783	21.4782608695652	34.2173913043478	12.6739130434783	26.5652173913044	18.695652173913	26.3478260869565	6.80434782608696	19.4347826086957	27.8695652173913	18.6630434782609	15.0652173913043	18.3913043478261	8.97826086956522	11.3478260869565	2.84782608695652	25.054347826087	17.4565217391304	15.7173913043478	11.5434782608696	25.2391304347826	16.9782608695652	23.1739130434783	8.80434782608696	23.7065217391304	22.2826086956522	4.43478260869565	27.9130434782609	16.2934782608696	29.7717391304348	24.5434782608696	21.0978260869565	19.0434782608696	8.02173913043478	10.2608695652174	34.5652173913044	11.1847826086957	16.8695652173913	23.1086956521739	11.8913043478261	14.4021739130435	11.8913043478261	19.3586956521739	25.1521739130435	13.8695652173913	17.4565217391304	18.5845935869565	0.786735003113069
CDK11A	45.8478260869565	33.1304347826087	29.3913043478261	18.9347826086957	30.1847826086957	37.1086956521739	31.8369565217391	30.2934782608696	47.7826086956522	45.5217391304348	42.804347826087	11.9565217391304	31.8913043478261	33.2608695652174	21.2608695652174	14.695652173913	16.0217391304348	44.5434782608696	36.7826086956522	21.9565217391304	37.9782608695652	39.0434782608696	29.9782608695652	26.9347826086957	23.7065217391304	18.5	16	27.9130434782609	31.0326086956522	16.2608695652174	41.2608695652174	32.4347826086957	28.9565217391304	21.7391304347826	39.804347826087	41.0434782608696	39.1956521739131	20.5978260869565	41.3695652173913	24.0434782608696	35.2826086956522	22.5869565217391	40.5434782608696	42.9021739130435	29.9130434782609	19.8913043478261	30.7417295652174	0.961997517770803
RNU6-8	11.1739130434783	12.1304347826087	17.3804347826087	16.9347826086957	15.8260869565217	13.9130434782609	9.72826086956522	22.1086956521739	11.7826086956522	18.2826086956522	17.6739130434783	13	14.6739130434783	15.8913043478261	17.6739130434783	12.5978260869565	19.8260869565217	7.97826086956522	5.32608695652174	21.9565217391304	25.2391304347826	9.97826086956522	23.1739130434783	16.2173913043478	12.1304347826087	16.6521739130435	22.7065217391304	28.7391304347826	21.0217391304348	17.3913043478261	22.1739130434783	14.8478260869565	7.39130434782609	27.8695652173913	20.6521739130435	12.304347826087	17.054347826087	11.2826086956522	16.9782608695652	7.10869565217391	15.5434782608696	17.8913043478261	8	15.1304347826087	13.8695652173913	26.4130434782609	16.1656419565217	0.847562501995947
TPI1P1	72.1521739130435	47.8913043478261	53.3695652173913	13.0760869565217	73.9782608695652	38.1304347826087	55.9347826086957	15.0217391304348	79.4456521739131	55.1847826086957	19.9130434782609	27.75	58.9347826086957	42.2608695652174	39.9565217391304	33.9130434782609	37.3478260869565	50.9347826086957	42.6086956521739	36.6304347826087	51.1956521739131	33.2608695652174	35.0869565217391	28.8478260869565	31.3913043478261	40.6630434782609	29.6739130434783	60.8260869565218	47.9130434782609	29.7717391304348	51.7173913043478	47.8260869565218	43.7934782608696	23.6521739130435	38.7065217391304	52.5652173913044	26.2608695652174	20.5978260869565	45.1630434782609	29.8695652173913	29.8804347826087	17.8913043478261	51.8478260869565	41.8695652173913	39.0434782608696	27.0869565217391	40.6703682608696	0.392915116742518
HSPA8P8	11.1739130434783	7.91304347826087	12.7826086956522	8.97826086956522	11.7173913043478	9.8695652173913	19.8695652173913	6.80434782608696	17.9130434782609	19.6304347826087	5.65217391304348	14.0652173913043	7.32608695652174	11.2608695652174	6.1304347826087	11.6630434782609	18.9347826086957	13.9565217391304	11.0869565217391	9.56521739130435	8.60869565217391	16.0217391304348	4.32608695652174	11.6739130434783	10.2608695652174	9.08695652173913	9.8695652173913	10.554347826087	9.68478260869565	15.2173913043478	19.8913043478261	12.1304347826087	5.89130434782609	10.9782608695652	22.8478260869565	13.2173913043478	12.1739130434783	19.6304347826087	12.195652173913	4.1304347826087	6	7.86956521739131	9.08695652173913	16.2391304347826	12.8260869565217	4.95652173913044	11.5578917608696	0.873110250020673
AL356235.1	13.9565217391304	15.9782608695652	11.8478260869565	23.8913043478261	21.3478260869565	14.8695652173913	19.1521739130435	30.2934782608696	10.2173913043478	23.4565217391304	27.5869565217391	26.8804347826087	13.3913043478261	19.1521739130435	31.3478260869565	22.4782608695652	1.02173913043478	22.2608695652174	32	12.6739130434783	15.2173913043478	23.195652173913	26.3478260869565	15.2391304347826	18.6630434782609	14.804347826087	23.5	15.9565217391304	16.2934782608696	21.0217391304348	7.97826086956522	13.9347826086957	11.695652173913	27.8695652173913	16	18.1521739130435	16.0869565217391	19.6304347826087	20.7173913043478	15.9565217391304	21.1739130434783	19.8260869565217	12.4782608695652	12.1739130434783	13.8695652173913	11.7608695652174	18.3336480434783	0.331954007459871
PCDHB6	19.3695652173913	18.6086956521739	17.3804347826087	22.1521739130435	26.5652173913044	28.8695652173913	25.7173913043478	25.4782608695652	23.9782608695652	26.2717391304348	19.9130434782609	23.8913043478261	12.195652173913	14.6739130434783	27.6521739130435	25.2391304347826	30.695652173913	24.7391304347826	20.4130434782609	24.0869565217391	17.5652173913043	16.9782608695652	22.1739130434783	26.9347826086957	9.23913043478261	14.804347826087	23.5	22.3478260869565	6.26086956521739	27.8152173913044	19.8913043478261	20.1521739130435	23.3152173913044	20.7391304347826	21.7173913043478	30.2717391304348	29.9347826086957	21.4782608695652	29.2717391304348	26.9782608695652	22.3478260869565	26.1304347826087	20.5869565217391	23.304347826087	36.9456521739131	30.5869565217391	22.8078919565217	0.37675490927431
LYRM9	17.4565217391304	21.4782608695652	33.1847826086957	20.7391304347826	16.7391304347826	19.7173913043478	22.054347826087	21.1739130434783	17.9130434782609	30.8260869565217	18.6630434782609	18.9565217391304	10.9347826086957	33.2608695652174	15.0652173913043	14.695652173913	21.9565217391304	32.804347826087	13.2934782608696	16.8913043478261	13.0434782608696	22.2173913043478	17.7391304347826	26.0652173913044	17.804347826087	20.4565217391304	21.0869565217391	20.4130434782609	11.304347826087	25.8695652173913	23.4239130434783	25.695652173913	17.5978260869565	14.0869565217391	19.5869565217391	14.2391304347826	25.2391304347826	23.1086956521739	23.1086956521739	28.7391304347826	23.6304347826087	17.8913043478261	27.2065217391304	27.8586956521739	45.2173913043478	27.9347826086957	21.7036860869565	0.286403247057182
PLAC8	34.4239130434783	32.3260869565217	22.2826086956522	29.6304347826087	25.4565217391304	16.8369565217391	30.3586956521739	29.0434782608696	33.9347826086957	22.1521739130435	32.195652173913	40.2173913043478	23.0652173913043	20.445652173913	37.2173913043478	28.7826086956522	30.695652173913	16.1086956521739	37.9782608695652	21.9565217391304	21.8260869565217	22.2173913043478	29.9782608695652	39.3260869565217	30.4782608695652	38.8804347826087	38.7173913043478	26.2608695652174	41.195652173913	14.2391304347826	18.6304347826087	21.0978260869565	19.0434782608696	32.2608695652174	28.6739130434783	13.2173913043478	26.2608695652174	24.0652173913044	18.195652173913	11.8913043478261	12.0217391304348	30.0869565217391	26.1304347826087	15.1304347826087	31.0326086956522	38.5	26.836247173913	0.349487798213694
CAPN10-DT	24.5760869565217	33.1304347826087	27.3260869565217	23.0869565217391	24.4347826086957	34.9565217391304	28.7717391304348	22.1086956521739	38.6739130434783	24.8695652173913	32.195652173913	19.9130434782609	44.7826086956522	28.6086956521739	19.9130434782609	27.9347826086957	39.4673913043478	37.3695652173913	21.5	39.945652173913	35.8260869565217	43.0652173913044	24.2065217391304	26.9347826086957	30.4782608695652	35.3260869565217	30.5869565217391	34.4347826086957	51.5217391304348	28.7391304347826	33.3369565217391	36	19.0434782608696	29.6086956521739	18.3913043478261	31.195652173913	35.5108695652174	25.8695652173913	31.5434782608696	32.304347826087	34.4347826086957	19.8260869565217	41.7391304347826	30.8260869565217	31.0326086956522	22.1086956521739	30.5968815217391	0.82176392689074
NCKAP5-AS2	19.3695652173913	32.3260869565217	20.3913043478261	23.0869565217391	33.5652173913044	22.4565217391304	19.8695652173913	22.9130434782609	25.2826086956522	24.8695652173913	21.0108695652174	16.9891304347826	14.6739130434783	18	30.0760869565217	16.6086956521739	39.4673913043478	17.4565217391304	11.0869565217391	15.9565217391304	21.8260869565217	13.9782608695652	19.9891304347826	21.2608695652174	16.8152173913044	24.1739130434783	14.195652173913	27.9130434782609	24.3260869565217	27.8152173913044	24.5434782608696	35.0869565217391	23.3152173913044	22.6521739130435	27.5217391304348	26.4130434782609	20.1521739130435	23.1086956521739	42.6413043478261	26.9782608695652	29.8804347826087	33.0434782608696	23.8478260869565	26.9782608695652	24.0652173913044	29.6739130434783	23.8620041304348	0.280674532404896
AL359263.1	35.2826086956522	25.4347826086957	35.1956521739131	16.695652173913	29.3804347826087	24.5434782608696	27.0652173913044	23.8478260869565	20.9782608695652	27.8695652173913	18.6630434782609	16.0652173913044	24.304347826087	21.5652173913043	10.1521739130435	21.5217391304348	22.9565217391304	27.4782608695652	22.6739130434783	23	28.0869565217391	25.25	14.4565217391304	16.2173913043478	19.6521739130435	20.4565217391304	9.8695652173913	20.4130434782609	24.3260869565217	31.7173913043478	22.1739130434783	35.0869565217391	29.8804347826087	14.9782608695652	17.1521739130435	29.4782608695652	18.0978260869565	17.8152173913043	21.8804347826087	19.2173913043478	21.1739130434783	19.8260869565217	17	34.8369565217391	16.804347826087	19.1086956521739	22.6006614130435	0.595947867402743
ALOX12-AS1	53.5869565217391	46.7826086956522	57.0652173913044	61.9239130434783	58.1630434782609	43.2173913043478	48.6521739130435	53.3695652173913	47.7826086956522	62.9130434782609	70.4021739130435	56.3478260869565	53.304347826087	62.6739130434783	41.2608695652174	57.2391304347826	43.75	58.304347826087	53.5869565217391	54.5652173913044	34.6086956521739	43.0652173913044	47.6630434782609	59.1521739130435	72.0326086956522	46.3913043478261	75.8260869565217	69.0217391304348	77.8478260869565	62.6086956521739	42.4021739130435	53.7826086956522	57.1739130434783	37.9347826086957	29.75	42.1739130434783	49.8804347826087	61.6739130434783	31.5434782608696	63.9130434782609	37.6956521739131	52.554347826087	54.1304347826087	68.8478260869565	56.0217391304348	41.5	53.3497163043478	0.708788205356135
MAP6D1	43.2282608695652	44.8478260869565	51.0217391304348	63.5	52.6086956521739	40.4130434782609	42.804347826087	63.1304347826087	72.5652173913043	46.6304347826087	47.3478260869565	60.8478260869565	76.7717391304348	66.8586956521739	37.2173913043478	45.1413043478261	72.7826086956522	41.0869565217391	57.1521739130435	69.7717391304348	95.554347826087	56.2717391304348	59.1521739130435	70.7282608695652	62.1413043478261	75.1956521739131	70.6521739130435	61.8478260869565	59.9130434782609	73.8913043478261	47.9130434782609	50.5869565217391	38.1739130434783	86.4565217391304	68.6521739130435	29.4782608695652	53.0217391304348	74.1956521739131	60.9782608695652	36.1739130434783	50.8913043478261	70.5869565217391	36.1086956521739	27.8586956521739	31.0326086956522	55.3260869565218	56.4893665217391	0.606744119727504
DEPTOR	59.5217391304348	74.7608695652174	49.8478260869565	34.2391304347826	40.6630434782609	49.9021739130435	59.5652173913044	42.804347826087	47.7826086956522	53.9891304347826	73.9565217391304	52.4347826086957	51.9130434782609	54.7391304347826	65.0869565217391	50.6304347826087	36.2173913043478	50.9347826086957	47.1304347826087	57.3152173913044	46.4456521739131	70.3695652173913	59.1521739130435	63.9347826086957	55.6739130434783	60.25	57.9782608695652	53.1956521739131	58.1956521739131	53.4782608695652	65.9347826086957	66.0108695652174	53.5326086956522	40.1195652173913	65.2826086956522	57.8913043478261	72.9782608695652	45.6956521739131	47.8369565217391	55.8695652173913	43.1304347826087	50.5	60	83.5217391304348	61.3260869565217	59.304347826087	55.674857826087	0.392000110145488
TMC6	93.1847826086957	114.228260869565	95.3478260869565	89.8586956521739	71.9782608695652	83.5217391304348	94.3478260869565	88.6956521739131	107.880434782609	73.2826086956522	79.0217391304348	77.9239130434783	87.2173913043478	91.6521739130435	67.554347826087	73.7826086956522	86.8369565217391	77.0652173913044	83.8586956521739	85.5	95.554347826087	90.0217391304348	94.304347826087	75.5652173913044	86.2608695652174	75.1956521739131	77.3913043478261	100.04347826087	72.5	76.3369565217391	102.130434782609	119.728260869565	84.3478260869565	101.95652173913	97.7391304347826	114.586956521739	95.4021739130435	68.6521739130435	79.6521739130435	102.217391304348	84.4347826086957	95.3478260869565	118.413043478261	84.5217391304348	81.554347826087	81.7065217391304	88.6587908695652	0.585292872973451
POC1B-AS1	25.5434782608696	23.445652173913	29.3913043478261	19.6739130434783	34.4347826086957	34.9565217391304	30.9891304347826	18.5	28.2173913043478	56.5	51.7826086956522	56.3478260869565	37.6739130434783	52.4565217391304	75.9347826086957	67.8478260869565	32.4347826086957	64.7608695652174	66.0652173913044	70.9130434782609	39.0652173913044	65.3478260869565	66.2173913043478	76.804347826087	69.7173913043478	69	71.6086956521739	64.8369565217391	64.6195652173913	67.9347826086957	49.2826086956522	52.8260869565218	34.3260869565217	34.5978260869565	47.804347826087	42.1739130434783	41.4130434782609	38.2826086956522	40.0978260869565	46.6521739130435	45.6086956521739	25.2391304347826	39.4456521739131	44.75	24.9347826086957	46.4239130434783	47.5408791304348	0.961997517770803
LNCOC1	13.0434782608696	33.1304347826087	33.1847826086957	18.9347826086957	28.3152173913044	28.8695652173913	21.2608695652174	23.8478260869565	11.7826086956522	30.8260869565217	32.195652173913	28.7826086956522	18.3913043478261	35.2608695652174	43.9456521739131	31.8695652173913	32.4347826086957	35.0869565217391	39.0434782608696	42.1521739130435	20.8369565217391	30.2608695652174	29	36.2173913043478	35.5217391304348	40.6630434782609	61.4782608695652	35.2608695652174	36.1521739130435	45.5760869565217	12.695652173913	37.7391304347826	22.3695652173913	29.6086956521739	14.8913043478261	32.8913043478261	29.0217391304348	23.1086956521739	26.7826086956522	35.2173913043478	24.8260869565217	25.2391304347826	34.9130434782609	44.75	41.0869565217391	24.5434782608696	30.717627826087	0.611963499873645
TRIM36	25.5434782608696	31.2934782608696	33.1847826086957	45.8260869565218	32.4782608695652	36.1086956521739	25.0869565217391	52.3913043478261	63.5	10.2826086956522	33.1086956521739	37.9347826086957	49.5978260869565	34.3260869565217	46.4782608695652	34.9347826086957	67.2282608695652	45.6304347826087	67.5217391304348	79.6086956521739	69.6304347826087	45.1630434782609	59.1521739130435	55.3695652173913	50.0869565217391	52.3695652173913	48.6956521739131	57.3586956521739	61.3152173913043	62.6086956521739	49.2826086956522	30.6739130434783	43.7934782608696	48.6630434782609	46.7173913043478	33.5869565217391	46.695652173913	34.7173913043478	51.6304347826087	24.9782608695652	35.2826086956522	45.6195652173913	29.4782608695652	28.7391304347826	48.5652173913044	46.4239130434783	44.7535447826087	0.969605464669384
ANKDD1A	42.304347826087	45.8913043478261	41.0326086956522	56.0869565217391	31.2065217391304	56.3152173913043	40.1521739130435	54.2826086956522	51.8478260869565	52.7391304347826	47.3478260869565	48.0326086956522	53.304347826087	42.2608695652174	50.3478260869565	53.25	34.2173913043478	44.5434782608696	44.7608695652174	62.1956521739131	50.2065217391304	54.3913043478261	53.8478260869565	43.75	43.0652173913044	27.695652173913	90.7826086956522	40.4782608695652	49.7934782608696	55.6413043478261	51.7173913043478	52.8260869565218	55.3695652173913	52.5652173913044	32	38.7608695652174	59.4565217391304	39.1304347826087	38.8478260869565	49.4347826086957	42.1304347826087	49.6304347826087	44.8478260869565	62.3586956521739	48.5652173913044	47.5217391304348	48.4116260869565	0.961997517770803
SHISA4	101.108695652174	84.9347826086957	68.9130434782609	63.5	69.8260869565217	60.8913043478261	82.2391304347826	59.8260869565218	65.9565217391304	68.554347826087	59.2608695652174	57.2608695652174	57.8913043478261	83.8260869565217	57.4565217391304	46.1956521739131	54.6086956521739	80.304347826087	61.9565217391304	39.945652173913	53.3695652173913	67.7826086956522	62.7608695652174	51.7173913043478	53.3695652173913	63.7826086956522	55.1195652173913	101.130434782609	53.1521739130435	44.4673913043478	83.3152173913044	66.0108695652174	62.75	53.6304347826087	97.7391304347826	92.3695652173913	56.5760869565217	34.7173913043478	68.2282608695652	58.1195652173913	69.4130434782609	43.5869565217391	55.304347826087	66.6739130434783	82.4565217391304	56.7065217391304	64.7544891304348	0.809127401423313
TMEM30B	29.3913043478261	23.445652173913	14.5	29.6304347826087	17.6739130434783	25.7391304347826	24.4347826086957	28.1847826086957	19.4347826086957	24.8695652173913	23.1086956521739	27.75	20.7391304347826	16.9021739130435	41.2608695652174	27.9347826086957	40.2934782608696	29.6086956521739	27.3913043478261	37.6413043478261	24.0652173913044	20.1086956521739	31.8804347826087	40.2173913043478	21.7391304347826	33.3913043478261	22.0652173913044	16.804347826087	21.0217391304348	24.9021739130435	13.8695652173913	28.6086956521739	31.8586956521739	41.2608695652174	19.5869565217391	17.0869565217391	29.9347826086957	28.6739130434783	31.5434782608696	13.9347826086957	27.8695652173913	27.9347826086957	17	38.9347826086957	27.9130434782609	23.7826086956522	26.2157369565217	0.961997517770803
AC091271.1	36.1521739130435	37.2608695652174	45.6086956521739	51.0652173913044	39.7391304347826	54.4347826086957	40.6739130434783	39.1304347826087	38.6739130434783	37.4347826086957	44.945652173913	31.0217391304348	25.7173913043478	62.6739130434783	34.7391304347826	35.9782608695652	37.3478260869565	33.9130434782609	43.8260869565217	43.9347826086957	32.3260869565217	33.2608695652174	34.0217391304348	29.8913043478261	37.6304347826087	40.6630434782609	38.7173913043478	35.2608695652174	31.0326086956522	43.5434782608696	33.3369565217391	36.7826086956522	30.9347826086957	41.2608695652174	24.1304347826087	43.1304347826087	44.5652173913044	38.2826086956522	32.7391304347826	33.3369565217391	38.8804347826087	41.9782608695652	19.3586956521739	38.9347826086957	52.6739130434783	28.8478260869565	38.0389880434783	0.342361606781767
AC080013.1	75.6847826086957	43.054347826087	46.4021739130435	52.7608695652174	77.9347826086957	63.1304347826087	46.7391304347826	65.6847826086957	22.5217391304348	51.6304347826087	48.2173913043478	52.4347826086957	30.6739130434783	29.7173913043478	37.2173913043478	42.9130434782609	36.2173913043478	36.2282608695652	30.8913043478261	58.3586956521739	36.9130434782609	40.1086956521739	32.8913043478261	48.1304347826087	40.1086956521739	35.3260869565217	53.3695652173913	39.554347826087	32.7391304347826	40.8260869565217	59.0434782608696	48.6739130434783	47.7173913043478	49.6739130434783	44.1739130434783	38.7608695652174	41.4130434782609	50.3478260869565	30.4347826086957	59.2608695652174	42.1304347826087	52.554347826087	43.9347826086957	56.6304347826087	68.5760869565217	75.5217391304348	46.8962656521739	0.811244390018805
LPAR6	129.04347826087	114.228260869565	92.4347826086957	88.6956521739131	76.9347826086957	143.282608695652	110.04347826087	95.8586956521739	43.054347826087	124.880434782609	102.54347826087	94.5	64.9565217391304	83.8260869565217	56.5	83.5217391304348	44.7717391304348	77.0652173913044	33.1521739130435	74.9782608695652	55.5	70.3695652173913	83.8913043478261	59.1521739130435	65.054347826087	67.1195652173913	71.6086956521739	72.4347826086957	74.5326086956522	82.6086956521739	72.9565217391304	75.2826086956522	76.8913043478261	72.0869565217391	59.2608695652174	65.1413043478261	92.4130434782609	98.3478260869565	104.45652173913	74.8695652173913	87.8913043478261	71.3586956521739	77.304347826087	128.184782608696	88.0652173913044	78.7391304347826	81.7346423913044	0.708269709200534
GPATCH3	86.304347826087	89.2391304347826	80.5434782608696	73.0434782608696	78.804347826087	73.3586956521739	97.2065217391305	67.2065217391304	98.8260869565217	127.20652173913	98.2608695652174	78.7391304347826	78.9891304347826	86.2391304347826	83.8586956521739	90.6956521739131	100.239130434783	65.9673913043478	114.934782608696	66.6086956521739	93.304347826087	98.2391304347826	82.6086956521739	86.054347826087	104.260869565217	78.7826086956522	90.7826086956522	93.9239130434783	101.130434782609	83.6956521739131	102.130434782609	84.7826086956522	101.45652173913	61.8695652173913	74.3913043478261	94.8152173913043	72.9782608695652	65.7391304347826	94.695652173913	77.9347826086957	93.6086956521739	90.2173913043478	86.8369565217391	96.2826086956522	100.119565217391	80.5217391304348	87.5529293478261	0.893841289684626
LSMEM1	32.804347826087	30.2173913043478	43.8260869565217	26.2608695652174	42.4782608695652	38.1304347826087	25.0869565217391	39.1304347826087	46.3478260869565	64.3586956521739	60.3586956521739	37.9347826086957	46	43.554347826087	35.9565217391304	41.8913043478261	30.695652173913	26.1304347826087	53.5869565217391	45.0434782608696	31.0869565217391	46.4130434782609	39.4347826086957	33.7173913043478	53.3695652173913	42.5217391304348	40.6304347826087	39.554347826087	51.5217391304348	46.4130434782609	35.4456521739131	32.4347826086957	20.7173913043478	34.5978260869565	45.6304347826087	48.9782608695652	30.8913043478261	36.4891304347826	23.1086956521739	28.7391304347826	29.8804347826087	17.8913043478261	23.8478260869565	36.1086956521739	29.9130434782609	33.1847826086957	37.8764173913044	0.280674532404896
GABRA3	22.9565217391304	27.5434782608696	23.3478260869565	22.6413043478261	27.5	23.4673913043478	13.9782608695652	27.2391304347826	17.9130434782609	23.4565217391304	26.4782608695652	28.7826086956522	20.7391304347826	20.445652173913	41.2608695652174	16.6086956521739	19.8260869565217	26.1304347826087	21.5	20.9347826086957	13.0434782608696	26.2608695652174	24.2065217391304	20.2173913043478	16.8152173913044	29.6739130434783	16.9130434782609	17.804347826087	19.5	22.8478260869565	23.4239130434783	27.6521739130435	23.3152173913044	28.7608695652174	25.2826086956522	21.304347826087	17.054347826087	24.0652173913044	19.4347826086957	18.1304347826087	18.8260869565217	34.1086956521739	23.8478260869565	28.7391304347826	18.9565217391304	19.1086956521739	22.8705104347826	0.832910178327306
GCNA	30.2717391304348	27.5434782608696	18.3913043478261	32.054347826087	31.2065217391304	30.945652173913	19.8695652173913	27.2391304347826	40.0652173913044	33.2608695652174	38.2391304347826	32.9021739130435	51.9130434782609	22.6847826086957	26.4130434782609	25.2391304347826	25.8695652173913	27.4782608695652	27.3913043478261	33.5869565217391	34.6086956521739	41.9565217391304	27.804347826087	42.6086956521739	36.5652173913044	27.695652173913	23.5	31.6521739130435	17.9782608695652	36.9130434782609	42.4021739130435	32.4347826086957	28.1195652173913	33.4021739130435	28.6739130434783	39.8695652173913	39.1956521739131	24.9565217391304	25.5434782608696	32.304347826087	17.7826086956522	33.0434782608696	30.4347826086957	36.1086956521739	28.8695652173913	37.6956521739131	31.1887995652174	0.836403950946765
PDIA3P1	54.8478260869565	73.7391304347826	67.0217391304348	63.5	66.1956521739131	91.7391304347826	57.0217391304348	58.1521739130435	92.9782608695652	85.9673913043478	68.1847826086957	65.0869565217391	81.3260869565217	54.7391304347826	79.5	59.5652173913044	60.3913043478261	67.3369565217391	69.75	57.3152173913044	81.5869565217391	65.3478260869565	57.0217391304348	53.4782608695652	83.1304347826087	60.25	58.9347826086957	62.75	79.5217391304348	71.8478260869565	50.5434782608696	62.1086956521739	73.5978260869565	72.0869565217391	78.1195652173913	56.8913043478261	67.0217391304348	73.3369565217391	57.5217391304348	58.1195652173913	61.1847826086957	72.5652173913043	72.0869565217391	85.4021739130435	72.7608695652174	78.7391304347826	68.267722826087	0.887127698109423
ZBTB3	54.8478260869565	74.7608695652174	58.1956521739131	51.9130434782609	45.6956521739131	60.8913043478261	61.9565217391304	38.2826086956522	54.804347826087	64.3586956521739	39.2173913043478	60.8478260869565	67.4782608695652	62.6739130434783	41.2608695652174	66.804347826087	72.7826086956522	60.1304347826087	57.1521739130435	45.0434782608696	61.5869565217391	80.804347826087	59.1521739130435	51.7173913043478	64.1086956521739	27.695652173913	55.9782608695652	52.2826086956522	44.3478260869565	65.9347826086957	61.2608695652174	62.1086956521739	68.6521739130435	51.5217391304348	49.7934782608696	64.2065217391304	41.4130434782609	55.0869565217391	67.0434782608696	50.1521739130435	37.6956521739131	66.1739130434783	56.5217391304348	68.8478260869565	47.6086956521739	73.7391304347826	57.0550567391304	0.901507343857588
NOL12	30.2717391304348	26.4782608695652	28.4239130434783	28.3260869565217	22.2826086956522	33.8913043478261	34.5652173913044	43.8260869565217	35.554347826087	44.0217391304348	44.945652173913	39.0434782608696	20.7391304347826	27.2608695652174	23.9782608695652	31.8695652173913	38.4347826086957	32.804347826087	28.6739130434783	47.7391304347826	26.195652173913	27.2608695652174	39.4347826086957	30.8913043478261	43.9347826086957	31.6521739130435	41.6195652173913	44.0652173913044	59.9130434782609	18.3695652173913	32	31.4565217391304	18.3260869565217	27.8695652173913	41.9565217391304	45.8913043478261	39.1956521739131	30.6739130434783	37.6956521739131	44.7826086956522	32.1304347826087	25.2391304347826	40.5434782608696	34.8369565217391	25.8695652173913	22.9347826086957	33.8667295652174	0.889648590329701
EIF4A1P7	19.3695652173913	27.5434782608696	17.3804347826087	26.2608695652174	29.3804347826087	28.8695652173913	23.8913043478261	29.0434782608696	22.5217391304348	15.8260869565217	25.3695652173913	11.9565217391304	27.054347826087	25.0869565217391	21.2608695652174	24.2826086956522	27.6521739130435	17.4565217391304	19.2608695652174	12.6739130434783	49.0652173913044	26.2608695652174	39.4347826086957	15.2391304347826	18.6630434782609	25.9130434782609	10.7391304347826	46.6413043478261	34.3804347826087	28.7391304347826	41.2608695652174	19.2065217391304	25.945652173913	23.6521739130435	18.3913043478261	33.5869565217391	37.6304347826087	28.6739130434783	27.9347826086957	23.0869565217391	24.8260869565217	29.0217391304348	22.6521739130435	30.8260869565217	17.8804347826087	31.5	25.7237706521739	0.479832444755501
IPO5P1	51.6304347826087	47.8913043478261	46.4021739130435	65.4565217391304	51.7608695652174	47.5869565217391	36.4239130434783	64.7391304347826	43.054347826087	89.9673913043478	47.3478260869565	64.5434782608696	31.8913043478261	48.054347826087	53.9347826086957	53.25	40.2934782608696	38.5434782608696	67.5217391304348	62.1956521739131	49.0652173913044	46.4130434782609	45.7173913043478	39.3260869565217	51.0869565217391	24.1739130434783	46.6739130434783	43.1630434782609	31.0326086956522	74.7826086956522	43.6086956521739	46.3260869565217	36.7391304347826	55.9347826086957	32	31.195652173913	44.5652173913044	61.6739130434783	36.5434782608696	39.4347826086957	33.3695652173913	73.5978260869565	28.304347826087	50.5869565217391	39.0434782608696	61.9565217391304	48.2348771739131	0.361237401146808
AC097662.1	37.0869565217391	32.3260869565217	25.2391304347826	35.0652173913044	17.6739130434783	22.4565217391304	21.2608695652174	27.2391304347826	28.2173913043478	29.3913043478261	32.195652173913	20.9347826086957	38.8478260869565	37.0217391304348	41.2608695652174	37.9565217391304	21.9565217391304	24.7391304347826	29.6739130434783	31.75	18.5869565217391	48.6521739130435	18.9239130434783	30.8913043478261	32.4130434782609	31.6521739130435	32.3586956521739	18.6086956521739	31.0326086956522	35	21.0434782608696	22.1086956521739	22.3695652173913	37.9347826086957	26.4239130434783	32.0760869565217	26.2608695652174	44.0326086956522	29.2717391304348	22.1304347826087	30.9565217391304	36.1847826086957	12.4782608695652	33.6086956521739	22.1086956521739	39.1413043478261	29.3161623913044	0.873110250020673
LINC02577	46.7173913043478	42.1630434782609	52.304347826087	49.0217391304348	40.6630434782609	33.8913043478261	46.1521739130435	67.2065217391304	33.9347826086957	50.4891304347826	46.0869565217391	55.3695652173913	27.054347826087	29.7173913043478	39.9565217391304	48.0217391304348	24.0217391304348	29.6086956521739	34.4347826086957	43.9347826086957	27.2065217391304	27.2608695652174	45.7173913043478	37.2717391304348	34.6304347826087	22.2826086956522	47.7826086956522	32.6521739130435	49.7934782608696	26.9130434782609	34.4347826086957	29.6521739130435	32.6086956521739	48.6630434782609	28.6739130434783	30.2717391304348	31.8369565217391	57.9021739130435	36.5434782608696	38.304347826087	38.8804347826087	37.9130434782609	47.9347826086957	37.1086956521739	38.1630434782609	41.5	39.18809	0.456360206881084
KHDRBS3	21.9782608695652	34.1304347826087	28.4239130434783	49.0217391304348	39.7391304347826	24.5434782608696	41.2065217391304	51.4673913043478	41.4782608695652	26.2717391304348	32.195652173913	32.9021739130435	28.3478260869565	42.2608695652174	46.4782608695652	32.9130434782609	54.6086956521739	30.5869565217391	37.9782608695652	39.945652173913	41.195652173913	25.25	40.6413043478261	34.5978260869565	33.5652173913044	31.6521739130435	36.0217391304348	15.9565217391304	34.3804347826087	37.9565217391304	30.8695652173913	32.4347826086957	41.3913043478261	39.0217391304348	27.5217391304348	21.304347826087	32.8913043478261	36.4891304347826	35.0869565217391	23.0869565217391	36.3913043478261	31.0217391304348	31.5	32.7391304347826	32.0652173913044	34.9565217391304	34.4884210869565	0.391220619882555
RPS20P14	21.9782608695652	29.304347826087	17.3804347826087	54.2826086956522	20.4565217391304	23.4673913043478	25.0869565217391	49.3913043478261	26.7934782608696	15.8260869565217	31.1521739130435	64.5434782608696	48.3152173913044	39.9782608695652	51.5326086956522	59.5652173913044	43.75	37.3695652173913	42.6086956521739	43.9347826086957	24.0652173913044	27.2608695652174	21.0652173913044	42.6086956521739	23.7065217391304	31.6521739130435	18.5217391304348	29.7065217391304	17.9782608695652	42.4891304347826	21.0434782608696	33.3695652173913	22.3695652173913	47.8260869565218	19.5869565217391	21.304347826087	22.3478260869565	47.6086956521739	32.7391304347826	47.5434782608696	43.1304347826087	33.0434782608696	36.1086956521739	26.1086956521739	14.8478260869565	47.5217391304348	33.5276476086957	0.800453726178888
SORBS1	20.2173913043478	35.2608695652174	33.1847826086957	50.6086956521739	44.554347826087	19.7173913043478	44.0652173913044	43.8260869565217	20.9782608695652	32	21.9782608695652	32	15.9347826086957	26.1304347826087	31.3478260869565	22.4782608695652	20.8478260869565	15	23.8913043478261	20.9347826086957	17.5652173913043	16.9782608695652	34.0217391304348	16.2173913043478	38.5	44.4130434782609	32.3586956521739	19.6304347826087	24.3260869565217	17.3913043478261	25.8695652173913	24.5760869565217	31.8586956521739	24.5434782608696	25.2826086956522	24.3260869565217	36.5434782608696	38.2826086956522	38.8478260869565	39.4347826086957	23.6304347826087	36.1847826086957	34.9130434782609	42.9021739130435	26.8913043478261	32.2608695652174	29.189272173913	0.758884159468543
LINC01806	39.8478260869565	44.8478260869565	44.5652173913044	62.5652173913044	52.6086956521739	54.4347826086957	37.6847826086957	65.6847826086957	30.9130434782609	60.2282608695652	64.7826086956522	64.5434782608696	41.2608695652174	37.0217391304348	49.0978260869565	89.4130434782609	68.9565217391304	39.8695652173913	48.4021739130435	90.7391304347826	59.4673913043478	51.5869565217391	76.9565217391304	73.4130434782609	74.0978260869565	54.2391304347826	106.108695652174	46.6413043478261	64.6195652173913	56.7391304347826	59.0434782608696	40.0978260869565	42.2608695652174	59.8260869565218	25.2826086956522	28.4239130434783	34.6086956521739	57.9021739130435	45.1630434782609	29.8695652173913	38.8804347826087	83.3478260869565	26.1304347826087	54.804347826087	61.3260869565217	62.6956521739131	54.3695656521739	0.687887951663988
FMC1	42.304347826087	54.6086956521739	35.1956521739131	39.1195652173913	49.6739130434783	41.4021739130435	46.7391304347826	31.9347826086957	63.5	49.0869565217391	52.7608695652174	53.5	47.1739130434783	45.8695652173913	38.6847826086957	53.25	32.4347826086957	43.2934782608696	36.7826086956522	56.5217391304348	35.8260869565217	53.4782608695652	34.0217391304348	55.3695652173913	32.4130434782609	48.2173913043478	42.5652173913044	48.6521739130435	49.7934782608696	30.8695652173913	49.2826086956522	40.0978260869565	28.9565217391304	41.2608695652174	53.6304347826087	54.5652173913044	39.1956521739131	40.2173913043478	52.8260869565218	32.304347826087	30.9565217391304	41.9782608695652	36.1086956521739	36.1086956521739	36.9456521739131	31.5	43.2821365217391	0.280674532404896
KIF5A	33.5217391304348	29.304347826087	34.2173913043478	34.2391304347826	28.3152173913044	22.4565217391304	22.6521739130435	39.1304347826087	16.1521739130435	24.8695652173913	24.2608695652174	23.8913043478261	17.0652173913043	16.9021739130435	25.2173913043478	29.8695652173913	16.9673913043478	22.2608695652174	16.8369565217391	28.8369565217391	22.8478260869565	18	16.6086956521739	20.2173913043478	24.8369565217391	35.3260869565217	22.7065217391304	15	21.0217391304348	21.8260869565217	18.6304347826087	22.1086956521739	19.8260869565217	33.4021739130435	16	21.304347826087	24.2391304347826	20.5978260869565	23.1086956521739	24.9782608695652	28.8260869565217	19.8260869565217	18.195652173913	20.3695652173913	17.8804347826087	22.9347826086957	23.4258039130435	0.280674532404896
LETM2	44.2282608695652	44.8478260869565	42.8913043478261	58.0217391304348	63.0217391304348	58.304347826087	49.8260869565218	62.2826086956522	43.054347826087	41.1521739130435	59.2608695652174	50.1304347826087	42.2391304347826	27.2608695652174	41.2608695652174	39.0434782608696	28.7391304347826	26.1304347826087	25.0326086956522	28.0217391304348	35.8260869565217	19.0434782608696	34.0217391304348	40.2173913043478	28.695652173913	22.2826086956522	34.4347826086957	24.304347826087	27.9130434782609	43.5434782608696	49.2826086956522	22.1086956521739	42.2608695652174	40.1195652173913	26.4239130434783	25.3913043478261	42.5	41.2717391304348	35.0869565217391	22.1304347826087	37.6956521739131	43.5869565217391	26.1304347826087	49.7826086956522	36.9456521739131	54.4347826086957	38.6996691304348	0.280674532404896
AJM1	45.0434782608696	43.9347826086957	53.3695652173913	49.5434782608696	36.195652173913	43.2173913043478	96.7934782608696	41.9782608695652	50.4130434782609	47.8478260869565	41.5	44.0978260869565	41.2608695652174	62.6739130434783	75.9347826086957	54.2826086956522	62.2173913043478	61.3369565217391	36.7826086956522	54.5652173913044	54.3369565217391	59.4782608695652	43.0652173913044	62.9347826086957	43.9347826086957	56.3152173913043	46.6739130434783	50.3478260869565	58.1956521739131	64.8152173913044	49.2826086956522	67.1739130434783	66.1956521739131	46.8260869565217	68.6521739130435	61.4782608695652	56.5760869565217	40.2173913043478	62.5652173913044	50.1521739130435	77.4673913043478	41.0217391304348	58.8695652173913	31.7282608695652	51.5326086956522	54.4347826086957	53.6361060869565	0.792908622239411
ANKRD37	33.5217391304348	26.4782608695652	30.2173913043478	27.3260869565217	27.5	28.8695652173913	33.8586956521739	24.6304347826087	30.9130434782609	14.4782608695652	24.2608695652174	27.75	24.304347826087	37.0217391304348	16.2826086956522	31.8695652173913	16.9673913043478	26.1304347826087	9.93478260869565	23	24.0652173913044	21.1739130434783	17.7391304347826	17.195652173913	19.6521739130435	16.6521739130435	20.304347826087	21.3478260869565	26.1304347826087	26.9130434782609	29.6739130434783	18.3913043478261	30.9347826086957	22.6521739130435	33.2391304347826	31.195652173913	34.6086956521739	27.6521739130435	42.6413043478261	39.4347826086957	26.8695652173913	19.8260869565217	55.304347826087	17.4130434782609	26.8913043478261	30.5869565217391	26.3870505	0.35583317303918
MTG1	154.347826086957	131.260869565217	143.282608695652	129.771739130435	131.521739130435	137.5	120.086956521739	145.54347826087	147.945652173913	188.5	185.54347826087	156.217391304348	120.978260869565	129.934782608696	100.076086956522	154.021739130435	117.717391304348	155.130434782609	142.804347826087	156.358695652174	120.782608695652	126.021739130435	140.336956521739	140.891304347826	150.586956521739	115.086956521739	164.79347826087	148.173913043478	178.45652173913	181.04347826087	156.45652173913	176.673913043478	100.673913043478	117.815217391304	142.760869565217	145.79347826087	144.20652173913	132.152173913043	127.652173913043	195.641304347826	125.728260869565	118.489130434783	178.217391304348	176.217391304348	184.271739130435	113.369565217391	144.583415217391	0.606744119727504
ISL2	68.3913043478261	70.8913043478261	49.8478260869565	57.5434782608696	46.7173913043478	56.3152173913043	55.9347826086957	51.4673913043478	97.2608695652174	65.8913043478261	41.5	60.8478260869565	74.7608695652174	97.6739130434783	69.75	60.7608695652174	64.3913043478261	78.1086956521739	60.5217391304348	65.6847826086957	65.7173913043478	63.1304347826087	69.9347826086957	54.2826086956522	55.6739130434783	46.3913043478261	47.7826086956522	76.8260869565217	81.3260869565217	59.8260869565218	82	71.0652173913044	61.7391304347826	43.9891304347826	81.1521739130435	81.5652173913044	69.3913043478261	47.6086956521739	81.9565217391305	98.2391304347826	77.4673913043478	54.5326086956522	124.880434782609	71.9565217391304	61.3260869565217	62.6956521739131	67.1025508695652	0.280674532404896
ZNF707	148.565217391304	156.804347826087	154.913043478261	113.369565217391	143.934782608696	126.923913043478	142.478260869565	121.326086956522	136.608695652174	130.510869565217	115.097826086957	120.108695652174	151.260869565217	159.521739130435	138.20652173913	136.260869565217	136.978260869565	166.826086956522	126.717391304348	148.054347826087	156.695652173913	137.228260869565	141.608695652174	128.086956521739	145.260869565217	157.673913043478	147.184782608696	151.413043478261	122.673913043478	128.554347826087	161.695652173913	158.79347826087	130.739130434783	101.95652173913	137.5	181.913043478261	152.673913043478	123.586956521739	149.630434782609	163.5	159.086956521739	108.369565217391	126.978260869565	131.282608695652	126.913043478261	94.5869565217391	139.131618695652	0.826951786625723
HTATSF1P2	82.4130434782609	81.5217391304348	75.2826086956522	97.5869565217391	55.9130434782609	73.3586956521739	86.4239130434783	112.684782608696	64.7608695652174	50.4891304347826	70.4021739130435	68.2173913043478	77.9239130434783	82.5652173913043	102.586956521739	73.7826086956522	66.3152173913043	65.9673913043478	64.7608695652174	58.3586956521739	75.1956521739131	41.9565217391304	56.0217391304348	50	58.1739130434783	50.3586956521739	49.6521739130435	74.9891304347826	49.7934782608696	55.6413043478261	79.3586956521739	62.1086956521739	89.7173913043478	78.0869565217391	81.1521739130435	65.1413043478261	69.3913043478261	97.1956521739131	69.3913043478261	53.0652173913044	76.1739130434783	89.2826086956522	68.4347826086957	63.4673913043478	77.3695652173913	69.2826086956522	70.9069008695652	0.70916106604865
AC115618.3	96.4673913043478	96.7934782608696	91.5652173913043	97.5869565217391	104.467391304348	111.217391304348	79.2608695652174	100.934782608696	107.880434782609	133.630434782609	94.9347826086957	76.8913043478261	131.304347826087	90.7391304347826	89.6086956521739	88.1521739130435	130.586956521739	110.521739130435	108.260869565217	103.413043478261	142.695652173913	104.608695652174	116.478260869565	109.173913043478	141.130434782609	134.608695652174	103.565217391304	134.891304347826	104.521739130435	137.478260869565	90.8695652173913	88.6195652173913	96.8695652173913	104.358695652174	57.4565217391304	96.7173913043478	98.2608695652174	113.847826086957	99.9565217391304	62.8913043478261	93.6086956521739	112.521739130435	77.304347826087	108.717391304348	99.1086956521739	117.804347826087	104.180053478261	0.79817505505541
F12	59.5217391304348	47.8913043478261	62.6304347826087	37.8913043478261	68.0217391304348	60.8913043478261	70.7608695652174	42.804347826087	35.554347826087	61.5217391304348	61.5	42.2391304347826	64.9565217391304	61.5652173913044	43.9456521739131	50.6304347826087	54.6086956521739	48.6521739130435	49.8260869565218	36.6304347826087	56.6956521739131	55.1956521739131	43.0652173913044	54.2826086956522	57.0217391304348	42.5217391304348	33.3913043478261	35.2608695652174	58.1956521739131	39.945652173913	46.7173913043478	47.8260869565218	63.7391304347826	43.9891304347826	76.8913043478261	54.5652173913044	46.695652173913	43.0978260869565	62.5652173913044	53.8695652173913	65.6521739130435	39.054347826087	74.7608695652174	47.6956521739131	52.6739130434783	48.8695652173913	52.3104910869565	0.920866702094669
AL031587.5	75.6847826086957	100	105.630434782609	81.5217391304348	90.7391304347826	88.0434782608696	101.5	81.5869565217391	109.358695652174	103.717391304348	49.4673913043478	71.8260869565217	110.934782608696	81.5217391304348	65.0869565217391	78.5217391304348	120.282608695652	101.45652173913	106.826086956522	74.9782608695652	121.728260869565	110.25	114.445652173913	95.1630434782609	118.45652173913	116.684782608696	88.8913043478261	99.1413043478261	121.326086956522	94.9130434782609	90.8695652173913	79.0217391304348	118.260869565217	81.5217391304348	101.108695652174	90.5652173913044	119.065217391304	102.195652173913	77.304347826087	71.8586956521739	87.0978260869565	98.7934782608696	62.8478260869565	72.9130434782609	94.8913043478261	85.6521739130435	93.7750504347826	0.854761287454209
AC079949.2	34.4239130434783	36.2282608695652	31.1521739130435	35.4565217391304	47.8913043478261	45.4130434782609	40.1521739130435	39.1304347826087	87.7608695652174	78.0108695652174	104.869565217391	66.0652173913044	106.576086956522	126.282608695652	87.7608695652174	117.608695652174	126.934782608696	138.434782608696	124.565217391304	133.434782608696	107.913043478261	116.130434782609	147.913043478261	121.869565217391	107.663043478261	102.45652173913	120.413043478261	95.6086956521739	102.826086956522	112.282608695652	71.7826086956522	92.5760869565218	86.5652173913044	40.1195652173913	62.0434782608696	105.586956521739	87.0978260869565	49.4347826086957	69.3913043478261	71.8586956521739	90.8913043478261	88.5326086956522	62.8478260869565	111.173913043478	63.5	72.8260869565217	86.2925313043478	0.778924015081423
MAP6D1	43.2282608695652	44.8478260869565	51.0217391304348	63.5	52.6086956521739	40.4130434782609	42.804347826087	63.1304347826087	72.5652173913043	46.6304347826087	47.3478260869565	60.8478260869565	76.7717391304348	66.8586956521739	37.2173913043478	45.1413043478261	72.7826086956522	41.0869565217391	57.1521739130435	69.7717391304348	95.554347826087	56.2717391304348	59.1521739130435	70.7282608695652	62.1413043478261	75.1956521739131	70.6521739130435	61.8478260869565	59.9130434782609	73.8913043478261	47.9130434782609	50.5869565217391	38.1739130434783	86.4565217391304	68.6521739130435	29.4782608695652	53.0217391304348	74.1956521739131	60.9782608695652	36.1739130434783	50.8913043478261	70.5869565217391	36.1086956521739	27.8586956521739	31.0326086956522	55.3260869565218	56.4893665217391	0.606744119727504
ZNF222	55.9782608695652	71.8695652173913	47.2282608695652	75.8260869565217	55.9130434782609	55.3695652173913	50.5434782608696	81.5869565217391	67.554347826087	55.1847826086957	61.5	52.4347826086957	72.0652173913044	45.8695652173913	58.7391304347826	60.7608695652174	54.6086956521739	53.3695652173913	41.2826086956522	60.1304347826087	77.3260869565217	67.7826086956522	66.2173913043478	53.4782608695652	58.1739130434783	50.3586956521739	49.6521739130435	51.2934782608696	49.7934782608696	55.6413043478261	61.2608695652174	79.7391304347826	52.5652173913044	73.0869565217391	75.5434782608696	71.9347826086957	57.4565217391304	62.6304347826087	70.4021739130435	64.9891304347826	39.8586956521739	87.9782608695652	54.1304347826087	77.8695652173913	65.9347826086957	77.9673913043478	61.5408793478261	0.358088743446804
ACOT11	53.5869565217391	40.1521739130435	37.8695652173913	42.1304347826087	32.4782608695652	47.5869565217391	52.6739130434783	33.5652173913044	50.4130434782609	45.5217391304348	36.4021739130435	49.1086956521739	36.5434782608696	41.1521739130435	41.2608695652174	48.8695652173913	43.75	58.304347826087	57.1521739130435	46.3804347826087	44.2282608695652	49.5217391304348	51.6739130434783	49.1739130434783	48.0217391304348	35.3260869565217	61.4782608695652	54.1086956521739	42.6304347826087	33.8260869565217	60.2282608695652	54.6413043478261	73.5978260869565	49.6739130434783	44.1739130434783	61.4782608695652	53.0217391304348	31.7608695652174	43.9347826086957	59.2608695652174	47.8260869565218	45.6195652173913	63.9782608695652	58.5434782608696	41.0869565217391	33.1847826086957	47.5413515217391	0.335949331810437
SOS1-IT1	45.8478260869565	73.7391304347826	83.8586956521739	96.4347826086957	76.9347826086957	78.1086956521739	57.7282608695652	114.195652173913	47.7826086956522	55.1847826086957	44.945652173913	81.9565217391305	31.8913043478261	58.2065217391304	53.9347826086957	65.804347826087	41.4782608695652	42.1739130434783	77.7282608695652	76.1847826086957	58.5	64.25	74.804347826087	72.25	67.8152173913044	65.5217391304348	84.8152173913043	72.4347826086957	49.7934782608696	78.0652173913044	80.5434782608696	81.5869565217391	96.8695652173913	85.8586956521739	46.7173913043478	47.9130434782609	82.6304347826087	112.20652173913	95.9673913043478	50.1521739130435	67	102.021739130435	50.5869565217391	53.9782608695652	77.3695652173913	77.9673913043478	69.6030243478261	0.70916106604865
FLG-AS1	125.239130434783	84.2065217391304	100.95652173913	136.695652173913	124.760869565217	85.7608695652174	88.8586956521739	154.989130434783	100.086956521739	67.0760869565217	88.3913043478261	98.0978260869565	85.9673913043478	87.3260869565217	97.3913043478261	99.1521739130435	87.7065217391304	72.2282608695652	128.119565217391	113.195652173913	89.6413043478261	70.3695652173913	101.076086956522	76.804347826087	65.054347826087	71.1847826086957	75.8260869565217	50.3478260869565	56.5	87.1521739130435	79.3586956521739	64.9021739130435	83.3586956521739	114.79347826087	130.054347826087	68.0217391304348	55.6413043478261	109.065217391304	72.7173913043478	80.7608695652174	72.5434782608696	129.608695652174	111.521739130435	79.6739130434783	57.1739130434783	130.217391304348	91.512525	0.425742118777332
DMRTA1	88.6630434782609	88.1739130434783	66.0652173913044	79.3913043478261	78.804347826087	90.7826086956522	73.2391304347826	116.217391304348	75.1956521739131	74.5326086956522	89.5869565217391	66.0652173913044	62.8913043478261	48.054347826087	50.3478260869565	48.0217391304348	67.2282608695652	56.0652173913044	66.0652173913044	72.0434782608696	60.5217391304348	71.3695652173913	56.0217391304348	89.3260869565217	60.9782608695652	60.25	74.054347826087	72.4347826086957	82.9565217391304	78.0652173913044	68.25	74.7391304347826	75.1630434782609	111.304347826087	67.3913043478261	66.054347826087	63.7826086956522	91.9565217391304	60.9782608695652	71.8586956521739	67	75.2173913043478	60.8478260869565	69.8804347826087	78.4782608695652	88.6304347826087	72.9336004347826	0.86388751233461
AC126474.2	82.4130434782609	121.152173913044	92.4347826086957	140.760869565217	88.5217391304348	87.0217391304348	69.2608695652174	154.989130434783	100.086956521739	124.880434782609	125.728260869565	184.760869565217	114.282608695652	105.347826086957	151.369565217391	177.054347826087	142.576086956522	118.521739130435	180.391304347826	208.891304347826	128.717391304348	115.086956521739	145.369565217391	158.423913043478	137.989130434783	161.413043478261	155.673913043478	93.9239130434783	129.869565217391	145.260869565217	114.576086956522	106.065217391304	90.6521739130435	158.934782608696	91.1630434782609	86.1521739130435	86.1195652173913	144.586956521739	109.086956521739	64.9891304347826	73.8913043478261	159.630434782609	88.6956521739131	87.2608695652174	104.608695652174	156.423913043478	123.152412608696	0.490953655139219
ZSCAN12	120.358695652174	143.95652173913	151.369565217391	231.760869565217	153.163043478261	158.79347826087	162.717391304348	212.79347826087	173.402173913044	176.336956521739	169.652173913043	196.652173913043	131.304347826087	122.478260869565	143.630434782609	176.108695652174	170.565217391304	132.45652173913	128.119565217391	165.641304347826	138.652173913043	142.608695652174	164.347826086957	172.282608695652	151.152173913043	154.021739130435	176.869565217391	125.304347826087	157.815217391304	176.45652173913	163.978260869565	158.79347826087	158.510869565217	178.217391304348	149.673913043478	140.391304347826	167.586956521739	182.826086956522	182.815217391304	174.717391304348	141.326086956522	196.326086956522	165.021739130435	158.217391304348	188.108695652174	206.934782608696	162.917773913043	0.606744119727504
C19orf25	95.5652173913044	101.804347826087	60.9565217391304	80	95.7173913043478	59.1086956521739	101.5	93.7173913043478	79.4456521739131	68.554347826087	97.1956521739131	115.369565217391	83.5217391304348	72.5217391304348	51.5326086956522	73.7826086956522	98.1956521739131	75.9456521739131	77.7282608695652	76.1847826086957	96.8478260869565	73.7391304347826	69.9347826086957	94	82.0434782608696	89.6739130434783	67.8478260869565	93.1521739130435	86.2173913043478	71.8478260869565	68.25	82.5652173913043	90.6521739130435	77.054347826087	82.4239130434783	94.8152173913043	63.7826086956522	72.3478260869565	84.4239130434783	67.8913043478261	71.3478260869565	82.5652173913043	79.6304347826087	62.3586956521739	87.0652173913044	82.6086956521739	81.1616256521739	0.490953655139219
ERV3-1	50.5978260869565	61.7391304347826	59.1304347826087	67.4782608695652	61.1630434782609	69.8695652173913	47.5108695652174	59.0434782608696	60.8586956521739	47.8478260869565	56.1630434782609	57.2608695652174	54.7391304347826	51.3260869565217	49.0978260869565	64.8260869565217	39.4673913043478	45.6304347826087	33.1521739130435	60.1304347826087	49.0652173913044	40.1086956521739	63.8478260869565	51.7173913043478	33.5652173913044	48.2173913043478	50.5869565217391	43.1630434782609	53.1521739130435	56.7391304347826	40.1086956521739	46.3260869565217	47.7173913043478	66.1304347826087	44.1739130434783	33.5869565217391	39.1956521739131	69.4347826086957	65	62.8913043478261	47.8260869565218	48.7391304347826	54.1304347826087	60.5434782608696	56.0217391304348	53.4347826086957	52.6620982608696	0.694165792116671
MRAP2	52.5217391304348	61.7391304347826	59.1304347826087	40.6739130434783	35.3586956521739	68.9130434782609	48.6521739130435	35.4565217391304	44.7391304347826	41.1521739130435	47.3478260869565	48.0326086956522	47.1739130434783	49.25	47.804347826087	61.9021739130435	57.2173913043478	59.25	48.4021739130435	63.3260869565217	45.1630434782609	55.1956521739131	65.0652173913043	73.4130434782609	83.1304347826087	58.3695652173913	59.7608695652174	60.8260869565218	58.1956521739131	49.4565217391304	45.6521739130435	87.5652173913043	63.7391304347826	75.8913043478261	83.5869565217391	64.2065217391304	47.9130434782609	41.2717391304348	54.1086956521739	53.8695652173913	54.8695652173913	47.7826086956522	36.1086956521739	63.4673913043478	63.5	53.4347826086957	55.7301508695652	0.465162601260353
PDF	60.5	51.5652173913044	44.5652173913044	41.195652173913	44.554347826087	25.7391304347826	72.7173913043478	41.9782608695652	56.3913043478261	49.0869565217391	49.4673913043478	61.5434782608696	81.3260869565217	61.5652173913044	56.5	45.1413043478261	44.7717391304348	102.869565217391	43.8260869565217	42.1521739130435	71.7065217391304	73.7391304347826	37.2608695652174	48.1304347826087	47.3260869565217	54.2391304347826	24.3586956521739	53.1956521739131	38	22.8478260869565	61.2608695652174	29.6521739130435	47.7173913043478	48.6630434782609	74.3913043478261	55.7608695652174	37.6304347826087	36.4891304347826	54.1086956521739	41.2608695652174	42.1304347826087	46.6739130434783	69.75	61.4891304347826	25.8695652173913	35.7934782608696	50.3674391304348	0.618101481846217
ZNF513	129.04347826087	93.7608695652174	116.304347826087	72.6739130434783	90.7391304347826	106.565217391304	99.4130434782609	80.6521739130435	138.391304347826	148.173913043478	107.402173913043	84.0652173913044	126.804347826087	100.95652173913	100.076086956522	89.4130434782609	79.304347826087	112.608695652174	81.554347826087	79.6086956521739	106.967391304348	138.108695652174	103.108695652174	92	110.184782608696	98.8260869565217	65.8260869565217	124.282608695652	90.9021739130435	95.9782608695652	114.576086956522	118.695652173913	92.7391304347826	83.2391304347826	145.521739130435	157.847826086957	108.369565217391	70.1195652173913	120.326086956522	111.836956521739	124.565217391304	85.2826086956522	109.25	128.184782608696	114.413043478261	84.304347826087	105.06450826087	0.647430613614367
GPSM1	115.608695652174	66.8586956521739	87.195652173913	81.8478260869565	77.9347826086957	100.065217391304	102.217391304348	61.4891304347826	131.04347826087	61.5217391304348	70.4021739130435	72.6304347826087	128.934782608696	89.7173913043478	73.2826086956522	83.5217391304348	100.239130434783	87	87.0652173913044	82.5652173913043	111.304347826087	103.663043478261	99.9239130434783	90.9565217391304	85.4021739130435	107.630434782609	88.8913043478261	107.163043478261	89.4130434782609	84.4782608695652	104.630434782609	97.2391304347826	93.6304347826087	74.9565217391304	164	112.45652173913	77.0434782608696	73.3369565217391	85.8478260869565	72.7826086956522	87.8913043478261	63.0217391304348	84.4130434782609	87.2608695652174	74.6086956521739	69.2826086956522	90.2688984782609	0.872319697382226
SMIM8	124.336956521739	95.5869565217391	121.510869565217	159.760869565217	117.782608695652	140.630434782609	110.04347826087	194.326086956522	72.5652173913043	88.5217391304348	110.945652173913	146.858695652174	88.445652173913	93.9130434782609	89.6086956521739	113.326086956522	89.6086956521739	48.6521739130435	128.119565217391	131.369565217391	89.6413043478261	72.5434782608696	90.9565217391304	131.130434782609	129.04347826087	102.45652173913	141.478260869565	107.163043478261	95.7826086956522	152.413043478261	98.7934782608696	94.6521739130435	100.04347826087	146.119565217391	102.402173913043	73.0108695652174	114.282608695652	135.173913043478	98.5217391304348	111.836956521739	109.413043478261	206.902173913043	123.630434782609	112.304347826087	134.45652173913	173.065217391304	115.502838043478	0.661472420016081
COL6A2	198.152173913043	161.369565217391	157.152173913043	124.902173913043	197.391304347826	148.836956521739	194.478260869565	122.891304347826	212.95652173913	149.630434782609	116.108695652174	92.8695652173913	215.5	166.619565217391	167.54347826087	136.260869565217	175.75	166.826086956522	142.804347826087	112.163043478261	216.760869565217	174.521739130435	138.608695652174	133.608695652174	140.282608695652	157.673913043478	115.434782608696	159.467391304348	142.760869565217	113.347826086957	153.347826086957	164.195652173913	196.021739130435	131.673913043478	177.978260869565	200.760869565217	163.391304347826	122.260869565217	163.608695652174	177.021739130435	139.04347826087	124.869565217391	193.152173913043	149.608695652174	151.304347826087	115.967391304348	156.019145	0.86388751233461
HNF1A	133.239130434783	121.152173913044	106.478260869565	70.2826086956522	99.1304347826087	90.7826086956522	121.304347826087	71.6086956521739	65.9565217391304	78.0108695652174	71.5652173913044	65.0869565217391	61.8913043478261	99.9565217391304	116.358695652174	85.5217391304348	80.5	67.3369565217391	72.804347826087	63.3260869565217	76.4565217391304	86.304347826087	61.6521739130435	59.1521739130435	80.1956521739131	86.0434782608696	70.6521739130435	87.1304347826087	72.5	70.8478260869565	65.9347826086957	69.2391304347826	82.6521739130435	66.1304347826087	75.5434782608696	100.815217391304	78.054347826087	86.3478260869565	72.7173913043478	101.29347826087	104.913043478261	62.0760869565217	98.1304347826087	91	70.8478260869565	80.5217391304348	82.5966434782609	0.611032705837136
Z95331.1	54.8478260869565	55.3695652173913	86.2173913043478	65.4565217391304	112.130434782609	36.1086956521739	40.6739130434783	80.6521739130435	26.7934782608696	36.0108695652174	48.2173913043478	42.2391304347826	51.9130434782609	22.6847826086957	35.9565217391304	45.1413043478261	41.4782608695652	32.804347826087	75.0434782608696	50.5434782608696	37.9782608695652	37.1304347826087	43.0652173913044	50.7282608695652	44.7608695652174	46.3913043478261	40.6304347826087	40.4782608695652	38	39.945652173913	32	36.7826086956522	34.3260869565217	54.804347826087	27.5217391304348	41.0434782608696	29.9347826086957	67.7391304347826	35.0869565217391	29.8695652173913	26.8695652173913	66.1739130434783	30.4347826086957	33.6086956521739	27.9130434782609	62.6956521739131	45.5694697826087	0.280674532404896
AC245060.4	101.108695652174	112.967391304348	81.6086956521739	116.173913043478	102.217391304348	101.70652173913	110.04347826087	94.7608695652174	165.695652173913	166.423913043478	112.195652173913	69.2173913043478	164.739130434783	154.717391304348	164.086956521739	99.1521739130435	110.945652173913	136.326086956522	145.673913043478	68.6956521739131	116.847826086957	95.554347826087	130.934782608696	49.1739130434783	90.2608695652174	87.8586956521739	52.4782608695652	110.184782608696	87.7934782608696	112.282608695652	112.304347826087	80.5978260869565	101.45652173913	133.565217391304	109	121.945652173913	109.978260869565	106.380434782609	130.847826086957	124.065217391304	121.847826086957	100.760869565217	144.978260869565	99.4782608695652	98.1086956521739	89.5869565217391	110.798443478261	0.847825492399058
ZNF175	133.239130434783	163.130434782609	156.097826086957	162.652173913043	167.260869565217	139.652173913043	122.804347826087	163.445652173913	109.358695652174	167.760869565217	168.576086956522	219.086956521739	136.54347826087	129.934782608696	114.076086956522	181.95652173913	135.739130434783	132.45652173913	145.673913043478	204.760869565217	127.717391304348	157.891304347826	133.95652173913	204.271739130435	143.95652173913	121.728260869565	281.95652173913	151.413043478261	150.054347826087	185.54347826087	152.065217391304	169.826086956522	185.826086956522	170.630434782609	135.217391304348	130.663043478261	140.760869565217	153.630434782609	154.086956521739	173.586956521739	144.108695652174	202.173913043478	130.358695652174	187.282608695652	159.554347826087	199.945652173913	158.748108695652	0.614921863471352
IGF2	226.652173913043	84.9347826086957	73.1195652173913	36.554347826087	58.1630434782609	89.804347826087	88.8586956521739	54.2826086956522	73.7608695652174	177.608695652174	109.771739130435	91.1739130434783	114.282608695652	102.076086956522	80.3695652173913	67.8478260869565	76.8260869565217	109.25	121.945652173913	88.054347826087	84.4130434782609	142.608695652174	99.9239130434783	85.0326086956522	95.3695652173913	94.8695652173913	58.9347826086957	111.717391304348	79.5217391304348	51.5217391304348	102.130434782609	105.076086956522	71.6086956521739	80.304347826087	263.086956521739	57.8913043478261	62.7173913043478	47.6086956521739	47.8369565217391	58.1195652173913	61.1847826086957	35.1956521739131	51.8478260869565	47.6956521739131	50.4891304347826	70.2282608695652	87.875475	0.29937308481829
GSTZ1	148.565217391304	207.195652173913	193.586956521739	124.902173913043	193.021739130435	204.130434782609	191.902173913044	126.804347826087	184.152173913043	206.695652173913	194.717391304348	133.391304347826	145.195652173913	209.239130434783	172.684782608696	136.260869565217	175.75	189.619565217391	149.673913043478	156.358695652174	177.608695652174	196.478260869565	152.282608695652	139.152173913043	168.130434782609	176.54347826087	151.021739130435	211.467391304348	180.195652173913	136.576086956522	165.315217391304	200.673913043478	188.826086956522	112.282608695652	130.054347826087	227.934782608696	160.847826086957	147.097826086957	184.152173913043	206.95652173913	205.423913043478	145.5	150.04347826087	202.565217391304	210.978260869565	110.076086956522	171.348539130435	0.987939754804783
HLA-DMA	50.5978260869565	56.3695652173913	66.0652173913044	91.0543478260869	38.8260869565217	51.7173913043478	69.2608695652174	91.3478260869565	46.3478260869565	51.6304347826087	55	68.2173913043478	28.3478260869565	54.7391304347826	94.8152173913043	76.8586956521739	39.4673913043478	58.304347826087	84.7608695652174	59.2391304347826	41.195652173913	39.0434782608696	66.2173913043478	59.1521739130435	46.4021739130435	56.3152173913043	52.4782608695652	50.3478260869565	74.5326086956522	53.4782608695652	43.6086956521739	59.0434782608696	50.0217391304348	57.0217391304348	40.8695652173913	48.9782608695652	70.6521739130435	70.1195652173913	69.3913043478261	96.3478260869565	96.9239130434783	58.1630434782609	67.0652173913044	82.4565217391304	82.4565217391304	54.4347826086957	61.2974958695652	0.508274788764148
AHRR	47.8260869565218	54.6086956521739	68.9130434782609	58.5434782608696	60.2391304347826	56.3152173913043	46.1521739130435	49.3913043478261	64.7608695652174	50.4891304347826	52.7608695652174	54.4347826086957	106.576086956522	59.2717391304348	70.9565217391304	59.5652173913044	75.804347826087	96.8260869565217	89.5869565217391	101.108695652174	59.4673913043478	101.29347826087	73.3695652173913	95.1630434782609	87.5108695652174	76.9456521739131	85.8695652173913	51.2934782608696	64.6195652173913	67.9347826086957	70.6521739130435	71.0652173913044	66.1956521739131	57.6847826086957	47.804347826087	47.9130434782609	44.5652173913044	64.6739130434783	58.7282608695652	60.2826086956522	53.5	52.554347826087	44.8478260869565	51.5434782608696	49.5	43.9565217391304	64.6318536956522	0.361237401146808
AP001453.2	47.8260869565218	45.8913043478261	45.6086956521739	46.695652173913	31.2065217391304	30.0217391304348	57.0217391304348	58.1521739130435	59.3913043478261	52.7391304347826	50.5869565217391	53.5	68.7173913043478	36.1304347826087	49.0978260869565	56.2173913043478	57.2173913043478	39.8695652173913	34.4347826086957	43.0652173913044	71.7065217391304	50.5869565217391	57.0217391304348	50.7282608695652	45.5326086956522	37.2282608695652	56.8913043478261	50.3478260869565	62.7934782608696	53.4782608695652	54	37.7391304347826	46.804347826087	36.9239130434783	47.804347826087	55.7608695652174	36.5434782608696	48.5869565217391	60.9782608695652	38.304347826087	44.3260869565217	53.5760869565218	44.8478260869565	53.9782608695652	55	47.5217391304348	49.1826563043478	0.961997517770803
TMEM45A	203.173913043478	133.847826086957	149.25	150.282608695652	134.195652173913	165.641304347826	133.521739130435	195.195652173913	122.086956521739	144.467391304348	167.358695652174	140.282608695652	107.630434782609	110.95652173913	127.152173913044	137.326086956522	121.239130434783	109.25	109.489130434783	134.45652173913	99.2173913043478	112.630434782609	116.478260869565	125.326086956522	117.5	139.586956521739	109.152173913043	94.695652173913	128.086956521739	149.630434782609	127.826086956522	126.369565217391	123.260869565217	180.728260869565	162.119565217391	118.173913043478	138.467391304348	180.760869565217	162.423913043478	125.20652173913	139.04347826087	188.521739130435	137.45652173913	151.54347826087	133.434782608696	192.076086956522	138.620042173913	0.736531759772177
MTRNR2L12	89.8260869565217	75.8152173913044	124.978260869565	51.4456521739131	66.1956521739131	85.7608695652174	94.3478260869565	37.4130434782609	69.4130434782609	37.4347826086957	47.3478260869565	67.1739130434783	63.7826086956522	53.5869565217391	58.7391304347826	86.5217391304348	69.7608695652174	75.9456521739131	26.1413043478261	93.304347826087	65.7173913043478	96.5652173913043	78.0652173913044	78.6739130434783	82.0434782608696	76.9456521739131	69.6304347826087	82.2391304347826	95.7826086956522	80.0869565217391	87.304347826087	88.6195652173913	102.402173913043	52.5652173913044	59.2608695652174	89.4782608695652	89.2391304347826	71.5652173913044	72.7173913043478	66.0434782608696	59.1086956521739	44.554347826087	50.5869565217391	67.8478260869565	109.086956521739	66.9130434782609	72.9995302173913	0.901507343857588
BATF3	92.2391304347826	80.4347826086957	61.7391304347826	71.3695652173913	66.1956521739131	75.8152173913044	67.3913043478261	65.6847826086957	65.9565217391304	68.554347826087	56.1630434782609	64.5434782608696	91.9130434782609	96.2608695652174	80.3695652173913	94.3478260869565	88.6304347826087	123.891304347826	82.804347826087	99.0760869565217	75.1956521739131	86.304347826087	81.554347826087	86.054347826087	92.5217391304348	86.0434782608696	75.8260869565217	134.891304347826	66.6086956521739	83.6956521739131	92.0434782608696	96.5652173913043	88.0652173913044	62.6739130434783	94.695652173913	110.608695652174	94.4347826086957	70.8478260869565	110.217391304348	99.1304347826087	75.1304347826087	62.0760869565217	94.5869565217391	92.0434782608696	93.5869565217391	60.25	83.8920136956522	0.309344296585431
RNF227	45.8478260869565	49.6739130434783	51.0217391304348	52.3913043478261	41.4347826086957	57.2717391304348	37.6847826086957	43.8260869565217	75.1956521739131	58.9565217391304	43.9347826086957	57.2608695652174	77.9239130434783	63.7826086956522	51.5326086956522	66.804347826087	66.3152173913043	64.7608695652174	40.1195652173913	61	68.6521739130435	83.1956521739131	47.6630434782609	77.8478260869565	68.6521739130435	71.1847826086957	50.5869565217391	64.8369565217391	44.3478260869565	51.5217391304348	70.6521739130435	49.5217391304348	63.7391304347826	43.0434782608696	67.3913043478261	54.5652173913044	79.6304347826087	44.0326086956522	62.5652173913044	60.9347826086957	52.0217391304348	66.1739130434783	39.4456521739131	67.8478260869565	41.0869565217391	64.4782608695652	57.877362826087	0.79817505505541
VPS37C	149.673913043478	179.45652173913	153.54347826087	156.217391304348	182.336956521739	179.673913043478	164.967391304348	125.673913043478	131.04347826087	137.152173913043	149.782608695652	137.434782608696	103.04347826087	145.70652173913	158	166.673913043478	163.79347826087	157.282608695652	177.010869565217	132.369565217391	154.29347826087	142.608695652174	150.054347826087	150.086956521739	164.967391304348	155.804347826087	132.130434782609	145.521739130435	157.815217391304	110.402173913043	182.065217391304	150.826086956522	169.152173913043	129.663043478261	122.891304347826	150.891304347826	178.847826086957	144.586956521739	172.934782608696	160.630434782609	170.826086956522	154.076086956522	152.065217391304	145.54347826087	157.282608695652	115.967391304348	151.581995652174	0.905462639618038
IFNLR1	74.7608695652174	79.3586956521739	54.4130434782609	58.0217391304348	68.0217391304348	78.1086956521739	66.0434782608696	51.4673913043478	73.7608695652174	84.6304347826087	77.0434782608696	70.1195652173913	69.7826086956522	82.5652173913043	68.6521739130435	96.3913043478261	63.4782608695652	81.4782608695652	95.7391304347826	93.304347826087	90.8695652173913	77.0434782608696	87.3260869565217	65.1956521739131	92.5217391304348	67.1195652173913	81.3260869565217	80.2717391304348	77.8478260869565	78.0652173913044	80.5434782608696	72.0869565217391	64.5760869565217	67.3913043478261	70.8478260869565	65.1413043478261	46.695652173913	90.7282608695652	52.8260869565218	70.7826086956522	58.054347826087	64.9673913043478	68.4347826086957	63.4673913043478	46.4239130434783	70.2282608695652	72.5635639130435	0.3148362553045
ZGPAT	88.6630434782609	83.3478260869565	68.9130434782609	56.0869565217391	47.8913043478261	58.304347826087	88	50.4782608695652	75.1956521739131	79.2934782608696	102.54347826087	71.8260869565217	64.9565217391304	68.9130434782609	47.804347826087	49.6739130434783	67.2282608695652	78.1086956521739	40.1195652173913	45.0434782608696	76.4565217391304	70.3695652173913	68.7173913043478	55.3695652173913	69.7173913043478	69	68.7826086956522	86.1521739130435	82.9565217391304	48.1956521739131	84.6413043478261	74.7391304347826	81.7065217391304	33.4021739130435	74.3913043478261	63.4021739130435	45.6304347826087	44.0326086956522	69.3913043478261	50.1521739130435	56.0217391304348	45.6195652173913	72.0869565217391	68.8478260869565	78.4782608695652	59.304347826087	65.8686202173913	0.645661828966365
TMEM141	66.0434782608696	60.2282608695652	52.304347826087	47.9347826086957	68.8804347826087	50.6630434782609	57.7282608695652	42.804347826087	81.1956521739131	61.5217391304348	62.4782608695652	60.8478260869565	66.0652173913044	66.8586956521739	69.75	62.9130434782609	58.2608695652174	63.7065217391304	82.804347826087	59.2391304347826	80.5217391304348	69.0652173913044	68.7173913043478	69.0217391304348	76.25	78.7826086956522	60.4782608695652	78.2391304347826	77.8478260869565	55.6413043478261	60.2282608695652	88.6195652173913	75.1630434782609	48.6630434782609	54.804347826087	79.3260869565217	70.6521739130435	43.0978260869565	72.7173913043478	63.9130434782609	73.8913043478261	66.1739130434783	83.2826086956522	64.6195652173913	52.6739130434783	60.25	65.5406426086957	0.47951726533608
SRGAP2C	157.402173913044	133.847826086957	156.097826086957	179.195652173913	174.434782608696	147.978260869565	147.858695652174	162.021739130435	192.29347826087	114.521739130435	147.913043478261	213.70652173913	183.326086956522	133	131.586956521739	202.260869565217	207.804347826087	147.652173913043	211.782608695652	272.673913043478	155.521739130435	155.282608695652	226.923913043478	256.141304347826	191.804347826087	211.065217391304	268.673913043478	177.565217391304	144.369565217391	195.010869565217	152.065217391304	145.673913043478	149.782608695652	171.54347826087	151.978260869565	111.510869565217	113.239130434783	192.130434782609	133.478260869565	127.369565217391	118.195652173913	203.032608695652	91.9239130434783	131.282608695652	171.54347826087	198.945652173913	168.769850217391	0.479832444755501
PGAP3	89.8260869565217	87.1304347826087	89.4673913043478	63.8478260869565	71.9782608695652	113.75	106.673913043478	69.8804347826087	81.1956521739131	85.9673913043478	78.054347826087	92.1413043478261	101.891304347826	109.858695652174	120.934782608696	79.5760869565217	88.6304347826087	110.521739130435	94.5869565217391	87.0434782608696	81.5869565217391	74.9782608695652	78.0652173913044	100.815217391304	98.8260869565217	75.1956521739131	74.054347826087	109.195652173913	72.5	81.3804347826087	99.9782608695652	116.967391304348	118.260869565217	71.0326086956522	101.108695652174	132.5	120.326086956522	70.1195652173913	109.086956521739	138.869565217391	125.728260869565	87.9782608695652	133.478260869565	96.2826086956522	94.8913043478261	78.7391304347826	94.889182173913	0.280674532404896
MT-TE	92.2391304347826	67.8478260869565	136.717391304348	63.8478260869565	69.8260869565217	58.304347826087	84.4347826086957	64.7391304347826	53.4347826086957	55.1847826086957	86.1521739130435	89.0434782608696	53.304347826087	43.554347826087	52.75	59.5652173913044	62.2173913043478	56.0652173913044	75.0434782608696	74.9782608695652	62.5652173913044	53.4782608695652	83.8913043478261	83.2608695652174	70.8695652173913	50.3586956521739	129.663043478261	75.9347826086957	49.7934782608696	86.1195652173913	86.0869565217391	59.0434782608696	62.75	49.6739130434783	53.6304347826087	69.9347826086957	59.4565217391304	79.9347826086957	41.3695652173913	67.0760869565217	47.8260869565218	78.0108695652174	58.8695652173913	66.6739130434783	93.5869565217391	80.5217391304348	69.5571832608696	0.724210846167281
B3GNT7	70.1956521739131	60.9130434782609	62.6304347826087	33.8260869565217	49.6739130434783	56.3152173913043	69.2608695652174	51.4673913043478	51.8478260869565	60.2282608695652	65.9782608695652	76.8913043478261	72.0652173913044	85.0869565217391	74.7173913043478	86.5217391304348	59.2608695652174	89.5217391304348	94.5869565217391	79.6086956521739	58.5	65.3478260869565	72.2282608695652	87.195652173913	81.1521739130435	73.2826086956522	67.054347826087	55.0108695652174	39.7391304347826	50.4456521739131	47.9130434782609	57.2282608695652	65.304347826087	54.804347826087	82.4239130434783	70.9021739130435	64.9130434782609	41.2717391304348	51.6304347826087	71.8586956521739	69.4130434782609	33.0434782608696	54.1304347826087	53.9782608695652	55	39.1413043478261	63.3371923913044	0.308617984401933
ARID3B	57.7282608695652	43.054347826087	39.9347826086957	59.6413043478261	43.5217391304348	51.7173913043478	52.054347826087	46.6630434782609	64.7608695652174	61.5217391304348	41.5	66.0652173913044	67.4782608695652	51.3260869565217	50.3478260869565	58.5217391304348	52.304347826087	59.25	63.4347826086957	45.0434782608696	37.9782608695652	52.5434782608696	56.0217391304348	59.1521739130435	54.3913043478261	27.695652173913	55.1195652173913	59.7173913043478	41.195652173913	51.5217391304348	59.0434782608696	51.7282608695652	52.5652173913044	57.6847826086957	60.4782608695652	65.1413043478261	43.5217391304348	56.1413043478261	35.0869565217391	60.9347826086957	57.0217391304348	46.6739130434783	62.8478260869565	47.6956521739131	45.2173913043478	41.5	52.4888939130435	0.814218540895913
PCYOX1L	67.5217391304348	96.7934782608696	100.95652173913	130.217391304348	93.8586956521739	128.086956521739	85.1086956521739	107.565217391304	64.7608695652174	68.554347826087	73.9565217391304	77.9239130434783	46	95.0108695652174	89.6086956521739	90.6956521739131	80.5	92.3260869565217	83.8586956521739	79.6086956521739	54.3369565217391	100.065217391304	81.554347826087	73.4130434782609	94.5652173913044	84.4347826086957	93.1086956521739	74.9891304347826	104.521739130435	98.1521739130435	102.130434782609	135.380434782609	134.760869565217	79.0869565217391	74.3913043478261	87.1521739130435	124.521739130435	98.3478260869565	109.086956521739	125.20652173913	107.065217391304	102.934782608696	94.5869565217391	118.95652173913	121.239130434783	74.7608695652174	93.5144113043478	0.280674532404896
FBXO8	322.25	333.380434782609	319.380434782609	387	249.913043478261	311.239130434783	302.869565217391	400.315217391304	279.913043478261	281.760869565217	341.695652173913	411.847826086956	249.010869565217	256.141304347826	252.641304347826	409.413043478261	292.04347826087	252.934782608696	286.119565217391	403.271739130435	273.076086956522	287.891304347826	258.065217391304	389.184782608696	308.369565217391	293.521739130435	361.304347826087	285.108695652174	333.434782608696	351	296.608695652174	330.130434782609	360.282608695652	408.826086956522	290.086956521739	274.913043478261	352.739130434783	360.445652173913	324.04347826087	341.630434782609	367.173913043478	419.54347826087	268.586956521739	334.673913043478	351.717391304348	404.152173913044	325.427219565217	0.479832444755501
TSPYL4	122.326086956522	168.663043478261	182.282608695652	214.891304347826	132.652173913043	146.195652173913	155.195652173913	211.945652173913	141.413043478261	140.152173913043	194.717391304348	224.934782608696	126.804347826087	160.847826086957	204.826086956522	250.304347826087	195.217391304348	155.130434782609	182.282608695652	210.065217391304	166.065217391304	133.576086956522	198.913043478261	199.173913043478	151.152173913043	181.576086956522	233.163043478261	148.173913043478	185.782608695652	209.20652173913	106.913043478261	152.29347826087	160.54347826087	188.315217391304	99	136.228260869565	159.065217391304	227.010869565217	165.04347826087	164.684782608696	155.369565217391	217.717391304348	167.923913043478	171.652173913043	195.54347826087	180.760869565217	173.384689130435	0.905462639618038
LMF1	120.358695652174	164.086956521739	171.402173913044	124.902173913043	151.782608695652	165.641304347826	175.75	108.413043478261	150.891304347826	154.076086956522	119.380434782609	120.978260869565	138.695652173913	184.608695652174	169.152173913043	121.510869565217	123.489130434783	184.673913043478	155.097826086957	114.282608695652	122.478260869565	160.195652173913	160.782608695652	143.489130434783	159.630434782609	148.217391304348	111.195652173913	139.521739130435	124.239130434783	121.847826086957	152.065217391304	160.228260869565	159.521739130435	135.565217391304	174.434782608696	200.760869565217	156.173913043478	109.782608695652	179.315217391304	248.565217391304	193.195652173913	99.9565217391304	231.782608695652	183.891304347826	178.913043478261	115.967391304348	151.97589826087	0.280674532404896
NSUN6	208.717391304348	231.652173913044	231.163043478261	323.608695652174	247.79347826087	231.717391304348	242.217391304348	297.347826086957	149.391304347826	239.847826086957	224.152173913043	203.173913043478	151.260869565217	220.847826086957	262.902173913044	220.184782608696	145.326086956522	202.630434782609	198.380434782609	164.880434782609	157.728260869565	197.54347826087	187.836956521739	156.217391304348	192.869565217391	159.586956521739	172.565217391304	217.260869565217	185.782608695652	214.673913043478	208.891304347826	225.771739130435	222.065217391304	286.923913043478	196.891304347826	212.717391304348	270.021739130435	272.565217391304	190.065217391304	289.510869565217	247.79347826087	297.217391304348	282.880434782609	225.695652173913	258.45652173913	222.304347826087	220.631143478261	0.488738648771536
PDK2	208.717391304348	243.989130434783	205.217391304348	168.902173913044	245.065217391304	214.086956521739	222.445652173913	173.934782608696	155.097826086957	224.663043478261	191.380434782609	187.326086956522	146.260869565217	173.934782608696	144.869565217391	143.152173913043	173.065217391304	176.217391304348	160.347826086957	170.630434782609	187.70652173913	177.217391304348	188.782608695652	186.097826086957	224.847826086957	184	225.065217391304	199.173913043478	217.239130434783	176.45652173913	180.086956521739	212.826086956522	227.565217391304	137.478260869565	219.228260869565	221.195652173913	211.5	149.5	169.228260869565	164.684782608696	198.380434782609	194.717391304348	191.869565217391	254.978260869565	241.717391304348	179.619565217391	192.401469565217	0.688956493998473
EP400P1	196.717391304348	172.608695652174	207.29347826087	204.271739130435	236.195652173913	193.065217391304	183.358695652174	204.04347826087	202.630434782609	230.45652173913	182.815217391304	180.608695652174	215.5	167.630434782609	163.130434782609	162.217391304348	158.869565217391	153.04347826087	218.565217391304	162.967391304348	184.271739130435	198.782608695652	179.782608695652	172.282608695652	223.510869565217	211.065217391304	209.239130434783	179.021739130435	198.380434782609	210.391304347826	226.739130434783	185.304347826087	153.173913043478	210.826086956522	205.95652173913	218.195652173913	184.021739130435	192.130434782609	159.869565217391	189.728260869565	179.782608695652	217.717391304348	169.195652173913	197.782608695652	170.173913043478	209.347826086957	192.014408695652	0.881974973452922
NOCT	205.086956521739	165.04347826087	165.086956521739	190.847826086957	158.5	146.978260869565	158.521739130435	191.326086956522	211.5	144.467391304348	137.195652173913	154.989130434783	165.521739130435	127.565217391304	158	141.391304347826	180.45652173913	104.217391304348	112.260869565217	143.521739130435	154.29347826087	107.695652173913	153.391304347826	165.076086956522	130.021739130435	154.021739130435	158.391304347826	142.380434782609	184.04347826087	141.413043478261	171.478260869565	123.586956521739	164.913043478261	166.304347826087	167.021739130435	148.086956521739	123.521739130435	190.826086956522	163.608695652174	111.836956521739	140.347826086957	173.195652173913	119.326086956522	90.0217391304348	122.260869565217	175.934782608696	152.293007391304	0.280674532404896
ALKBH6	94.6521739130435	97.9891304347826	101.804347826087	91.8586956521739	75.8260869565217	70.7173913043478	81.6086956521739	95.8586956521739	106.217391304348	91.5652173913043	120.630434782609	109.152173913043	100.45652173913	77.0652173913044	70.9565217391304	115.847826086957	80.5	101.45652173913	60.5217391304348	105.826086956522	102.804347826087	106.619565217391	105.782608695652	96.9239130434783	126.826086956522	75.1956521739131	117.010869565217	124.282608695652	112.717391304348	124.108695652174	93.2717391304348	89.6086956521739	76.8913043478261	93.2934782608696	75.5434782608696	121.945652173913	125.652173913043	114.826086956522	90.1739130434783	86.4239130434783	77.4673913043478	84.2608695652174	88.6956521739131	107.597826086957	139.413043478261	97.1956521739131	97.9357265217391	0.593754333164763
CRTC1	109.217391304348	99	128.847826086957	89.2608695652174	110.945652173913	123.489130434783	130.663043478261	89.7717391304348	144.336956521739	99.4456521739131	88.3913043478261	86.1521739130435	122.434782608696	158.152173913043	138.20652173913	108.54347826087	129.195652173913	110.521739130435	153.347826086957	121.869565217391	114.282608695652	130.29347826087	117.75	96.9239130434783	131.184782608696	118.45652173913	109.152173913043	117.923913043478	129.869565217391	82.6086956521739	114.576086956522	110.554347826087	119.945652173913	109.086956521739	148.5	141.163043478261	116.130434782609	106.380434782609	106.782608695652	158.217391304348	144.108695652174	80.0869565217391	144.978260869565	124.891304347826	82.4565217391304	84.304347826087	117.008745	0.872319697382226
PRAF2	340.913043478261	280.326086956522	235.869565217391	252.326086956522	233.315217391304	272.978260869565	262.45652173913	257.826086956522	301.630434782609	280.152173913044	226.695652173913	263.739130434783	265.847826086957	238.45652173913	255.086956521739	237.619565217391	248.304347826087	272.815217391304	217.130434782609	252.152173913043	237.173913043478	245	282.086956521739	243.065217391304	247.79347826087	297.423913043478	228.586956521739	261.45652173913	283.891304347826	263.934782608696	232.086956521739	267.021739130435	271.869565217391	254.728260869565	256.532608695652	291.152173913044	299.076086956522	239.630434782609	282.20652173913	237	256.717391304348	259.04347826087	293.782608695652	334.673913043478	269.434782608696	296.108695652174	263.633036956522	0.37675490927431
ACSF3	211.630434782609	196.847826086957	190.423913043478	203.478260869565	238.576086956522	222.597826086957	219.858695652174	211.945652173913	245.5	203.032608695652	217.184782608696	157.282608695652	232.782608695652	293.021739130435	233.163043478261	194.478260869565	209.04347826087	234.358695652174	253.04347826087	163.978260869565	199.108695652174	224.630434782609	201.521739130435	175.413043478261	189.728260869565	230.282608695652	186.097826086957	212.760869565217	195.20652173913	191.836956521739	229.554347826087	219.032608695652	264.217391304348	214.239130434783	207.29347826087	278.423913043478	237.5	223.510869565217	243.771739130435	329.75	259.597826086957	205.70652173913	328.54347826087	236.402173913044	229.445652173913	157.402173913044	221.808836956522	0.280674532404896
UBALD1	251.413043478261	182.891304347826	234.195652173913	151.021739130435	196.380434782609	156.847826086957	236.130434782609	139.217391304348	248.152173913044	173.45652173913	161.934782608696	130.29347826087	234.163043478261	295.326086956522	187.260869565217	141.391304347826	201.826086956522	204.217391304348	204.108695652174	150.771739130435	217.739130434783	210.217391304348	186.032608695652	160.336956521739	243.771739130435	195.369565217391	148.673913043478	233.086956521739	172.086956521739	206.608695652174	221.934782608696	228.934782608696	253.815217391304	132.45652173913	192.782608695652	274.913043478261	190.902173913044	123.586956521739	212.239130434783	202.565217391304	232.576086956522	150.858695652174	238.5	182.336956521739	203.891304347826	122.326086956522	196.077032608696	0.961137282092571
SLC30A4	300.260869565217	306.108695652174	279.586956521739	329.532608695652	286.695652173913	246.869565217391	228.586956521739	322.065217391304	326.847826086957	269.847826086957	248.565217391304	341.5	345.869565217391	238.45652173913	240.70652173913	312.336956521739	308.728260869565	277.152173913044	263.739130434783	356.04347826087	262.804347826087	301.891304347826	318.95652173913	369.380434782609	286.923913043478	273.586956521739	369.119565217391	290.978260869565	293.782608695652	338.70652173913	322.782608695652	306.95652173913	338.782608695652	397.010869565217	381.108695652174	261.239130434783	312.978260869565	389.184782608696	269.108695652174	252.326086956522	237.565217391304	415.304347826087	298.130434782609	327.858695652174	306.630434782609	426.391304347826	308.238895652174	0.292122882576362
MTCO2P2	445.54347826087	197.782608695652	436.478260869565	100.065217391304	155.097826086957	154.217391304348	201.782608695652	68.3478260869565	160.913043478261	157.728260869565	178.652173913043	62.6630434782609	110.934782608696	148.95652173913	100.076086956522	55.3260869565218	130.586956521739	142.923913043478	108.260869565217	80.6956521739131	161.815217391304	153.923913043478	231.065217391304	65.1956521739131	239.847826086957	144.010869565217	48.6956521739131	245.217391304348	219.228260869565	290.086956521739	216.804347826087	286.95652173913	242	87.3695652173913	185.347826086957	194.663043478261	123.521739130435	117.184782608696	218.5	186.54347826087	149.119565217391	81.3804347826087	126.021739130435	218.652173913043	435.673913043478	113.369565217391	173.461485	0.800194295828362
MPV17L2	161.75	142.25	143.282608695652	119.217391304348	129.847826086957	131.304347826087	129.467391304348	127.79347826087	135.173913043478	121.695652173913	160.336956521739	122.978260869565	176.54347826087	137.065217391304	167.54347826087	117.608695652174	136.978260869565	132.45652173913	126.717391304348	121.097826086957	189.869565217391	134.739130434783	145.369565217391	137.021739130435	121.619565217391	123.684782608696	108.130434782609	156.54347826087	124.239130434783	122.75	161.695652173913	127.260869565217	136.869565217391	148.532608695652	177.978260869565	196.478260869565	156.173913043478	133.521739130435	166.70652173913	147.913043478261	162.119565217391	144.391304347826	144.978260869565	134.717391304348	130.130434782609	155.445652173913	141.956291304348	0.35583317303918
KLHL26	73.7608695652174	116.304347826087	94.5	91.0543478260869	94.8152173913043	96.5978260869565	123.586956521739	94.7608695652174	139.891304347826	118.173913043478	82.8260869565217	100.934782608696	114.282608695652	112.130434782609	98.7608695652174	109.652173913043	145.326086956522	118.521739130435	91.6195652173913	128.336956521739	142.695652173913	136.04347826087	103.108695652174	147.79347826087	99.8369565217391	144.010869565217	119.45652173913	107.163043478261	92.4347826086957	121.847826086957	82	91.6956521739131	104.086956521739	110.141304347826	113.086956521739	106.652173913043	89.2391304347826	90.7282608695652	97.2391304347826	87.5434782608696	113.369565217391	77.0652173913044	82.5652173913043	84.5217391304348	75.6521739130435	91.1739130434783	105.586724347826	0.280977609908587
CLCN2	77.2173913043478	87.1304347826087	101.804347826087	78.2391304347826	73.9782608695652	104.913043478261	90.5869565217391	87.8260869565217	129.478260869565	76.8913043478261	108.5	88.054347826087	114.282608695652	93.9130434782609	100.076086956522	111.260869565217	114.369565217391	88.1304347826087	113.75	95.8260869565217	104.869565217391	93.5869565217391	111.717391304348	80.2717391304348	90.2608695652174	84.4347826086957	98.25	110.184782608696	111.163043478261	115.967391304348	109.978260869565	79.0217391304348	81.7065217391304	117.815217391304	75.5434782608696	110.608695652174	110.663043478261	84.5652173913044	93.4782608695652	109.119565217391	107.065217391304	77.0652173913044	115.336956521739	86.1521739130435	78.4782608695652	71.0652173913044	96.6216936956522	0.905462639618038
MCOLN1	110.29347826087	132.804347826087	73.1195652173913	106.347826086957	85.8695652173913	104.010869565217	111.152173913043	84.7608695652174	103.04347826087	130.510869565217	81.7065217391304	95.4021739130435	148.869565217391	138.413043478261	139.413043478261	106.804347826087	100.239130434783	100.065217391304	109.489130434783	89.8260869565217	115.739130434783	98.2391304347826	95.5434782608696	97.6086956521739	113.326086956522	89.6739130434783	83.9782608695652	95.6086956521739	89.4130434782609	72.8586956521739	111.576086956522	102.54347826087	102.402173913043	113.782608695652	103.565217391304	134.95652173913	98.2608695652174	93.9130434782609	102.434782608696	109.804347826087	126.717391304348	80.0869565217391	159.304347826087	110.04347826087	89.9347826086957	93.0869565217391	105.142246086957	0.909423089955998
GSTZ1	148.565217391304	207.195652173913	193.586956521739	124.902173913043	193.021739130435	204.130434782609	191.902173913044	126.804347826087	184.152173913043	206.695652173913	194.717391304348	133.391304347826	145.195652173913	209.239130434783	172.684782608696	136.260869565217	175.75	189.619565217391	149.673913043478	156.358695652174	177.608695652174	196.478260869565	152.282608695652	139.152173913043	168.130434782609	176.54347826087	151.021739130435	211.467391304348	180.195652173913	136.576086956522	165.315217391304	200.673913043478	188.826086956522	112.282608695652	130.054347826087	227.934782608696	160.847826086957	147.097826086957	184.152173913043	206.95652173913	205.423913043478	145.5	150.04347826087	202.565217391304	210.978260869565	110.076086956522	171.348539130435	0.987939754804783
SYT12	237.673913043478	146.923913043478	152.304347826087	112.20652173913	163.445652173913	139.652173913043	157.086956521739	100.934782608696	138.391304347826	146.119565217391	164	140.282608695652	139.586956521739	135.913043478261	138.20652173913	127.586956521739	112.021739130435	161.869565217391	119.021739130435	114.282608695652	130.79347826087	162.217391304348	128.228260869565	117.478260869565	130.021739130435	118.45652173913	139.586956521739	116.347826086957	121.326086956522	130.5	130.021739130435	106.826086956522	119.945652173913	145.086956521739	170.54347826087	129.608695652174	117.521739130435	157.728260869565	121.760869565217	86.4239130434783	113.369565217391	115.510869565217	162.326086956522	115.967391304348	110.04347826087	128.75	134.215271956522	0.280674532404896
CIB2	335.358695652174	320.717391304348	255.554347826087	272.141304347826	335.173913043478	343.630434782609	289.369565217391	272.228260869565	354.369565217391	326.173913043478	239.130434782609	212.79347826087	384.597826086957	330.45652173913	337.847826086957	223.347826086957	373.717391304348	324.108695652174	329.086956521739	242.065217391304	355.097826086957	305.510869565217	299.489130434783	225.619565217391	280.228260869565	244.130434782609	201.065217391304	287.717391304348	283.891304347826	278.695652173913	371.108695652174	308.728260869565	331.260869565217	338.586956521739	382.934782608696	385.108695652174	259.652173913044	256.586956521739	400.565217391304	321.402173913044	315.086956521739	281.434782608696	369.304347826087	242.141304347826	197.576086956522	285.70652173913	302.40217826087	0.951928107777812
PER3	157.402173913044	148.619565217391	107.869565217391	200.945652173913	151.782608695652	118.141304347826	116.717391304348	213.826086956522	139.891304347826	160.326086956522	169.652173913043	179.728260869565	101.891304347826	124.565217391304	146.869565217391	152.195652173913	118.826086956522	113.945652173913	158	165.641304347826	132.815217391304	129.130434782609	155.445652173913	168.413043478261	135.891304347826	186.108695652174	181.04347826087	134.891304347826	133.45652173913	167.739130434783	115.869565217391	140.391304347826	139.467391304348	228.032608695652	138.554347826087	121.945652173913	120.326086956522	236.782608695652	170.739130434783	117.391304347826	127.79347826087	203.978260869565	172.869565217391	131.282608695652	163.04347826087	192.076086956522	152.006860869565	0.695155816342447
GMDS	143.065217391304	176.815217391304	154.913043478261	125.380434782609	151.782608695652	141.478260869565	168.967391304348	122.891304347826	145.70652173913	172.282608695652	157.282608695652	141.326086956522	154.336956521739	187.347826086957	195.45652173913	119.217391304348	161.391304347826	164.130434782609	169.336956521739	123.695652173913	162.586956521739	153.923913043478	165.445652173913	152.021739130435	139.282608695652	176.54347826087	127.04347826087	144.663043478261	137.45652173913	147.913043478261	145.521739130435	156.358695652174	166.130434782609	120.20652173913	171.891304347826	166.70652173913	165.989130434783	117.184782608696	157.369565217391	157.25	174.847826086957	143.45652173913	199.945652173913	169.967391304348	174.521739130435	164	155.1094	0.41262978248215
FTH1P10	946.119565217391	343.29347826087	632.152173913044	156.217391304348	521.923913043478	315.402173913044	429.75	105.347826086957	198.108695652174	360.108695652174	246.086956521739	137.434782608696	251.782608695652	257.608695652174	125.597826086957	128.304347826087	283.521739130435	271.70652173913	243.358695652174	114.282608695652	296.608695652174	353.29347826087	278.130434782609	157.782608695652	499.54347826087	308.608695652174	111.195652173913	519.586956521739	397.804347826087	415.815217391304	404.086956521739	538.728260869565	549.706521739131	131.673913043478	337.119565217391	356	194.010869565217	232.576086956522	359.652173913044	289.510869565217	300.04347826087	181.54347826087	243.195652173913	398.45652173913	656.739130434783	285.70652173913	323.157141304348	0.872319697382226
NTMT1	332.880434782609	300.04347826087	319.380434782609	229.652173913044	322.304347826087	250.29347826087	343.413043478261	241.413043478261	266.434782608696	280.152173913044	292.228260869565	256.717391304348	306.695652173913	369.717391304348	342.054347826087	226.239130434783	248.304347826087	330.95652173913	347.315217391304	197.347826086957	311.184782608696	246.086956521739	247.739130434783	187.467391304348	212.108695652174	270.630434782609	194.478260869565	274.739130434783	226.402173913044	206.608695652174	256.434782608696	221.489130434783	236.304347826087	172.434782608696	270.967391304348	305.608695652174	221.934782608696	213.826086956522	306.195652173913	278.423913043478	294.021739130435	189.913043478261	333.489130434783	233.630434782609	206.804347826087	168.576086956522	262.848765217391	0.280674532404896
VKORC1	196.282608695652	189.619565217391	170.565217391304	171.29347826087	188.913043478261	159.945652173913	127.717391304348	165.445652173913	224.054347826087	128.369565217391	217.184782608696	269.510869565217	181.902173913044	177.021739130435	163.130434782609	234.891304347826	180.45652173913	157.282608695652	174.739130434783	254.978260869565	204.271739130435	175.29347826087	184.152173913043	256.141304347826	176.869565217391	189.826086956522	209.239130434783	220.260869565217	230.695652173913	192.630434782609	175.75	172.282608695652	167.630434782609	191.695652173913	177.978260869565	209.782608695652	188.782608695652	153.630434782609	155.934782608696	137.065217391304	183.54347826087	158.423913043478	144.978260869565	198.826086956522	185.597826086957	189.260869565217	186.170608695652	0.6355310456915
SYNGR3	101.989130434783	136.152173913043	92.4347826086957	93.5217391304348	93.8586956521739	95.5108695652174	112.684782608696	107.565217391304	117.70652173913	102.445652173913	78.054347826087	81.1304347826087	81.3260869565217	102.076086956522	115.184782608696	86.5217391304348	107.489130434783	87	75.0434782608696	69.7717391304348	112.358695652174	98.2391304347826	102.152173913044	76.804347826087	102.195652173913	109.391304347826	87.8260869565217	105.260869565217	72.5	103.108695652174	92.0434782608696	106.826086956522	113.75	124.913043478261	104.869565217391	109.152173913043	128.217391304348	124.565217391304	88.1304347826087	105.54347826087	116.967391304348	93.304347826087	99.3478260869565	137.45652173913	119.195652173913	109.152173913043	101.755203913043	0.280977609908587
RRAS	290.086956521739	216.45652173913	265.380434782609	171.934782608696	312.130434782609	252.934782608696	249.391304347826	184.097826086957	260.29347826087	215.20652173913	226.130434782609	204.576086956522	357.804347826087	282.782608695652	230.282608695652	264.663043478261	274.652173913044	272.815217391304	237.434782608696	212.108695652174	289.032608695652	233.630434782609	253.086956521739	209.717391304348	245.684782608696	231.728260869565	237	289.630434782609	236.782608695652	179.130434782609	314.597826086957	271.608695652174	272.978260869565	188.315217391304	295.978260869565	408.695652173913	282.597826086957	169.021739130435	298.934782608696	307.021739130435	347.913043478261	203.032608695652	317.652173913044	267.815217391304	298.130434782609	186.608695652174	256.901932608696	0.361237401146808
ZNF202	323.913043478261	403.913043478261	353.728260869565	388.173913043478	363.760869565217	371.652173913044	334.152173913044	334.413043478261	307.586956521739	375.717391304348	401.195652173913	326.630434782609	355.891304347826	360.326086956522	334.369565217391	317.478260869565	287.119565217391	345.29347826087	356.141304347826	345.869565217391	371.913043478261	375.978260869565	370.54347826087	284.630434782609	335.5	379.75	367.239130434783	333.934782608696	333.434782608696	378.608695652174	405.217391304348	384.923913043478	313.130434782609	351.086956521739	350.239130434783	373.434782608696	350.173913043478	352.869565217391	324.04347826087	334.152173913044	302.717391304348	351.869565217391	350	412.304347826087	324.847826086957	327.217391304348	350.588852173913	0.854761287454209
TMEM39B	199.70652173913	200.260869565217	183.608695652174	178.108695652174	198.282608695652	191.380434782609	188.195652173913	200.782608695652	202.630434782609	196.021739130435	200.717391304348	169.586956521739	186.673913043478	231.652173913044	238.413043478261	195.195652173913	231.586956521739	220.847826086957	262.673913043478	166.782608695652	198.304347826087	194.478260869565	187.836956521739	143.489130434783	185.597826086957	222.217391304348	177.608695652174	181.086956521739	243.304347826087	192.630434782609	167.79347826087	197.869565217391	183.108695652174	161.695652173913	188.782608695652	206.95652173913	204.880434782609	170.119565217391	207.75	219.478260869565	213.130434782609	164.086956521739	203.347826086957	160.45652173913	165.521739130435	153.086956521739	194.298441304348	0.41262978248215
ZNF362	250.434782608696	249.065217391304	244.641304347826	237.565217391304	263.978260869565	229.554347826087	220.521739130435	250.369565217391	199.29347826087	231.728260869565	265.217391304348	202.217391304348	179.315217391304	218	190.304347826087	241.565217391304	215.565217391304	194.260869565217	210.576086956522	228.032608695652	196.326086956522	232.326086956522	197.576086956522	214.45652173913	257.869565217391	237.5	229.630434782609	234.108695652174	213.782608695652	251.565217391304	177.086956521739	232.25	242	194.663043478261	174.434782608696	215.5	186.304347826087	198.869565217391	225.913043478261	199.945652173913	201.369565217391	235.032608695652	153.119565217391	251.673913043478	201.521739130435	219.586956521739	219.491730434783	0.280674532404896
ZNF37BP	272.521739130435	275.445652173913	343.630434782609	334.130434782609	367.684782608696	337.5	310.326086956522	324.434782608696	225.45652173913	350	291.173913043478	278.630434782609	210.913043478261	258.891304347826	215.565217391304	288	223.239130434783	275.717391304348	296.934782608696	351.826086956522	220.815217391304	316.282608695652	254.260869565217	295.913043478261	326.54347826087	222.217391304348	308.20652173913	273.978260869565	275.445652173913	286.173913043478	286.739130434783	305.195652173913	252.804347826087	322.641304347826	230.326086956522	274.913043478261	295.815217391304	365.45652173913	227.869565217391	240.619565217391	232.576086956522	276.141304347826	253.945652173913	330	314.163043478261	293.021739130435	285.088843478261	0.593754333164763
AC074143.1	205.086956521739	196.847826086957	217.076086956522	129.771739130435	235.304347826087	222.086956521739	230.913043478261	126.804347826087	468.304347826087	306.826086956522	221.434782608696	165.086956521739	435.978260869565	449.739130434783	424.880434782609	241.565217391304	459.532608695652	539.630434782609	385.695652173913	261.521739130435	445.608695652174	516.413043478261	399.347826086957	326.717391304348	486.304347826087	436.576086956522	289.608695652174	451.326086956522	368.576086956522	352.130434782609	441.510869565217	387.608695652174	425.847826086957	196.847826086957	382.934782608696	407.021739130435	369.45652173913	164.847826086957	418.804347826087	351	368.478260869565	277.239130434783	366.032608695652	315.260869565217	327.217391304348	253.565217391304	335.877591304348	0.35583317303918
ATXN1	334.260869565217	379.065217391304	443.630434782609	444.826086956522	510.402173913044	457.130434782609	330.608695652174	454.586956521739	188.554347826087	413.304347826087	420.369565217391	495.510869565217	162.217391304348	387.45652173913	400.565217391304	485.5	226.739130434783	350.826086956522	422.141304347826	460.108695652174	260.04347826087	342.347826086957	305.510869565217	335.108695652174	286.065217391304	266.608695652174	295.326086956522	239.260869565217	200.260869565217	295.228260869565	232.086956521739	277.413043478261	270.217391304348	378.347826086957	239.79347826087	287.45652173913	274.173913043478	479.695652173913	396.5	407.021739130435	320.369565217391	391.097826086957	305.869565217391	384.95652173913	360.608695652174	361.391304347826	346.968810869565	0.361237401146808
POC5	255.684782608696	238.5	244.641304347826	358.20652173913	285.358695652174	283.45652173913	251.728260869565	372.021739130435	285.108695652174	274.228260869565	372.326086956522	414.260869565217	250.978260869565	223.630434782609	304.673913043478	365.130434782609	342.380434782609	217.021739130435	335.25	380.20652173913	298.934782608696	269.586956521739	285.597826086957	405.739130434783	303.086956521739	261.152173913044	432.521739130435	264.532608695652	329.434782608696	379.804347826087	249.141304347826	270.695652173913	249.065217391304	296.04347826087	235.445652173913	220	227.608695652174	345.467391304348	254.836956521739	242.141304347826	197.239130434783	366.108695652174	206.608695652174	278.597826086957	257.717391304348	348.684782608696	294.143195652174	0.411178312138894
AKR7A2	259.391304347826	326.728260869565	253.391304347826	159.032608695652	261.586956521739	266.326086956522	260.152173913044	190.304347826087	334.413043478261	288.652173913044	243.195652173913	206.608695652174	365.304347826087	332.586956521739	292.5	232.217391304348	289.391304347826	341.45652173913	284.347826086957	213.858695652174	317.478260869565	302.836956521739	247.739130434783	200.260869565217	261.521739130435	300.097826086957	205.54347826087	296.728260869565	206.521739130435	182.065217391304	287.652173913044	264.771739130435	281.760869565217	193.586956521739	294.282608695652	438.032608695652	315.260869565217	201.315217391304	284.195652173913	275.804347826087	334.565217391304	157.282608695652	366.032608695652	240.152173913044	230.847826086957	183.891304347826	266.77552173913	0.974650401680012
PLCB1	122.326086956522	140.815217391304	129.847826086957	118.152173913044	103.260869565217	135.467391304348	128.95652173913	114.869565217391	103.04347826087	118.173913043478	102.54347826087	138.5	76.7717391304348	96.2608695652174	136.076086956522	113.326086956522	102.869565217391	99.1304347826087	142.804347826087	110.608695652174	92.0652173913044	109.391304347826	155.445652173913	134.826086956522	105.923913043478	121.728260869565	95.6086956521739	78.2391304347826	115.54347826087	170.782608695652	113.391304347826	136.304347826087	136.869565217391	126.184782608696	119.826086956522	69.9347826086957	139.521739130435	114.826086956522	98.5217391304348	105.54347826087	123.086956521739	149.619565217391	104.739130434783	97.2826086956522	117.95652173913	105.847826086957	116.800335217391	0.769221335396275
RABEP2	197.304347826087	133.847826086957	131.130434782609	116.630434782609	117.782608695652	137.5	170.782608695652	121.326086956522	178.065217391304	129.478260869565	164	131.086956521739	168.413043478261	154.717391304348	151.369565217391	133.173913043478	134.869565217391	161.869565217391	152.195652173913	106.913043478261	151.847826086957	152.673913043478	123.586956521739	106.967391304348	128.032608695652	134.608695652174	112.163043478261	150.152173913043	118.739130434783	110.402173913043	148.467391304348	119.728260869565	118.260869565217	101.95652173913	162.119565217391	146.978260869565	100.804347826087	97.1956521739131	112.20652173913	134.5	165.45652173913	110.25	136.04347826087	131.282608695652	103.347826086957	117.804347826087	134.52244673913	0.280674532404896
GPX3	438.086956521739	387.913043478261	360.326086956522	329.04347826087	361.826086956522	319.119565217391	379.065217391304	322.065217391304	396.445652173913	373.434782608696	402.717391304348	387.913043478261	417.913043478261	290.141304347826	369.173913043478	362.260869565217	341.380434782609	348.184782608696	380.20652173913	314.358695652174	419.086956521739	333.097826086957	440	330.902173913044	269.847826086957	379.75	295.326086956522	335.673913043478	329.434782608696	324.076086956522	393.45652173913	335.54347826087	442.978260869565	331.717391304348	522.065217391304	357.065217391304	397.260869565217	343.891304347826	350.913043478261	270.29347826087	369.978260869565	308.728260869565	375.630434782609	384.141304347826	370.54347826087	359.260869565217	362.005202173913	0.891987221425214
HARBI1	106.684782608696	118.369565217391	107.869565217391	128.336956521739	105.782608695652	108.380434782609	116.717391304348	138.336956521739	141.413043478261	149.630434782609	84.9891304347826	107.489130434783	126.804347826087	142.5	174.021739130435	115.847826086957	132.304347826087	144.20652173913	169.336956521739	108.086956521739	111.304347826087	150.652173913043	141.608695652174	110.130434782609	125.782608695652	161.413043478261	108.130434782609	138.5	133.45652173913	115.369565217391	126.804347826087	141.891304347826	120.978260869565	142.195652173913	131.304347826087	137.434782608696	173.826086956522	143.576086956522	115.717391304348	132.380434782609	147.782608695652	161.315217391304	134.79347826087	168.934782608696	128.978260869565	132.652173913043	131.826557173913	0.280674532404896
DNAJC27	181.652173913043	238.5	195.54347826087	292.195652173913	199.847826086957	186.391304347826	184.891304347826	295.565217391304	257.184782608696	248.641304347826	263.152173913044	261.086956521739	279.826086956522	223.630434782609	246.804347826087	249.282608695652	235.891304347826	188.315217391304	213.402173913044	271.076086956522	196.326086956522	256.141304347826	310.184782608696	259.652173913044	245.684782608696	228.510869565217	293.152173913044	255.369565217391	243.304347826087	300.836956521739	188.521739130435	250.434782608696	195.054347826087	269.847826086957	184.152173913043	167.782608695652	214.54347826087	281.434782608696	197.304347826087	259.326086956522	222.760869565217	274.076086956522	195.717391304348	238.869565217391	260.239130434783	264.217391304348	238.398397826087	0.961997517770803
TBXAS1	130.217391304348	156.804347826087	140.815217391304	110.184782608696	110.945652173913	121.347826086957	158.521739130435	111.934782608696	128.304347826087	173.45652173913	168.576086956522	141.326086956522	117.95652173913	163.217391304348	152.608695652174	126.869565217391	113.239130434783	125.260869565217	175.934782608696	105.826086956522	134.239130434783	163.391304347826	179.782608695652	134.826086956522	117.5	134.608695652174	132.130434782609	125.304347826087	133.45652173913	130.5	117.054347826087	149.804347826087	141.891304347826	128.391304347826	160.021739130435	118.173913043478	143.271739130435	107.29347826087	113.434782608696	129.423913043478	139.04347826087	115.510869565217	108.260869565217	147.79347826087	140.597826086957	118.565217391304	134.730854347826	0.498531831848179
GMEB2	191.978260869565	200.260869565217	202.5	240.413043478261	219.586956521739	166.934782608696	222.445652173913	228.391304347826	208.304347826087	189.869565217391	207.75	250.586956521739	175.119565217391	188.586956521739	167.54347826087	190.391304347826	161.391304347826	200.782608695652	180.391304347826	171.695652173913	168.239130434783	185.978260869565	196.304347826087	222.532608695652	147.097826086957	226.608695652174	218.652173913043	157.282608695652	172.086956521739	202.804347826087	154.260869565217	170.630434782609	169.75	174.673913043478	144.260869565217	177.217391304348	160.847826086957	229.239130434783	172.934782608696	206.95652173913	207.945652173913	219.673913043478	213.782608695652	165.402173913044	178.913043478261	179.619565217391	191.056952173913	0.315037286245709
NEURL1B	159.586956521739	179.45652173913	219.630434782609	216.521739130435	203.217391304348	191.380434782609	197.782608695652	197.826086956522	470.75	180.369565217391	156.097826086957	163.217391304348	474.804347826087	295.326086956522	323.54347826087	313.434782608696	564.489130434783	501.163043478261	417.173913043478	479.771739130435	416.608695652174	553.521739130435	554.141304347826	595.913043478261	586.173913043478	510.402173913044	568.369565217391	465.673913043478	460.760869565217	442.978260869565	344.608695652174	407.565217391304	446.565217391304	210.826086956522	296.891304347826	311.717391304348	340.95652173913	207.054347826087	262.45652173913	270.29347826087	256.717391304348	309.717391304348	198.826086956522	200.239130434783	233.423913043478	220.326086956522	338.658076086957	0.987939754804783
Z68871.1	97.304347826087	115.260869565217	150.152173913043	182.130434782609	167.260869565217	119.119565217391	113.271739130435	173.934782608696	117.70652173913	147.260869565217	122.217391304348	125.782608695652	90.6739130434783	119.021739130435	136.076086956522	150.152173913043	123.489130434783	104.217391304348	179.20652173913	143.521739130435	90.8695652173913	148.326086956522	104.847826086957	116.369565217391	124.521739130435	141.673913043478	133.45652173913	97.3478260869565	95.7826086956522	137.478260869565	110.934782608696	117.79347826087	108.608695652174	172.434782608696	113.086956521739	88.2391304347826	147.032608695652	190.826086956522	106.782608695652	98.2391304347826	92.3260869565217	173.195652173913	89.7608695652174	100.804347826087	124.695652173913	168.576086956522	127.647215	0.581221643480379
NPHP3	157.402173913044	163.130434782609	175.260869565217	270.565217391304	186.891304347826	180.836956521739	150.717391304348	224	248.152173913044	205.54347826087	205.804347826087	254.804347826087	210.913043478261	234.739130434783	242.826086956522	257	266.739130434783	245.260869565217	286.119565217391	287.010869565217	210.391304347826	256.141304347826	240.978260869565	262.380434782609	241.717391304348	239.586956521739	297.5	194.010869565217	277.380434782609	273.652173913044	211.521739130435	221.489130434783	211.467391304348	277.891304347826	185.347826086957	144.739130434783	231.065217391304	288.25	212.239130434783	241.315217391304	190.521739130435	282.086956521739	229.173913043478	203.478260869565	221.065217391304	264.217391304348	229.63752173913	0.612799110448336
ZNF213	154.347826086957	172.608695652174	172.434782608696	115.652173913043	146.869565217391	169.097826086957	181.239130434783	123.630434782609	141.413043478261	148.173913043478	164	167.358695652174	142.576086956522	148.95652173913	143.630434782609	144.152173913043	148.380434782609	127.565217391304	128.119565217391	130.586956521739	128.717391304348	157.891304347826	148.913043478261	153.065217391304	156.54347826087	161.413043478261	135.630434782609	165.260869565217	167.20652173913	130.5	190.967391304348	171.402173913044	171.934782608696	124.913043478261	149.673913043478	166.70652173913	153.652173913043	116	155.934782608696	151.391304347826	149.119565217391	140.282608695652	176.630434782609	168.934782608696	148.130434782609	136.489130434783	151.0456	0.811512901305785
RWDD2A	91.2826086956522	83.3478260869565	84.6521739130435	99.1413043478261	109.304347826087	98.9347826086957	83.8152173913043	86.804347826087	86.1521739130435	92.8478260869565	107.402173913043	112.163043478261	90.6739130434783	96.2608695652174	81.5217391304348	125.326086956522	101.076086956522	98.0869565217391	89.5869565217391	132.369565217391	81.5869565217391	93.5869565217391	103.891304347826	145.70652173913	126.826086956522	98.8260869565217	152.021739130435	110.184782608696	94.1956521739131	129.663043478261	101.021739130435	124.695652173913	93.6304347826087	77.054347826087	107.54347826087	103.782608695652	98.2608695652174	103.173913043478	119.119565217391	84.0434782608696	103.04347826087	102.934782608696	94.5869565217391	121.847826086957	84.7608695652174	102.858695652174	102.382561304348	0.626659302806676
SGSM3	340.913043478261	325.326086956522	281.760869565217	268.673913043478	275.260869565217	322.934782608696	341.5	267.260869565217	357.619565217391	329.467391304348	310.271739130435	285.597826086957	317.54347826087	341.5	330.902173913044	270.967391304348	256.532608695652	387.79347826087	263.739130434783	217.739130434783	295.478260869565	326.423913043478	271.402173913044	265.304347826087	284.282608695652	268.902173913044	250.913043478261	340.586956521739	329.434782608696	263.467391304348	302.717391304348	314.869565217391	288.108695652174	283.79347826087	350.239130434783	342.413043478261	307.95652173913	274.54347826087	266.434782608696	297.260869565217	301.130434782609	214.673913043478	295.228260869565	298.5	275.5	252.391304347826	296.8535	0.41262978248215
MTND4P12	213.739130434783	157.891304347826	280.54347826087	72.6739130434783	97.7391304347826	135.467391304348	144.467391304348	57.1739130434783	164.130434782609	132.402173913044	106.152173913043	83.0652173913044	122.434782608696	129.934782608696	129.282608695652	128.304347826087	106.565217391304	148.739130434783	102.826086956522	105.826086956522	112.358695652174	180.29347826087	133	89.3260869565217	171.29347826087	130.891304347826	76.7173913043478	195.217391304348	159.521739130435	145.260869565217	184.641304347826	207.478260869565	183.108695652174	83.2391304347826	153.04347826087	200.760869565217	171.54347826087	94.9130434782609	147.782608695652	157.25	200.130434782609	56.5217391304348	145.978260869565	180.29347826087	271.804347826087	81.1956521739131	142.020087173913	0.467615375070118
ZNF14	122.326086956522	126.086956521739	103.836956521739	120.586956521739	119.326086956522	145.086956521739	117.652173913043	99.1521739130435	116.130434782609	110.663043478261	93.6739130434783	159.586956521739	108.760869565217	92.7391304347826	106.086956521739	147.032608695652	133.95652173913	93.4782608695652	91.6195652173913	117.826086956522	101.95652173913	109.391304347826	115.510869565217	131.913043478261	114.478260869565	119.945652173913	128.336956521739	103.717391304348	129.869565217391	153.347826086957	127.826086956522	144.20652173913	137.663043478261	135.565217391304	118.869565217391	107.978260869565	148.217391304348	156.891304347826	123.152173913043	116.032608695652	102.130434782609	139.25	101.04347826087	121.847826086957	104.608695652174	146.565217391304	120.998353043478	0.593754333164763
DHRS11	83.3695652173913	100.989130434783	116.304347826087	127.923913043478	72.9782608695652	112.5	85.1086956521739	129.663043478261	86.1521739130435	89.9673913043478	99.1413043478261	106.315217391304	74.7608695652174	110.95652173913	81.5217391304348	134.130434782609	94	101.45652173913	130.891304347826	117.826086956522	94.4673913043478	81.8478260869565	97.9782608695652	106.967391304348	122.70652173913	93.2173913043478	111.195652173913	89.4565217391305	94.1956521739131	106.554347826087	82	97.2391304347826	84.3478260869565	106.315217391304	83.5869565217391	98.9130434782609	112.413043478261	118.521739130435	69.3913043478261	117.391304347826	93.6086956521739	87.1304347826087	106.065217391304	77.8695652173913	113.239130434783	107.347826086957	100.21572826087	0.726050889871376
AP1M2	165.989130434783	164.086956521739	139.673913043478	162.652173913043	176.54347826087	147.978260869565	146.217391304348	202.673913043478	152.5	129.478260869565	190.108695652174	217.184782608696	157.282608695652	187.347826086957	219.315217391304	207.847826086957	163.79347826087	141.608695652174	163.869565217391	187.173913043478	155.521739130435	137.228260869565	171.402173913044	171.184782608696	149.782608695652	134.608695652174	151.021739130435	158.152173913043	180.195652173913	167.739130434783	138.413043478261	133.673913043478	126.869565217391	192.521739130435	157.326086956522	137.434782608696	139.521739130435	163.923913043478	186.217391304348	126.184782608696	166.826086956522	185.413043478261	167.923913043478	148.532608695652	155.282608695652	198.945652173913	163.590739130435	0.643440904227643
MAML2	219.228260869565	193.25	279.586956521739	244.923913043478	258.173913043478	236.173913043478	229.5	260.152173913044	323.5	226.739130434783	212.239130434783	298.652173913044	362.978260869565	260.347826086957	266.086956521739	382.282608695652	434.304347826087	410.652173913044	521.608695652174	633.239130434783	379.130434782609	410.065217391304	404.086956521739	516.782608695652	376.95652173913	397.260869565217	532.554347826087	328.413043478261	383.347826086957	461.826086956522	358.260869565217	320.021739130435	359.576086956522	356.04347826087	303.032608695652	286.119565217391	321	339.076086956522	357.065217391304	264.217391304348	312.336956521739	437.826086956522	267.45652173913	308.728260869565	403.054347826087	464.956521739131	345.713373913044	0.337416985809803
ZNF354A	175.586956521739	206.086956521739	142.010869565217	164.086956521739	170.478260869565	166.934782608696	139.891304347826	151	175.04347826087	171.29347826087	149.782608695652	206.608695652174	141.565217391304	104.152173913043	127.152173913044	221.326086956522	186.978260869565	144.20652173913	126.717391304348	228.032608695652	180.195652173913	164.576086956522	148.913043478261	224.54347826087	145.260869565217	178.195652173913	214.369565217391	146.25	154.065217391304	139.413043478261	182.065217391304	192.380434782609	147.032608695652	162.717391304348	170.54347826087	150.891304347826	168.521739130435	187.391304347826	172.934782608696	120.586956521739	134.195652173913	184.608695652174	144.978260869565	187.282608695652	171.54347826087	177.815217391304	166.308847826087	0.941322880173259
ZNRD2	160.586956521739	123.195652173913	132.336956521739	99.1413043478261	140.815217391304	108.380434782609	143.282608695652	89.7717391304348	165.695652173913	166.423913043478	100.065217391304	106.315217391304	157.282608695652	167.630434782609	122.260869565217	124.478260869565	138.369565217391	130.217391304348	89.5869565217391	91.9782608695652	198.304347826087	116.130434782609	114.445652173913	95.1630434782609	96.3913043478261	118.45652173913	99.4130434782609	119.326086956522	109.771739130435	118.673913043478	162.934782608696	114.141304347826	141.891304347826	97.6739130434783	169.336956521739	162.119565217391	141.652173913043	98.3478260869565	158.652173913043	138.869565217391	132.173913043478	111.630434782609	208.826086956522	112.304347826087	104.608695652174	112.510869565217	128.512290869565	0.800453726178888
PPP1R3E	173.847826086957	164.086956521739	206.108695652174	215.891304347826	162.119565217391	232.717391304348	169.913043478261	197.826086956522	185.717391304348	263.836956521739	275.630434782609	197.728260869565	170.54347826087	244.086956521739	212.826086956522	263.380434782609	214.728260869565	225.423913043478	206.695652173913	232.5	171.065217391304	259.597826086957	214.5	189.826086956522	242.695652173913	184	238.347826086957	224.934782608696	206.521739130435	252.565217391304	167.79347826087	210.978260869565	168.630434782609	211.945652173913	153.04347826087	194.663043478261	204.880434782609	212.739130434783	162.423913043478	287.586956521739	203.804347826087	130.358695652174	213.782608695652	257.913043478261	261.119565217391	156.423913043478	208.646741304348	0.961997517770803
SPTB	109.217391304348	81.5217391304348	60.9565217391304	73.4891304347826	86.804347826087	77.0434782608696	74.8695652173913	75.8260869565217	211.5	112.04347826087	106.152173913043	106.315217391304	290.739130434783	126.282608695652	129.282608695652	101.739130434783	146.04347826087	165.45652173913	130.891304347826	117.826086956522	148.565217391304	174.521739130435	152.282608695652	131.913043478261	163.978260869565	165.076086956522	145.260869565217	145.521739130435	144.369565217391	117.804347826087	145.521739130435	158.79347826087	139.467391304348	179.45652173913	300.097826086957	194.663043478261	102.45652173913	117.184782608696	121.760869565217	143.271739130435	118.195652173913	99.9565217391304	123.630434782609	99.4782608695652	89.1739130434783	172.282608695652	134.319229782609	0.465912595025846
ZXDC	320.847826086957	319.804347826087	346.04347826087	321.152173913044	349.891304347826	347.04347826087	279.326086956522	319.065217391304	414.934782608696	310.434782608696	301.065217391304	289.173913043478	352.804347826087	332.586956521739	350	302.804347826087	357.619565217391	294.597826086957	351.826086956522	348.684782608696	357.326086956522	398.739130434783	404.086956521739	291.086956521739	332.04347826087	430.45652173913	327.858695652174	359.869565217391	365.380434782609	364.815217391304	408.695652173913	356.423913043478	381.945652173913	365.652173913044	354.695652173913	421.163043478261	392.152173913044	347.315217391304	332.663043478261	365.913043478261	330.173913043478	328.130434782609	364.815217391304	293.782608695652	302.978260869565	357.478260869565	346.637997826087	0.454283449297857
AC004156.1	334.260869565217	337.902173913044	277.641304347826	301.260869565217	322.304347826087	255.086956521739	364.565217391304	282.880434782609	444.826086956522	280.152173913044	360.891304347826	337.5	477.304347826087	413.152173913044	476.717391304348	362.260869565217	380.684782608696	342.695652173913	462.086956521739	320.934782608696	427.630434782609	309.217391304348	415.152173913044	326.173913043478	307.347826086957	422.304347826087	296.652173913044	367.608695652174	426.391304347826	335.804347826087	342.673913043478	279.326086956522	279.913043478261	251.869565217391	321.630434782609	469.217391304348	254.869565217391	270.695652173913	347.152173913044	314.369565217391	321.5	204.695652173913	336.25	303.521739130435	237.391304347826	239.54347826087	337.913284782609	0.280674532404896
HSD17B7	272.521739130435	224.847826086957	197.869565217391	171.29347826087	201.04347826087	214.086956521739	185.782608695652	196.282608695652	205.282608695652	235.891304347826	167.358695652174	139.347826086957	185.413043478261	179.826086956522	143.630434782609	151.304347826087	150.04347826087	188.315217391304	126.717391304348	150.065217391304	179.021739130435	182	177.369565217391	133.608695652174	161.086956521739	128.717391304348	108.130434782609	164	155.923913043478	151.304347826087	199.804347826087	176.673913043478	153.173913043478	195.782608695652	236.5	227.010869565217	188.782608695652	200.065217391304	225.021739130435	171.695652173913	187.434782608696	190.934782608696	221.489130434783	228.586956521739	153.978260869565	247.565217391304	183.317104347826	0.660888234478112
DHRS4	104.630434782609	108.141304347826	95.3478260869565	83.0869565217391	97.7391304347826	98.9347826086957	126.891304347826	93.7173913043478	116.130434782609	106.652173913043	117.521739130435	115.369565217391	123.586956521739	135.913043478261	137.260869565217	98.1304347826087	117.717391304348	95.8586956521739	97.0434782608696	102.195652173913	117.75	112.630434782609	93.2391304347826	109.173913043478	90.2608695652174	82.7391304347826	108.130434782609	103.717391304348	102.826086956522	87.1521739130435	88.5760869565217	116	96	80.304347826087	83.5869565217391	127.826086956522	117.521739130435	108.152173913044	127.652173913043	145.347826086957	120.978260869565	93.304347826087	114.086956521739	120.934782608696	105.630434782609	98.6304347826087	107.04395173913	0.800453726178888
TDRKH	507.478260869565	476.445652173913	514.565217391304	488.45652173913	437.54347826087	432.967391304348	506.782608695652	519.739130434783	361.45652173913	442.326086956522	389.184782608696	470.826086956522	379.065217391304	489.326086956522	414.010869565217	403.054347826087	371.521739130435	377.097826086957	391.836956521739	366.173913043478	374.54347826087	379.75	376.847826086957	366.54347826087	342.695652173913	359.434782608696	353.5	362.195652173913	360.717391304348	349.608695652174	396	405.978260869565	462.586956521739	497.673913043478	431.326086956522	391.467391304348	411.75	501.478260869565	427.913043478261	417.304347826087	497.434782608696	443.565217391304	461.717391304348	407.565217391304	461	423.391304347826	421.822782608696	0.811244390018805
ZNF865	223.510869565217	203.032608695652	205.217391304348	181.086956521739	222.304347826087	206.804347826087	250.728260869565	161.369565217391	184.152173913043	205.54347826087	170.565217391304	203.978260869565	220.108695652174	224.413043478261	219.315217391304	191.489130434783	200.673913043478	231.95652173913	253.04347826087	191.869565217391	191.804347826087	215.065217391304	214.5	238.065217391304	211.141304347826	234.260869565217	207.478260869565	228.239130434783	195.20652173913	215.684782608696	217.673913043478	212.826086956522	220.902173913044	208.771739130435	268.630434782609	237.173913043478	184.021739130435	158.521739130435	219.858695652174	182.652173913043	190.521739130435	159.630434782609	218	198.826086956522	172.521739130435	202.173913043478	207.724239130435	0.744294424480949
ZNF761	269.673913043478	281.815217391304	332.586956521739	370.130434782609	322.304347826087	306.826086956522	281.913043478261	386.79347826087	286.434782608696	258.663043478261	310.271739130435	323.054347826087	254.054347826087	250.304347826087	251.565217391304	310.04347826087	285.260869565217	259.315217391304	278.130434782609	367.282608695652	238.130434782609	238	236.195652173913	328.54347826087	259.141304347826	275.065217391304	376.239130434783	267.391304347826	250.652173913044	253.586956521739	288.652173913044	296.239130434783	274.282608695652	343.021739130435	279.423913043478	240.826086956522	321	396.391304347826	280.782608695652	265.217391304348	261.119565217391	402.304347826087	291.152173913044	299.217391304348	307.641304347826	364.478260869565	296.111289130435	0.872319697382226
NNT-AS1	294.652173913044	265.739130434783	251.076086956522	313.391304347826	254.260869565217	341.760869565217	256.586956521739	320.130434782609	208.304347826087	245.391304347826	226.695652173913	330.95652173913	249.010869565217	195.641304347826	236.619565217391	270.967391304348	299.663043478261	225.423913043478	249.282608695652	291.086956521739	251.413043478261	256.141304347826	214.5	275.869565217391	265.434782608696	208.826086956522	273.521739130435	244.369565217391	285.934782608696	330.847826086957	282.510869565217	291.391304347826	329.141304347826	293.576086956522	230.326086956522	180.934782608696	272.673913043478	333.934782608696	217.021739130435	252.326086956522	262.902173913044	386.369565217391	210.576086956522	283.402173913044	350.652173913044	351.652173913044	270.932426086957	0.593754333164763
VPS33A	516.652173913044	589.869565217391	537.152173913044	617.717391304348	547.782608695652	569.347826086957	491.858695652174	627.173913043478	601.510869565217	513.434782608696	564.673913043478	635.739130434783	537.152173913044	567.706521739131	560.869565217391	617.380434782609	553.021739130435	501.163043478261	577.130434782609	613.630434782609	565.326086956522	548.804347826087	524.760869565217	628.717391304348	550.065217391304	650.173913043478	547.804347826087	528.434782608696	611.369565217391	545.326086956522	550.652173913044	528.826086956522	545.934782608696	630.413043478261	567.04347826087	515.673913043478	547.717391304348	620.913043478261	590.586956521739	611.369565217391	565.565217391304	689.086956521739	625.152173913044	560.304347826087	610.880434782609	696.565217391304	576.05292826087	0.280977609908587
MTMR3	655.369565217391	757.913043478261	794.717391304348	668.086956521739	768.782608695652	646.271739130435	681.456521739131	722.75	770.695652173913	846.673913043478	676.695652173913	714.065217391304	782.228260869565	824.369565217391	830.054347826087	659.728260869565	684.652173913044	759.108695652174	758.054347826087	629.913043478261	638.521739130435	741.380434782609	712.282608695652	648	701.978260869565	717.413043478261	622.239130434783	665.260869565217	655.913043478261	641.804347826087	721.695652173913	712.434782608696	683.467391304348	668.54347826087	749.521739130435	818.108695652174	793.206521739131	656.369565217391	603.402173913044	755.597826086957	775.152173913044	698.673913043478	702.673913043478	630.413043478261	772.456521739131	638.130434782609	712.091915217391	0.563639087549767
FBXO4	280.434782608696	342.347826086957	303.086956521739	377.195652173913	290.739130434783	405.04347826087	310.326086956522	355.195652173913	270.021739130435	370.065217391304	346.902173913044	375.260869565217	295.228260869565	302.836956521739	272.978260869565	412.45652173913	365.130434782609	317.130434782609	312.869565217391	368.195652173913	308.782608695652	370.891304347826	311.521739130435	372.076086956522	427.858695652174	363.010869565217	357.402173913044	344.021739130435	363.847826086957	421.717391304348	326	331.326086956522	344.95652173913	369.673913043478	298.20652173913	261.239130434783	379.641304347826	366.239130434783	325.402173913044	301.826086956522	333.489130434783	370.065217391304	332.445652173913	354.891304347826	338.54347826087	357.478260869565	341.434786956522	0.832910178327306
ZNF436	352.597826086957	348.239130434783	317.25	364.565217391304	329.782608695652	285.521739130435	316.695652173913	387.880434782609	368.423913043478	381.326086956522	412.45652173913	421.5	394.695652173913	355.923913043478	340.271739130435	414.010869565217	375.782608695652	410.652173913044	401.804347826087	453.021739130435	355.097826086957	396.95652173913	455.054347826087	425	372.184782608696	316.152173913044	442.54347826087	374.70652173913	409.358695652174	402.847826086957	339.902173913044	363.010869565217	285.108695652174	348.326086956522	377.29347826087	293.782608695652	305.086956521739	338.152173913044	341.5	304.673913043478	265.5	316.326086956522	314.369565217391	387.326086956522	315.141304347826	393.760869565217	362.425330434783	0.294636017734287
TGFB1I1	617.086956521739	554.869565217391	523.152173913044	408.065217391304	604.869565217391	496.391304347826	537.913043478261	403.391304347826	919.467391304348	524.5	447.217391304348	398.739130434783	803.217391304348	490.260869565217	457.847826086957	396.326086956522	566.978260869565	558.717391304348	451.228260869565	417.673913043478	644.521739130435	606.597826086957	482.673913043478	455.206521739131	582.510869565217	529.217391304348	469.04347826087	681.456521739131	484.597826086957	486.5	764.869565217391	548.934782608696	646.652173913044	486	786.086956521739	879.336956521739	656.891304347826	440.521739130435	705.054347826087	534.195652173913	597.086956521739	409.565217391304	731.152173913044	542.695652173913	609.282608695652	496.521739130435	561.632330434783	0.369822153350424
ARHGEF17	500	560.086956521739	610.804347826087	494.717391304348	619.413043478261	546.152173913044	592.065217391304	495.510869565217	724.021739130435	513.434782608696	487.358695652174	476.239130434783	652.913043478261	496.065217391304	488.04347826087	473.173913043478	576.836956521739	553.021739130435	447.913043478261	483.913043478261	519.478260869565	554.956521739131	511.173913043478	531.619565217391	617.086956521739	512.271739130435	547.804347826087	570.369565217391	567.706521739131	517.978260869565	533.347826086957	579	634.75	465.79347826087	575.891304347826	556.989130434783	638.130434782609	449.739130434783	578.141304347826	601.04347826087	658.739130434783	519.478260869565	610.434782608696	552.771739130435	560.673913043478	470.304347826087	548.420834782609	0.665263602826114
ATP5MF	288.195652173913	261.826086956522	259.45652173913	304.652173913044	244.086956521739	244.021739130435	261.75	337.25	261.673913043478	317.597826086957	333.097826086957	240.021739130435	322.869565217391	280.673913043478	242.826086956522	234.119565217391	269.978260869565	296.978260869565	200.804347826087	248.836956521739	302.836956521739	235.782608695652	324.717391304348	208.652173913044	259.141304347826	245.739130434783	256.141304347826	275.826086956522	279.913043478261	261.326086956522	252.010869565217	255.29347826087	277.239130434783	260.29347826087	265.434782608696	342.413043478261	297.04347826087	262.565217391304	316.836956521739	247.54347826087	247.79347826087	276.141304347826	281.521739130435	323.760869565217	318.217391304348	293.021739130435	274.302697826087	0.606744119727504
ASIC1	173.847826086957	203.032608695652	221.934782608696	209.173913043478	174.434782608696	175.45652173913	225.239130434783	231.847826086957	136.608695652174	192.739130434783	205.804347826087	187.326086956522	141.565217391304	184.608695652174	183.065217391304	223.347826086957	168.695652173913	192.54347826087	202.413043478261	226.869565217391	169.967391304348	204.326086956522	217.326086956522	184.923913043478	185.597826086957	148.217391304348	251.95652173913	223.510869565217	178.45652173913	174.673913043478	205.95652173913	201.782608695652	192.869565217391	200.217391304348	211.065217391304	213.54347826087	202.434782608696	182.826086956522	185.032608695652	198.869565217391	197.239130434783	205.70652173913	197.673913043478	176.217391304348	213.217391304348	192.076086956522	195.135630434783	0.857102617258646
TMEM38B	751.391304347826	616.086956521739	597.434782608696	951.804347826087	621.79347826087	611.195652173913	615.282608695652	1031.66304347826	549.706521739131	620.130434782609	742.217391304348	1006.69565217391	560.771739130435	502.565217391304	506.5	921.195652173913	689.434782608696	447.95652173913	524.695652173913	958.836956521739	623.945652173913	560	675.195652173913	1019.80434782609	594.554347826087	607.380434782609	968.478260869565	476.608695652174	705.706521739131	754.217391304348	594.304347826087	546.532608695652	558.217391304348	781.967391304348	540.597826086957	359.347826086957	499.728260869565	866.184782608696	493.565217391304	371.760869565217	455.967391304348	900.45652173913	425.760869565217	642.586956521739	650.434782608696	935.739130434783	661.660919565217	0.422345083074932
ZSCAN29	576.369565217391	702.586956521739	638.239130434783	668.54347826087	671.282608695652	708.04347826087	622.869565217391	692.336956521739	619.021739130435	664.130434782609	621.163043478261	645.706521739131	688.239130434783	589.282608695652	677.130434782609	684.413043478261	570.565217391304	741.282608695652	662.445652173913	621.673913043478	566.336956521739	672.489130434783	577.717391304348	662.445652173913	644.032608695652	549.152173913044	660.934782608696	601.510869565217	608.326086956522	672.739130434783	742.869565217391	611.195652173913	632.336956521739	702.586956521739	658.130434782609	650.945652173913	757.695652173913	655.239130434783	679.228260869565	765.413043478261	649.902173913044	657.532608695652	634.967391304348	604.5	710.021739130435	663.347826086957	653.411393478261	0.631642580640251
ELP6	300.260869565217	255.29347826087	223.836956521739	245.913043478261	304.489130434783	265.630434782609	243.271739130435	289.369565217391	295.326086956522	303.70652173913	283.79347826087	259.54347826087	246.869565217391	225.804347826087	288.152173913044	242.413043478261	219.858695652174	251.45652173913	293.065217391304	250.913043478261	288	249.086956521739	260.478260869565	216.717391304348	268.586956521739	268.902173913044	260.913043478261	261.45652173913	275.445652173913	243.804347826087	246.239130434783	257.652173913044	212.108695652174	228.032608695652	235.445652173913	293.782608695652	223.054347826087	200.065217391304	239.79347826087	245.173913043478	240.565217391304	245.913043478261	271.54347826087	232.217391304348	219.858695652174	270.913043478261	255.319941304348	0.280674532404896
WDR27	411.228260869565	469.934782608696	508.869565217391	522.282608695652	382.282608695652	534.847826086957	478.20652173913	487.891304347826	318.021739130435	446.413043478261	444.173913043478	392.608695652174	317.54347826087	411.652173913043	414.010869565217	401.652173913044	332.782608695652	470.173913043478	407.228260869565	419.021739130435	304.978260869565	435.20652173913	404.086956521739	357.25	418.434782608696	337.45652173913	390.630434782609	371.195652173913	391.673913043478	394.695652173913	421.434782608696	449.945652173913	350.086956521739	455.152173913044	335.423913043478	465.336956521739	466.163043478261	478.369565217391	355.630434782609	591.880434782609	444.586956521739	372.630434782609	431.25	504.967391304348	458.04347826087	370.760869565217	420.176045652174	0.989971725271259
HECA	158.652173913043	198.565217391304	163.130434782609	196.326086956522	165.021739130435	162.521739130435	195.717391304348	199.782608695652	156.217391304348	176.336956521739	177.5	234.608695652174	221.934782608696	228.391304347826	206.934782608696	213.478260869565	212.826086956522	194.260869565217	234.195652173913	215.815217391304	193.065217391304	198.782608695652	185.184782608696	214.45652173913	185.597826086957	167.108695652174	191	178.141304347826	162.934782608696	151.304347826087	174.336956521739	155.173913043478	208.586956521739	198.913043478261	205.95652173913	165.217391304348	176.673913043478	160.586956521739	162.423913043478	149.782608695652	207.945652173913	183.652173913043	194.130434782609	183.891304347826	207.978260869565	209.347826086957	188.791117391304	0.721296905913054
PPP1R3D	205.086956521739	226.021739130435	221.934782608696	227.978260869565	241.95652173913	255.086956521739	213.130434782609	239.086956521739	249.54347826087	274.228260869565	235.304347826087	233.217391304348	282.782608695652	260.347826086957	283.663043478261	239.630434782609	283.521739130435	269.260869565217	269.565217391304	322.586956521739	252.326086956522	353.29347826087	269.184782608696	323.20652173913	303.086956521739	280.380434782609	250.913043478261	275.826086956522	299.010869565217	343.173913043478	261.826086956522	228.239130434783	252.260869565217	245.5	215.326086956522	199.173913043478	249.478260869565	250.608695652174	269.108695652174	226.739130434783	216.152173913043	250.836956521739	176.630434782609	226.608695652174	251.04347826087	272.739130434783	256.013234782609	0.769193705142623
CDC34	322.25	298.54347826087	305.663043478261	209.695652173913	315.989130434783	304.782608695652	308.152173913044	204.04347826087	308.934782608696	251.630434782609	259.597826086957	279.826086956522	331.5	277.380434782609	291.336956521739	267.54347826087	281	302.358695652174	261.195652173913	200.260869565217	329.195652173913	243.989130434783	244.195652173913	243.065217391304	228.913043478261	286.065217391304	232.195652173913	251.673913043478	196.804347826087	180.065217391304	344.608695652174	273.521739130435	277.79347826087	242.826086956522	349.228260869565	334.891304347826	240.978260869565	210	260.29347826087	287.586956521739	269.760869565217	203.032608695652	280	272.347826086957	242.891304347826	255.804347826087	268.769852173913	0.585292872973451
CENPC	374.347826086957	444.173913043478	381.108695652174	492.913043478261	452	507.826086956522	369.173913043478	467.847826086957	414.934782608696	382.521739130435	360.891304347826	496.391304347826	461.771739130435	435.739130434783	497	610.880434782609	562.891304347826	476.478260869565	509.5	560.413043478261	454.510869565217	510.717391304348	463.260869565217	603.619565217391	543.913043478261	495.130434782609	536.891304347826	449.739130434783	514.478260869565	576.782608695652	382.021739130435	447.173913043478	428.934782608696	451.228260869565	323.108695652174	334.891304347826	433.282608695652	495.945652173913	366.239130434783	373.913043478261	396.608695652174	401.847826086957	311.978260869565	382.934782608696	403.054347826087	363.413043478261	450.096165217391	0.280674532404896
DHFR2	238.652173913043	227.130434782609	298.45652173913	376.239130434783	282.45652173913	302.021739130435	260.152173913044	351.228260869565	219.086956521739	290.326086956522	277.54347826087	332.695652173913	186.673913043478	310.684782608696	278.695652173913	324.652173913044	238.239130434783	211.282608695652	265.217391304348	265.380434782609	212.891304347826	221.326086956522	234.119565217391	288.586956521739	268.586956521739	203.347826086957	286.021739130435	235.869565217391	168.663043478261	230.847826086957	208.891304347826	299.315217391304	254.869565217391	319.586956521739	194.076086956522	171.184782608696	254.173913043478	379	278.565217391304	268.902173913044	324.04347826087	362.195652173913	271.54347826087	277.239130434783	266.086956521739	255.804347826087	266.794665217391	0.872319697382226
PIBF1	512.152173913044	595.913043478261	557.239130434783	577.010869565218	571.260869565217	578.217391304348	543.402173913044	639.717391304348	453.5	574.5	508.967391304348	585.065217391304	501.239130434783	483.978260869565	435.673913043478	542.79347826087	477.869565217391	478.445652173913	427.04347826087	510.565217391304	453.413043478261	493.5	483.978260869565	573.869565217391	450.75	465.5	483.673913043478	441.04347826087	509.5	492.978260869565	538.891304347826	434.673913043478	508.79347826087	616.641304347826	547.717391304348	421.163043478261	532.380434782609	680.630434782609	588.684782608696	457.478260869565	462.29347826087	639.326086956522	529.836956521739	619.413043478261	600.782608695652	697.576086956522	527.805297826087	0.593754333164763
NRSN2	436.79347826087	348.923913043478	329.467391304348	334.45652173913	362.728260869565	341.760869565217	391.673913043478	354.04347826087	460.586956521739	378.065217391304	449.945652173913	427.565217391304	415.304347826087	415.217391304348	420.369565217391	406.260869565217	372.282608695652	414.173913043478	384.021739130435	383.739130434783	368.978260869565	356.391304347826	413.54347826087	376.239130434783	422.239130434783	388.858695652174	424.152173913043	378.934782608696	391.673913043478	363.228260869565	378.608695652174	456.826086956522	394.695652173913	359.217391304348	476.54347826087	513.336956521739	383.79347826087	350.913043478261	424.152173913043	423.282608695652	459.880434782609	414.619565217391	521.728260869565	401.304347826087	378.065217391304	399.380434782609	401.042773913044	0.280674532404896
ZNF627	223.510869565217	295.326086956522	207.29347826087	274.978260869565	290.739130434783	296.891304347826	206.891304347826	283.847826086957	292.04347826087	254.45652173913	298.695652173913	340.95652173913	257.608695652174	309.347826086957	281.760869565217	381.108695652174	343.260869565217	298.04347826087	265.217391304348	364.565217391304	285.358695652174	306.695652173913	315.717391304348	363.576086956522	353.152173913044	305.326086956522	332.880434782609	302.760869565217	315.597826086957	375.630434782609	282.510869565217	281.869565217391	265.217391304348	254.728260869565	263.086956521739	265.79347826087	280.891304347826	280.282608695652	306.195652173913	290.565217391304	266.478260869565	328.130434782609	289.739130434783	311.184782608696	225.5	277.29347826087	293.319715217391	0.971098537277846
SNORD17	450.75	480.489130434783	444.532608695652	424.369565217391	501.391304347826	452.934782608696	491.858695652174	385.565217391304	780	510.565217391304	324.847826086957	443.282608695652	872.065217391304	595.152173913044	493.913043478261	426.576086956522	871.95652173913	603.836956521739	331.934782608696	347.152173913044	588.586956521739	535.336956521739	543.739130434783	357.25	472.576086956522	566.184782608696	188.891304347826	458	499.54347826087	384.847826086957	505.586956521739	432.521739130435	485.673913043478	515.815217391304	499.586956521739	704.95652173913	769.391304347826	451.228260869565	594.478260869565	337.173913043478	442.054347826087	325.782608695652	463.260869565217	437.597826086957	281.869565217391	428.619565217391	489.211486956522	0.64813788935475
ZNF287	378	396.130434782609	336.836956521739	397.065217391304	372.130434782609	371.652173913044	348.586956521739	435.739130434783	248.152173913044	360.108695652174	323.20652173913	372.445652173913	297.260869565217	307.880434782609	271.739130434783	364.173913043478	309.565217391304	296.978260869565	289.173913043478	362.413043478261	363.934782608696	310.271739130435	292.108695652174	296.728260869565	351.086956521739	306.891304347826	348.054347826087	253.565217391304	293.782608695652	314.75	300.152173913044	356.423913043478	327.510869565217	426.434782608696	311.521739130435	245.173913043478	326.630434782609	437.826086956522	331.217391304348	311.184782608696	369.978260869565	408.369565217391	322.967391304348	362.29347826087	315.141304347826	370.760869565217	336.826089130435	0.872319697382226
MORN2	334.260869565217	316.782608695652	279.586956521739	280.891304347826	411.652173913043	351.978260869565	296.173913043478	282	334.413043478261	420.402173913044	321.152173913044	253.565217391304	273.228260869565	363.521739130435	246.804347826087	220.184782608696	304.652173913044	274.228260869565	231.739130434783	239.54347826087	379.130434782609	258.945652173913	264.326086956522	245	254.554347826087	316.152173913044	223.347826086957	285.978260869565	293.782608695652	262.902173913044	316.282608695652	217.717391304348	283.95652173913	276.29347826087	280.695652173913	302.108695652174	236.195652173913	272.565217391304	290.478260869565	237	198.380434782609	291.54347826087	299.04347826087	340.086956521739	270.521739130435	294.369565217391	287.567823913043	0.33408332625636
UBALD1	251.413043478261	182.891304347826	234.195652173913	151.021739130435	196.380434782609	156.847826086957	236.130434782609	139.217391304348	248.152173913044	173.45652173913	161.934782608696	130.29347826087	234.163043478261	295.326086956522	187.260869565217	141.391304347826	201.826086956522	204.217391304348	204.108695652174	150.771739130435	217.739130434783	210.217391304348	186.032608695652	160.336956521739	243.771739130435	195.369565217391	148.673913043478	233.086956521739	172.086956521739	206.608695652174	221.934782608696	228.934782608696	253.815217391304	132.45652173913	192.782608695652	274.913043478261	190.902173913044	123.586956521739	212.239130434783	202.565217391304	232.576086956522	150.858695652174	238.5	182.336956521739	203.891304347826	122.326086956522	196.077032608696	0.961137282092571
LINC-PINT	328.239130434783	360.282608695652	308.108695652174	233.217391304348	246.869565217391	281.239130434783	268.608695652174	210.978260869565	256.141304347826	360.108695652174	325.913043478261	327.978260869565	299.04347826087	212.173913043478	236.619565217391	287.065217391304	219.858695652174	287.869565217391	254.45652173913	298.891304347826	303.826086956522	331.173913043478	244.195652173913	298.815217391304	287.847826086957	208.826086956522	242.521739130435	292.228260869565	234.891304347826	262.021739130435	234.391304347826	213.858695652174	171.184782608696	280.228260869565	381.108695652174	209.782608695652	248.717391304348	241.217391304348	178.021739130435	204.184782608696	178.217391304348	192.760869565217	178.217391304348	294.760869565217	323.684782608696	316.521739130435	264.279776086957	0.280674532404896
NOSIP	427.913043478261	382.086956521739	386.423913043478	301.260869565217	385.163043478261	353.608695652174	443.760869565217	252.45652173913	455.5	406.891304347826	359.065217391304	350	472.04347826087	556.108695652174	483.260869565217	354.04347826087	373.04347826087	506.5	427.04347826087	318.467391304348	458.380434782609	447.173913043478	362.260869565217	343.847826086957	366.108695652174	401.847826086957	317.25	389.184782608696	315.597826086957	305.760869565217	426.434782608696	364.315217391304	384.021739130435	318.586956521739	471.29347826087	526.141304347826	364.065217391304	254.728260869565	505.586956521739	507.141304347826	519.815217391304	276.141304347826	591.978260869565	375.065217391304	322.5	343.086956521739	396.803406521739	0.744294424480949
FAM3C	442.826086956522	435.076086956522	430.717391304348	508.586956521739	520.108695652174	485.304347826087	413.630434782609	581.586956521739	441.608695652174	498.826086956522	576.782608695652	633.804347826087	398.652173913044	338.434782608696	408.369565217391	603.402173913044	469.380434782609	431.086956521739	387.532608695652	696.695652173913	531.619565217391	379.75	501.554347826087	691.45652173913	485.304347826087	533.586956521739	690.108695652174	431.673913043478	499.54347826087	559.521739130435	487.5	428.804347826087	414.478260869565	496.717391304348	413.630434782609	334.260869565217	386.54347826087	514.95652173913	379.695652173913	246.804347826087	372.076086956522	565.913043478261	267.45652173913	413.152173913044	395.108695652174	497.369565217391	470.021741304348	0.280674532404896
YIPF1	413.304347826087	397.336956521739	407.021739130435	408.065217391304	384.021739130435	452	435.20652173913	456.869565217391	371.369565217391	426.434782608696	416.934782608696	449.739130434783	381.032608695652	333.771739130435	391.04347826087	398.945652173913	391.521739130435	319.630434782609	336.25	412.771739130435	375.369565217391	410.065217391304	441.195652173913	463.95652173913	376.021739130435	442.108695652174	408.391304347826	361.304347826087	416.010869565217	381.369565217391	418.434782608696	410.978260869565	419.260869565217	468.119565217391	486.065217391304	392.521739130435	456.869565217391	441.510869565217	453.021739130435	353.5	384.402173913044	434.097826086957	380.391304347826	477.630434782609	466.804347826087	480.847826086957	412.685252173913	0.308617984401933
C1orf74	218.086956521739	191.630434782609	175.260869565217	199.413043478261	196.380434782609	210.097826086957	174.434782608696	211.945652173913	188.554347826087	198.04347826087	200.717391304348	214.913043478261	184.565217391304	184.608695652174	176.934782608696	172.239130434783	198.326086956522	182.804347826087	130.891304347826	157.369565217391	164.880434782609	172.565217391304	183.086956521739	187.467391304348	219.75	201.467391304348	205.54347826087	186.097826086957	182.065217391304	204.217391304348	191.804347826087	193.195652173913	211.467391304348	202.260869565217	174.434782608696	199.173913043478	178.847826086957	221.010869565217	206.695652173913	177.021739130435	193.195652173913	247.434782608696	195.04347826087	216.282608695652	198.565217391304	213.097826086957	193.345463043478	0.358088743446804
MOSMO	457.923913043478	456.5	429.347826086957	502.260869565217	461.771739130435	406.489130434783	441.195652173913	513.04347826087	531.521739130435	468.25	499.195652173913	633.804347826087	626.173913043478	424.521739130435	391.04347826087	718.29347826087	576.836956521739	469.271739130435	613.29347826087	839.902173913043	541.847826086957	564.945652173913	655.913043478261	782.391304347826	660.217391304348	577.804347826087	883.260869565218	653.45652173913	729.619565217391	706.423913043478	545.239130434783	626.108695652174	540.760869565217	609.478260869565	529.326086956522	465.336956521739	561.826086956522	575.95652173913	496.217391304348	427.5	525.086956521739	626.413043478261	503.608695652174	581.086956521739	677.130434782609	693.630434782609	569.591919565217	0.361237401146808
TTBK2	327.586956521739	387.913043478261	449	656.565217391304	519.478260869565	431.434782608696	398.891304347826	654	359.95652173913	423.695652173913	449.945652173913	582.510869565217	372.695652173913	354.239130434783	347.065217391304	450.45652173913	370.065217391304	309.804347826087	502.565217391304	518.521739130435	296.608695652174	444.967391304348	363.228260869565	458.239130434783	473.826086956522	377.739130434783	483.130434782609	357.478260869565	397.804347826087	496.391304347826	322.782608695652	413.467391304348	415.391304347826	549.152173913044	444.478260869565	339.739130434783	378	575.95652173913	381.945652173913	464.619565217391	333.489130434783	562.608695652174	356.45652173913	369.021739130435	467.760869565217	598.195652173913	434.540643478261	0.872319697382226
SURF6	288.195652173913	243.989130434783	310.097826086957	306.228260869565	323.45652173913	279.869565217391	282.684782608696	272.923913043478	292.04347826087	301.402173913044	356.695652173913	291.597826086957	311.086956521739	323.5	293.913043478261	247.434782608696	284.54347826087	314.163043478261	331.934782608696	242.065217391304	331.576086956522	323.54347826087	247.739130434783	280	274.847826086957	357.695652173913	267.021739130435	335.04347826087	291.54347826087	280.152173913044	347.978260869565	320.760869565217	348.923913043478	260.29347826087	270.967391304348	333.217391304348	238.934782608696	270.695652173913	334.021739130435	330.652173913044	313.673913043478	315.260869565217	351.978260869565	287.217391304348	270.521739130435	303.913043478261	299.695658695652	0.593754333164763
ASMTL	168.413043478261	191.630434782609	187.282608695652	199.413043478261	186.891304347826	201.184782608696	181.239130434783	192.347826086957	202.630434782609	151.260869565217	194.717391304348	175.934782608696	188.195652173913	206.902173913043	230.282608695652	170.891304347826	166.978260869565	227.217391304348	202.413043478261	178.695652173913	191.804347826087	190.065217391304	184.152173913043	181.902173913044	200.065217391304	205.184782608696	199.597826086957	205.760869565217	180.195652173913	196.652173913043	213.326086956522	181.847826086957	169.75	209.782608695652	157.326086956522	199.173913043478	192.29347826087	195.54347826087	174.402173913044	216.108695652174	217.673913043478	211.467391304348	148.467391304348	166.739130434783	195.54347826087	195.010869565217	190.96432173913	0.993377363965249
SNAPC4	314.521739130435	261.826086956522	246.663043478261	233.217391304348	231.652173913044	222.597826086957	326	224.934782608696	285.108695652174	248.641304347826	254.173913043478	214.913043478261	259.597826086957	238.45652173913	270.597826086957	235.847826086957	232.652173913043	281	219.858695652174	201.891304347826	276.141304347826	216.282608695652	257.021739130435	196.652173913043	260.29347826087	251.45652173913	217.913043478261	293.152173913044	270.29347826087	218.04347826087	274.282608695652	246.95652173913	225.619565217391	234.119565217391	230.326086956522	327.434782608696	284.413043478261	242.934782608696	256.130434782609	297.260869565217	307.641304347826	227.326086956522	220.184782608696	229.554347826087	242.891304347826	203.195652173913	250.25377826087	0.910611653060544
NAGA	281.760869565217	325.326086956522	306.663043478261	316.239130434783	301.891304347826	347.04347826087	327.434782608696	314.347826086957	279.913043478261	303.70652173913	291.173913043478	335.326086956522	271.869565217391	326.054347826087	397.565217391304	323	302.760869565217	337.119565217391	334.021739130435	297.673913043478	283.521739130435	290.141304347826	299.489130434783	290.065217391304	285.173913043478	355.891304347826	312.586956521739	288.521739130435	285.934782608696	307.695652173913	294.021739130435	285.891304347826	339.478260869565	268.75	279.423913043478	312.413043478261	339.847826086957	313.673913043478	329.847826086957	333.326086956522	322.782608695652	331.652173913044	295.228260869565	307.586956521739	297.217391304348	279.554347826087	309.795836956522	0.742822939807872
TRIM2	211.630434782609	174.717391304348	190.423913043478	211.086956521739	245.065217391304	182.815217391304	176.304347826087	231.847826086957	204.130434782609	215.20652173913	261.086956521739	303.032608695652	257.608695652174	162.239130434783	188.152173913043	298.130434782609	325.032608695652	181.847826086957	168.086956521739	330.086956521739	245.782608695652	252.641304347826	263.173913043478	353.95652173913	237.619565217391	239.586956521739	341.304347826087	214.913043478261	240.304347826087	252.565217391304	217.673913043478	159.586956521739	175.29347826087	236.173913043478	239.79347826087	117.184782608696	137.478260869565	257.413043478261	210.097826086957	96.3478260869565	132.173913043478	239.608695652174	154.347826086957	174.195652173913	178.913043478261	339.076086956522	222.298672391304	0.470841604168142
HEBP1	722.5	703.717391304348	708.782608695652	572.467391304348	671.282608695652	680.869565217391	698.54347826087	609.782608695652	663.521739130435	655.5	666.478260869565	565.913043478261	661.597826086957	729.239130434783	661.326086956522	603.402173913044	715.239130434783	655.695652173913	654.228260869565	521.673913043478	772.369565217391	620.836956521739	676.5	559.717391304348	615.565217391304	562.152173913044	581.369565217391	638.391304347826	628.25	591.521739130435	576.565217391304	623.315217391304	601.358695652174	597.086956521739	568.54347826087	617.717391304348	601.782608695652	594.630434782609	641.804347826087	606.097826086957	658.739130434783	635.739130434783	623.217391304348	595.608695652174	708.576086956522	618	635.591682608696	0.292122882576362
PGBD1	266.608695652174	334.315217391304	315.402173913044	355.434782608696	329.782608695652	311.239130434783	290.565217391304	393.608695652174	279.913043478261	340.771739130435	276.576086956522	324.347826086957	310.217391304348	301.510869565217	296.369565217391	308.728260869565	315.913043478261	279.913043478261	320.934782608696	340.641304347826	337.065217391304	302.836956521739	337	335.923913043478	295.228260869565	299.04347826087	330.902173913044	292.228260869565	287.847826086957	284.086956521739	294.021739130435	264.771739130435	282.45652173913	364.717391304348	339.739130434783	304.054347826087	328.608695652174	377.934782608696	248.717391304348	257.717391304348	291.282608695652	403.717391304348	284.282608695652	271.130434782609	272.739130434783	327.673913043478	311.054817391304	0.515312536794116
CRTC2	274.79347826087	267.891304347826	265.380434782609	294.369565217391	279.586956521739	279.869565217391	280.086956521739	260.152173913044	318.021739130435	276.065217391304	274.076086956522	263.739130434783	329.086956521739	329.532608695652	275.826086956522	311.239130434783	244.923913043478	295.652173913044	329.086956521739	288.152173913044	290.086956521739	291.228260869565	285.597826086957	239.847826086957	312.5	284.086956521739	289.608695652174	300.04347826087	273.652173913044	305.760869565217	285.597826086957	296.239130434783	248.076086956522	287.847826086957	284.141304347826	347.847826086957	272.673913043478	261.239130434783	328.673913043478	351	298.815217391304	260.54347826087	336.25	300.152173913044	283.521739130435	278.304347826087	289.801515217391	0.361237401146808
CHERP	649.804347826087	633.978260869565	684.934782608696	584.880434782609	639	652.45652173913	689.782608695652	590.978260869565	626.782608695652	579.847826086957	555.423913043478	550.130434782609	637.391304347826	685.804347826087	607.010869565217	481.510869565217	572.260869565217	626.173913043478	637.54347826087	482.739130434783	651.815217391304	602.347826086957	582.978260869565	496.804347826087	587.369565217391	624.847826086957	505.130434782609	586.673913043478	582.097826086957	591.521739130435	652.695652173913	567.45652173913	586.369565217391	553.347826086957	622.391304347826	696.282608695652	566.239130434783	531.956521739131	616.641304347826	596.521739130435	649.902173913044	557.152173913044	700.152173913044	571.869565217391	610.880434782609	590.228260869565	601.089315217391	0.872319697382226
NAGPA	181.652173913043	171.565217391304	150.152173913043	158.652173913043	191.108695652174	175.45652173913	185.782608695652	125.673913043478	185.717391304348	178.913043478261	141.369565217391	188.521739130435	240.521739130435	256.141304347826	185.478260869565	199.380434782609	200.673913043478	218.141304347826	209.402173913044	160.260869565217	202.978260869565	224.630434782609	166.45652173913	160.336956521739	169.021739130435	186.108695652174	157.434782608696	173.586956521739	204.79347826087	170.782608695652	196.173913043478	195.847826086957	207.195652173913	178.217391304348	202.304347826087	248.467391304348	199.347826086957	179.619565217391	239.79347826087	257.717391304348	203.804347826087	144.391304347826	316.45652173913	168.934782608696	186.978260869565	160.739130434783	191.449669565217	0.280674532404896
DSTNP2	469.217391304348	430.554347826087	452.434782608696	699.413043478261	395.891304347826	404.217391304348	461.554347826087	679.782608695652	546.532608695652	468.25	555.423913043478	628.608695652174	566.673913043478	604.695652173913	739.978260869565	678.739130434783	605.217391304348	636.95652173913	808.086956521739	580.630434782609	551.097826086957	607.380434782609	608.978260869565	698.260869565217	575.673913043478	630.217391304348	635.913043478261	515.815217391304	533.347826086957	675.260869565217	469.434782608696	483.978260869565	503.054347826087	738.652173913044	533.695652173913	448.271739130435	423.978260869565	668	476.858695652174	481.880434782609	509.152173913044	717.065217391304	510.826086956522	469.869565217391	478.20652173913	708.782608695652	566.66327826087	0.872319697382226
DDX55	551.739130434783	576.891304347826	574	710.913043478261	577.978260869565	616.217391304348	599.108695652174	700.065217391304	596.282608695652	582.608695652174	713.95652173913	688.652173913044	574.130434782609	731.79347826087	689.434782608696	628.760869565217	567.934782608696	689	685.413043478261	690.413043478261	611.369565217391	552.673913043478	566.673913043478	601.358695652174	577.804347826087	667.771739130435	683.760869565217	551.739130434783	737.782608695652	608.902173913044	578.826086956522	617.717391304348	542.695652173913	619.195652173913	553.54347826087	621.673913043478	638.130434782609	668.760869565217	552.25	787.532608695652	611.75	623.315217391304	717.804347826087	602.347826086957	593.065217391304	537.021739130435	625.451319565218	0.868053321767836
ZNF3	360.195652173913	427.141304347826	403.271739130435	426.097826086957	370.608695652174	404.217391304348	389.239130434783	405.521739130435	514.804347826087	382.521739130435	429.45652173913	500.076086956522	443.630434782609	485.847826086957	573.304347826087	479.902173913044	405.652173913044	493.673913043478	539.739130434783	448.086956521739	400.989130434783	475.097826086957	383.847826086957	439.826086956522	459.880434782609	395.108695652174	511.826086956522	489.217391304348	476.826086956522	488.195652173913	530.978260869565	447.79347826087	417.847826086957	457.271739130435	409.891304347826	476.326086956522	462.728260869565	395.717391304348	514.391304347826	704.413043478261	595.152173913044	390.347826086957	572.04347826087	461.5	408.391304347826	385.608695652174	457.265354347826	0.280977609908587
ATF7IP2	265	288.108695652174	317.25	441.630434782609	286.695652173913	283.45652173913	320.369565217391	460.891304347826	211.5	293.782608695652	265.217391304348	294.20652173913	183.326086956522	263.271739130435	262.902173913044	275.5	191.347826086957	182.804347826087	260.108695652174	243.304347826087	181.95652173913	214.086956521739	221.586956521739	284.630434782609	235.347826086957	216.978260869565	245.445652173913	241.163043478261	252.45652173913	293.847826086957	304.434782608696	321.565217391304	278.597826086957	443.282608695652	294.282608695652	195.586956521739	366.934782608696	440.521739130435	288.521739130435	340.586956521739	307.641304347826	444.663043478261	289.739130434783	287.217391304348	362.195652173913	443.565217391304	291.032841304348	0.309344296585431
UBXN8	427.434782608696	420.760869565217	385.108695652174	518.173913043478	339.260869565217	446.565217391304	382.152173913044	518.076086956522	351.652173913044	459.586956521739	542.434782608696	423.913043478261	394.695652173913	428.510869565217	427.804347826087	410.717391304348	367.20652173913	325.260869565217	384.021739130435	417.673913043478	391.673913043478	392.423913043478	550.065217391304	381.478260869565	431.467391304348	385.565217391304	466.652173913044	398.195652173913	448.967391304348	484.402173913044	399.097826086957	404.804347826087	414.478260869565	435.978260869565	324.847826086957	354.945652173913	360.978260869565	456.826086956522	388.228260869565	373.913043478261	385.45652173913	509.304347826087	347.771739130435	390.413043478261	415.217391304348	460.326086956522	415.749767391304	0.582780020413721
SPAG16	459.880434782609	488.260869565217	592.5	521.782608695652	538.391304347826	599.956521739131	512.619565217391	476.239130434783	437.239130434783	595.228260869565	442.108695652174	480.934782608696	317.54347826087	529.423913043478	465.5	524.423913043478	514.478260869565	501.163043478261	423.760869565217	471.195652173913	447.913043478261	477.75	392.782608695652	438.782608695652	513.978260869565	462.086956521739	416.804347826087	476.608695652174	462.54347826087	497.989130434783	430.010869565217	466.413043478261	502.260869565217	480.173913043478	371.521739130435	406.076086956522	551.739130434783	538.391304347826	464.54347826087	551.554347826087	486.239130434783	508.456521739131	525.782608695652	506.782608695652	476.130434782609	440.695652173913	482.318286956522	0.771037142719046
GPHN	489.565217391304	487.032608695652	513.010869565218	549.847826086957	527.5	559.413043478261	496.717391304348	571.260869565217	450.45652173913	442.326086956522	547.804347826087	574.45652173913	467.195652173913	441.923913043478	472.04347826087	592.184782608696	524.130434782609	489.54347826087	532.380434782609	605.021739130435	548.065217391304	416.652173913044	485.195652173913	539.326086956522	445.858695652174	532.608695652174	579.804347826087	490.54347826087	504.554347826087	477.75	477.923913043478	474.804347826087	496.902173913044	530.913043478261	326.79347826087	448.967391304348	518.869565217391	519.815217391304	521.304347826087	471.913043478261	528.652173913044	560.978260869565	496.391304347826	527.869565217391	559.913043478261	498.630434782609	506.843804347826	0.800453726178888
AGA	565.913043478261	707.760869565217	635.619565217391	720.760869565217	569.054347826087	718.119565217391	582.847826086957	734.847826086957	594.065217391304	547.239130434783	700.978260869565	676.771739130435	615.478260869565	684.826086956522	799.695652173913	715.45652173913	665.782608695652	621.79347826087	620.630434782609	659.673913043478	622	616.641304347826	630.695652173913	639.586956521739	618	675.260869565217	579.804347826087	556.913043478261	636.663043478261	724.532608695652	562.25	589.130434782609	599.239130434783	690.108695652174	580.119565217391	531.119565217391	627.391304347826	745.413043478261	607.956521739131	662.739130434783	653.79347826087	619.326086956522	636.130434782609	623.586956521739	623.217391304348	676.652173913044	640.556236956522	0.57781128178991
ARL16	300.260869565217	282.782608695652	254.358695652174	266.913043478261	256.391304347826	277.065217391304	236.130434782609	269.586956521739	347.054347826087	250.304347826087	307.804347826087	257.913043478261	292.869565217391	244.086956521739	234.739130434783	261.032608695652	252.152173913043	229.391304347826	231.739130434783	287.010869565217	283.521739130435	262.70652173913	298.282608695652	224.54347826087	252.326086956522	268.902173913044	346.29347826087	259.326086956522	246.173913043478	275.826086956522	270.630434782609	258.380434782609	215.173913043478	260.978260869565	266.45652173913	273.586956521739	266.217391304348	253.391304347826	237.869565217391	256.336956521739	225.391304347826	271.70652173913	292.152173913044	262.45652173913	283.521739130435	254.217391304348	265.34687826087	0.687887951663988
CEP95	551.739130434783	658.347826086957	717.163043478261	669.532608695652	669.771739130435	663.521739130435	616.978260869565	628.913043478261	730.141304347826	702.326086956522	703.315217391304	482.673913043478	597.217391304348	713	594.391304347826	580.021739130435	601.282608695652	782.826086956522	694.304347826087	617.086956521739	603.934782608696	636.663043478261	602.217391304348	530.695652173913	765.847826086957	627.173913043478	619.934782608696	690.804347826087	640.695652173913	592.95652173913	610.717391304348	689.782608695652	670.521739130435	660.934782608696	588.978260869565	754.304347826087	776.717391304348	659.413043478261	763.880434782609	776.391304347826	701.576086956522	614.347826086957	838.195652173913	734.728260869565	673.728260869565	601.108695652174	660.887045652174	0.280674532404896
ST3GAL2	705.891304347826	631.239130434783	648.184782608696	598.369565217391	738.815217391304	634.413043478261	740.652173913044	515.467391304348	571.760869565217	570.467391304348	461.717391304348	560.195652173913	615.478260869565	615.565217391304	631.847826086957	511.423913043478	551.739130434783	603.836956521739	613.29347826087	502.260869565217	528.934782608696	624.847826086957	483.978260869565	536.097826086957	554.04347826087	536.315217391304	509.402173913044	606.597826086957	535.336956521739	538.391304347826	658.021739130435	646.510869565217	659.065217391304	540.760869565217	680.032608695652	818.108695652174	582.608695652174	580.695652173913	711.195652173913	708.04347826087	753.717391304348	622.391304347826	705.304347826087	604.5	563.152173913044	611.847826086957	607.011347826087	0.396854543060206
DUXAP8	352.597826086957	437.239130434783	379	433.282608695652	390.717391304348	404.217391304348	369.826086956522	399.347826086957	351.652173913044	421.608695652174	340.641304347826	381.217391304348	292.869565217391	293.967391304348	284.54347826087	315.086956521739	349.130434782609	285.739130434783	318.5	357.119565217391	297.423913043478	327.858695652174	335.391304347826	355.097826086957	312.5	353.608695652174	342.489130434783	318.434782608696	310.434782608696	364.065217391304	314.597826086957	318.739130434783	357.54347826087	369.673913043478	364.913043478261	329.75	430.304347826087	459.913043478261	389.29347826087	327.369565217391	367.173913043478	434.565217391304	311.978260869565	393.891304347826	425.260869565217	432.119565217391	358.754252173913	0.688956493998473
DUXAP8	0	0	0	0	0	0	0	0	0	0	0	0	0	0	0	0	0	0	0	0	0	0	0	0	0	0	0	0	0	0	0	0	0	0	0	0	0	0	0	0	0	0	0	0	0	0	0	1
PDCD2L	323.913043478261	281.815217391304	268.630434782609	288.586956521739	274.076086956522	267.413043478261	266.54347826087	326.728260869565	315.510869565217	311.652173913044	334.45652173913	267.586956521739	308.934782608696	322.586956521739	293.913043478261	285.673913043478	311.913043478261	296.978260869565	284.347826086957	268.608695652174	335.45652173913	288.934782608696	305.510869565217	283.282608695652	232.576086956522	305.326086956522	226.608695652174	258.521739130435	306.478260869565	302.489130434783	336.739130434783	278.369565217391	266.217391304348	317.130434782609	318.467391304348	291.152173913044	316.565217391304	266.021739130435	311.184782608696	327.369565217391	296.04347826087	348.239130434783	399.097826086957	314.021739130435	281.869565217391	308.782608695652	298.311436956522	0.29937308481829
MRPL45P2	180.391304347826	167.434782608696	176.45652173913	209.695652173913	174.434782608696	189.195652173913	172.239130434783	199.782608695652	198.108695652174	213.826086956522	178.652173913043	189.760869565217	210.913043478261	192.380434782609	191.347826086957	178.978260869565	167.782608695652	165.45652173913	208.445652173913	187.173913043478	157.728260869565	205.217391304348	188.782608695652	188.782608695652	214.130434782609	222.217391304348	141.478260869565	203.347826086957	193.54347826087	233.163043478261	166.673913043478	167.282608695652	138.467391304348	210.826086956522	191.565217391304	150.891304347826	157.086956521739	225.739130434783	132.173913043478	191.630434782609	154.326086956522	209.70652173913	191.869565217391	175.217391304348	184.271739130435	197.782608695652	185.790406521739	0.708269709200534
IGFL2-AS1	638.391304347826	462.913043478261	414.173913043478	269.260869565217	385.163043478261	410.978260869565	414.608695652174	266.195652173913	505.282608695652	596.695652173913	712.434782608696	458.826086956522	590.978260869565	489.326086956522	446.95652173913	376.847826086957	390.630434782609	442.978260869565	427.04347826087	421.163043478261	463.315217391304	620.836956521739	558.141304347826	442.891304347826	379.586956521739	291.336956521739	395.891304347826	429	506.5	482.923913043478	364.391304347826	360.663043478261	270.217391304348	367.913043478261	731.152173913044	462.913043478261	375.217391304348	338.152173913044	325.402173913044	399.663043478261	330.173913043478	207.880434782609	539.065217391304	541.45652173913	483.847826086957	408.695652173913	439.088610869565	0.624925084897939
EMB	512.152173913044	617.717391304348	560.673913043478	732.630434782609	536.956521739131	576.369565217391	563.630434782609	723.673913043478	483.804347826087	495.456521739131	540.54347826087	742.728260869565	545.934782608696	470.826086956522	565.771739130435	691.847826086957	711.130434782609	493.673913043478	508.086956521739	755.597826086957	637.108695652174	518.173913043478	559.717391304348	747.413043478261	612.739130434783	569.902173913044	748.478260869565	539.739130434783	618.336956521739	638.391304347826	541.684782608696	529.739130434783	536.021739130435	734.728260869565	484.521739130435	390.239130434783	533.413043478261	704.173913043478	472.869565217391	448.869565217391	536.956521739131	675.695652173913	419.086956521739	541.45652173913	603.836956521739	704.5	584.282606521739	0.585292872973451
ALDH16A1	378	468.45652173913	419.869565217391	383.347826086957	421.717391304348	476.826086956522	510.228260869565	346.978260869565	482.423913043478	432.760869565217	402.717391304348	374.086956521739	398.652173913044	579.934782608696	546.532608695652	405.217391304348	440.119565217391	523.239130434783	516.782608695652	368.880434782609	470.902173913044	510.032608695652	402.956521739131	347.391304347826	386.619565217391	463.826086956522	295.326086956522	473.173913043478	431.826086956522	452.739130434783	365.54347826087	438.673913043478	405.413043478261	324.108695652174	396.445652173913	503.456521739131	426.152173913044	341.152173913044	450.065217391304	570.684782608696	539.739130434783	310.684782608696	542.79347826087	416.554347826087	341.913043478261	337.326086956522	430.918954347826	0.836403950946765
BTD	227.934782608696	223.04347826087	242.141304347826	221.586956521739	210.869565217391	221.239130434783	210.576086956522	245	289.217391304348	266.673913043478	257.065217391304	259.54347826087	301.728260869565	223.630434782609	239.630434782609	238.5	232.652173913043	246.20652173913	211.782608695652	276.70652173913	209.29347826087	262.70652173913	299.489130434783	315.510869565217	263.978260869565	284.086956521739	291.152173913044	274.739130434783	270.29347826087	260.771739130435	226.739130434783	230.119565217391	242	233.163043478261	290.086956521739	263.271739130435	245.739130434783	201.315217391304	247.347826086957	211.434782608696	228.869565217391	257.565217391304	230.521739130435	292.5	261.978260869565	261.630434782609	250.044186956522	0.701487486217832
NPM3	384.923913043478	418.836956521739	383.902173913044	380.108695652174	544.413043478261	399.760869565217	479.130434782609	378.065217391304	542.54347826087	489.956521739131	426.391304347826	423.010869565217	420.369565217391	345.989130434783	318.891304347826	342.608695652174	485.108695652174	380.869565217391	272.413043478261	439.826086956522	510.826086956522	340.641304347826	410.065217391304	422.369565217391	385.163043478261	434.673913043478	516.782608695652	460.652173913044	346.826086956522	310.586956521739	422.934782608696	410.978260869565	456	336.597826086957	290.086956521739	383.847826086957	429	404.239130434783	445.021739130435	239.847826086957	334.565217391304	436.913043478261	295.228260869565	441.510869565217	374.347826086957	386.478260869565	401.810965217391	0.318564595977545
AP3S2	551.739130434783	603.739130434783	588.489130434783	543.630434782609	551.652173913044	634.413043478261	585.152173913044	571.260869565217	568.456521739131	615.391304347826	616.217391304348	596.184782608696	526.597826086957	553.434782608696	551.097826086957	592.95652173913	553.913043478261	543.826086956522	549.847826086957	563.934782608696	567.54347826087	581.260869565217	644.521739130435	559.717391304348	588.260869565217	577.804347826087	640.086956521739	560.086956521739	541.847826086957	545.326086956522	518.304347826087	644.130434782609	648.065217391304	471.673913043478	493.565217391304	620.989130434783	555.423913043478	593.445652173913	606.260869565218	580.021739130435	535.434782608696	594.228260869565	529.836956521739	659.173913043478	603.836956521739	588.586956521739	576.334119565217	0.893131383311811
AC083799.1	246.086956521739	293.108695652174	218.782608695652	311.978260869565	268.065217391304	281.239130434783	226.782608695652	309.347826086957	430.010869565217	314.065217391304	382.521739130435	443.282608695652	410.326086956522	326.054347826087	441.586956521739	463.108695652174	534.532608695652	335.423913043478	418.804347826087	481.510869565217	498.891304347826	428.086956521739	514.565217391304	474.913043478261	376.021739130435	644.521739130435	420.239130434783	443.347826086957	504.554347826087	544.413043478261	346.04347826087	245.565217391304	270.967391304348	302.282608695652	237.239130434783	195.586956521739	263.978260869565	355.5	368.423913043478	206.086956521739	282.782608695652	371.717391304348	297.423913043478	360.717391304348	334.021739130435	384.95652173913	365.423197826087	0.79817505505541
PPARA	237	319.804347826087	303.086956521739	231.760869565217	272.739130434783	256.652173913044	270.869565217391	233.086956521739	279.913043478261	244.021739130435	223.065217391304	217.184782608696	276.065217391304	248.760869565217	204.826086956522	215.20652173913	239.684782608696	283.869565217391	244.739130434783	315.652173913044	222.532608695652	367.423913043478	361.065217391304	343.086956521739	329.065217391304	381.826086956522	357.402173913044	373.434782608696	359.173913043478	341.695652173913	320.673913043478	372.326086956522	343.565217391304	273.521739130435	432.413043478261	316.565217391304	301.402173913044	259.195652173913	262.45652173913	292	277.5	305.804347826087	251.728260869565	263.467391304348	295.086956521739	312.586956521739	292.064984782609	0.280674532404896
PANK4	259.391304347826	320.717391304348	240.902173913044	224.45652173913	274.076086956522	270.630434782609	267.5	201.739130434783	301.630434782609	240.902173913044	198.304347826087	234.608695652174	234.163043478261	252.869565217391	244.054347826087	228.934782608696	234.652173913043	291.336956521739	240.521739130435	211.065217391304	240.347826086957	238	216.04347826087	236.032608695652	217.728260869565	251.45652173913	212.663043478261	236.402173913044	270.29347826087	233.163043478261	276.521739130435	238.065217391304	211.467391304348	264.532608695652	295.978260869565	278.423913043478	216.934782608696	246.565217391304	237.869565217391	260.913043478261	259.597826086957	228.271739130435	288.304347826087	242.141304347826	202.565217391304	219.586956521739	245.485343478261	0.854761287454209
CSNK1G2	414.608695652174	382.815217391304	354.79347826087	266.195652173913	386.510869565217	418.510869565217	463.891304347826	245	421.989130434783	357.54347826087	279.054347826087	276.521739130435	523.04347826087	492.45652173913	341	330.847826086957	400.108695652174	439.119565217391	335.25	304.489130434783	461.826086956522	445.934782608696	356.771739130435	319.630434782609	377.70652173913	438.413043478261	286.021739130435	380.95652173913	354.239130434783	280.152173913044	430.010869565217	391.239130434783	410.717391304348	266.913043478261	451.804347826087	552.021739130435	433.282608695652	268.673913043478	402	481.880434782609	443.217391304348	265.95652173913	550.847826086957	356.04347826087	289.130434782609	257.184782608696	377.963602173913	0.82327002580343
AC106795.1	278.565217391304	226.021739130435	209.630434782609	315.326086956522	240.478260869565	208.771739130435	202.347826086957	319.065217391304	230.608695652174	255.913043478261	312.673913043478	213.70652173913	213.782608695652	274.79347826087	250.304347826087	211.467391304348	247.25	228.304347826087	334.021739130435	169.260869565217	246.95652173913	183.804347826087	270.065217391304	199.173913043478	243.771739130435	244.130434782609	226.608695652174	226.739130434783	238.282608695652	220.108695652174	204.880434782609	207.478260869565	190.010869565217	214.239130434783	190.065217391304	224.804347826087	175.45652173913	252.565217391304	215.5	251.45652173913	219.130434782609	260.54347826087	252.804347826087	196.478260869565	189.54347826087	217.586956521739	232.706036956522	0.280674532404896
SLC38A6	741.086956521739	751.684782608696	664.065217391304	798.326086956522	617.902173913044	718.119565217391	626.586956521739	898.54347826087	506.782608695652	636.782608695652	727.728260869565	693.130434782609	465.04347826087	561.989130434783	635.086956521739	671.217391304348	578.141304347826	493.673913043478	560.195652173913	672.739130434783	583.978260869565	562.152173913044	667.239130434783	699.826086956522	508.652173913044	566.184782608696	727.54347826087	529.554347826087	644.956521739131	650.717391304348	494.847826086957	567.45652173913	528.434782608696	720.054347826087	577.445652173913	438.032608695652	618.597826086957	783.902173913044	547.521739130435	521.423913043478	538.391304347826	746.923913043478	550.847826086957	674.086956521739	734.956521739131	804.032608695652	630.577980434783	0.593754333164763
UQCR10	399.195652173913	335.45652173913	263.413043478261	254.413043478261	315.989130434783	282.326086956522	296.173913043478	281.478260869565	380.760869565217	314.065217391304	333.097826086957	360.663043478261	344.847826086957	307.880434782609	268.586956521739	377.934782608696	310.326086956522	301.195652173913	243.358695652174	409.304347826087	334.152173913044	299.663043478261	317.95652173913	369.380434782609	323.576086956522	306.891304347826	427.804347826087	333.934782608696	289.391304347826	280.152173913044	342.673913043478	317.869565217391	342.489130434783	231.065217391304	305.369565217391	324.391304347826	263.119565217391	261.826086956522	328.673913043478	249.54347826087	307.641304347826	294.652173913044	340.086956521739	380.684782608696	388.782608695652	324.195652173913	318.835539130435	0.957177709838127
EDF1	609.478260869565	425.413043478261	432.413043478261	286.5	499.369565217391	421.5	553.434782608696	242.369565217391	560.923913043478	434.760869565217	374.282608695652	309.282608695652	596.184782608696	655.239130434783	517.478260869565	289.217391304348	394.315217391304	573.869565217391	376.532608695652	287.010869565217	573.391304347826	484.673913043478	385.891304347826	265.304347826087	355.760869565217	374.782608695652	251.95652173913	490.54347826087	337.815217391304	300.836956521739	500.989130434783	414.934782608696	485.673913043478	291.163043478261	524.347826086957	635.739130434783	360.978260869565	278.423913043478	549.152173913044	441.586956521739	431.326086956522	271.70652173913	657.630434782609	331.260869565217	390.04347826087	238.45652173913	423.129254347826	0.811010381917973
SYDE1	352.597826086957	357.510869565217	292.5	289.369565217391	330.608695652174	328.728260869565	402.597826086957	250.369565217391	511.967391304348	263.836956521739	293.630434782609	314.347826086957	569.195652173913	463.260869565217	445.858695652174	340.380434782609	493.5	497.586956521739	470.75	319.489130434783	510.826086956522	409.108695652174	339.79347826087	337.5	361.173913043478	395.108695652174	246.978260869565	418.239130434783	349.130434782609	287.586956521739	316.282608695652	306.95652173913	289.608695652174	334.108695652174	503.130434782609	372.771739130435	351.304347826087	271.608695652174	270.369565217391	401.304347826087	350.239130434783	205.70652173913	338.782608695652	213.782608695652	270.521739130435	268.673913043478	354.536623913043	0.293202524988056
SLC20A2	486.565217391304	555.54347826087	515.608695652174	676.391304347826	547.782608695652	548.5	504.913043478261	679.782608695652	444.826086956522	501.086956521739	657.532608695652	697.478260869565	493.5	579.934782608696	659.54347826087	669.989130434783	489.217391304348	482.673913043478	731.228260869565	652.130434782609	481.586956521739	512.978260869565	587.706521739131	658.347826086957	491.978260869565	614.108695652174	654.847826086957	482.923913043478	556.347826086957	575.75	499.456521739131	534.04347826087	483.804347826087	603.739130434783	434.45652173913	487.5	492.554347826087	612.260869565218	522.652173913044	602.847826086957	558.217391304348	622.391304347826	588.021739130435	571.869565217391	531.304347826087	604.782608695652	563.9284	0.744294424480949
GALE	220.413043478261	202.391304347826	247.934782608696	192.347826086957	228.304347826087	221.239130434783	229.5	184.097826086957	252.739130434783	217.260869565217	267.413043478261	238.934782608696	263.739130434783	205.70652173913	227.978260869565	236.782608695652	248.304347826087	239.978260869565	186.086956521739	235.869565217391	351.978260869565	219.891304347826	219.75	201.304347826087	249.869565217391	224.369565217391	191.902173913044	237.434782608696	250.652173913044	202.804347826087	192.586956521739	213.858695652174	222.065217391304	168.695652173913	192.782608695652	242.065217391304	211.5	214.891304347826	215.5	229.086956521739	208.717391304348	212.608695652174	250.434782608696	254.054347826087	194.391304347826	169.75	223.694943478261	0.57781128178991
TBC1D32	229.5	216.45652173913	220.815217391304	294.967391304348	212.717391304348	285.521739130435	216.641304347826	270.760869565217	160.913043478261	228.032608695652	207.75	291.597826086957	186.673913043478	241.434782608696	206.934782608696	228.934782608696	238.239130434783	207.586956521739	225.739130434783	232.5	161.815217391304	205.217391304348	207.347826086957	269.847826086957	236.739130434783	179.891304347826	208.304347826087	190.641304347826	229.391304347826	248.717391304348	223.065217391304	244.782608695652	231.402173913044	286.065217391304	237.239130434783	185.184782608696	211.5	303.347826086957	285.217391304348	234.130434782609	222.065217391304	314.369565217391	235.347826086957	233.630434782609	252.326086956522	309.673913043478	233.716910869565	0.361237401146808
PIGF	530.695652173913	607.380434782609	627.630434782609	601.510869565217	520.108695652174	626.032608695652	566.130434782609	679.347826086957	448.54347826087	537.782608695652	541.630434782609	616.641304347826	441.195652173913	375.260869565217	405.152173913044	577.445652173913	471.445652173913	428.934782608696	389.076086956522	648.989130434783	467.989130434783	479.065217391304	482.673913043478	599.804347826087	488.619565217391	486.152173913044	630.413043478261	522.380434782609	506.5	515.467391304348	547.391304347826	644.130434782609	562.945652173913	594.152173913044	435.739130434783	526.141304347826	597.217391304348	628.54347826087	559.315217391304	521.423913043478	504.315217391304	661.326086956522	482.54347826087	711.130434782609	721.304347826087	616.717391304348	546.39862826087	0.426360589993057
FARSA	489.565217391304	344.380434782609	411.173913043478	329.532608695652	409.804347826087	353.608695652174	441.195652173913	317.54347826087	373.304347826087	358.836956521739	382.521739130435	379.130434782609	386.065217391304	489.326086956522	475.5	362.260869565217	330	395.489130434783	483.913043478261	348.684782608696	420.478260869565	345.597826086957	365.815217391304	322.021739130435	366.108695652174	361.130434782609	322.195652173913	434.673913043478	423.695652173913	340.510869565217	404.086956521739	383.902173913044	460.239130434783	329.565217391304	455.967391304348	498.304347826087	354	307.228260869565	409.108695652174	494.130434782609	512.760869565217	341.804347826087	499.456521739131	366.173913043478	406.891304347826	350.173913043478	394.30127173913	0.564582626695788
EID2	1336.32608695652	1312.26086956522	1095.58695652174	1203.67391304348	1135.0652173913	1151.76086956522	1182.9347826087	1162.97826086957	1479.76086956522	1337.46739130435	1199.89130434783	1104.45652173913	1224.28260869565	1172.19565217391	1122.10869565217	1130.84782608696	1325.82608695652	1197.45652173913	1111.20652173913	1000.79347826087	1318.8152173913	1120.91304347826	1298.65217391304	1110.34782608696	1157.77173913044	1216.17391304348	998.554347826087	1211.1847826087	1288.8152173913	1288.15217391304	1169.54347826087	1082.5652173913	1171.82608695652	1280.04347826087	1105.03260869565	1259.23913043478	1210.52173913043	1263.19565217391	1318.02173913043	1027.10869565217	1043.39130434783	1266.34782608696	1072.23913043478	1240.5	1094.35869565217	1349.5	1194.55863695652	0.803467492345781
LINC01578	1204.30434782609	1296.14130434783	1302.48913043478	1689.73913043478	1112.4347826087	1356.02173913043	1144.21739130435	1483.16304347826	1191.65217391304	1082.5652173913	1091.91304347826	1424.08695652174	1234.08695652174	1739.52173913044	1595.57608695652	1516.51086956522	1364.82608695652	1406.97826086957	1558.80434782609	1431.69565217391	1101.47826086957	1240.63043478261	1203.15217391304	1411.97826086957	1313.52173913043	1386.47826086957	1196.02173913043	1226.89130434783	1533.04347826087	1859.76086956522	1295.36956521739	1223.28260869565	1038.34782608696	1743.30434782609	1078.9347826087	1053.96739130435	1266.34782608696	1508.89130434783	1395.4347826087	1563.5652173913	1334.41304347826	1254.36956521739	1525.63043478261	1171.82608695652	1196.80434782609	1512	1344.82980434783	0.957515076800467
ELOB	909.076086956522	825.880434782609	762.95652173913	546.728260869565	848.315217391304	802.086956521739	889.413043478261	578.065217391304	791.413043478261	882.239130434783	731.065217391304	644.130434782609	845.391304347826	763.195652173913	592.673913043478	586.434782608696	721.521739130435	865.402173913044	628.717391304348	707.119565217391	996.010869565218	794.902173913044	741.739130434783	672.010869565217	798.195652173913	748.478260869565	755.358695652174	974.826086956522	660.521739130435	738.717391304348	981.521739130435	825.880434782609	827.358695652174	649.478260869565	859.95652173913	986.04347826087	791.804347826087	583.347826086957	982.597826086957	579.119565217391	726.5	604.869565217391	625.152173913044	828.673913043478	971.597826086957	697.076086956522	767.903591304348	0.85229254605076
GSK3A	1072.15217391304	1034.95652173913	1021.21739130435	727.728260869565	883.065217391305	882.54347826087	1015.25	687.45652173913	1003.09782608696	842	774.760869565218	885.956521739131	902.108695652174	926.195652173913	896.086956521739	934.467391304348	831.695652173913	842.413043478261	838.195652173913	874.804347826087	880.021739130435	930.967391304348	935.326086956522	898.695652173913	873.130434782609	881.086956521739	799.239130434783	935.739130434783	877.304347826087	752.260869565217	1044.04347826087	1023.66304347826	1024.17391304348	796.695652173913	1085.65217391304	1191.65217391304	1055.38043478261	756.315217391304	1071.63043478261	1034.60869565217	1135.58695652174	697.076086956522	1077.66304347826	956.804347826087	907.663043478261	794.717391304348	919.418452173913	0.396854543060206
POLR3D	660.021739130435	679.521739130435	718.804347826087	687.021739130435	761.239130434783	663.521739130435	746.521739130435	633.521739130435	834.130434782609	672.869565217391	538.728260869565	668.456521739131	758.554347826087	852.065217391304	805.54347826087	788.304347826087	673.826086956522	804.032608695652	790.847826086957	737.108695652174	662.054347826087	701.282608695652	683.760869565217	719.195652173913	670.065217391304	734.326086956522	674.347826086957	659.065217391304	715.95652173913	705.054347826087	778.706521739131	821.673913043478	801.5	723.54347826087	828.163043478261	873.456521739131	892.086956521739	749.826086956522	791.913043478261	935.836956521739	858.608695652174	656.152173913044	1000.60869565217	692.032608695652	661.130434782609	658.739130434783	741.820173913044	0.280674532404896
SLC25A17	1099.60869565217	1193.75	1140.45652173913	1254.78260869565	1031.82608695652	1144.21739130435	1078.67391304348	1189.28260869565	1065.30434782609	956.434782608696	994.184782608696	1179.5	1164.39130434783	1189.13043478261	1199.89130434783	1151.15217391304	1200.1847826087	1236.27173913043	1198.17391304348	1096.41304347826	1349.9347826087	1157.21739130435	1272.95652173913	1168.28260869565	1009.0652173913	1260.26086956522	874.934782608696	992.826086956522	1216.73913043478	1319.84782608696	1159.69565217391	1048.97826086957	942.108695652174	1371.65217391304	1152.32608695652	1089.75	1202.08695652174	1337.69565217391	1211.36956521739	1006.39130434783	983.836956521739	1094.47826086957	873.456521739131	963	986.04347826087	1274.6847826087	1132.24459130435	0.538027228094785
CSGALNACT2	1180.39130434783	1296.14130434783	1119.13043478261	1330.69565217391	1105.96739130435	1269.28260869565	1119.36956521739	1377.27173913043	1183.4347826087	1165.20652173913	1249.78260869565	1183.28260869565	1319.84782608696	1147.36956521739	1082.35869565217	1159.30434782609	1200.1847826087	1074.86956521739	1167.26086956522	1208.76086956522	1209.64130434783	1180.51086956522	1288.8152173913	1239.17391304348	1144.63043478261	1201.86956521739	1331.78260869565	1150.41304347826	1252.34782608696	1263.86956521739	1263.69565217391	1272.08695652174	1069.63043478261	1409.0652173913	1117.65217391304	1074.23913043478	1134.55434782609	1417.04347826087	1044.76086956522	1019.28260869565	994.608695652174	1415.21739130435	1020.69565217391	1078.4347826087	1069.63043478261	1383.64130434783	1195.37410217391	0.51787426222086
CTSA	839.326086956522	784.782608695652	706.423913043478	515.54347826087	777.95652173913	737.195652173913	749.260869565217	496.760869565217	832.630434782609	712.663043478261	606.815217391304	640.086956521739	774.25	815.336956521739	597.913043478261	673.826086956522	651.913043478261	748.217391304348	510.641304347826	628.608695652174	682.782608695652	754.217391304348	637.391304347826	628.717391304348	633.141304347826	633.663043478261	556.913043478261	785.391304347826	644.956521739131	501.554347826087	742.869565217391	784.565217391304	731.228260869565	588.880434782609	836.836956521739	1037.29347826087	731.152173913044	487.152173913044	751.934782608696	817.239130434783	757.804347826087	470.902173913044	895.130434782609	829.652173913044	776.717391304348	484.804347826087	695.283541304348	0.708269709200534
RGMB	419.967391304348	345.804347826087	363.04347826087	427.239130434783	358.717391304348	334.847826086957	352.282608695652	468.95652173913	408.065217391304	436.347826086957	483.804347826087	439.54347826087	402.152173913044	344.717391304348	385.608695652174	439.347826086957	408.413043478261	345.29347826087	439.652173913044	430.717391304348	402.597826086957	382.934782608696	501.554347826087	433.347826086957	429	447.913043478261	489.021739130435	377.673913043478	492.217391304348	457.663043478261	399.097826086957	357.847826086957	358.95652173913	402.597826086957	368.260869565217	350.619565217391	404.804347826087	415.478260869565	383.402173913044	342.652173913044	319.25	437.826086956522	330.130434782609	382.934782608696	406.891304347826	408.695652173913	402.562847826087	0.526298985243483
CENPC	374.347826086957	444.173913043478	381.108695652174	492.913043478261	452	507.826086956522	369.173913043478	467.847826086957	414.934782608696	382.521739130435	360.891304347826	496.391304347826	461.771739130435	435.739130434783	497	610.880434782609	562.891304347826	476.478260869565	509.5	560.413043478261	454.510869565217	510.717391304348	463.260869565217	603.619565217391	543.913043478261	495.130434782609	536.891304347826	449.739130434783	514.478260869565	576.782608695652	382.021739130435	447.173913043478	428.934782608696	451.228260869565	323.108695652174	334.891304347826	433.282608695652	495.945652173913	366.239130434783	373.913043478261	396.608695652174	401.847826086957	311.978260869565	382.934782608696	403.054347826087	363.413043478261	450.096165217391	0.280674532404896
MTO1	635.282608695652	604.869565217391	508.869565217391	652.021739130435	587.652173913044	608.652173913044	526.04347826087	708.673913043478	524.847826086957	652.913043478261	693.29347826087	654.967391304348	571.510869565217	518.521739130435	606.097826086957	574.358695652174	576.836956521739	538.391304347826	544.413043478261	614.521739130435	577.978260869565	520.54347826087	573.391304347826	612.478260869565	575.673913043478	566.184782608696	628.347826086957	589.717391304348	606.097826086957	688.108695652174	581.826086956522	530.913043478261	509.228260869565	645.706521739131	524.347826086957	511.086956521739	539.239130434783	620.913043478261	597.826086956522	554.869565217391	575.826086956522	755.195652173913	607.086956521739	596.521739130435	680.391304347826	700.239130434783	595.053876086957	0.769072761794436
TTC30B	545.326086956522	558.717391304348	496.619565217391	590.402173913044	468.25	561.608695652174	513.739130434783	581.586956521739	325.739130434783	578.065217391304	514.652173913044	462.467391304348	279.826086956522	465.847826086957	439.54347826087	429.5	337.391304347826	343.847826086957	361.217391304348	378.130434782609	320.445652173913	379.75	385.891304347826	345.5	353.152173913044	393.380434782609	318.021739130435	408.826086956522	339.369565217391	457.663043478261	368.021739130435	425.489130434783	450.45652173913	540.760869565217	454.663043478261	371.760869565217	498.478260869565	543.521739130435	440.521739130435	453.021739130435	442.054347826087	541.45652173913	446.260869565217	523.45652173913	542.326086956522	579.565217391304	446.875941304348	0.935295902547501
GNAI2	1107.65217391304	1018.58695652174	1060.84782608696	971.826086956522	1012.46739130435	1025.15217391304	1129.91304347826	950.673913043478	1191.65217391304	1044.04347826087	922.891304347826	893.586956521739	1234.08695652174	1266.98913043478	1332.04347826087	978.467391304348	1076.61956521739	1153.65217391304	1284.13043478261	888.04347826087	1076.45652173913	1118.04347826087	1020.39130434783	808.619565217391	1014.48913043478	1031.82608695652	865.5	1113.44565217391	991.478260869565	912.858695652174	1067.3152173913	1024.85869565217	1128.97826086957	1028.73913043478	1330.45652173913	1179.77173913044	1083.54347826087	978.717391304348	1288.60869565217	1374.82608695652	1335.41304347826	951.804347826087	1340.73913043478	1033.54347826087	1070.76086956522	966.847826086956	1080.02948478261	0.37290902604783
RER1	1038.19565217391	1007.26086956522	1051.33695652174	787.532608695652	1010.78260869565	952.152173913043	1068.21739130435	781.304347826087	970.326086956522	1044.04347826087	1052.25	948.717391304348	915.282608695652	890.673913043478	801.75	904.434782608696	955.239130434783	973.630434782609	844.173913043478	1037.84782608696	1041.28260869565	981.739130434783	893.326086956522	950.673913043478	952.717391304348	990.239130434782	1103.71739130435	1030.5	911.423913043478	824.5	1026.96739130435	997.695652173913	997.565217391304	764.967391304348	942.304347826087	1082.76086956522	973.79347826087	869.695652173913	1018.3152173913	917.565217391304	960.945652173913	807.315217391304	949.663043478261	1040.30434782609	1011.41304347826	825.760869565217	954.397904347826	0.872319697382226
COQ5	1426.4347826087	1477.78260869565	1351.84782608696	1385.23913043478	1341.58695652174	1488.89130434783	1364.82608695652	1454.79347826087	1189.45652173913	1392.61956521739	1369.25	1155.08695652174	1068.95652173913	1122.10869565217	1127.22826086957	990.108695652174	1209.64130434783	1177.58695652174	1009.9347826087	1009.0652173913	1284.13043478261	1291.36956521739	1283.76086956522	1143.86956521739	1245.10869565217	1264.75	1247.84782608696	1323.5652173913	1231.1847826087	1170.69565217391	1480.4347826087	1420.08695652174	1348.34782608696	1264.75	1382.0652173913	1413.73913043478	1464.96739130435	1401.95652173913	1327.21739130435	1271.41304347826	1286	1492.89130434783	1083.54347826087	1657.71739130435	1527.23913043478	1476.45652173913	1302.12077608696	0.30371772013603
GSPT2	486.565217391304	408.5	398.45652173913	497.673913043478	387.45652173913	429.5	423.184782608696	593.445652173913	414.934782608696	450.923913043478	441.260869565217	435.673913043478	381.032608695652	341.5	405.152173913044	412.45652173913	379.195652173913	366.54347826087	354.04347826087	453.021739130435	349.326086956522	377.934782608696	359.576086956522	450.130434782609	413.391304347826	359.434782608696	498.04347826087	374.70652173913	346.826086956522	441.608695652174	474.217391304348	479.130434782609	433.826086956522	484.673913043478	418.869565217391	362.891304347826	461.663043478261	537.086956521739	397.010869565217	424.304347826087	446.260869565217	580.315217391304	442.934782608696	527.869565217391	493.163043478261	515.608695652174	432.854917391304	0.295828306782359
EEF1E1	994.608695652174	992.54347826087	884.521739130435	1384.17391304348	816.217391304348	892.086956521739	859.086956521739	1504.54347826087	755.521739130435	1002.8152173913	1392.96739130435	1318.21739130435	940.54347826087	711.130434782609	1040.69565217391	1239.35869565217	1041.04347826087	734.326086956522	1058.71739130435	1279.75	1048.21739130435	904.608695652174	1068.42391304348	1278.26086956522	996.010869565218	1006.9347826087	1387.65217391304	811.021739130435	1141.39130434783	1257.34782608696	809.565217391304	822.217391304348	744.652173913044	1244.73913043478	855.79347826087	469.217391304348	694.717391304348	1316.5	721.934782608696	570.684782608696	638.315217391304	1300.21739130435	474.521739130435	927.663043478261	846.923913043478	1343.76086956522	989.655669565217	0.292122882576362
TBL3	459.880434782609	450.130434782609	494.717391304348	299.663043478261	460.065217391304	447.336956521739	528.434782608696	241.413043478261	513.336956521739	466.804347826087	373.369565217391	339.152173913044	539.630434782609	507.239130434783	454.304347826087	327.739130434783	403.858695652174	525.086956521739	415.652173913044	319.489130434783	497.804347826087	456.934782608696	346.739130434783	329.565217391304	356.902173913044	442.108695652174	305.608695652174	430.369565217391	346.826086956522	299.95652173913	481.586956521739	462.29347826087	493.032608695652	324.108695652174	468.45652173913	572.152173913044	453.239130434783	313.673913043478	489.565217391304	525.717391304348	515.391304347826	314.369565217391	531.771739130435	425.760869565217	357.967391304348	283.45652173913	421.57962826087	0.97687043522354
HACD1	704.29347826087	709.369565217391	617.54347826087	920.826086956522	609.684782608696	666.391304347826	594.630434782609	991.804347826087	755.521739130435	772.369565217391	852.152173913044	894.326086956522	709.608695652174	725.608695652174	1003.23913043478	782.478260869565	777.434782608696	599.630434782609	892.173913043478	828.369565217391	801.989130434783	707.95652173913	786.239130434783	811.239130434783	741.739130434783	777.086956521739	833.695652173913	704.586956521739	845.489130434783	860.728260869565	717.565217391304	720.326086956522	668	830.25	667.347826086957	573.304347826087	619.79347826087	852.065217391304	758.195652173913	851.152173913044	784.413043478261	824.630434782609	922.641304347826	793.206521739131	798.902173913044	889.173913043478	772.808126086957	0.708269709200534
MORC2	838.086956521739	829.347826086957	935.326086956522	973.130434782609	914.978260869565	895.934782608696	900.619565217391	1012.5652173913	663.521739130435	800.782608695652	797.478260869565	767.239130434783	666.902173913044	722.75	700.239130434783	732.239130434783	606.402173913044	648.402173913044	687.554347826087	684.086956521739	596.402173913044	654.847826086957	700.597826086957	681.326086956522	701.978260869565	693.869565217391	683.760869565217	684.891304347826	570.195652173913	684.652173913044	797.478260869565	802.369565217391	919	842.630434782609	840.336956521739	855.79347826087	765.586956521739	926.04347826087	828.521739130435	792.391304347826	831.695652173913	942.717391304348	797.728260869565	860.847826086957	928.978260869565	927.5	784.559315217391	0.61243095751814
ESCO1	848.695652173913	893.456521739131	880.663043478261	951.369565217391	830.728260869565	899.673913043478	827.956521739131	1071.15217391304	873.021739130435	1000.44565217391	956.434782608696	972.934782608696	733.29347826087	727.130434782609	751.858695652174	849.097826086956	814.95652173913	844.347826086957	719	901.097826086957	770.95652173913	853.521739130435	796.565217391304	948.239130434783	920.347826086956	786.369565217391	988.282608695652	878.706521739131	773.913043478261	957.347826086957	846.195652173913	949.804347826087	914.478260869565	883.978260869565	776.326086956522	627.869565217391	758.554347826087	962.652173913044	875.086956521739	693.369565217391	786.369565217391	1077.94565217391	788.173913043478	961.282608695652	836.978260869565	965.065217391304	863.602089130435	0.82327002580343
BTBD10	1028.46739130435	977.228260869565	938.065217391304	888.380434782609	923.95652173913	937.434782608696	972.804347826087	902.347826086956	1198.45652173913	994.304347826087	1016.95652173913	874.934782608696	1255.0652173913	1014.02173913043	849.54347826087	809.673913043478	982.5	1066.86956521739	877.130434782609	773.597826086957	1069.14130434783	969.402173913043	1012.16304347826	770.695652173913	902.902173913044	933.478260869565	789.565217391304	975.804347826087	883.456521739131	814.304347826087	995.565217391304	896.923913043478	936.510869565217	934.304347826087	1169.39130434783	1056.89130434783	1006.19565217391	893.989130434783	905.152173913043	892.434782608696	900.619565217391	895.782608695652	941.119565217391	892.54347826087	865.304347826087	948.239130434783	946.383039130435	0.606744119727504
TNRC18	1249.95652173913	1160.03260869565	1699.02173913043	1241.30434782609	1468.88043478261	1235.21739130435	1630.45652173913	1119.36956521739	1080.96739130435	1123.5652173913	889.173913043478	1146.01086956522	1103.94565217391	1204.1847826087	1248.89130434783	1028.84782608696	1031.5	1186.15217391304	1315.5652173913	996.608695652174	1004.45652173913	1148.10869565217	1146.52173913043	1046.46739130435	1217.54347826087	1240.84782608696	932.717391304348	1256.28260869565	1110.34782608696	1135.46739130435	1215.05434782609	1266.34782608696	1451.86956521739	1186.02173913043	1277.55434782609	1274.89130434783	1210.52173913043	1124.45652173913	1105.42391304348	1534.80434782609	1379.36956521739	1089.19565217391	1212.83695652174	931.804347826087	1027.67391304348	1097.69565217391	1190.95515869565	0.714893838837107
MT-ND6	1148.67391304348	732.086956521739	1633.80434782609	809.673913043478	947.923913043478	827.097826086957	1229.86956521739	738.413043478261	854.195652173913	742.086956521739	1034.4347826087	803.04347826087	796.434782608696	858.152173913044	1046.63043478261	621.391304347826	719.978260869565	989.108695652174	1117.80434782609	720.684782608696	855.673913043478	937.434782608696	776.391304347826	577.717391304348	897.739130434783	825.608695652174	694.021739130435	940.934782608696	836.413043478261	949.521739130435	993.478260869565	881.891304347826	960.304347826087	741.380434782609	836.836956521739	1149.45652173913	827.673913043478	794.576086956522	802.228260869565	1214.33695652174	1002.47826086957	879.336956521739	849.804347826087	684.891304347826	1134.1847826087	821.369565217391	896.460306521739	0.873110250020673
HDHD2	881.228260869565	1029.23913043478	1030.98913043478	1115.82608695652	963.521739130435	1208.76086956522	964.608695652174	939.673913043478	1093.47826086957	783.076086956522	667.630434782609	827.358695652174	1028.30434782609	1131.10869565217	1085.65217391304	952.913043478261	1038.90217391304	1017.4347826087	1220.63043478261	993.478260869565	1021.79347826087	1150.82608695652	922.086956521739	992.54347826087	977.413043478261	1005.27173913043	734.326086956522	1020.39130434783	1075.36956521739	1057.39130434783	1051.33695652174	925.04347826087	974.108695652174	1214.64130434783	1013.88043478261	810	1127.59782608696	1169.54347826087	1043.19565217391	1274.47826086957	1095.4347826087	1002.47826086957	1190.30434782609	905.934782608696	1138.73913043478	1093.78260869565	1020.90708043478	0.30802712777071
ORMDL3	553.076086956522	465.79347826087	533.586956521739	432.391304347826	534.315217391304	459.880434782609	514.478260869565	440.989130434783	542.54347826087	554.04347826087	581.315217391304	498.130434782609	542.79347826087	554.79347826087	514.119565217391	453.75	521.130434782609	517.728260869565	506.608695652174	450.065217391304	546.728260869565	473.673913043478	505.076086956522	456.065217391304	476.54347826087	463.826086956522	476.608695652174	522.380434782609	420.869565217391	420.434782608696	480.434782608696	554.239130434783	469.130434782609	421.717391304348	607.195652173913	568.369565217391	483.804347826087	442.413043478261	575.75	507.141304347826	626.413043478261	459.239130434783	627.554347826087	529.521739130435	501.434782608696	494.586956521739	506.14532173913	0.600046737493069
DDAH1	856.173913043478	648.5	701.913043478261	879.902173913044	615.336956521739	634.413043478261	711.271739130435	945.206521739131	946.586956521739	679.054347826087	768.913043478261	769.739130434783	1169.22826086957	544.413043478261	798.065217391304	729.619565217391	888.217391304348	689	797.956521739131	715.119565217391	884.521739130435	759.54347826087	805.695652173913	812.576086956522	800.152173913044	788.5	883.260869565218	757.239130434783	852.065217391304	790.510869565217	754.304347826087	749.108695652174	832.271739130435	926.956521739131	1110.94565217391	570.978260869565	859.260869565217	827.45652173913	712.739130434783	685.869565217391	851.152173913044	1062.89130434783	754.217391304348	703.79347826087	876.95652173913	1108.21739130435	804.561184782609	0.416009466621287
CHD2	1112.10869565217	1127.92391304348	1418.86956521739	1288.38043478261	1499.6847826087	1175.17391304348	1151.76086956522	1304.13043478261	922.369565217391	1227.15217391304	1244.02173913043	1374.82608695652	922.891304347826	1072.8152173913	1160.03260869565	1160.69565217391	913.391304347826	1174.98913043478	1169.39130434783	1194.26086956522	875.369565217391	1054.65217391304	922.086956521739	1037.47826086957	1059.60869565217	1056.54347826087	1181.02173913043	1028.84782608696	1046.46739130435	1138.47826086957	1168	1204.60869565217	1186.28260869565	1248.89130434783	1150.82608695652	1414.97826086957	1172.19565217391	1172.19565217391	1242.26086956522	1630.82608695652	1486.9347826087	1348.34782608696	1502.4347826087	1310.30434782609	1499.17391304348	1266.58695652174	1196.09288695652	0.280674532404896
INPP5K	774	763.076086956522	666.391304347826	628.25	658.423913043478	771.434782608696	757.5	604.945652173913	797.728260869565	700.847826086957	623.217391304348	589.489130434783	771.076086956522	807.79347826087	811.130434782609	604.195652173913	729.402173913044	719.347826086957	736.108695652174	546.728260869565	729.402173913044	793.630434782609	667.239130434783	555.423913043478	726.989130434783	711.271739130435	519.891304347826	776.021739130435	665.163043478261	599.521739130435	729.173913043478	738.586956521739	803.913043478261	660.021739130435	867.04347826087	1035.33695652174	956.173913043478	612.260869565218	829.95652173913	892.434782608696	923.021739130435	611.510869565217	907.304347826087	790.413043478261	840.097826086956	640.695652173913	731.382321739131	0.280674532404896
PRKACA	1001.11956521739	890.434782608696	912.413043478261	758.739130434783	1075.25	889.29347826087	995.891304347826	719.195652173913	1072.48913043478	982.5	839.782608695652	750.586956521739	1100.82608695652	1124.45652173913	978.717391304348	794.239130434783	934.760869565218	987.206521739131	943.445652173913	745.04347826087	990.369565217391	883.880434782609	831.097826086957	801.239130434783	904.065217391304	864.282608695652	702.891304347826	912.29347826087	853.608695652174	739.565217391304	896.923913043478	819.5	988.782608695652	781.967391304348	998.347826086957	1027.91304347826	981.369565217391	748.695652173913	991.478260869565	935.836956521739	1041.6847826087	741.739130434783	1152.9347826087	990.586956521739	893.989130434783	793.086956521739	907.924413043478	0.893131383311811
KLHDC3	805.456521739131	882.54347826087	833.304347826087	928.260869565217	809.304347826087	940.347826086957	874.217391304348	905.934782608696	852.891304347826	1072.15217391304	861.847826086957	668.456521739131	765.847826086957	850.521739130435	746.739130434783	705.521739130435	893.217391304348	807.315217391304	747.902173913044	682.45652173913	907.304347826087	752.652173913044	866.684782608696	599.804347826087	894.858695652174	763.739130434783	637.108695652174	820.652173913044	799.04347826087	787.847826086957	807.95652173913	736.673913043478	794.902173913044	778.076086956522	672.739130434783	892.086956521739	903.217391304348	848.565217391304	818.586956521739	751.586956521739	757.804347826087	843.95652173913	748.217391304348	902.347826086956	879.782608695652	830.565217391304	813.717380434783	0.688956493998473
RARG	547.521739130435	707.760869565217	706.423913043478	605.021739130435	634.413043478261	692.45652173913	701.978260869565	622.608695652174	535.934782608696	520.684782608696	409.717391304348	499.076086956522	480.54347826087	476.608695652174	481.358695652174	493.565217391304	499.456521739131	548.369565217391	476.326086956522	497	497.804347826087	541.282608695652	493.5	498.130434782609	524.130434782609	522.565217391304	430.304347826087	560.086956521739	495.771739130435	460.423913043478	562.25	619.934782608696	591.521739130435	633.239130434783	575.021739130435	668.858695652174	780.95652173913	586.826086956522	665.260869565217	750.282608695652	714.5	580.315217391304	759.869565217391	675.967391304348	636.130434782609	578.826086956522	576.969276086957	0.280674532404896
CD2BP2	792.782608695652	699.826086956522	700.717391304348	579.565217391304	573.565217391304	604.347826086957	713.95652173913	574.358695652174	718.347826086957	759.434782608696	685.282608695652	626.108695652174	765.847826086957	744.065217391304	616.347826086957	615.478260869565	624.369565217391	763.336956521739	607.576086956522	595.228260869565	706.217391304348	724.532608695652	651.554347826087	586.434782608696	745.760869565217	637.032608695652	606.260869565218	691.695652173913	579.934782608696	545.326086956522	667.108695652174	665.521739130435	602.728260869565	580.913043478261	731.152173913044	778.076086956522	605.978260869565	546.336956521739	689.173913043478	724.413043478261	739.04347826087	504.815217391304	681.326086956522	598.673913043478	653.913043478261	516.652173913044	654.80695	0.51787426222086
TBL2	957.532608695652	820.489130434783	964.228260869565	918.021739130435	922.760869565217	793.326086956522	971.913043478261	995.076086956522	772.891304347826	853.521739130435	1066.66304347826	1010.28260869565	750.923913043478	782.391304347826	859.673913043478	1007.69565217391	849.54347826087	768.652173913044	825.684782608696	954.717391304348	831.826086956522	781.54347826087	873.239130434783	998.347826086957	927.217391304348	805.25	1175.76086956522	936.869565217391	816.119565217391	851.619565217391	916.619565217391	1012.73913043478	826.282608695652	756.195652173913	851.45652173913	801.891304347826	774	852.065217391304	877.847826086957	798.326086956522	867.04347826087	977.510869565217	829.95652173913	926.04347826087	888.380434782609	846.358695652174	883.619582608696	0.593754333164763
SETDB1	737.195652173913	760.739130434783	794.717391304348	694.173913043478	797.847826086957	833.695652173913	755.358695652174	665.065217391304	714.717391304348	871.54347826087	777.95652173913	578.065217391304	713.097826086957	940.79347826087	812.576086956522	670.434782608696	694.434782608696	889.29347826087	782.695652173913	640.695652173913	737.108695652174	819.5	751.489130434783	605.119565217391	862.695652173913	755.358695652174	605.119565217391	780.608695652174	762.152173913044	671.586956521739	813.804347826087	815.478260869565	882.923913043478	723.54347826087	822.065217391304	976.554347826087	939.173913043478	711.347826086957	820.489130434783	990.478260869565	814.04347826087	641.891304347826	905.576086956522	870.141304347826	791.804347826087	645.782608695652	774.802934782609	0.318564595977545
SIGMAR1	1120.91304347826	1082.15217391304	1149.97826086957	1207.5	1049.15217391304	1102.19565217391	1170.1847826087	1083.76086956522	1140.28260869565	984.380434782609	1044.21739130435	1254.92391304348	1124.45652173913	1581.26086956522	1693.6847826087	1339.59782608696	1161.08695652174	1275.10869565217	1428.67391304348	1130.84782608696	1156.4347826087	1142.86956521739	1121.22826086957	1148.67391304348	1052.52173913043	1183.10869565217	1067.01086956522	1127.92391304348	1189.45652173913	1122.4347826087	1127.22826086957	1161.46739130435	1216.73913043478	1149.13043478261	1167.80434782609	1305.58695652174	1202.98913043478	1050.27173913044	1266.34782608696	1692.19565217391	1582.75	923.95652173913	2027.9347826087	994.913043478261	1055.58695652174	957.228260869565	1202.56859130435	0.593678298366017
CMC1	1009.0652173913	1079.70652173913	996.130434782609	938.391304347826	973.95652173913	1135.0652173913	891.336956521739	996.771739130435	843.804347826087	1131.76086956522	937.434782608696	760.45652173913	744.152173913044	617.902173913044	590.891304347826	770.29347826087	832.945652173913	704.5	530.326086956522	817.326086956522	887.630434782609	858.467391304348	814.630434782609	787.45652173913	868.336956521739	715.45652173913	901.847826086957	922.891304347826	832.826086956522	878.076086956522	819	891.021739130435	763.739130434783	939.54347826087	695.434782608696	658.021739130435	765.586956521739	965.065217391304	791.913043478261	473.434782608696	490.880434782609	992.260869565217	536.956521739131	985.326086956522	990.934782608696	966.847826086956	836.865313043478	0.31185670958239
SLC9A1	379.391304347826	336.597826086957	375.75	380.869565217391	388.54347826087	304.782608695652	371.45652173913	376.695652173913	629.163043478261	397.260869565217	419.173913043478	453.130434782609	574.130434782609	527.891304347826	589.565217391304	541.163043478261	625.95652173913	553.021739130435	709.891304347826	515.391304347826	596.402173913044	586.173913043478	624.467391304348	567.630434782609	625.891304347826	639.326086956522	609.282608695652	589.717391304348	576.782608695652	583.347826086957	527.228260869565	572.826086956522	569.804347826087	429.902173913044	556.282608695652	590.228260869565	490.717391304348	398.739130434783	503.054347826087	547.521739130435	552.347826086957	443.565217391304	479.336956521739	396	442.173913043478	448.173913043478	508.624993478261	0.563639087549767
RUVBL1	1542.67391304348	1420.08695652174	1462.77173913043	1352	1393.76086956522	1427.41304347826	1508.32608695652	1331.52173913043	1555.26086956522	1578.23913043478	1598.5	1307.13043478261	1470.45652173913	1698.0652173913	1621.86956521739	1389.46739130435	1473.5	1529.02173913043	1620.67391304348	1296.5	1721.65217391304	1391.91304347826	1341.34782608696	1291.60869565217	1372.41304347826	1370.60869565217	1362.97826086957	1412.52173913043	1389.01086956522	1273.4347826087	1519.32608695652	1365.52173913044	1474.23913043478	1262.02173913043	1466.08695652174	1547.41304347826	1348.5652173913	1271.17391304348	1572.82608695652	1536.41304347826	1529.60869565217	1388.09782608696	1645.71739130435	1267.75	1408.14130434783	1224.9347826087	1442.01232608696	0.593754333164763
CUL9	376.065217391304	402	416.652173913044	344.717391304348	406.586956521739	373.913043478261	432.663043478261	306.663043478261	405.739130434783	337.391304347826	340.641304347826	314.347826086957	350.586956521739	383.347826086957	392.423913043478	313.434782608696	324.347826086957	422.554347826087	435.739130434783	295.130434782609	269.478260869565	461.608695652174	325.826086956522	305.608695652174	413.391304347826	353.608695652174	281.95652173913	370.021739130435	343.891304347826	312.086956521739	376.239130434783	424.760869565217	419.260869565217	354.141304347826	431.326086956522	472.869565217391	383.79347826087	295.847826086957	386.891304347826	504.554347826087	391.836956521739	324.271739130435	480.847826086957	416.554347826087	419.804347826087	331.5	374.498339130435	0.35583317303918
RPL21	610.065217391304	600.315217391304	579.565217391304	525.967391304348	630.695652173913	598.423913043478	503.130434782609	612.608695652174	537.521739130435	774.760869565218	744.152173913044	803.04347826087	417.913043478261	358.467391304348	281.760869565217	663.934782608696	603.739130434783	471.445652173913	229.945652173913	949.391304347826	709.489130434783	502.978260869565	482.673913043478	796.695652173913	533.771739130435	484.217391304348	1194.95652173913	611.195652173913	478.369565217391	489.217391304348	562.25	463.652173913044	498.04347826087	430.45652173913	315.54347826087	416.695652173913	416.260869565217	507.239130434783	433.934782608696	257.717391304348	280.217391304348	583.804347826087	311.978260869565	555.586956521739	501.434782608696	501.434782608696	539.492693478261	0.280674532404896
TTC9C	438.086956521739	517.913043478261	456.782608695652	467.847826086957	385.163043478261	501.771739130435	459.717391304348	504.673913043478	520.195652173913	472.576086956522	525.217391304348	460.065217391304	480.54347826087	470.826086956522	424.880434782609	416.380434782609	410.380434782609	482.673913043478	362.326086956522	414.847826086957	470.902173913044	432.282608695652	436.576086956522	423.913043478261	467.847826086957	418.586956521739	440.119565217391	475.652173913044	486.5	478.445652173913	469.434782608696	523.826086956522	508.521739130435	460.152173913044	497.108695652174	552.021739130435	566.239130434783	433.108695652174	479.184782608696	447.79347826087	504.967391304348	496.304347826087	486.065217391304	442.54347826087	491.70652173913	466.804347826087	468.032132608696	0.430726130856519
TRMT10C	1036.94565217391	975.619565217391	948.239130434783	1144.39130434783	978.869565217391	940.347826086957	943.847826086957	1179.60869565217	811.021739130435	1002.8152173913	1022.97826086957	1215.89130434783	851.45652173913	827.097826086957	839.326086956522	1149.45652173913	948.891304347826	822.065217391304	821.108695652174	1169.0652173913	1002.28260869565	799.239130434783	954.576086956522	1079.0652173913	944.934782608696	924.597826086957	1259.51086956522	901.195652173913	1059.21739130435	1027.27173913043	877.413043478261	932.717391304348	876.695652173913	943.260869565217	804.45652173913	727.978260869565	912.532608695652	1110.58695652174	893.847826086957	765.413043478261	931.478260869565	1109.76086956522	805.369565217391	935.326086956522	865.304347826087	1067.47826086957	959.577265217391	0.352559049737776
PARVB	436.79347826087	459.586956521739	453.652173913044	380.108695652174	446.021739130435	411.652173913043	483	345.380434782609	455.5	409.565217391304	392.739130434783	512.271739130435	553.434782608696	629.619565217391	573.304347826087	496.760869565217	488.130434782609	572.630434782609	604.065217391304	479.771739130435	461.826086956522	511.858695652174	470.75	460.239130434783	466.478260869565	539.630434782609	415.184782608696	501.478260869565	397.804347826087	410.434782608696	477.923913043478	459.913043478261	583.347826086957	443.282608695652	560.086956521739	530.206521739131	514.95652173913	399.663043478261	461.217391304348	548.934782608696	620.391304347826	381.54347826087	545.804347826087	444.369565217391	425.260869565217	407.630434782609	478.787093478261	0.761929289637437
TXNL4A	969.54347826087	899.119565217391	880.663043478261	848.95652173913	1005.41304347826	904.065217391304	1011.57608695652	824.369565217391	1116.39130434783	1019.80434782609	914.304347826087	939.358695652174	1131.57608695652	1096.71739130435	1024.85869565217	940.54347826087	1061.75	1079.19565217391	926.347826086957	924.739130434783	1104.78260869565	950.239130434783	937.869565217391	918.652173913044	813.804347826087	996.934782608696	781.967391304348	942.304347826087	903.065217391304	855	916.619565217391	812.434782608696	873.967391304348	946.423913043478	1016.63043478261	1030.23913043478	898.858695652174	837.934782608696	981.065217391304	911.086956521739	925.652173913043	791	1055.95652173913	850.391304347826	869.434782608696	837.076086956522	940.840967391304	0.309344296585431
PPP1R16A	475.326086956522	487.032608695652	418.913043478261	370.130434782609	377.739130434783	386.891304347826	510.228260869565	334.413043478261	421.989130434783	497.586956521739	423.695652173913	328.989130434783	409.206521739131	405.152173913044	381.663043478261	340.380434782609	347.010869565217	437.978260869565	359.065217391304	305.413043478261	488.826086956522	453.913043478261	350	294.967391304348	366.108695652174	311.586956521739	272.173913043478	353.108695652174	352.130434782609	291.95652173913	440.239130434783	342.804347826087	354.304347826087	391.239130434783	415.217391304348	442.934782608696	408.804347826087	322.130434782609	337.782608695652	428.804347826087	400.315217391304	283.282608695652	475.913043478261	377.195652173913	360.608695652174	288.380434782609	383.120263043478	0.369822153350424
MRPL57	850.173913043478	861.173913043478	713.195652173913	733.369565217391	855.554347826087	802.086956521739	764.967391304348	750.282608695652	863.673913043478	904.065217391304	809.673913043478	563.152173913044	762.95652173913	787.282608695652	753.195652173913	596	814.95652173913	782.826086956522	668.652173913044	658.5	907.304347826087	655.597826086957	845.391304347826	638.239130434783	615.565217391304	745.586956521739	598.576086956522	753.195652173913	705.706521739131	660.369565217391	772.54347826087	676.989130434783	691.45652173913	677.826086956522	772.717391304348	908.326086956522	825.684782608696	689.54347826087	774.413043478261	548.934782608696	637.032608695652	640.434782608696	651.326086956522	849.391304347826	695.217391304348	766.608695652174	739.124293478261	0.35583317303918
GLYR1	1084.71739130435	1046.89130434783	1026.36956521739	981.739130434783	1163.86956521739	991.934782608696	1147.54347826087	979.413043478261	1251.39130434783	1115.82608695652	1069.32608695652	944.065217391304	1065.45652173913	1087.42391304348	1017.30434782609	923.326086956522	1022.23913043478	1228.9347826087	1012.91304347826	931.923913043478	997.380434782609	1038.90217391304	958.836956521739	958.652173913043	960.456521739131	1016.34782608696	1043.58695652174	1062.75	987.065217391304	897.989130434783	1111.0652173913	1106.54347826087	1088.86956521739	954.010869565218	1157.95652173913	1383.17391304348	1101.85869565217	983.260869565217	1088.72826086957	1155.08695652174	1171.5	1048.64130434783	1187.30434782609	1180.51086956522	1035.71739130435	944.369565217391	1058.98201956522	0.467615375070118
RETREG2	1355.72826086957	1225.69565217391	1220.63043478261	1127.59782608696	1121.65217391304	1149.26086956522	1207.5	1082.95652173913	1171.66304347826	1082.5652173913	1207	1096.84782608696	1130.42391304348	1273.21739130435	1110.58695652174	1047.34782608696	1063.69565217391	1236.27173913043	1163.73913043478	1045.80434782609	1110.20652173913	1141.61956521739	1095.76086956522	1041.41304347826	1149.13043478261	1078.80434782609	1125.65217391304	1157.58695652174	1086.47826086957	1052.52173913043	1101.67391304348	1233.47826086957	1232.26086956522	1054.79347826087	1195.16304347826	1299.30434782609	1129.47826086957	1024.69565217391	1051.52173913043	1264.30434782609	1259.23913043478	1073.32608695652	1281.76086956522	1264.04347826087	1171.5	1056.89130434783	1148.97373913044	0.872319697382226
ETFDH	466.902173913044	435.076086956522	408.065217391304	445.728260869565	416.380434782609	434.619565217391	450.45652173913	433.5	540.956521739131	387	450.630434782609	354.695652173913	524.565217391304	463.260869565217	461.902173913044	382.282608695652	423.184782608696	408.978260869565	443.413043478261	394.869565217391	480.434782608696	401.728260869565	449.141304347826	387.608695652174	361.173913043478	472.04347826087	342.489130434783	414.847826086957	417.054347826087	410.434782608696	421.434782608696	374.630434782609	408.597826086957	450.413043478261	464.021739130435	530.206521739131	461.663043478261	437.826086956522	440.521739130435	486.739130434783	482.20652173913	465.673913043478	488.521739130435	445.021739130435	417.554347826087	466.804347826087	437.070880434783	0.538027228094785
FAM220A	695.847826086957	639.95652173913	560.673913043478	538.891304347826	599.521739130435	630.619565217391	601.195652173913	534.945652173913	653.347826086957	631.369565217391	517.728260869565	696.630434782609	608.217391304348	560.195652173913	521.217391304348	692.826086956522	693.29347826087	651.391304347826	508.086956521739	734.956521739131	726.054347826087	662.95652173913	615.04347826087	661.228260869565	551.815217391304	596.282608695652	587.282608695652	714.717391304348	674.086956521739	615.945652173913	662.054347826087	648.304347826087	665.391304347826	653.021739130435	699.760869565217	588.391304347826	676.989130434783	602.282608695652	538.326086956522	511.173913043478	518.641304347826	632.434782608696	505.739130434783	581.086956521739	566.434782608696	741.608695652174	618.868858695652	0.854761287454209
KLF16	588.260869565217	506.5	500.717391304348	472.521739130435	513.336956521739	440.065217391304	544.478260869565	456.304347826087	586.673913043478	440.413043478261	438.467391304348	446.336956521739	571.510869565217	511.826086956522	491.369565217391	484.521739130435	582.717391304348	563.630434782609	614.673913043478	463.739130434783	657.217391304348	514.119565217391	512.04347826087	583.695652173913	542.434782608696	594.478260869565	544.04347826087	532.260869565217	528.510869565217	522.739130434783	520.54347826087	493.163043478261	562.25	413.152173913044	461.717391304348	495.717391304348	439.282608695652	432.195652173913	424.152173913043	428.804347826087	555.54347826087	429.45652173913	405.978260869565	436.347826086957	458.04347826087	430.652173913044	502.969760869565	0.280674532404896
NOP53	998.065217391304	855.79347826087	949.391304347826	558.630434782609	881.565217391304	827.097826086957	913.913043478261	549.29347826087	786.304347826087	749.184782608696	740.260869565217	617.54347826087	679.521739130435	901.097826086957	622	609.586956521739	789.434782608696	903.673913043478	714.173913043478	629.913043478261	882.391304347826	804.79347826087	705.054347826087	598.282608695652	831.826086956522	801.891304347826	659.728260869565	879.902173913044	741.282608695652	642.586956521739	858.467391304348	840.695652173913	871.097826086957	592.858695652174	792.391304347826	1050.10869565217	748.369565217391	548.217391304348	828.521739130435	860.141304347826	779	549.923913043478	788.173913043478	814.304347826087	816.119565217391	523.04347826087	762.730865217391	0.872319697382226
RAB28	444.076086956522	455.152173913044	428.358695652174	528.586956521739	443.282608695652	485.304347826087	402.597826086957	568.641304347826	460.586956521739	524.5	499.195652173913	448.934782608696	398.652173913044	362.326086956522	330.902173913044	420.478260869565	434.304347826087	400.847826086957	341.152173913044	456.782608695652	420.478260869565	450.336956521739	440	474.913043478261	406.663043478261	376.304347826087	425.489130434783	384.597826086957	452.934782608696	470.902173913044	426.434782608696	441.04347826087	391.836956521739	503.456521739131	373.608695652174	353.065217391304	383.79347826087	514.95652173913	383.402173913044	279.423913043478	342.054347826087	493.673913043478	303.032608695652	490.989130434783	397.065217391304	519.956521739131	429.023393478261	0.29937308481829
ZEB1	1161.83695652174	1354.32608695652	1313.52173913043	1499.4347826087	1167	1356.02173913043	1220.54347826087	1601.17391304348	830.456521739131	1135.46739130435	1190.71739130435	1342.89130434783	925.771739130435	814.173913043478	892.086956521739	1125.03260869565	938.391304347826	820.489130434783	953.239130434783	1051.15217391304	918.021739130435	955.630434782609	1013.73913043478	1092.07608695652	962.826086956522	960.304347826087	1113.04347826087	893.717391304348	1003.48913043478	1018.69565217391	1016.02173913043	951.95652173913	1043.72826086957	1221.08695652174	959.489130434783	792.934782608696	1060.33695652174	1304.32608695652	960.728260869565	835.021739130435	963.347826086956	1222.14130434783	752.902173913044	1079.91304347826	1119.25	1246.26086956522	1068.58078043478	0.280674532404896
TBCEL	396.79347826087	431.586956521739	494.717391304348	647.195652173913	548.804347826087	479.565217391304	486.565217391304	644.326086956522	482.423913043478	531.956521739131	625.891304347826	649.586956521739	487.663043478261	481.065217391304	580.804347826087	669.271739130435	560.869565217391	496.304347826087	622.086956521739	632.152173913044	497.804347826087	492.652173913044	590.978260869565	649.478260869565	520.989130434783	529.217391304348	713.195652173913	531.195652173913	527.228260869565	631.5	518.304347826087	451.228260869565	488.45652173913	619.195652173913	428.673913043478	390.239130434783	475.326086956522	565.630434782609	506.782608695652	448.869565217391	450.630434782609	689.086956521739	528.510869565217	492.021739130435	481.75	560.771739130435	537.594519565217	0.596228209420308
CENPT	559.130434782609	539.847826086957	497.989130434783	458.521739130435	406.586956521739	457.130434782609	475.804347826087	451.445652173913	506.782608695652	556.847826086957	582.326086956522	377.934782608696	484.282608695652	482.423913043478	440.521739130435	445.728260869565	545.54347826087	576.695652173913	439.652173913044	435.45652173913	534.04347826087	511.858695652174	477.978260869565	425	516.782608695652	416.695652173913	470.369565217391	520.826086956522	516.717391304348	469.380434782609	508.086956521739	496.391304347826	471.728260869565	497.673913043478	541.630434782609	553.434782608696	497.369565217391	485.304347826087	403.521739130435	529.326086956522	514.119565217391	380.913043478261	470.826086956522	567.173913043478	555.5	384.95652173913	487.788280434783	0.96137973580751
ACVR2A	370.413043478261	372.445652173913	387.79347826087	396.130434782609	413.54347826087	413.586956521739	350.478260869565	406.815217391304	355.760869565217	395.782608695652	402.717391304348	362.076086956522	356.695652173913	358.467391304348	342.054347826087	336.25	344.434782608696	318.217391304348	330.652173913044	385.695652173913	388.782608695652	336.347826086957	361.065217391304	396.130434782609	429	318.021739130435	406.076086956522	367.608695652174	391.673913043478	392.521739130435	360.717391304348	338.782608695652	350.086956521739	375.880434782609	345.380434782609	339.739130434783	356.391304347826	432.195652173913	378.130434782609	353.5	317.869565217391	455.760869565217	314.369565217391	361.673913043478	384.923913043478	423.391304347826	371.218102173913	0.872319697382226
MRPL30	774	857.195652173913	843.239130434783	948.54347826087	819	917.923913043478	826.804347826087	932.717391304348	751.934782608696	742.086956521739	891.565217391304	1065.98913043478	768.913043478261	816.782608695652	755.597826086957	1086.80434782609	996.130434782609	804.032608695652	703.717391304348	1162.02173913043	920.010869565217	707.95652173913	889.673913043478	1081.29347826087	815.336956521739	910.608695652174	1087.30434782609	871.695652173913	880.326086956522	936.369565217391	800.152173913044	830.728260869565	873.347826086957	935.934782608696	658.130434782609	703.054347826087	884.195652173913	1016.02173913043	931.923913043478	703.217391304348	829.347826086957	1016.02173913043	807.315217391304	863.195652173913	845.021739130435	944.369565217391	874.077258695652	0.893131383311811
CEP41	477.869565217391	589.869565217391	516.413043478261	565.065217391304	502.445652173913	599.956521739131	516.782608695652	574.358695652174	393.380434782609	480.847826086957	460.152173913044	538.391304347826	382.739130434783	425.760869565217	444.739130434783	527.869565217391	467.989130434783	464.391304347826	481.586956521739	529.739130434783	422.782608695652	423.336956521739	448.369565217391	462.826086956522	427.858695652174	397.260869565217	461.358695652174	372.239130434783	391.673913043478	448	408.695652173913	439.934782608696	507.239130434783	533.695652173913	350.239130434783	426.369565217391	448.456521739131	551.554347826087	468.380434782609	426.152173913044	459.880434782609	514.326086956522	427.75	472.576086956522	455.260869565217	454.065217391304	468.274576086957	0.280674532404896
METTL3	1392.4347826087	1383.82608695652	1369.25	1232.10869565217	1221.8152173913	1369.45652173913	1359.29347826087	1255.0652173913	1264.9347826087	1405.30434782609	1347.01086956522	1087.70652173913	1301.47826086957	1430.71739130435	1130.97826086957	1157.58695652174	1179.77173913044	1461.60869565217	1164.73913043478	1108.02173913043	1254.92391304348	1311.60869565217	1293.76086956522	1024.69565217391	1327	1172.83695652174	1094.80434782609	1286	1295.55434782609	1060.02173913043	1284.69565217391	1349.61956521739	1196.45652173913	1246.26086956522	1195.16304347826	1518.02173913043	1303.9347826087	1282.86956521739	1351.19565217391	1278.02173913044	1357.63043478261	1123.97826086957	1304.82608695652	1334.58695652174	1214.45652173913	1100.82608695652	1264.9317826087	0.797625036728949
TCTN1	510.032608695652	611.282608695652	631	616.79347826087	566.130434782609	662.369565217391	556.347826086957	649.130434782609	499.913043478261	618	627.304347826087	712.869565217391	472.04347826087	679.108695652174	543.913043478261	696.630434782609	592.413043478261	589.717391304348	549.847826086957	729.869565217391	592.586956521739	569.5	579.271739130435	626.239130434783	569.195652173913	562.152173913044	694.021739130435	572.04347826087	458.913043478261	586.673913043478	505.586956521739	565.065217391304	631.239130434783	560.413043478261	476.54347826087	553.434782608696	602.934782608696	634.086956521739	574.45652173913	570.684782608696	547.826086956522	525.717391304348	501.239130434783	614.565217391304	669.630434782609	531.04347826087	586.7344	0.352559049737776
FBXW5	1492.41304347826	1401.76086956522	1407.91304347826	1100.38043478261	1304.13043478261	1344.65217391304	1576.21739130435	1033.33695652174	1551.4347826087	1386.9347826087	1213.17391304348	1166.8152173913	1758.91304347826	1699.60869565217	1737.10869565217	1437.21739130435	1616.78260869565	1755.19565217391	1685.71739130435	1339.39130434783	1730.63043478261	1663.8152173913	1411.65217391304	1373.4347826087	1529.02173913043	1722.66304347826	1197.25	1699.89130434783	1684.04347826087	1280.30434782609	1596.60869565217	1406.97826086957	1446.66304347826	1266.58695652174	1675.75	1676.98913043478	1589.28260869565	1017.30434782609	1514.97826086957	1651.17391304348	1585.28260869565	1029.82608695652	1615.52173913043	1420.22826086957	1351.03260869565	1164.19565217391	1463.26532608696	0.913301366037792
RRP1	718.239130434783	664.260869565218	677.326086956522	560.304347826087	697.239130434783	599.956521739131	694.54347826087	543.04347826087	851.043478260869	803.75	797.478260869565	493.336956521739	821.673913043478	891.565217391304	844.065217391304	518.076086956522	817.739130434783	864.195652173913	822.456521739131	487.95652173913	932.923913043478	705.413043478261	705.054347826087	435.076086956522	675.891304347826	774.891304347826	447.673913043478	710.913043478261	644.956521739131	572.934782608696	744.913043478261	630.54347826087	653.347826086957	576.565217391304	627.630434782609	807.456521739131	627.391304347826	509.065217391304	754.782608695652	740.945652173913	743.413043478261	454.739130434783	860.847826086957	554.869565217391	561.608695652174	471.673913043478	675.951552173913	0.533019983439541
NDUFS2	1403.22826086957	1182.9347826087	1211.91304347826	1024.85869565217	1286	1175.17391304348	1184.27173913044	995.076086956522	1213.58695652174	1318.39130434783	1302.73913043478	1143.26086956522	1256.08695652174	1180.63043478261	1163.73913043478	1172.19565217391	1057.25	1302.05434782609	1137.47826086957	987.347826086956	1190.14130434783	1181.63043478261	1101.57608695652	1023.13043478261	1196.23913043478	1087.05434782609	1039.95652173913	1326.53260869565	1072.8152173913	1012.73913043478	1227.58695652174	1273.08695652174	1267.89130434783	999.260869565217	1330.45652173913	1337.23913043478	1176.27173913044	991.195652173913	1214.82608695652	1340.26086956522	1346.28260869565	1093.63043478261	1464.23913043478	1416.13043478261	1249.78260869565	1102.89130434783	1190.45790217391	0.411178312138894
MAIP1	996.010869565218	926.956521739131	871.380434782609	1099	922.760869565217	899.673913043478	848.95652173913	1131.39130434783	979.913043478261	1005.41304347826	1009.23913043478	954.434782608696	1034.60869565217	890.673913043478	861.695652173913	881.728260869565	975.804347826087	885.5	871.217391304348	942.108695652174	1020.54347826087	893.989130434783	934.108695652174	1008.96739130435	909	969.402173913043	1045.48913043478	911.184782608696	1046.46739130435	1094.47826086957	1001.11956521739	919.282608695652	992.826086956522	1238.80434782609	976.108695652174	751.858695652174	916.478260869565	1226.76086956522	997.695652173913	814.173913043478	821	1378.41304347826	948.141304347826	951.652173913044	976.673913043478	1388.76086956522	980.909704347826	0.375762543127703
DBR1	684.54347826087	717.565217391304	650	950.326086956522	640.326086956522	721.413043478261	707.858695652174	991.804347826087	849.097826086956	766.608695652174	868.413043478261	869.565217391304	674.554347826087	749.336956521739	750.347826086957	873.967391304348	835.021739130435	642.695652173913	819.826086956522	712.739130434783	734.173913043478	643.934782608696	700.597826086957	834.5	806.717391304348	740.260869565217	886.25	672.239130434783	778.076086956522	857.315217391304	616.869565217391	718.119565217391	741.184782608696	863.45652173913	656.739130434783	619.326086956522	732.347826086957	895.065217391304	690.695652173913	620.760869565217	670.065217391304	855.673913043478	662.369565217391	694.54347826087	708.576086956522	800.04347826087	753.824195652174	0.368101460265203
PCIF1	458.673913043478	458.771739130435	405.565217391304	329.04347826087	471.728260869565	449.086956521739	398.891304347826	337.25	477.304347826087	476.54347826087	415.304347826087	392.608695652174	502.630434782609	476.608695652174	448.869565217391	448.934782608696	452.173913043478	509.228260869565	433.402173913044	397.630434782609	466.565217391304	460.869565217391	426.478260869565	386.79347826087	471.195652173913	480.489130434783	427.04347826087	513.978260869565	424.913043478261	326.95652173913	493.79347826087	416.695652173913	376.847826086957	355.25	475.413043478261	561.608695652174	430.304347826087	331.173913043478	430.413043478261	471.913043478261	483.586956521739	326.673913043478	475.913043478261	420.760869565217	359.119565217391	329.782608695652	431.8431	0.717122838990659
DMTF1	885.336956521739	910.152173913044	1025.28260869565	1056.23913043478	1017.5652173913	1048.64130434783	960.728260869565	1007.9347826087	854.195652173913	934.20652173913	866.326086956522	828.836956521739	812.195652173913	820.184782608696	776.141304347826	831.097826086957	810.695652173913	965.989130434783	805.456521739131	1016.34782608696	723.673913043478	1004.33695652174	881.728260869565	889.413043478261	936.760869565217	706.978260869565	958.5	905.478260869565	864.108695652174	930.228260869565	912.532608695652	1025.91304347826	795.5	1045.32608695652	808.619565217391	838.771739130435	968.021739130435	1070.76086956522	888.04347826087	952.913043478261	907.956521739131	931.478260869565	967.347826086957	1163.73913043478	1057.91304347826	936.652173913044	919.701093478261	0.508274788764148
PSMC1	874.217391304348	815.739130434783	768.913043478261	754.304347826087	938.065217391304	838.304347826087	850.521739130435	683.021739130435	1050.63043478261	1108.21739130435	935.326086956522	685.641304347826	1118.47826086957	1106.86956521739	1033.33695652174	602.282608695652	882.54347826087	1055.58695652174	838.195652173913	588.141304347826	1039.07608695652	874.5	834.5	606.402173913044	761.380434782609	849.239130434783	535.771739130435	818.271739130435	812.434782608696	654.847826086957	971.054347826087	729.239130434783	875.369565217391	707.619565217391	876.54347826087	1162.66304347826	866.04347826087	711.347826086957	994.304347826087	959.95652173913	958.836956521739	708.304347826087	1244.73913043478	903.782608695652	782.478260869565	694.304347826087	857.855360869565	0.872319697382226
DMAC2L	576.369565217391	531.467391304348	536.021739130435	581.478260869565	573.565217391304	520.021739130435	484.597826086957	649.75	487.891304347826	632.521739130435	657.532608695652	676.771739130435	467.195652173913	533.152173913044	486.532608695652	680.630434782609	590	511.173913043478	601.282608695652	748.586956521739	539.065217391304	578.54347826087	608.978260869565	676.652173913044	689.891304347826	690.108695652174	757.5	576.695652173913	596.956521739131	691.45652173913	479.434782608696	501.391304347826	521.923913043478	489.586956521739	466.336956521739	417.847826086957	479.184782608696	579.934782608696	546.239130434783	508.086956521739	450.630434782609	680.130434782609	420.652173913044	622.239130434783	630.217391304348	610.717391304348	572.542297826087	0.611963499873645
MAPK7	417.913043478261	431.586956521739	383.902173913044	354.891304347826	421.717391304348	396.445652173913	420.402173913044	345.934782608696	594.065217391304	444.586956521739	396.065217391304	439.54347826087	648.673913043478	501.315217391304	497	534.119565217391	546.630434782609	506.5	509.5	553.239130434783	530.597826086957	473.673913043478	527.956521739131	563.630434782609	490.347826086957	470.369565217391	524.239130434783	487.891304347826	497.369565217391	442.978260869565	490.847826086957	468.304347826087	415.391304347826	408.826086956522	556.282608695652	534.119565217391	395.891304347826	354.54347826087	405.467391304348	391.673913043478	396.608695652174	371.717391304348	439.739130434783	448.934782608696	378.065217391304	394.79347826087	460.962902173913	0.508274788764148
ALKBH8	438.086956521739	413.467391304348	400.652173913044	558.141304347826	454.663043478261	421.5	456.869565217391	556.847826086957	403.576086956522	449.434782608696	570.804347826087	598.423913043478	414.478260869565	367.423913043478	451.130434782609	542.79347826087	424.369565217391	358.467391304348	446.336956521739	516.880434782609	431.467391304348	336.347826086957	472.152173913044	523.45652173913	422.239130434783	424.760869565217	585.467391304348	390.347826086957	422.141304347826	463.054347826087	412.586956521739	342.130434782609	383.152173913044	490.445652173913	404.260869565217	255.95652173913	307.95652173913	545.54347826087	415.217391304348	300.413043478261	331.173913043478	557.152173913044	318.663043478261	402.413043478261	413.760869565217	514.391304347826	437.195652173913	0.280674532404896
SASH1	439.934782608696	436.173913043478	514.565217391304	488.45652173913	492.021739130435	449.086956521739	481.75	488.934782608696	386.695652173913	457.478260869565	406.956521739131	501.086956521739	509.673913043478	480.173913043478	519.369565217391	529.217391304348	462.913043478261	460.065217391304	609.586956521739	485.195652173913	391.673913043478	537.086956521739	454.04347826087	533.945652173913	491.978260869565	554.869565217391	449	462.586956521739	495.771739130435	449.315217391304	474.217391304348	415.815217391304	469.130434782609	521.130434782609	455.967391304348	461.086956521739	408.804347826087	509.065217391304	441.923913043478	462.391304347826	466.163043478261	498.826086956522	487.358695652174	435.130434782609	465.673913043478	502.445652173913	475.972593478261	0.85229254605076
NRSN2	436.79347826087	348.923913043478	329.467391304348	334.45652173913	362.728260869565	341.760869565217	391.673913043478	354.04347826087	460.586956521739	378.065217391304	449.945652173913	427.565217391304	415.304347826087	415.217391304348	420.369565217391	406.260869565217	372.282608695652	414.173913043478	384.021739130435	383.739130434783	368.978260869565	356.391304347826	413.54347826087	376.239130434783	422.239130434783	388.858695652174	424.152173913043	378.934782608696	391.673913043478	363.228260869565	378.608695652174	456.826086956522	394.695652173913	359.217391304348	476.54347826087	513.336956521739	383.79347826087	350.913043478261	424.152173913043	423.282608695652	459.880434782609	414.619565217391	521.728260869565	401.304347826087	378.065217391304	399.380434782609	401.042773913044	0.280674532404896
CMTM3	1362.97826086957	1251.17391304348	1169.54347826087	1057.10869565217	1208.28260869565	1279.28260869565	1309	1143.86956521739	1782.64130434783	1295.55434782609	1265.6847826087	1087.70652173913	1957.21739130435	1416.13043478261	1209.02173913043	1255.73913043478	1736.84782608696	1666.76086956522	1522.60869565217	1290.60869565217	1896.38043478261	1624.4347826087	1591.01086956522	1439.5652173913	1661	1655.23913043478	1458.17391304348	1748.54347826087	1660.65217391304	1310.92391304348	1688.91304347826	1730.39130434783	1617.53260869565	1242.26086956522	1670.19565217391	1734.45652173913	1619.5652173913	1017.30434782609	1360.95652173913	1278.02173913044	1426.4347826087	1309	1126.39130434783	1362.13043478261	1317.05434782609	1246.26086956522	1436.09902173913	0.826160591726835
CFAP36	1423.28260869565	1206.23913043478	1189.13043478261	1148.67391304348	1313.52173913043	1327	1392.80434782609	1097.19565217391	1176.95652173913	1190.30434782609	1197.78260869565	1027.10869565217	1419.51086956522	1565.02173913043	1422.05434782609	1006.39130434783	1260.02173913044	1388.09782608696	1120.4347826087	911.95652173913	1278.60869565217	1281.28260869565	1187.86956521739	913.239130434783	1073.54347826087	1020.39130434783	829	1153.77173913043	973.95652173913	997.945652173913	1195.16304347826	1113.30434782609	1073.32608695652	1205.02173913043	1289.02173913043	1236.47826086957	1282.4347826087	1132.13043478261	1185.58695652174	1400.95652173913	1366.89130434783	1035.63043478261	1427.6847826087	1133.52173913043	1023.40217391304	1033.63043478261	1187.54964782609	0.641196260776372
TMEM120B	286.95652173913	281.815217391304	300.95652173913	322.021739130435	321.065217391304	294.5	302.195652173913	337.95652173913	509.228260869565	290.326086956522	311.347826086957	324.347826086957	415.304347826087	406.489130434783	409.641304347826	441.847826086957	475.576086956522	486.565217391304	393.608695652174	510.565217391304	430.010869565217	443.760869565217	441.195652173913	542.076086956522	447.5	542.260869565217	575.75	441.04347826087	391.673913043478	429.75	383.152173913044	457.923913043478	468.304347826087	367.913043478261	392.423913043478	380	430.304347826087	360.445652173913	409.108695652174	345.597826086957	400.315217391304	435.673913043478	350	325.739130434783	392.521739130435	341.45652173913	398.874284782609	0.600046737493069
CARM1	658.130434782609	658.347826086957	653.021739130435	498.956521739131	637.760869565217	673.478260869565	700.478260869565	496.065217391304	725.195652173913	575.673913043478	608.119565217391	628.608695652174	732.086956521739	671.152173913044	604.869565217391	606.5	657.771739130435	711.478260869565	622.086956521739	644.608695652174	716.913043478261	634.847826086957	595.391304347826	646.739130434783	581.478260869565	667.771739130435	617.630434782609	635.826086956522	538.423913043478	465.5	665.391304347826	612.391304347826	668	521.130434782609	645.478260869565	782.228260869565	560.771739130435	507.239130434783	640.086956521739	623.945652173913	620.391304347826	495.717391304348	647.934782608696	584.29347826087	594.228260869565	480.065217391304	619.874058695652	0.349640218537533
TP53BP2	964.086956521739	925.45652173913	935.326086956522	960.847826086957	1050.98913043478	895.934782608696	975.619565217391	968.021739130435	1671.39130434783	1116.98913043478	1011.10869565217	1112.4347826087	1612.75	1339.59782608696	1287.71739130435	1299.57608695652	1679.15217391304	1464.58695652174	1425.45652173913	1464.23913043478	1583.6847826087	1422.60869565217	1386.04347826087	1508.32608695652	1426.69565217391	1344.46739130435	1399.88043478261	1330.45652173913	1340.92391304348	1323.19565217391	1231.90217391304	1129.69565217391	1226.05434782609	1100.10869565217	1170.89130434783	1191.65217391304	1134.55434782609	1148.10869565217	1110.34782608696	1042.13043478261	1164.39130434783	1180.63043478261	1109.32608695652	1012.73913043478	927.5	1182.9347826087	1223.70720652174	0.826160591726835
SNAPC5	727.271739130435	671.217391304348	687.554347826087	735.54347826087	675.195652173913	632.434782608696	657.130434782609	744.326086956522	552.021739130435	699.760869565217	709.271739130435	644.695652173913	545.934782608696	644.032608695652	515.304347826087	587.173913043478	569.5	615.478260869565	558.54347826087	592.586956521739	620.032608695652	588.782608695652	563.717391304348	605.119565217391	589.130434782609	598.369565217391	588.326086956522	613.097826086957	583.467391304348	603.021739130435	665.391304347826	676.989130434783	621.521739130435	653.021739130435	599.956521739131	605.54347826087	607.010869565217	673.04347826087	687.021739130435	635.086956521739	658.739130434783	785.532608695652	617.304347826087	736.29347826087	642.086956521739	709.489130434783	636.784260869565	0.737871286974978
POLR2H	528.717391304348	455.152173913044	455.206521739131	405.521739130435	436.673913043478	487.304347826087	451.445652173913	394.315217391304	566.978260869565	464.130434782609	504.913043478261	540.54347826087	463.826086956522	364.391304347826	399.097826086957	490.913043478261	461.554347826087	439.119565217391	337.391304347826	521.673913043478	475.097826086957	406.326086956522	418.086956521739	515.086956521739	395.75	473.586956521739	467.695652173913	477.630434782609	497.369565217391	433.826086956522	464.782608695652	407.565217391304	400.804347826087	444.315217391304	457.815217391304	489.586956521739	481.804347826087	419.5	474.695652173913	396.869565217391	386.478260869565	424.521739130435	380.391304347826	492.021739130435	425.260869565217	444.217391304348	450.433836956522	0.41262978248215
PEAK1	1211.73913043478	1089.89130434783	1564.10869565217	1612.75	1620.38043478261	1220.54347826087	1182.9347826087	1646.69565217391	1193.75	1182.10869565217	1148.67391304348	1466.61956521739	1194.8152173913	996.293478260869	1225.89130434783	1320.15217391304	1127.22826086957	1006.54347826087	1461.01086956522	1413.47826086957	1006	1144.63043478261	1166.0652173913	1364.39130434783	1190.51086956522	1356.45652173913	1376.0652173913	972.086956521739	1183.28260869565	1341.58695652174	1180.51086956522	1144.96739130435	1229.52173913043	1614.63043478261	1387.65217391304	1038.65217391304	1015.25	1540.63043478261	1158.16304347826	1089.60869565217	1022.23913043478	1590.69565217391	973.478260869565	814.304347826087	990.934782608696	1593.0652173913	1247.1953673913	0.342063766253539
ZNF462	406.260869565217	368.782608695652	524.423913043478	661.326086956522	572.391304347826	440.065217391304	351.717391304348	675.79347826087	263.782608695652	345.467391304348	397.45652173913	535.695652173913	314.673913043478	324.510869565217	409.641304347826	428.173913043478	321.065217391304	247.967391304348	466.652173913044	380.20652173913	323.760869565217	269.586956521739	327.434782608696	370.95652173913	300.04347826087	364.641304347826	372.445652173913	221.130434782609	283.891304347826	375.630434782609	295.086956521739	277.413043478261	323.576086956522	541.630434782609	357.173913043478	280.54347826087	283.45652173913	592.413043478261	329.847826086957	387.228260869565	282.782608695652	490.847826086957	321.065217391304	265.902173913044	315.141304347826	461.608695652174	379.375945652174	0.280674532404896
AC010618.1	434.510869565217	465.79347826087	403.271739130435	320.760869565217	400.891304347826	425.260869565217	427.565217391304	288.195652173913	385.565217391304	389.021739130435	365.217391304348	356.141304347826	414.478260869565	413.152173913044	412.478260869565	416.380434782609	418.434782608696	391.913043478261	335.25	352.967391304348	407.597826086957	411.652173913043	339.79347826087	393.684782608696	463	379.75	354.369565217391	450.413043478261	383.347826086957	384.847826086957	411.347826086957	429.95652173913	409.717391304348	334.108695652174	408.45652173913	441.923913043478	360.978260869565	349.608695652174	457.815217391304	458.576086956522	434.45652173913	306.760869565217	432.391304347826	478.782608695652	409.304347826087	341.45652173913	396.768430434783	0.593754333164763
VPS13D	1016.48913043478	859.869565217391	1534.98913043478	1444.19565217391	1863.21739130435	1139.76086956522	1006.69565217391	1502.4347826087	776.913043478261	1156.4347826087	1109.19565217391	1364.39130434783	762.95652173913	973.79347826087	1099.60869565217	1144.21739130435	884.684782608696	874.217391304348	1427.41304347826	1335.20652173913	809.673913043478	991.673913043478	1034.95652173913	1207.25	1009.0652173913	1219.30434782609	1249.11956521739	873.826086956522	1011.26086956522	1158.76086956522	1057.10869565217	1072.15217391304	1123.97826086957	1281.76086956522	1103.51086956522	991.065217391304	915.282608695652	1293.92391304348	1142.34782608696	1153.48913043478	903.369565217391	1525.63043478261	1058.83695652174	964.913043478261	1031.5	1415.63043478261	1127.74080652174	0.758884159468543
CEP63	444.076086956522	450.130434782609	499.282608695652	624.184782608696	530.5	492.978260869565	521.304347826087	676.847826086957	492.978260869565	442.326086956522	467.934782608696	496.391304347826	480.54347826087	573.641304347826	586.304347826087	469.04347826087	481.695652173913	497.586956521739	639.217391304348	391.913043478261	502.130434782609	497.586956521739	469.217391304348	415.739130434783	464.130434782609	547.239130434783	485.304347826087	468.25	426.391304347826	491.369565217391	489.652173913044	495.641304347826	504.913043478261	564.565217391304	524.347826086957	441.923913043478	427.5	598.369565217391	480.760869565217	556.021739130435	584.978260869565	586.673913043478	520.54347826087	450.869565217391	490.086956521739	544.260869565217	506.246693478261	0.961137282092571
DSTNP2	469.217391304348	430.554347826087	452.434782608696	699.413043478261	395.891304347826	404.217391304348	461.554347826087	679.782608695652	546.532608695652	468.25	555.423913043478	628.608695652174	566.673913043478	604.695652173913	739.978260869565	678.739130434783	605.217391304348	636.95652173913	808.086956521739	580.630434782609	551.097826086957	607.380434782609	608.978260869565	698.260869565217	575.673913043478	630.217391304348	635.913043478261	515.815217391304	533.347826086957	675.260869565217	469.434782608696	483.978260869565	503.054347826087	738.652173913044	533.695652173913	448.271739130435	423.978260869565	668	476.858695652174	481.880434782609	509.152173913044	717.065217391304	510.826086956522	469.869565217391	478.20652173913	708.782608695652	566.66327826087	0.872319697382226
FIGN	507.478260869565	485.304347826087	487.826086956522	608.902173913044	545.706521739131	443.978260869565	415.184782608696	604.945652173913	528.652173913044	498.826086956522	596.086956521739	658.847826086957	579.304347826087	349.945652173913	476.717391304348	515.217391304348	540.54347826087	400.847826086957	553.565217391304	509.228260869565	450.5	523.586956521739	592.152173913044	572.467391304348	502.880434782609	547.239130434783	619.934782608696	493.032608695652	647.195652173913	634.413043478261	463	471.673913043478	411.565217391304	635.619565217391	585.152173913044	441.923913043478	453.239130434783	657.217391304348	437.597826086957	486.739130434783	372.076086956522	601.858695652174	459.358695652174	460.152173913044	467.760869565217	684.184782608696	521.296319565217	0.872319697382226
CBR1	1461.86956521739	1336.57608695652	1266.98913043478	1008.86956521739	1273.4347826087	1270.95652173913	1391.41304347826	958.652173913043	997.380434782609	1039.15217391304	1131.25	1159.69565217391	1291.84782608696	1506.45652173913	1259.05434782609	1179.5	1174.47826086957	1416.13043478261	984.380434782609	1009.0652173913	1262.67391304348	1205.02173913043	1145.80434782609	1079.0652173913	1026.45652173913	1183.10869565217	1000.28260869565	1061.75	1059.21739130435	945.04347826087	1232.72826086957	1031.5	1084.71739130435	970.891304347826	1144.39130434783	1216.73913043478	1063.35869565217	945.369565217391	1271.65217391304	1250.79347826087	1189.63043478261	817.445652173913	1270.15217391304	1038.80434782609	999.815217391304	865.630434782609	1140.85205869565	0.280674532404896
SFT2D1	792.782608695652	812.826086956522	752.826086956522	712.586956521739	687.804347826087	835.771739130435	724.108695652174	743.597826086957	590	640.206521739131	819.934782608696	807.54347826087	658.021739130435	591.065217391304	472.978260869565	737.782608695652	758.554347826087	576.695652173913	536.097826086957	812.054347826087	689.326086956522	664.260869565218	693.29347826087	842.521739130435	726.195652173913	734.326086956522	783.195652173913	677.54347826087	845.489130434783	747.326086956522	796.565217391304	855.673913043478	706.673913043478	759.326086956522	628.760869565217	732.630434782609	787.608695652174	855.673913043478	751.934782608696	611.369565217391	670.065217391304	899.119565217391	581.086956521739	933.597826086956	883.456521739131	937.869565217391	736.046315217391	0.3148362553045
PDCD2	1047.19565217391	972.869565217391	926.5	1080.96739130435	876.065217391304	926.782608695652	864.456521739131	1197.04347826087	855.673913043478	941.978260869565	1161.46739130435	1168	924.597826086957	938.978260869565	888.804347826087	1201.30434782609	1013.35869565217	859.782608695652	969.086956521739	1142	972.086956521739	825.021739130435	1018.69565217391	1167	948.391304347826	978.869565217391	1222.14130434783	987.206521739131	972.260869565217	1052.52173913043	907.847826086956	911.760869565217	936.510869565217	1022.97826086957	831.826086956522	879.336956521739	935.532608695652	994.913043478261	920.565217391304	855.673913043478	972.804347826087	1083.14130434783	805.369565217391	1062.34782608696	1029.04347826087	1035.13043478261	984.475856521739	0.606744119727504
THAP4	606.815217391304	499.586956521739	538.554347826087	400.804347826087	552.25	420.434782608696	542.54347826087	404.152173913044	604.945652173913	470	531.771739130435	444.826086956522	632.152173913044	521.608695652174	574.5	429.5	582.717391304348	553.021739130435	556.989130434783	451.641304347826	613.891304347826	519.478260869565	514.565217391304	461.086956521739	473.826086956522	547.239130434783	480.065217391304	473.173913043478	504.554347826087	457.663043478261	557.858695652174	504.967391304348	526.141304347826	402.597826086957	556.282608695652	686.804347826087	508.521739130435	409.95652173913	504.315217391304	514.565217391304	558.217391304348	421.434782608696	594.065217391304	413.934782608696	430.369565217391	430.652173913044	508.370506521739	0.704366192260238
NAGLU	466.902173913044	460.652173913044	394.097826086957	337.521739130435	419.5	416.608695652174	426.04347826087	350.652173913044	362.891304347826	503.054347826087	454.04347826087	424.597826086957	363.934782608696	476.608695652174	399.097826086957	377.934782608696	348.054347826087	455.847826086957	384.021739130435	446.336956521739	365.760869565217	453.913043478261	373.304347826087	379.20652173913	467.847826086957	399.489130434783	418.869565217391	429	331.5	334.673913043478	368.021739130435	428.804347826087	372.076086956522	344.434782608696	399.380434782609	481.065217391304	403.717391304348	308.20652173913	375.630434782609	481.880434782609	502.445652173913	326.673913043478	507.239130434783	411.173913043478	371.586956521739	325.086956521739	404.986760869565	0.809127401423313
NARS2	1200.1847826087	1168.65217391304	1100.65217391304	1389.85869565217	1104.45652173913	1259.05434782609	1045.80434782609	1348.13043478261	1163.73913043478	1140.45652173913	1209.02173913043	1276.02173913043	1096.84782608696	1182.63043478261	1110.58695652174	1231.0652173913	1178.9347826087	1044.76086956522	1097.55434782609	1210.52173913043	1106.19565217391	1028.30434782609	1203.15217391304	1224.76086956522	1020.17391304348	1082.5652173913	1104.78260869565	1034.95652173913	1139.76086956522	1316.23913043478	1129.47826086957	1096.84782608696	1077.34782608696	1350.86956521739	1157.95652173913	991.065217391304	1089.03260869565	1359.71739130435	1164.5652173913	930.326086956522	1085.11956521739	1320.15217391304	1100.38043478261	1108.61956521739	1107.45652173913	1356.02173913043	1157.4953326087	0.660888234478112
PQLC3	1415.80434782609	1697.79347826087	1501.77173913044	1310.71739130435	1393.13043478261	1732.13043478261	1474	1330.89130434783	1220.32608695652	1603.64130434783	1254.92391304348	1494.66304347826	991.478260869565	1447.26086956522	1420.60869565217	1602	1270.95652173913	1384	1210.76086956522	1407.45652173913	1422.32608695652	1370.21739130435	1374.13043478261	1441.6847826087	1527.92391304348	1456.04347826087	1372.9347826087	1476.45652173913	1389.01086956522	1458.96739130435	1376.54347826087	1449.0652173913	1330.21739130435	1387.4347826087	1273.95652173913	1299.30434782609	1467.63043478261	1392.17391304348	1387.4347826087	1403.22826086957	1378.04347826087	1231.5	995.076086956522	1373.67391304348	1393.44565217391	1295.85869565217	1388.88250869565	0.280977609908587
EFNA5	1144.04347826087	1110.34782608696	1153.77173913043	1023.40217391304	1119.65217391304	1124.69565217391	1112.27173913044	1045.80434782609	967.217391304348	1114.78260869565	1246.65217391304	1210.52173913043	1061.4347826087	1316.64130434783	1450.91304347826	1267.38043478261	1035.71739130435	1208.28260869565	1508.02173913043	1351.44565217391	1143.26086956522	1035.63043478261	1286	1137.95652173913	1213.82608695652	1184.45652173913	1238.47826086957	1146.36956521739	1216.73913043478	1151.5	1171.08695652174	1153.65217391304	1113.30434782609	1212.08695652174	1003.23913043478	1282.65217391304	1107.65217391304	1160.34782608696	1043.19565217391	1285.45652173913	1139.76086956522	1144.04347826087	1091.91304347826	1118.60869565217	1373.4347826087	1167.26086956522	1171.62857391304	0.891987221425214
MLH3	1176.08695652174	1197.78260869565	1372.04347826087	1358.67391304348	1334.79347826087	1213.82608695652	1260.76086956522	1334.23913043478	1142.86956521739	1355.0652173913	1212.08695652174	1249.5652173913	1080.96739130435	1275.67391304348	1198.45652173913	1356.70652173913	1108.61956521739	1316.5	1183.28260869565	1370.82608695652	1196.80434782609	1386.47826086957	1192.82608695652	1240.84782608696	1283.02173913043	1098.82608695652	1204.8152173913	1279.28260869565	1069.77173913043	1174.80434782609	1238.64130434783	1338.97826086957	1169.39130434783	1344.65217391304	1307.82608695652	1134.41304347826	1128.32608695652	1299.84782608696	1123.36956521739	1147.75	1049.59782608696	1316.23913043478	1121.65217391304	1237.47826086957	1223.52173913043	1204.30434782609	1230.70202173913	0.292122882576362
METTL23	579.684782608696	541.739130434783	511.586956521739	542.076086956522	534.315217391304	559.413043478261	485.673913043478	553.434782608696	444.826086956522	572.326086956522	500.989130434783	555.934782608696	400.032608695652	395.347826086957	353.065217391304	559.815217391304	486.271739130435	390.717391304348	425.945652173913	593.978260869565	494.130434782609	429.576086956522	523.391304347826	525.717391304348	447.5	551.554347826087	552.25	480.228260869565	468.782608695652	521.728260869565	516.032608695652	493.163043478261	466.413043478261	556.347826086957	432.413043478261	389.021739130435	521.304347826087	621.79347826087	451.228260869565	373.913043478261	426.097826086957	591.652173913044	374.228260869565	585.467391304348	597.217391304348	620.282608695652	499.96975	0.94544327081509
COP1	1086.32608695652	1066.66304347826	943.130434782609	1055.17391304348	1160.5	1034.60869565217	901.347826086957	1185.41304347826	939.076086956522	1066.13043478261	1111.34782608696	1229.13043478261	917.923913043478	861.478260869565	909	1106.19565217391	963.065217391304	892.304347826087	868.902173913044	1080.96739130435	1044.76086956522	876.54347826087	1073.76086956522	1155.78260869565	968.021739130435	934.891304347826	1163.13043478261	981.739130434783	1064.80434782609	1025.28260869565	1031.5	981.521739130435	977.510869565217	998.347826086957	913.152173913043	780.869565217391	906.913043478261	1065.84782608696	1009.41304347826	836.29347826087	787.847826086957	1085.5	780.95652173913	1017.30434782609	1019.46739130435	1074.23913043478	998.567082608696	0.280977609908587
FXR2	825.347826086957	722.032608695652	686.347826086957	501.239130434783	603.304347826087	628.25	726.434782608696	490.260869565217	881.891304347826	735.989130434783	590.076086956522	606.934782608696	767.413043478261	691.695652173913	597.913043478261	553.673913043478	684.652173913044	665.391304347826	562.347826086957	541.95652173913	719.978260869565	702.5	599.630434782609	558.021739130435	674.347826086957	682.565217391304	475.413043478261	724.771739130435	648.673913043478	591.521739130435	675.695652173913	651.065217391304	702.326086956522	546.728260869565	761.630434782609	855.79347826087	679.652173913044	500.489130434783	690.695652173913	690.315217391304	697.478260869565	533.478260869565	758.739130434783	643.489130434783	628.913043478261	582.413043478261	653.03212826087	0.968830642114461
ZEB2	327.586956521739	364.913043478261	414.173913043478	417.304347826087	397.260869565217	360.521739130435	359.173913043478	428.358695652174	419.086956521739	365.95652173913	379.20652173913	455.206521739131	450.869565217391	569.804347826087	595.739130434783	615.478260869565	696.565217391304	431.086956521739	613.29347826087	696.695652173913	603.934782608696	490.847826086957	509.5	550.782608695652	528.163043478261	522.565217391304	590.228260869565	454.586956521739	410.913043478261	539.239130434783	420.152173913043	418.195652173913	443.630434782609	459.478260869565	379.695652173913	367.282608695652	371.652173913044	420.652173913044	374.130434782609	410.108695652174	381.032608695652	462.195652173913	416.5	367.967391304348	426.934782608696	487.891304347826	460.142252173913	0.687887951663988
CXorf38	732.45652173913	766.54347826087	700.717391304348	750.467391304348	814.04347826087	777.434782608696	718.445652173913	787.532608695652	834.130434782609	874.934782608696	864.456521739131	747.217391304348	849.391304347826	838.086956521739	816.413043478261	734.467391304348	805.695652173913	851.782608695652	871.217391304348	784.260869565217	928.260869565217	861.173913043478	796.565217391304	784.673913043478	941.695652173913	839.902173913043	811.413043478261	877.641304347826	896.434782608696	887.75	827.358695652174	807.54347826087	780.608695652174	730.978260869565	842.771739130435	699.760869565217	820.326086956522	777.260869565217	770.576086956522	878.217391304348	892.652173913043	924.891304347826	652.913043478261	823.597826086957	841.326086956522	855.79347826087	814.603976086957	0.54550455276441
EARS2	878.706521739131	849.391304347826	940.434782608696	945.369565217391	951.804347826087	876.391304347826	928.586956521739	965.293478260869	765.195652173913	904.065217391304	850.521739130435	904.336956521739	820.652173913044	985.086956521739	960.304347826087	920.010869565217	803.913043478261	829.652173913044	970.173913043478	859.565217391304	820.891304347826	872.858695652174	841.217391304348	838.304347826087	819.826086956522	957.532608695652	833.695652173913	845.934782608696	833.945652173913	833.695652173913	809.565217391304	816.597826086957	880.423913043478	902.108695652174	868.413043478261	901	826.934782608696	921.652173913044	892.652173913043	940.434782608696	928.45652173913	893.717391304348	950.793478260869	796.95652173913	848.195652173913	796.29347826087	877.859882608696	0.500864524112485
STX8	679.434782608696	736.847826086957	632.152173913044	708.782608695652	648.760869565217	792.391304347826	619.260869565217	626.239130434783	642.923913043478	679.054347826087	568.54347826087	664.521739130435	770.130434782609	943	732.086956521739	663.934782608696	753.717391304348	812.576086956522	705.152173913044	589.489130434783	732.347826086957	734.956521739131	656.739130434783	644.521739130435	651.391304347826	719.347826086957	428.869565217391	643.336956521739	776.021739130435	715.239130434783	636.304347826087	683.663043478261	706.217391304348	752.652173913044	688.467391304348	841.108695652174	788.304347826087	634.75	856.413043478261	841	822.152173913043	541.45652173913	963.032608695652	663.521739130435	590.304347826087	711.608695652174	704.189736956522	0.475111498918976
DUSP11	909.076086956522	902.347826086956	892	949.804347826087	783.902173913044	919.141304347826	887.304347826087	1030.03260869565	888.989130434783	843.95652173913	989.413043478261	981.369565217391	819.347826086957	774.760869565218	768	1028.84782608696	900.130434782609	778.706521739131	836.695652173913	963.065217391304	819.347826086957	768.239130434783	831.097826086957	1082.35869565217	931.804347826087	964.228260869565	1119.25	883.456521739131	922.891304347826	1005.85869565217	885.336956521739	907.663043478261	901.673913043478	929.152173913043	809.673913043478	727.978260869565	853.695652173913	936.652173913044	924.086956521739	772.456521739131	836.554347826087	1022.23913043478	816.413043478261	974.826086956522	938.978260869565	1080.96739130435	902.038526086957	0.872319697382226
ANKMY2	759.54347826087	718.445652173913	729.239130434783	702.5	698.456521739131	775.586956521739	719.347826086957	698.673913043478	815.608695652174	743.782608695652	639.836956521739	600.195652173913	790.510869565217	652.586956521739	661.326086956522	618.119565217391	724.978260869565	717.065217391304	651.326086956522	617.086956521739	630.217391304348	752.652173913044	728.934782608696	582.510869565217	645.891304347826	609.684782608696	546.434782608696	679.108695652174	624.467391304348	669.532608695652	644.032608695652	659.782608695652	680.934782608696	776.141304347826	714.608695652174	816.315217391304	785.804347826087	761.521739130435	774.413043478261	755.597826086957	718.445652173913	648.402173913044	702.673913043478	751.391304347826	652.521739130435	681.108695652174	696.246697826087	0.872319697382226
RABL3	1026.09782608696	1168.65217391304	1092.84782608696	1325.63043478261	1024.17391304348	1143.26086956522	1103.51086956522	1374.82608695652	725.195652173913	954.717391304348	1174.27173913043	1149.13043478261	783.304347826087	976.434782608696	1120.0652173913	1144.21739130435	937.108695652174	873.239130434783	1047.04347826087	1216.32608695652	942.608695652174	990.108695652174	1048.03260869565	1176.08695652174	1084.08695652174	978.869565217391	1299.84782608696	1021.79347826087	1113.58695652174	1190.71739130435	950.326086956522	1060.33695652174	1053.1847826087	1168.28260869565	932.54347826087	711.347826086957	949.391304347826	1267.89130434783	998.760869565217	1093.78260869565	1017.73913043478	1313.52173913043	917.163043478261	1141.19565217391	1114.59782608696	1164.19565217391	1066.52292608696	0.888792823390894
BCORL1	430.652173913044	376.782608695652	491.630434782609	443.978260869565	525.717391304348	390.54347826087	426.04347826087	483.510869565217	361.45652173913	321.630434782609	341.695652173913	327.978260869565	442.54347826087	334.673913043478	363.228260869565	334.260869565217	435.021739130435	408.978260869565	538.391304347826	431.586956521739	367.967391304348	411.652173913043	449.141304347826	461.086956521739	481.065217391304	420.369565217391	504.478260869565	399.347826086957	342.695652173913	423.695652173913	458.04347826087	426.934782608696	476.717391304348	427.565217391304	431.326086956522	435.934782608696	393.760869565217	479.695652173913	384.847826086957	551.554347826087	448.967391304348	488.45652173913	482.54347826087	397.630434782609	459.847826086957	455.760869565217	427.638952173913	0.292122882576362
SH3GLB2	651.260869565217	707.760869565217	688.739130434783	474.326086956522	603.304347826087	674.934782608696	746.521739130435	440.065217391304	768.413043478261	626.032608695652	661.326086956522	504.717391304348	751.934782608696	766.608695652174	723.304347826087	527.869565217391	675.032608695652	848.434782608696	648.586956521739	503.532608695652	788.673913043478	782.695652173913	566.673913043478	505.282608695652	636.782608695652	726.315217391304	511.826086956522	758.739130434783	638.652173913044	531.119565217391	691.282608695652	653.913043478261	674.239130434783	590.402173913044	768	725.467391304348	708.304347826087	458.630434782609	683.760869565217	757.597826086957	803.913043478261	443.565217391304	712.434782608696	650.945652173913	658.130434782609	549.847826086957	651.519608695652	0.872319697382226
STXBP1	1104.17391304348	929.434782608696	1078.67391304348	1038.5	1034.60869565217	1015.5652173913	1052.52173913043	996.010869565218	891.565217391304	828.673913043478	841.54347826087	738.586956521739	991.478260869565	878.54347826087	899.369565217391	705.521739130435	814.95652173913	1022.42391304348	937.271739130435	716.195652173913	773.25	883.880434782609	897.608695652174	740.260869565217	815.336956521739	726.315217391304	670.25	782.391304347826	737.782608695652	749.108695652174	1001.11956521739	974.521739130435	983.836956521739	1031.3152173913	1074.23913043478	1111.92391304348	1001.69565217391	1010.0652173913	865.097826086956	1126.85869565217	1071.01086956522	841.706521739131	973.478260869565	897.739130434783	921.478260869565	862.815217391304	913.928434782609	0.867976901871217
STAT6	1252.11956521739	1317.82608695652	1467.89130434783	1044.04347826087	1210.23913043478	1325.63043478261	1528.8152173913	1022.42391304348	1158.5652173913	1240.5	1174.27173913043	976.858695652174	1056.54347826087	1368.5652173913	1203.15217391304	1114.59782608696	1047.67391304348	1382.65217391304	1141.04347826087	953.5	1128.19565217391	1308.20652173913	1070.07608695652	972.934782608696	1133.02173913043	996.934782608696	1028.63043478261	1225.69565217391	927.663043478261	984.086956521739	1156.04347826087	1286.80434782609	1337.03260869565	1015.45652173913	1215.76086956522	1473.23913043478	1422.32608695652	1057.91304347826	1224.76086956522	1661	1587.89130434783	941.695652173913	1569.86956521739	1571.82608695652	1525.15217391304	955.630434782609	1212.27737826087	0.342063766253539
EEF1D	2384.86956521739	1861.52173913043	2084.23913043478	1373.67391304348	2270.32608695652	1716.55434782609	2261.25	1226.05434782609	2125.21739130435	1901.39130434783	1892.94565217391	1449.47826086957	2274.02173913044	2738.3152173913	2182.39130434783	1614.91304347826	1830.76086956522	2406.39130434783	2109.75	1498.39130434783	2118.9347826087	2064.34782608696	1657.47826086957	1367.58695652174	1959.94565217391	1899.85869565217	1405.30434782609	2037.36956521739	1772.73913043478	1450.91304347826	2150.66304347826	1878.53260869565	1819.52173913043	1398.9347826087	2022.82608695652	2799.10869565217	1744.79347826087	1356.95652173913	1976.54347826087	2336.0652173913	2122.9347826087	1166.45652173913	2835.45652173913	1743.84782608696	1586.02173913043	1148.26086956522	1891.82304347826	0.836403950946765
ZNF598	743.880434782609	764.445652173913	811.413043478261	654.086956521739	719.347826086957	658.5	819.423913043478	631.5	939.076086956522	727.728260869565	790.413043478261	693.130434782609	891.336956521739	780.239130434783	796.95652173913	802.869565217391	787.108695652174	843.130434782609	797.956521739131	766.608695652174	889.413043478261	777	812.434782608696	720.326086956522	834.913043478261	812.195652173913	760.978260869565	878.706521739131	810.130434782609	697.673913043478	792.260869565217	832.108695652174	785.065217391304	692.630434782609	822.95652173913	911.423913043478	771.076086956522	646.891304347826	797.478260869565	817.239130434783	953.239130434783	679	857.608695652174	840.173913043478	808.086956521739	621.163043478261	783.507084782609	0.606344589231427
ASF1A	940.434782608696	1165.20652173913	1022.60869565217	1128.32608695652	942.608695652174	1072.15217391304	1035.71739130435	1171.08695652174	760.065217391304	943.847826086957	1031.13043478261	934.20652173913	693.217391304348	798.902173913044	909	844.804347826087	723.206521739131	658.95652173913	720.326086956522	784.260869565217	806.717391304348	656.652173913044	720.891304347826	686.608695652174	645.891304347826	692.336956521739	664.521739130435	612.032608695652	714.608695652174	776.141304347826	778.706521739131	713.195652173913	721.815217391304	972.521739130435	752.652173913044	645.891304347826	811.75	1041.41304347826	838.478260869565	754.304347826087	784.413043478261	985.20652173913	679.858695652174	893.989130434783	931.173913043478	1023.80434782609	838.81827173913	0.292122882576362
PRMT2	1175.17391304348	1167.4347826087	1120.82608695652	806.315217391304	1055.38043478261	1164.85869565217	1120.25	779	1440.02173913043	1175.52173913043	929.597826086957	716.391304347826	1279.28260869565	1260.02173913044	1096.17391304348	794.239130434783	1076.61956521739	1363.94565217391	1141.04347826087	805.369565217391	1194.67391304348	1225.69565217391	984.956521739131	756.195652173913	1057.39130434783	926.5	714.173913043478	1219.65217391304	1001.26086956522	866.826086956522	1204.45652173913	1219.88043478261	1114.41304347826	877.130434782609	1322.86956521739	1438.30434782609	1255.32608695652	823.336956521739	1264.5652173913	1356.23913043478	1269.97826086957	782.391304347826	1393.76086956522	1210.03260869565	1013.73913043478	805.369565217391	1081.88235869565	0.617287366399303
SYNPO	1537.15217391304	1209.64130434783	1468.88043478261	1108.61956521739	1309.73913043478	1195.16304347826	1420.08695652174	1173.5652173913	858.913043478261	959.95652173913	1016.95652173913	864.195652173913	827.673913043478	704.586956521739	762.717391304348	646.173913043478	679.054347826087	744.489130434783	692.826086956522	574.358695652174	726.054347826087	741.380434782609	823.5	684.826086956522	821.239130434783	837.934782608696	691.45652173913	870.141304347826	838.086956521739	805.695652173913	950.326086956522	1069.14130434783	1109.32608695652	986.413043478261	1269.97826086957	1048.34782608696	1100.38043478261	1099	965.293478260869	1059.21739130435	1224.76086956522	1070.07608695652	988.70652173913	1073.32608695652	1205.84782608696	1155.36956521739	977.621193478261	0.872319697382226
BRD8	926.782608695652	943	968.152173913044	862.934782608696	897.869565217391	949.521739130435	1013.35869565217	843.239130434783	904.239130434783	1097.55434782609	930.456521739131	740.380434782609	859.413043478261	1076.78260869565	869.695652173913	814.630434782609	860.847826086957	1042.95652173913	882.923913043478	779.891304347826	754.130434782609	971.597826086957	799.434782608696	671.217391304348	890.434782608696	698.032608695652	748.478260869565	982.597826086957	758.869565217391	773.836956521739	786.891304347826	968.673913043478	922.086956521739	754.130434782609	879.782608695652	1194.26086956522	963.032608695652	721.934782608696	902.543478260869	1197.78260869565	1032.29347826087	693.630434782609	1102.89130434783	1058.22826086957	954.010869565218	669.771739130435	893.808841304348	0.854761287454209
PELO	869.956521739131	773.597826086957	650	898.391304347826	751.782608695652	715.565217391304	755.804347826087	1007.9347826087	788.673913043478	880.804347826087	899.217391304348	899.119565217391	956.434782608696	744.065217391304	846.358695652174	879.782608695652	846.521739130435	770.29347826087	928.847826086957	844.065217391304	835.978260869565	748.217391304348	799.434782608696	875.641304347826	787.108695652174	790.304347826087	879.04347826087	777.260869565217	827.815217391304	786.239130434783	746.630434782609	830.728260869565	814.467391304348	865.630434782609	928.978260869565	758.554347826087	814.304347826087	768.065217391304	825.608695652174	722.260869565218	737.782608695652	969.869565217391	748.217391304348	794.336956521739	803.336956521739	874.804347826087	822.126891304348	0.720655643821645
CDC16	2582.46739130435	2665.79347826087	2470.89130434783	2541.0652173913	2514.71739130435	2577.39130434783	2555.86956521739	2663.84782608696	2751.59782608696	2843.54347826087	2919.66304347826	2600.36956521739	2595.71739130435	2322.85869565217	2252.82608695652	2619.5652173913	2749.71739130435	2556.40217391304	2432.78260869565	2775.64130434783	2729.21739130435	2757.94565217391	2693.84782608696	2769.54347826087	2883.65217391304	2745.39130434783	3068.30434782609	2979.39130434783	2802.78260869565	2710.80434782609	2723.5652173913	2854.53260869565	2858.60869565217	2655.48913043478	2396.39130434783	2541.0652173913	2803.53260869565	2720.13043478261	2659.30434782609	2430.08695652174	2468.77173913044	2649.69565217391	2329.05434782609	3073.65217391304	2817.52173913044	2691.5	2669.70667391304	0.611963499873645
GIT1	2243.65217391304	2026.52173913043	2247.84782608696	1837.54347826087	1917.66304347826	1885.97826086957	2145.71739130435	1783.23913043478	1896.10869565217	1583.45652173913	1667.91304347826	1659.39130434783	2150.23913043478	2247.1847826087	2281.91304347826	1798.55434782609	1861.85869565217	2184.80434782609	2632.5652173913	1819.21739130435	2147.48913043478	1951.80434782609	1898.5	1773.80434782609	1895.3152173913	1937.85869565217	1967.38043478261	2009.32608695652	1792.67391304348	1792.39130434783	1834.23913043478	1955.30434782609	1789.77173913044	1733.83695652174	1932.39130434783	2010.69565217391	1782.89130434783	1645.9347826087	1651.17391304348	2171.77173913044	2131.30434782609	1541.32608695652	1822.34782608696	1579.70652173913	1828.52173913043	1522.4347826087	1912.4252826087	0.280674532404896
ELAC2	1896.38043478261	1557.05434782609	1694.91304347826	1555.26086956522	1677.54347826087	1472.11956521739	1784.97826086957	1603.1847826087	2068.10869565217	1707.96739130435	1862.19565217391	1574.91304347826	1943.86956521739	1819.52173913043	1886.66304347826	1728.60869565217	1717.45652173913	1793.82608695652	1830.02173913043	1553.66304347826	1828.91304347826	1658.71739130435	1825.54347826087	1601.71739130435	1622.36956521739	1775.69565217391	1603.02173913044	1763.9347826087	1655.71739130435	1581.26086956522	1828.91304347826	1775.33695652174	1708.84782608696	1570.15217391304	2011.39130434783	1951.80434782609	1715.71739130435	1438.97826086957	1689.73913043478	1873.89130434783	1861.52173913043	1630.01086956522	1995.32608695652	1767.65217391304	1773.54347826087	1603.1847826087	1735.67719565217	0.708269709200534
CCDC82	981.934782608696	895.586956521739	971.913043478261	1063.17391304348	815.195652173913	960.728260869565	925.771739130435	1144.96739130435	884.847826086957	970.891304347826	1191.80434782609	1030.84782608696	993.782608695652	911.95652173913	864.282608695652	1025.02173913043	1045.80434782609	955.978260869565	956.956521739131	1099.60869565217	975.04347826087	1078.04347826087	989.923913043478	1076.61956521739	1063.35869565217	825.608695652174	1100.10869565217	936.869565217391	1032.69565217391	1085.5	957.717391304348	941.423913043478	848.315217391304	971.597826086957	867.04347826087	865.402173913044	895.260869565218	990.239130434782	862.554347826087	877.641304347826	825.608695652174	939.076086956522	815.336956521739	955.478260869565	954.010869565218	999.717391304348	965.679365217391	0.280674532404896
MT-ND6	1148.67391304348	732.086956521739	1633.80434782609	809.673913043478	947.923913043478	827.097826086957	1229.86956521739	738.413043478261	854.195652173913	742.086956521739	1034.4347826087	803.04347826087	796.434782608696	858.152173913044	1046.63043478261	621.391304347826	719.978260869565	989.108695652174	1117.80434782609	720.684782608696	855.673913043478	937.434782608696	776.391304347826	577.717391304348	897.739130434783	825.608695652174	694.021739130435	940.934782608696	836.413043478261	949.521739130435	993.478260869565	881.891304347826	960.304347826087	741.380434782609	836.836956521739	1149.45652173913	827.673913043478	794.576086956522	802.228260869565	1214.33695652174	1002.47826086957	879.336956521739	849.804347826087	684.891304347826	1134.1847826087	821.369565217391	896.460306521739	0.873110250020673
NEK6	920.826086956522	957.532608695652	1157.0652173913	1168.85869565217	1157.21739130435	907.956521739131	1220.54347826087	1127.22826086957	1258.6847826087	1190.30434782609	1160.69565217391	1187.86956521739	1278.26086956522	1049.76086956522	1147.01086956522	1094.80434782609	1157.21739130435	1094.64130434783	1127.22826086957	948.04347826087	1218.36956521739	1059.91304347826	1039.3152173913	970.021739130435	970.478260869565	1117.36956521739	991.336956521739	1020.39130434783	1091.21739130435	993.782608695652	1010.64130434783	986.902173913044	1150.82608695652	1110.20652173913	1096.5652173913	1116.98913043478	1169.54347826087	1117.36956521739	1220.90217391304	1067.9347826087	1170.1847826087	1241.71739130435	1304.82608695652	1099	1123.36956521739	1193.01086956522	1107.91159782609	0.585292872973451
SLIRP	1347.82608695652	1088.72826086957	1171.08695652174	1320.77173913043	1109.45652173913	1127.04347826087	1157.21739130435	1307.63043478261	1347.54347826087	1523.47826086957	1591.52173913043	1112.4347826087	1099.32608695652	1182.63043478261	1118.47826086957	908.782608695652	1078.23913043478	1202.08695652174	1143.69565217391	889.54347826087	1320.15217391304	1048.80434782609	1160.69565217391	943	980.565217391304	1211.73913043478	1096.97826086957	1169.39130434783	1139.76086956522	1166.45652173913	1139.25	1012.73913043478	1031.3152173913	1059.08695652174	1019.28260869565	1027.91304347826	994.456521739131	1133.33695652174	1128.19565217391	884.086956521739	1089.60869565217	1213.58695652174	1024.59782608696	1242.13043478261	1166.63043478261	1200	1139.81045217391	0.280674532404896
RPL29	1191.80434782609	1121.65217391304	1019.80434782609	759.652173913044	1163.86956521739	1016.95652173913	1002.10869565217	696.913043478261	997.380434782609	1008.41304347826	809.673913043478	897.869565217391	1040.5	1049.76086956522	919.467391304348	964.369565217391	871.95652173913	982.695652173913	698.673913043478	911.95652173913	1216.9347826087	943	972.663043478261	982.902173913044	848.032608695652	1130.97826086957	989.413043478261	1137.95652173913	934.760869565218	931.173913043478	1055.05434782609	868.097826086957	1056.23913043478	817.445652173913	953.804347826087	1263.02173913043	902.347826086956	830.152173913043	1113.30434782609	916.760869565217	846.673913043478	750.217391304348	1119.85869565217	947.804347826087	987.206521739131	841	967.006154347826	0.872319697382226
FAM32A	1066.13043478261	982.902173913044	965.293478260869	796.021739130435	922.760869565217	817.913043478261	956.304347826087	775.586956521739	1241.71739130435	1066.13043478261	1009.23913043478	827.358695652174	1116.73913043478	931.326086956522	837.934782608696	767.413043478261	909.152173913044	980.239130434783	830.152173913043	702.5	1045.80434782609	948.391304347826	919.467391304348	798.760869565217	853.608695652174	894.326086956522	823.336956521739	917.304347826087	872.695652173913	812.195652173913	1035.90217391304	942.5	920.95652173913	792.521739130435	988	1142.54347826087	996.130434782609	855.673913043478	1098.91304347826	865.902173913044	963.347826086956	863.891304347826	946.586956521739	958.5	946.934782608696	914.108695652174	926.546023913044	0.872319697382226
CYREN	885.336956521739	889.173913043478	1017.4347826087	924.336956521739	1089.19565217391	950.54347826087	1108.41304347826	926.195652173913	1171.66304347826	1011.10869565217	1057.91304347826	1017.4347826087	1211	1359.47826086957	1374.13043478261	1114.59782608696	1248.27173913043	1467.45652173913	1363.71739130435	1118.9347826087	1282.86956521739	1329.6847826087	1267.89130434783	1195.89130434783	1343.76086956522	1309	1210.38043478261	1307.28260869565	1134.69565217391	1072.97826086957	1141.84782608696	1142.70652173913	1216.73913043478	920.826086956522	1056.09782608696	1191.65217391304	1141.39130434783	882.663043478261	1083.14130434783	1218.52173913043	1204.1847826087	1039.47826086957	1058.83695652174	905.934782608696	1094.80434782609	936.652173913044	1130.35328695652	0.913534605720032
QRICH1	1884.05434782609	1927.73913043478	1757.39130434783	1637.79347826087	1867.91304347826	1791.76086956522	1860.0652173913	1721.65217391304	1773.80434782609	1863.60869565217	1828.91304347826	1666.47826086957	1831.65217391304	1873.01086956522	1782.64130434783	1744.79347826087	1735.22826086957	1766.72826086957	1719.13043478261	1734.80434782609	1926.72826086957	1825.86956521739	1813.70652173913	1666.47826086957	1751.89130434783	1760.60869565217	1772.73913043478	1830.02173913043	1798.55434782609	1569.86956521739	1818.5652173913	1746.36956521739	1746.03260869565	1674.19565217391	1965.71739130435	1929.36956521739	1911.80434782609	1699.32608695652	1779.5652173913	1770.60869565217	1725.5652173913	1734.80434782609	1711.1847826087	1763.09782608696	1718.5652173913	1550.19565217391	1776.75206521739	0.369822153350424
RDH11	2080.41304347826	1944.80434782609	1817.19565217391	1686.01086956522	1943.35869565217	1867.32608695652	1762.78260869565	1730.63043478261	1415.45652173913	1932.79347826087	2091.15217391304	2332.17391304348	1335.20652173913	1547.86956521739	1536.91304347826	1959.3152173913	1511.65217391304	1581.26086956522	1386.04347826087	2073.13043478261	1563.83695652174	1722.89130434783	1674.86956521739	2030.9347826087	1664.0652173913	1581.89130434783	2107.71739130435	1592	1469.67391304348	1602	1672.45652173913	1628.9347826087	1579.22826086957	1674.19565217391	1575.5	1594.32608695652	1481.34782608696	1756.08695652174	1657.71739130435	1465.34782608696	1531.36956521739	1661.34782608696	1672.83695652174	2010.69565217391	1914.5652173913	1953.0652173913	1725.53026086957	0.497622212394371
EPS8L2	1962.76086956522	1613.5652173913	1767.65217391304	1057.10869565217	1512.67391304348	1569.23913043478	2118.9347826087	991.804347826087	2246.40217391304	1873.63043478261	1498.39130434783	1054.65217391304	2169.41304347826	1770.94565217391	1469.95652173913	1084.3152173913	1572.59782608696	1914.95652173913	1268.63043478261	1052.52173913043	1793.55434782609	1884.72826086957	1430.48913043478	1035.90217391304	1602	1400.02173913043	1048.64130434783	1734.10869565217	1447.26086956522	1179.9347826087	1617.26086956522	1659.0652173913	1675.75	1191.80434782609	2061.17391304348	2364.0652173913	1774.13043478261	1128.97826086957	1712.34782608696	1824.88043478261	1911.13043478261	951.804347826087	2116.85869565217	1749.11956521739	1720.3152173913	1104.3152173913	1580.21286086957	0.829212566771181
SUB1	2888.80434782609	2720.85869565217	2681.91304347826	2737.60869565217	2784.19565217391	2672.21739130435	2570.45652173913	2804.28260869565	2430.70652173913	3095.17391304348	3134.4347826087	3284.19565217391	2231.89130434783	2150.66304347826	1985.76086956522	3225.20652173913	3024.95652173913	2289.64130434783	1977.23913043478	3678.95652173913	2923.02173913044	2435.90217391304	2685.30434782609	3402.02173913044	3185.13043478261	2796.02173913044	4089.4347826087	2903.73913043478	2836.08695652174	2675.9347826087	2530.21739130435	2403.84782608696	2449.07608695652	2381.28260869565	1921.73913043478	1924.23913043478	2243.65217391304	2731.63043478261	2334.02173913044	1669.88043478261	1944.45652173913	2912.69565217391	1792.39130434783	2637.39130434783	2603.91304347826	2659.30434782609	2640.03265217391	0.280674532404896
CSNK1G3	2606.13043478261	2853.38043478261	2617.05434782609	3286.76086956522	2722.16304347826	2850.36956521739	2867.39130434783	3477.28260869565	2344.76086956522	2612.65217391304	2844.21739130435	3041.97826086957	2579.67391304348	2563	2596.35869565217	2981.54347826087	2698.45652173913	2536.83695652174	2717.45652173913	2859.65217391304	2550.04347826087	2591.89130434783	2658.19565217391	2907.0652173913	2459.39130434783	2551.58695652174	2873.96739130435	2414.5652173913	2496.17391304348	2553.91304347826	2489.15217391304	2636.72826086957	2709.30434782609	3157.89130434783	2479.45652173913	2376.58695652174	2703.13043478261	3202.83695652174	2652.97826086957	2510.52173913044	2706.91304347826	3128.15217391304	2719.33695652174	2749.71739130435	2662.71739130435	2964.63043478261	2729.65136956522	0.709848632905838
TBL2	957.532608695652	820.489130434783	964.228260869565	918.021739130435	922.760869565217	793.326086956522	971.913043478261	995.076086956522	772.891304347826	853.521739130435	1066.66304347826	1010.28260869565	750.923913043478	782.391304347826	859.673913043478	1007.69565217391	849.54347826087	768.652173913044	825.684782608696	954.717391304348	831.826086956522	781.54347826087	873.239130434783	998.347826086957	927.217391304348	805.25	1175.76086956522	936.869565217391	816.119565217391	851.619565217391	916.619565217391	1012.73913043478	826.282608695652	756.195652173913	851.45652173913	801.891304347826	774	852.065217391304	877.847826086957	798.326086956522	867.04347826087	977.510869565217	829.95652173913	926.04347826087	888.380434782609	846.358695652174	883.619582608696	0.593754333164763
EID2	1336.32608695652	1312.26086956522	1095.58695652174	1203.67391304348	1135.0652173913	1151.76086956522	1182.9347826087	1162.97826086957	1479.76086956522	1337.46739130435	1199.89130434783	1104.45652173913	1224.28260869565	1172.19565217391	1122.10869565217	1130.84782608696	1325.82608695652	1197.45652173913	1111.20652173913	1000.79347826087	1318.8152173913	1120.91304347826	1298.65217391304	1110.34782608696	1157.77173913044	1216.17391304348	998.554347826087	1211.1847826087	1288.8152173913	1288.15217391304	1169.54347826087	1082.5652173913	1171.82608695652	1280.04347826087	1105.03260869565	1259.23913043478	1210.52173913043	1263.19565217391	1318.02173913043	1027.10869565217	1043.39130434783	1266.34782608696	1072.23913043478	1240.5	1094.35869565217	1349.5	1194.55863695652	0.803467492345781
AKT2	3280.5652173913	3035.60869565217	3357.4347826087	2217.15217391304	3229.94565217391	3037.60869565217	3555.9347826087	2100.05434782609	3032.21739130435	2929.07608695652	2763.41304347826	2815.71739130435	2792.86956521739	3063.65217391304	2670.9347826087	2924.90217391304	2805.54347826087	3202.83695652174	2841.01086956522	2863.04347826087	3221.21739130435	3048.9347826087	2621.47826086957	2743.13043478261	3318.30434782609	3088.26086956522	2918.42391304348	3353.76086956522	2815.71739130435	2453.89130434783	3067.5	3039.19565217391	3159.84782608696	2175.73913043478	2985.91304347826	3495.57608695652	3014.80434782609	2233.23913043478	2848.26086956522	3021.73913043478	3195.73913043478	2299.02173913044	3311.52173913044	2859.65217391304	3256.82608695652	2231.44565217391	2919.53610869565	0.872319697382226
SRRT	1613.95652173913	1502.59782608696	1434.55434782609	1026.64130434783	1485.04347826087	1382.23913043478	1508.89130434783	910.152173913044	1615.52173913043	1419.30434782609	1315.39130434783	1014.60869565217	1731.60869565217	1661.34782608696	1395.60869565217	1052.39130434783	1488.63043478261	1704.58695652174	1355.0652173913	935.739130434783	1630.45652173913	1464.58695652174	1392.96739130435	1044.5652173913	1357.20652173913	1290.60869565217	987.206521739131	1511.30434782609	1241.07608695652	1016.63043478261	1579.47826086957	1385.69565217391	1448.54347826087	1136.63043478261	1587.89130434783	2093.15217391304	1408.36956521739	974.391304347826	1463.45652173913	1583.04347826087	1540.95652173913	883.456521739131	1699.32608695652	1312.52173913043	1107.45652173913	920.130434782609	1361.19539130435	0.888792823390894
KLHL2	986.228260869565	981.934782608696	888.804347826087	1046.76086956522	848.315217391304	1013.63043478261	933.478260869565	1038.5	1471.89130434783	1220.90217391304	945.978260869565	1004.82608695652	1239.78260869565	1079.19565217391	1089.60869565217	1150.19565217391	1181.46739130435	1214.45652173913	1124.16304347826	1255.58695652174	1046.89130434783	1335.41304347826	1291.13043478261	1425.45652173913	1310.15217391304	1243.82608695652	1092.84782608696	1164.19565217391	1180.39130434783	1177.58695652174	1249.78260869565	1286.80434782609	1225.30434782609	1139.41304347826	1367.41304347826	1193.01086956522	1300.21739130435	1173.5652173913	1065.15217391304	1066.13043478261	1075	1188.13043478261	997.695652173913	1270.95652173913	1033.71739130435	1298.22826086957	1150.30691086957	0.292122882576362
GPATCH2L	987.510869565217	984.086956521739	1199.78260869565	1226.21739130435	1255.73913043478	1050.82608695652	1016.1847826087	1264.75	1082.95652173913	1145.45652173913	1091.91304347826	1209.02173913043	1143.26086956522	1012.36956521739	957.880434782609	1059.91304347826	1030.03260869565	945.652173913044	1078.9347826087	1218.36956521739	931.326086956522	991.673913043478	1049.4347826087	1199.89130434783	1026.45652173913	1002.10869565217	1240.36956521739	977.510869565217	1017.91304347826	1097.69565217391	1055.05434782609	1075.13043478261	1160.69565217391	1099.32608695652	1058.54347826087	1018.15217391304	1100.38043478261	1221.38043478261	1030.03260869565	1170.1847826087	986.739130434783	1351.44565217391	1072.23913043478	1040.30434782609	1095.9347826087	1226.89130434783	1092.55818478261	0.927072517886999
ORC4	2049.08695652174	2145.26086956522	1989.60869565217	2172.30434782609	2007.80434782609	2084.58695652174	1911.46739130435	2223.51086956522	1771.28260869565	2034.82608695652	1943.86956521739	2020.63043478261	1707.71739130435	1521.89130434783	1680.58695652174	2003.32608695652	1789.45652173913	1574.16304347826	1666.47826086957	2109.21739130435	1868.47826086957	1740.45652173913	1905.76086956522	2095.0652173913	1865.10869565217	1926.72826086957	2248.15217391304	1837.15217391304	2045.61956521739	2005.73913043478	1996.97826086957	1911.80434782609	1941.84782608696	1973.94565217391	1917.66304347826	1494.41304347826	1916.3152173913	2231.44565217391	1709.1847826087	1576.48913043478	1574.91304347826	2308.27173913044	1565.52173913043	2033.34782608696	2166.32608695652	2342.84782608696	1926.23156521739	0.86388751233461
MECP2	1410.86956521739	1454.79347826087	1557.28260869565	1459.69565217391	1552.13043478261	1369.45652173913	1351.44565217391	1426.4347826087	1482.09782608696	1505.02173913043	1390.5652173913	1588.15217391304	1503.54347826087	1405.5652173913	1500.65217391304	1466.86956521739	1535.40217391304	1523.94565217391	1806.0652173913	1691.63043478261	1260.02173913044	1502.08695652174	1591.01086956522	1803.5	1728.60869565217	1628.73913043478	1865.78260869565	1554	1572.59782608696	1705.71739130435	1443.23913043478	1500.91304347826	1680.9347826087	1464.23913043478	1574.41304347826	1697.52173913043	1245.89130434783	1548.89130434783	1370.21739130435	1529.02173913043	1405.30434782609	1595.05434782609	1374.34782608696	1289.02173913043	1231.69565217391	1486.63043478261	1513.71786956522	0.708269709200534
OSTM1	1720.3152173913	1592.28260869565	1567.48913043478	1831.20652173913	1475.65217391304	1492.41304347826	1572.82608695652	1977.84782608696	1519.02173913043	1621.86956521739	1797.32608695652	2101.96739130435	1512.91304347826	1226.89130434783	1369.45652173913	1866.10869565217	1476.72826086957	1318.8152173913	1479.08695652174	2000.36956521739	1509.52173913044	1483.4347826087	1496.59782608696	2039.36956521739	1564.10869565217	1314.84782608696	1949.34782608696	1376.30434782609	1603.9347826087	1632.55434782609	1447.86956521739	1565.02173913043	1484	1913.30434782609	1629.78260869565	1175.92391304348	1379.97826086957	1843.85869565217	1493.9347826087	1317.05434782609	1542.5	1857.35869565217	1352.71739130435	1738.14130434783	1553.66304347826	2078	1605.73304347826	0.811881921602552
RNF20	1690.82608695652	1461.34782608696	1630.01086956522	1603.9347826087	1744.52173913043	1662.20652173913	1642.69565217391	1636.95652173913	1377.27173913043	1563.01086956522	1580.25	1390.76086956522	1441.26086956522	1822.34782608696	1667.58695652174	1331.78260869565	1386.70652173913	1601.71739130435	1591.01086956522	1318.5652173913	1395.4347826087	1490.67391304348	1467.89130434783	1273.21739130435	1459.45652173913	1419.51086956522	1502.76086956522	1451.17391304348	1410.86956521739	1368.0652173913	1630.67391304348	1676.76086956522	1774.71739130435	1551.4347826087	1513.97826086957	1729.21739130435	1615.21739130435	1489.41304347826	1640.4347826087	1802.89130434783	1764.69565217391	1539.17391304348	1669.88043478261	1718.84782608696	1720.3152173913	1536.91304347826	1559.96508695652	0.361237401146808
MBTD1	715.673913043478	900.130434782609	994.760869565217	1022.23913043478	1005.41304347826	985.20652173913	823.695652173913	1073.15217391304	619.021739130435	902.228260869565	876.826086956522	1008.41304347826	606.5	757.239130434783	782.391304347826	950.54347826087	708.782608695652	718.29347826087	786.369565217391	1031.13043478261	596.402173913044	784.260869565217	718.804347826087	884.358695652174	911.184782608696	783.739130434783	938.065217391304	797.347826086957	802.369565217391	879.902173913044	762.836956521739	843.239130434783	781.663043478261	873.239130434783	675.260869565217	644.521739130435	855.79347826087	948.04347826087	824.630434782609	822.217391304348	753.717391304348	995.728260869565	759.869565217391	999.108695652174	960.130434782609	901.673913043478	842.741713043478	0.844100644700242
STK4	1553.04347826087	1606.89130434783	1853.61956521739	1815.83695652174	1778.25	1765.17391304348	1673.21739130435	1803.5	1495.52173913043	1693.0652173913	1802.52173913044	1802.52173913044	1453.52173913043	1550.95652173913	1528.40217391304	1728.60869565217	1490.67391304348	1534.04347826087	1563.26086956522	1664.52173913043	1547.86956521739	1417.5652173913	1542.92391304348	1576.21739130435	1453.0652173913	1413.95652173913	1804.86956521739	1530.86956521739	1420.60869565217	1573.08695652174	1526.45652173913	1534.04347826087	1634.76086956522	1633.47826086957	1466.08695652174	1545	1456.4347826087	1859.45652173913	1479.90217391304	1443.96739130435	1556.59782608696	1826.52173913043	1522.4347826087	1515.22826086957	1692.19565217391	1767.3152173913	1606.47973913043	0.349487798213694
SSBP1	2579.17391304348	2752.23913043478	2708.02173913044	2318.71739130435	2587.36956521739	2758.5	2553.30434782609	2111.84782608696	2934.30434782609	2638.73913043478	2200.92391304348	1948.40217391304	2921.82608695652	3091.72826086957	3427.40217391304	2066.69565217391	2771.0652173913	3088.26086956522	3089.78260869565	1898.5	3054.30434782609	2622.32608695652	2496.17391304348	1886.34782608696	2613.80434782609	2875.97826086957	1431.69565217391	2622.32608695652	2668.4347826087	2267.03260869565	2794.63043478261	2105.19565217391	2060.69565217391	2768.39130434783	2618.91304347826	2802.78260869565	3139.52173913044	2223.95652173913	2870.80434782609	2693.84782608696	2865.20652173913	1994.91304347826	2483.54347826087	2373.0652173913	2334.44565217391	2209.63043478261	2550.53852173913	0.761929289637437
NEDD8	1217.13043478261	1055.95652173913	919.771739130435	945.652173913044	1003.23913043478	1013.05434782609	962.510869565217	1074.54347826087	975.434782608696	956.434782608696	1138.60869565217	960.130434782609	905.315217391304	842.521739130435	730.826086956522	898.695652173913	1059.76086956522	947.804347826087	714.173913043478	1029.69565217391	1095.9347826087	863.195652173913	1107.45652173913	1029.23913043478	956.173913043478	988.141304347826	1328.02173913044	1052.25	966.5	836.554347826087	979.913043478261	857.315217391304	868.260869565217	846.195652173913	884.195652173913	1045.80434782609	1015.25	966.847826086956	947.923913043478	735.173913043478	806.586956521739	1033.63043478261	692.630434782609	976.434782608696	952.717391304348	1018.15217391304	960.907839130435	0.35583317303918
LRBA	1766.20652173913	2096.78260869565	2340.30434782609	2450.71739130435	2440.88043478261	2095.0652173913	1953.46739130435	2529.26086956522	1717.73913043478	2027.33695652174	2142.65217391304	2427.55434782609	1916.54347826087	1968.76086956522	2163.84782608696	2305.80434782609	1839.91304347826	2082.5652173913	2415.02173913044	2534.08695652174	1726.23913043478	2120.5652173913	2227.23913043478	2470.89130434783	2114.44565217391	2229.10869565217	2325.9347826087	1974.32608695652	2277.63043478261	2340.97826086957	2039.97826086957	2074.10869565217	2164.27173913044	2430.70652173913	2179.02173913044	1865.44565217391	1840.51086956522	2503.32608695652	2050.4347826087	1956.78260869565	1818.5652173913	2498.21739130435	1890.8152173913	1933.42391304348	2272.47826086957	2493.80434782609	2152.90780434783	0.86388751233461
RSBN1	615.391304347826	749.336956521739	627.630434782609	808.913043478261	720.608695652174	740.5	631	794.336956521739	665.934782608696	648.184782608696	640.836956521739	803.04347826087	726.315217391304	695.934782608696	669.532608695652	754.304347826087	778.804347826087	644.521739130435	753.847826086957	839.902173913043	593.978260869565	720.684782608696	726.315217391304	854.347826086957	713.880434782609	682.565217391304	760.065217391304	699.54347826087	816.119565217391	899.119565217391	684.760869565217	704.29347826087	692.934782608696	848.826086956522	641.608695652174	611.934782608696	676.04347826087	803.75	688.239130434783	608.652173913044	676.391304347826	806.315217391304	660.934782608696	667.630434782609	637.391304347826	789.95652173913	716.85137173913	0.854761287454209
HTT	1987.78260869565	1782.39130434783	2412.39130434783	2170.14130434783	2634.29347826087	1812.73913043478	2006.09782608696	2217.5	1946.77173913044	1843.25	2117.28260869565	2190.15217391304	1913.30434782609	2038.98913043478	2383.86956521739	2053.65217391304	1908	1975.5	2696.26086956522	2200.11956521739	1772.45652173913	1999.25	2061.17391304348	2028.63043478261	1915.8152173913	2317.78260869565	2103.13043478261	1719.9347826087	1957.21739130435	1999.25	2069.69565217391	1923.65217391304	2150.66304347826	2161.21739130435	2313.80434782609	2253.98913043478	1946.17391304348	2093.79347826087	1980.22826086957	2216.67391304348	2115.76086956522	2258.23913043478	2321.96739130435	1664.52173913043	1900.48913043478	2099.63043478261	2079.03539130435	0.854761287454209
PEAK1	1211.73913043478	1089.89130434783	1564.10869565217	1612.75	1620.38043478261	1220.54347826087	1182.9347826087	1646.69565217391	1193.75	1182.10869565217	1148.67391304348	1466.61956521739	1194.8152173913	996.293478260869	1225.89130434783	1320.15217391304	1127.22826086957	1006.54347826087	1461.01086956522	1413.47826086957	1006	1144.63043478261	1166.0652173913	1364.39130434783	1190.51086956522	1356.45652173913	1376.0652173913	972.086956521739	1183.28260869565	1341.58695652174	1180.51086956522	1144.96739130435	1229.52173913043	1614.63043478261	1387.65217391304	1038.65217391304	1015.25	1540.63043478261	1158.16304347826	1089.60869565217	1022.23913043478	1590.69565217391	973.478260869565	814.304347826087	990.934782608696	1593.0652173913	1247.1953673913	0.342063766253539
CYTH3	1157.0652173913	1111.73913043478	1072.23913043478	891.565217391304	1163.86956521739	1036.23913043478	1150.82608695652	922.891304347826	1961.41304347826	1377.79347826087	1187.30434782609	993.152173913044	1980.8152173913	1547.86956521739	1308.02173913043	1088.01086956522	1592.28260869565	1736.28260869565	1452.82608695652	1169.0652173913	1562.02173913043	1603.02173913044	1362.13043478261	1226.76086956522	1516.89130434783	1396.72826086957	1334.41304347826	1619.82608695652	1329.82608695652	1184.60869565217	1451.86956521739	1474.51086956522	1622.63043478261	1121.45652173913	1621.61956521739	1818.91304347826	1489.95652173913	1001.47826086957	1442.11956521739	1556.09782608696	1723.22826086957	1164.97826086957	1864.32608695652	1358.04347826087	1393.44565217391	1150.61956521739	1375.93031956522	0.280674532404896
MOB1B	1177.9347826087	1260.51086956522	1391.1847826087	1720.3152173913	1378.91304347826	1330.02173913043	1279.10869565217	1695.94565217391	1326.53260869565	1448.73913043478	1465.34782608696	1779.80434782609	1219.88043478261	1012.36956521739	1173.5652173913	1604.83695652174	1498.91304347826	1095.76086956522	1248.04347826087	1695.21739130435	1287.32608695652	1270.95652173913	1236.47826086957	1653.66304347826	1415.45652173913	1263.02173913043	1739.98913043478	1186.60869565217	1380.23913043478	1670.19565217391	1249.78260869565	1329.26086956522	1236.0652173913	1601.17391304348	1105.03260869565	945.815217391304	1247.02173913043	1711.97826086957	1260.51086956522	1085.11956521739	1122.59782608696	1754.9347826087	1016.34782608696	1269.97826086957	1479.34782608696	1690.82608695652	1369.84080869565	0.687887951663988
USP28	1265.19565217391	1373.1847826087	1363.94565217391	1362.71739130435	1355.0652173913	1347.01086956522	1333.10869565217	1406.79347826087	1104.78260869565	1144.39130434783	1037.66304347826	1161.08695652174	930.586956521739	1256.65217391304	1091.91304347826	1189.45652173913	1224.52173913044	1284.69565217391	1118.9347826087	1153.77173913043	1044.76086956522	1205.02173913043	1207.5	1243.45652173913	1211.91304347826	1133.15217391304	1190.14130434783	1160.89130434783	1100.65217391304	1191.40217391304	1196.80434782609	1343.13043478261	1378.22826086957	1350.86956521739	1157.95652173913	1256.46739130435	1360.82608695652	1425.66304347826	1288.60869565217	1263.02173913043	1168.28260869565	1289.02173913043	1171.5	1224.28260869565	1178.79347826087	1184.27173913044	1226.7847826087	0.963449222977221
GFRA1	1873.36956521739	1092.4347826087	1646.69565217391	2311.65217391304	1686.91304347826	1201.65217391304	1493.36956521739	2287.15217391304	2430.70652173913	1544.0652173913	1813.41304347826	2065.86956521739	2716.96739130435	1354.92391304348	1959.3152173913	1934.82608695652	2539.19565217391	1333.36956521739	2220.89130434783	1882.63043478261	2360.17391304348	1648.91304347826	1674.86956521739	1908.25	1547.86956521739	1650.63043478261	1965.0652173913	1378.22826086957	1579.70652173913	1858.78260869565	1543.78260869565	1469.67391304348	1684.3152173913	2232.39130434783	2434.47826086957	1249.78260869565	1383.64130434783	1988.10869565217	1564.45652173913	1663.8152173913	1501.77173913044	2175.73913043478	1780.4347826087	1344.28260869565	1671.95652173913	2246.82608695652	1802.11656521739	0.725634877452078
FBXO7	2183.47826086957	2073.39130434783	1959.02173913043	1777.55434782609	1843.54347826087	1908.25	1929.15217391304	1695.94565217391	2312.94565217391	1978.1847826087	1852.09782608696	1831.97826086957	2299.51086956522	2223.0652173913	2140.65217391304	1875.89130434783	2016.07608695652	2175	1910.58695652174	1669.88043478261	2104.19565217391	2045.84782608696	2025.84782608696	1804.86956521739	1876.28260869565	1937.85869565217	1464.96739130435	2092.42391304348	1951.80434782609	1895.85869565217	2092.80434782609	2163.04347826087	1841.94565217391	1911.46739130435	2105.66304347826	2463.23913043478	2038.98913043478	1857.35869565217	2182.77173913043	1981.45652173913	1989.21739130435	1503.26086956522	2281.10869565217	2052.08695652174	1762.10869565217	1914.95652173913	1978.20960869565	0.893131383311811
OXR1	631.086956521739	751.684782608696	686.347826086957	789.304347826087	687.804347826087	726.315217391304	715.119565217391	779.891304347826	596.282608695652	761.380434782609	744.152173913044	910.021739130435	663.413043478261	564.413043478261	601.282608695652	911.184782608696	715.239130434783	599.630434782609	643.04347826087	893.456521739131	645.891304347826	650.434782608696	675.195652173913	830.347826086956	721.521739130435	755.358695652174	957.108695652174	705.891304347826	737.782608695652	823.336956521739	592.858695652174	692.934782608696	692.934782608696	803.521739130435	578.652173913044	524.934782608696	693.630434782609	877.304347826087	770.576086956522	659.54347826087	615.945652173913	874.217391304348	563.5	828.673913043478	873.456521739131	912.532608695652	726.720458695652	0.800416470086912
RRAGC	739.5	798.195652173913	721.815217391304	1001.26086956522	693.130434782609	852.369565217391	706.086956521739	872.184782608696	1015.5652173913	803.75	773.25	946.260869565217	1268.14130434783	1268.63043478261	1341.10869565217	1090.14130434783	1220.90217391304	1082.95652173913	1496.01086956522	988.630434782609	1048.21739130435	1273.69565217391	948.891304347826	1040.5	1229.32608695652	1087.05434782609	759	1024.5	1231.1847826087	1227.58695652174	853.739130434783	1036.08695652174	954.576086956522	1120.0652173913	1150.82608695652	834.315217391304	889.913043478261	916.021739130435	1025.91304347826	1458.17391304348	1387.86956521739	870.141304347826	1501.1847826087	964.228260869565	755.358695652174	1012.36956521739	1027.83979782609	0.3148362553045
RPRD2	1358.28260869565	1499.9347826087	1603.64130434783	1516.13043478261	1731.23913043478	1454.02173913043	1538.80434782609	1554	1421.51086956522	1659.39130434783	1392.96739130435	1525.39130434783	1322.33695652174	1390.5652173913	1423.08695652174	1412.66304347826	1308.20652173913	1406.15217391304	1415.80434782609	1444.67391304348	1079.0652173913	1466.08695652174	1448.34782608696	1402.65217391304	1444.91304347826	1586.02173913043	1459.69565217391	1397.1847826087	1488.63043478261	1470.23913043478	1391.41304347826	1537.5	1605.63043478261	1718.29347826087	1548.0652173913	1577.91304347826	1513.54347826087	1683.15217391304	1363.94565217391	1449.47826086957	1434.0652173913	1508.32608695652	1374.34782608696	1441.89130434783	1480.23913043478	1487.42391304348	1472.54056521739	0.987939754804783
PSMC2	3300.07608695652	3260.76086956522	2982.21739130435	2204.36956521739	3100.9347826087	3123.65217391304	2992.67391304348	2090.47826086957	3539.69565217391	3532.26086956522	2731.15217391304	2396.80434782609	3115.90217391304	3062.08695652174	2425.21739130435	2374.82608695652	2748.23913043478	3134.4347826087	2196.78260869565	2478.44565217391	3189.08695652174	2999.53260869565	2747.04347826087	2469.19565217391	2631.23913043478	2893.35869565217	1939.69565217391	3252.01086956522	2825.05434782609	2427	3150.15217391304	2765.65217391304	2831.52173913044	2481.32608695652	3078.02173913044	3359.34782608696	3121.23913043478	2487.32608695652	3433.32608695652	2406.91304347826	2719.33695652174	2333	3000.0652173913	3237.5652173913	2659.30434782609	2621.47826086957	2822.82182608696	0.92623822666069
ANKRD26	1023.40217391304	1024.69565217391	1124.16304347826	1352.5	1331.52173913043	1138.60869565217	1091.73913043478	1236.97826086957	1095.28260869565	1149.45652173913	1024.69565217391	1065.98913043478	1078.04347826087	1318.8152173913	1055.95652173913	1053.36956521739	979.413043478261	1108.61956521739	1199.89130434783	1014.02173913043	1094.64130434783	1041.82608695652	1018.69565217391	946.760869565217	1071.15217391304	938.75	892.880434782609	1023.40217391304	1044.76086956522	1148.26086956522	1083.92391304348	1099.9347826087	1040.5	1329.26086956522	1189.13043478261	974.521739130435	1143.26086956522	1284.69565217391	1213.17391304348	1189.63043478261	1047.19565217391	1211.91304347826	1215.89130434783	1055.77173913044	992.54347826087	1220.63043478261	1108.26681521739	0.890987188605415
GSK3A	1072.15217391304	1034.95652173913	1021.21739130435	727.728260869565	883.065217391305	882.54347826087	1015.25	687.45652173913	1003.09782608696	842	774.760869565218	885.956521739131	902.108695652174	926.195652173913	896.086956521739	934.467391304348	831.695652173913	842.413043478261	838.195652173913	874.804347826087	880.021739130435	930.967391304348	935.326086956522	898.695652173913	873.130434782609	881.086956521739	799.239130434783	935.739130434783	877.304347826087	752.260869565217	1044.04347826087	1023.66304347826	1024.17391304348	796.695652173913	1085.65217391304	1191.65217391304	1055.38043478261	756.315217391304	1071.63043478261	1034.60869565217	1135.58695652174	697.076086956522	1077.66304347826	956.804347826087	907.663043478261	794.717391304348	919.418452173913	0.396854543060206
NME4	2222.0652173913	1937.07608695652	1683.71739130435	1679.73913043478	1985.39130434783	1911.13043478261	1978.80434782609	1895.60869565217	1972.30434782609	1821.54347826087	1929.58695652174	1502.59782608696	1804.54347826087	1859.11956521739	1751.55434782609	1370.21739130435	1724.57608695652	2032.15217391304	1783.97826086957	1414.97826086957	2002.21739130435	1781.36956521739	1800.61956521739	1439.5652173913	1746.71739130435	1819.9347826087	1826.52173913043	1966.32608695652	1748.82608695652	1622.89130434783	1855.63043478261	1721.39130434783	1621.36956521739	1526.73913043478	1890.5	1878.91304347826	1591.71739130435	1696.44565217391	1812.73913043478	1576.48913043478	1594.86956521739	1773.80434782609	1775.33695652174	1673.95652173913	1811.79347826087	1781.36956521739	1773.88554347826	0.35583317303918
LACTB	2204.36956521739	2157.53260869565	2093.15217391304	2348.21739130435	2414.5652173913	2270.73913043478	2413.21739130435	2368.13043478261	2892.67391304348	2361.15217391304	2245.66304347826	2592.89130434783	2630.52173913044	2389.39130434783	2140.65217391304	2637.8152173913	2934.30434782609	2302.02173913044	2226.86956521739	2819.83695652174	2908.41304347826	2326.29347826087	2159.21739130435	2788.9347826087	2383.86956521739	2401.95652173913	2418.47826086957	2478.91304347826	2397.91304347826	2349.15217391304	2329.58695652174	2185.94565217391	2306.91304347826	2196	2055.80434782609	2151.08695652174	2348.21739130435	2252.82608695652	2373.57608695652	1840.51086956522	2060.21739130435	2396.39130434783	2211.20652173913	2409.91304347826	1958.64130434783	2391.65217391304	2359.24663043478	0.280674532404896
FDPS	2182.39130434783	1955.84782608696	1794.13043478261	1388.54347826087	1801.88043478261	1956.3152173913	1773.01086956522	1364.71739130435	2183.15217391304	1907.63043478261	1712.9347826087	1254.92391304348	1952.07608695652	1998.47826086957	1822.34782608696	1263.36956521739	1671.0652173913	2226.5	1728.02173913044	1229.52173913043	2038.60869565217	1868.78260869565	1984.17391304348	1186.84782608696	1737.63043478261	1786.64130434783	1152.44565217391	1900.48913043478	1698.0652173913	1381.91304347826	1824.88043478261	1719.53260869565	1617.53260869565	1396.0652173913	1973.5652173913	2374.08695652174	1930.36956521739	1349.73913043478	1904.80434782609	1791.76086956522	1796.83695652174	1281.28260869565	1867.32608695652	1910.85869565217	1782.01086956522	1499.4347826087	1737.44658695652	0.932867368616552
TMEM183A	1020.9347826087	896.706521739131	896.586956521739	901.347826086957	934.891304347826	985.20652173913	1032.89130434783	862	985.543478260869	1002.8152173913	1024.69565217391	818.869565217391	928.978260869565	898.858695652174	916.152173913044	841.326086956522	981.521739130435	933.304347826087	811.239130434783	851.152173913044	967.847826086957	877.304347826087	968.673913043478	780.869565217391	923.815217391304	940.260869565217	871.380434782609	919.771739130435	969.260869565217	932.923913043478	964.489130434782	891.826086956522	890.434782608696	841.326086956522	927.217391304348	1043.39130434783	1020.8152173913	943.847826086957	1030.03260869565	924.45652173913	1008.70652173913	922.891304347826	983.108695652174	971.336956521739	981.521739130435	897.869565217391	933.05222826087	0.508274788764148
FAM217B	772.369565217391	892.086956521739	830.456521739131	917.695652173913	803.04347826087	904.608695652174	773.836956521739	897.989130434783	916.315217391304	855.554347826087	845.021739130435	1107.26086956522	900.891304347826	921.086956521739	932.717391304348	1248.89130434783	1020.8152173913	917.826086956522	979.728260869565	1200	1107.65217391304	1054.65217391304	1018.69565217391	1244.57608695652	1041.82608695652	1087.05434782609	1102.65217391304	1004.33695652174	1092.23913043478	1119.65217391304	824.75	864	861.586956521739	867.04347826087	753.782608695652	743.217391304348	817.565217391304	928.978260869565	837.076086956522	738.913043478261	743.413043478261	856.652173913044	684.978260869565	779.413043478261	797.847826086957	915.130434782609	924.475634782609	0.280674532404896
PPID	1273.32608695652	1173.90217391304	1311.80434782609	1354.92391304348	1343.13043478261	1225.69565217391	1337.46739130435	1460.26086956522	1020.39130434783	1064.5652173913	1254.92391304348	871.097826086957	959.826086956522	1005.71739130435	930.130434782609	849.097826086956	963.891304347826	971.217391304348	998.347826086957	852.369565217391	1085.65217391304	959.021739130435	1051.33695652174	845.021739130435	1038.80434782609	1034.95652173913	1024.85869565217	1017.73913043478	933.597826086956	1011.57608695652	1115.47826086957	1106.54347826087	1138.30434782609	1171.29347826087	901	918.021739130435	974.673913043478	1391.41304347826	1063.69565217391	959.95652173913	1048.21739130435	1474.78260869565	1038.34782608696	1002.8152173913	1186.02173913043	1204.30434782609	1085.20692391304	0.701487486217832
SLC25A11	901.978260869565	963.891304347826	887.630434782609	660.021739130435	869.826086956522	911.184782608696	995.891304347826	589.717391304348	1011.84782608696	892.54347826087	764.141304347826	730.141304347826	1075.25	1062.10869565217	983.836956521739	688.565217391304	907.663043478261	1088.58695652174	774.630434782609	626.782608695652	977.608695652174	953.652173913044	909	681.956521739131	755.597826086957	944.065217391304	498.04347826087	799.239130434783	855.673913043478	628.608695652174	931.804347826087	833.467391304348	956.956521739131	759.326086956522	1058.54347826087	1319.0652173913	1017.91304347826	653.239130434783	1137.63043478261	1130.05434782609	1052.52173913043	650.945652173913	1386.04347826087	901	857.608695652174	731.478260869565	886.245245652174	0.411178312138894
TXNL1	2342.84782608696	2314.26086956522	2124.36956521739	2007.0652173913	2145.26086956522	2301.42391304348	2195.14130434783	1861.52173913043	2163.04347826087	2269.94565217391	2025.51086956522	2105.19565217391	2108.32608695652	2148.78260869565	2028.28260869565	1991.78260869565	2272.91304347826	2194.71739130435	1784.97826086957	1938.97826086957	2327.5	2031.78260869565	2168.67391304348	2062.54347826087	2018.52173913043	2280.64130434783	1671.95652173913	1976.54347826087	2130.85869565217	2066.98913043478	2137.13043478261	2044.33695652174	2077.28260869565	2006.76086956522	1896.10869565217	2204.03260869565	2297.28260869565	2058.5652173913	2145.26086956522	1864.32608695652	1855.15217391304	1922.64130434783	2084.58695652174	2126.82608695652	2014.01086956522	1995.32608695652	2082.39110869565	0.29937308481829
PKP4	2626.6847826087	2743.89130434783	2879.41304347826	2640.79347826087	2663.84782608696	2761.20652173913	2800.28260869565	2428.10869565217	2282.89130434783	2341.65217391304	2344.76086956522	2307.91304347826	2371.19565217391	2514.71739130435	2574.25	2313.34782608696	2450.71739130435	2488.21739130435	2571.58695652174	2235.95652173913	2565.75	2432.23913043478	2402.38043478261	2205.34782608696	2292.0652173913	2466.26086956522	2131.30434782609	2550.73913043478	2636.72826086957	2429.26086956522	2455	2321.25	2528.76086956522	2467.13043478261	2217.84782608696	2324.59782608696	2469.77173913044	2547.97826086957	2397.21739130435	2535.23913043478	2513.76086956522	2473.02173913044	2306.91304347826	2270.73913043478	2424.09782608696	2286.26086956522	2456.37167391304	0.280674532404896
ACAT1	1879.34782608696	1964.60869565217	1774.45652173913	1883	2012.53260869565	1951.80434782609	1831.65217391304	1800.61956521739	2218.33695652174	2246.40217391304	2080.41304347826	1739.52173913044	1830.39130434783	2066.69565217391	1891.46739130435	1737.36956521739	2002.58695652174	2122.9347826087	1762.10869565217	1747.0652173913	2113.26086956522	1924.61956521739	1925.60869565217	1705.34782608696	1929.36956521739	1974.72826086957	1712.16304347826	2045.39130434783	1722.04347826087	1812.0652173913	1868.17391304348	1848.54347826087	1896.38043478261	1979.48913043478	1684.58695652174	2126.82608695652	2043.95652173913	1956.78260869565	2108.32608695652	1780.11956521739	1953.0652173913	1976.89130434783	1986.80434782609	2083.45652173913	2006.45652173913	1887.65217391304	1925.98752173913	0.797625036728949
SYNGR2	1709.1847826087	1538.53260869565	1530.86956521739	1262.67391304348	1258.6847826087	1402.65217391304	1578.77173913043	1214.82608695652	1344.02173913044	1377.79347826087	1503.82608695652	1447.07608695652	1420.60869565217	1336.14130434783	1455.0652173913	1309.34782608696	1287.9347826087	1344.46739130435	1293.10869565217	1233.26086956522	1516.51086956522	1356.95652173913	1552.13043478261	1181.86956521739	1164.19565217391	1423.28260869565	1214.21739130435	1345.47826086957	1357.20652173913	1198.3152173913	1260.51086956522	1378.66304347826	1304.57608695652	1322.13043478261	1581.26086956522	1524.48913043478	1437.76086956522	1214.02173913043	1214.82608695652	1406.60869565217	1543.78260869565	1069.32608695652	1428.67391304348	1445.83695652174	1311.13043478261	1189.63043478261	1365.0487173913	0.445365640450738
GPSM2	596.184782608696	626.108695652174	543.913043478261	632.608695652174	572.391304347826	585.152173913044	594.630434782609	612.608695652174	891.565217391304	679.054347826087	574.260869565217	689.663043478261	1057.25	681	633.978260869565	727.413043478261	896.586956521739	788.04347826087	844.173913043478	841.108695652174	924.217391304348	983.836956521739	955.978260869565	963.032608695652	926.195652173913	936.510869565217	928.065217391304	895.260869565218	870.673913043478	868.695652173913	912.532608695652	854.652173913044	763.739130434783	774.630434782609	885.663043478261	765.326086956522	737.195652173913	710.434782608696	685.282608695652	612.434782608696	637.032608695652	864.760869565218	611.510869565217	692.032608695652	636.130434782609	788.402173913044	766.346176086957	0.660888234478112
MTRR	1002.10869565217	991.804347826087	928.45652173913	1134.41304347826	903.891304347826	947.923913043478	860.467391304348	1164.85869565217	825.760869565217	934.20652173913	1141.61956521739	1140.10869565217	824.369565217391	931.326086956522	1024.85869565217	1100.10869565217	798.195652173913	795.728260869565	921.478260869565	1080.96739130435	824.630434782609	773.836956521739	1051.33695652174	1062.89130434783	823.695652173913	867.184782608696	1105.73913043478	829.347826086957	1032.69565217391	1016.63043478261	866.04347826087	920.010869565217	877.641304347826	1049.4347826087	989.923913043478	909.076086956522	977.826086956522	1046.46739130435	919	952.913043478261	931.478260869565	1070.07608695652	980.565217391304	1135.0652173913	878.076086956522	1013.35869565217	964.29562826087	0.967376992947144
TLK2	917.434782608696	968.673913043478	805.25	908.065217391304	897.869565217391	866.684782608696	923.5	940.347826086957	1157.21739130435	1041.6847826087	984.956521739131	1016.1847826087	1092.23913043478	964.228260869565	956.956521739131	911.184782608696	969.869565217391	1047.19565217391	1095.58695652174	966.847826086956	982.315217391304	991.673913043478	925.652173913043	1035.90217391304	954.217391304348	1060.02173913043	1055.05434782609	977.510869565217	933.597826086956	908.326086956522	987.206521739131	932.717391304348	933.913043478261	945.206521739131	1057.25	1008.54347826087	1017.30434782609	880.423913043478	911.760869565217	952.913043478261	880.663043478261	969.869565217391	926.195652173913	915.130434782609	868.413043478261	982.597826086957	965.790386956522	0.687887951663988
VPS51	1638.73913043478	1643.89130434783	1506.17391304348	1112.10869565217	1499.6847826087	1586.02173913043	1649.32608695652	1073.15217391304	1517.47826086957	1528.8152173913	1197.78260869565	1186.15217391304	1475.4347826087	1536.41304347826	1440.5	1239.35869565217	1383.82608695652	1630.82608695652	1361.08695652174	1296.5	1612.4347826087	1583.6847826087	1392.96739130435	1299.57608695652	1544.34782608696	1517.47826086957	1078.9347826087	1728.60869565217	1510	1429.84782608696	1501.1847826087	1437.76086956522	1465.57608695652	1378.22826086957	1631.36956521739	1673.46739130435	1444.4347826087	1206.52173913043	1402.15217391304	1553.04347826087	1461.60869565217	1101	1498.91304347826	1497.34782608696	1423.92391304348	1335.20652173913	1439.4107173913	0.961997517770803
NDUFS8	2251.28260869565	2020.26086956522	1938.61956521739	1376.0652173913	2022.54347826087	2033.75	2327.5	1193.01086956522	2518.80434782609	1763.09782608696	1445.5652173913	1078.55434782609	2514.71739130435	2792.01086956522	2505.13043478261	1203.41304347826	2143.63043478261	2748.23913043478	2119.76086956522	1022.23913043478	2426.41304347826	2346.65217391304	1975.13043478261	1020.54347826087	1630.97826086957	1910.13043478261	801.75	1967.73913043478	1941.4347826087	1585.5652173913	2396.39130434783	2052.89130434783	2170.52173913044	1821.54347826087	2672.21739130435	2922.42391304348	2231	1433.39130434783	2655.97826086957	2735.45652173913	2416.63043478261	1070.07608695652	2768.96739130435	1904.80434782609	1849.20652173913	1430.71739130435	1981.66834782609	0.611963499873645
PUM3	1986.46739130435	1779.5652173913	1895.85869565217	1946.17391304348	1988.10869565217	1981.0652173913	2066.69565217391	1813.41304347826	1944.80434782609	2048.66304347826	2051.41304347826	1989.60869565217	2227.71739130435	2265.11956521739	2287.15217391304	1950.71739130435	2108.32608695652	2306.91304347826	2056.76086956522	1724.13043478261	2263.45652173913	2008.25	2024.23913043478	1754.9347826087	1787.21739130435	2031.58695652174	1448.34782608696	1913.30434782609	1927.44565217391	1701.8152173913	2004.10869565217	1759.63043478261	1816.17391304348	1984.17391304348	1987.13043478261	2121.30434782609	2051.75	1889.38043478261	2023.67391304348	2002.58695652174	1971.47826086957	1738.82608695652	2142.65217391304	1688.91304347826	1436.63043478261	1699.32608695652	1947.76104347826	0.280674532404896
TPP2	2084.23913043478	2383.30434782609	2305.80434782609	2799.10869565217	2179.02173913044	2526.78260869565	2330.47826086957	2731.15217391304	1853.19565217391	2007.0652173913	2081.34782608696	2250.32608695652	1910.85869565217	2309.09782608696	2483.54347826087	2251.78260869565	1925.30434782609	2116.09782608696	2396.80434782609	2247.54347826087	1918.38043478261	2247.54347826087	2066.69565217391	2124.79347826087	2107.32608695652	1892.17391304348	2071.5	1987.45652173913	2075.34782608696	2081.72826086957	2305.80434782609	2250.78260869565	2224.34782608696	2650.91304347826	2262.91304347826	2219.78260869565	2492.52173913044	2629.3152173913	2445.54347826087	2836.08695652174	2732.72826086957	2467.73913043478	2787.41304347826	2354.82608695652	2558.52173913044	2419.45652173913	2290.96736956522	0.280674532404896
ALG3	668.228260869565	720.054347826087	734.326086956522	931.173913043478	582.326086956522	845.20652173913	716.391304347826	903.891304347826	698.152173913044	613.173913043478	748.369565217391	892.54347826087	784.163043478261	910.413043478261	1126.53260869565	923.326086956522	747.739130434783	748.217391304348	1062.89130434783	791.413043478261	722.608695652174	759.54347826087	833.065217391305	848.434782608696	770.95652173913	824.184782608696	770.29347826087	689.782608695652	885.010869565218	825.608695652174	692.630434782609	798.065217391304	810.695652173913	909.891304347826	788.173913043478	780	839.217391304348	889.79347826087	842.521739130435	1204.60869565217	1116.73913043478	813.413043478261	1069.91304347826	875.782608695652	845.021739130435	819.423913043478	829.867676086957	0.280674532404896
COX7C	2913.46739130435	2782.58695652174	2653.44565217391	2414.5652173913	2662.08695652174	2688.39130434783	2542.13043478261	2375.22826086957	2665.17391304348	2991.34782608696	2595.27173913044	2315.53260869565	2522.32608695652	2772.08695652174	2628.82608695652	2323.39130434783	2569.4347826087	2584.97826086957	2314.26086956522	2344.3152173913	2660.96739130435	2397.21739130435	2270.73913043478	2269.94565217391	2628.82608695652	2452.30434782609	2333.51086956522	2792.01086956522	2574.25	2550.73913043478	2719.33695652174	2750.95652173913	2371.19565217391	2554.36956521739	2481.32608695652	2628.82608695652	2482.76086956522	2330.91304347826	2831.52173913044	2597.46739130435	2670.9347826087	2293.84782608696	3003.69565217391	3201.32608695652	2830.34782608696	2612.65217391304	2585.88776086957	0.426360589993057
SREBF2	2045.05434782609	2135.45652173913	2009.69565217391	1519.63043478261	1965.71739130435	1930.66304347826	1944.80434782609	1560.73913043478	1640.4347826087	1820.65217391304	1644.79347826087	1741.36956521739	1605.63043478261	1908.5	1937.45652173913	1751.89130434783	1533.69565217391	1993.34782608696	1972.58695652174	1615.21739130435	1551.21739130435	1917.97826086957	1904	1787.21739130435	1900.48913043478	1886.97826086957	1695.94565217391	2035.21739130435	1815.83695652174	1649.11956521739	1756.65217391304	1993.73913043478	1903.10869565217	1721.13043478261	2175.73913043478	2329.58695652174	1954.54347826087	1608.53260869565	1967.73913043478	2168.67391304348	2312.09782608696	1524.95652173913	2110.69565217391	2205.64130434783	2022.54347826087	1793.55434782609	1868.91889130435	0.280674532404896
TBX18	1808.35869565217	2157.53260869565	2014.01086956522	2361.86956521739	1969.13043478261	2152.23913043478	1888.5652173913	2394.26086956522	2281.51086956522	1935.23913043478	2028.28260869565	2385.76086956522	1946.77173913044	1723.84782608696	1856.32608695652	2366.95652173913	2179.02173913044	1649.60869565217	1878.91304347826	2330.03260869565	1684.58695652174	1957.21739130435	1976.54347826087	2572.02173913044	2293.3152173913	2165.80434782609	2879.41304347826	2133.02173913044	2470.34782608696	2638.23913043478	1972.30434782609	2006.45652173913	2084.58695652174	2607.82608695652	1865.44565217391	1702.13043478261	2095.0652173913	2805.54347826087	2081.34782608696	2223.51086956522	2055.80434782609	2526.28260869565	1655.71739130435	2347.78260869565	2289.64130434783	2549.34782608696	2151.03358695652	0.526298985243483
UBAP2	776.326086956522	859.869565217391	997.945652173913	831.826086956522	993.315217391304	771.434782608696	924.217391304348	815.076086956522	1206.38043478261	893.989130434783	993.478260869565	886.891304347826	1133.73913043478	1020.69565217391	1008.54347826087	974.934782608696	1201.30434782609	1130.97826086957	1174.27173913043	1004.64130434783	1046.89130434783	1187.30434782609	1205.02173913043	1041.41304347826	1258.6847826087	1122.27173913044	1217.33695652174	1153.77173913043	1141.39130434783	1081.82608695652	999.413043478261	1042.13043478261	1239.17391304348	880.423913043478	956.619565217391	1143.69565217391	1146.52173913043	914.978260869565	1018.3152173913	1017.30434782609	1068.42391304348	1036.94565217391	994.184782608696	1055.77173913044	1076.45652173913	874.804347826087	1033.06379130435	0.368101460265203
DBR1	684.54347826087	717.565217391304	650	950.326086956522	640.326086956522	721.413043478261	707.858695652174	991.804347826087	849.097826086956	766.608695652174	868.413043478261	869.565217391304	674.554347826087	749.336956521739	750.347826086957	873.967391304348	835.021739130435	642.695652173913	819.826086956522	712.739130434783	734.173913043478	643.934782608696	700.597826086957	834.5	806.717391304348	740.260869565217	886.25	672.239130434783	778.076086956522	857.315217391304	616.869565217391	718.119565217391	741.184782608696	863.45652173913	656.739130434783	619.326086956522	732.347826086957	895.065217391304	690.695652173913	620.760869565217	670.065217391304	855.673913043478	662.369565217391	694.54347826087	708.576086956522	800.04347826087	753.824195652174	0.368101460265203
PRKCI	2399.0652173913	2470.89130434783	2412.39130434783	3018.02173913044	2401.95652173913	2412.84782608696	2365.95652173913	3084.89130434783	1806.38043478261	2155.4347826087	2300	2891.98913043478	2274.02173913044	2070.77173913044	2266.45652173913	2854.53260869565	2293.84782608696	2046.17391304348	2377.4347826087	2715.02173913044	2128.38043478261	2233.58695652174	2170.52173913044	2666.41304347826	2221.47826086957	2179.02173913044	2578.03260869565	2093.79347826087	2284.0652173913	2606.13043478261	2199.25	2587.9347826087	2455.88043478261	2853.91304347826	2253.21739130435	1845.47826086957	2311.14130434783	3018.02173913044	2366.95652173913	2259.95652173913	2296.52173913044	2779.15217391304	2241.32608695652	2449.58695652174	2456.28260869565	2879.97826086957	2413.785	0.983691772421163
NKAP	722.5	694.717391304348	780.369565217391	714.065217391304	837.076086956522	753.369565217391	823.695652173913	643.369565217391	802.706521739131	716.804347826087	706.217391304348	536.5	882.391304347826	1151.76086956522	1057.91304347826	624.467391304348	876.95652173913	883.260869565218	868.902173913044	531.304347826087	793.79347826087	792.086956521739	741.739130434783	555.423913043478	697.576086956522	805.25	492.554347826087	718.54347826087	711.739130434783	574.54347826087	811.75	790.510869565217	903.673913043478	664.771739130435	885.663043478261	1032.08695652174	905.478260869565	645.326086956522	955.630434782609	1276.41304347826	1116.73913043478	601.434782608696	1355.25	821	746.630434782609	631.086956521739	796.413989130435	0.292122882576362
PUDP	1388.54347826087	1485.32608695652	1325.63043478261	1466.36956521739	1389.26086956522	1519.02173913043	1385.46739130435	1412.80434782609	1285.72826086957	1281	1332.39130434783	1572.59782608696	1354.78260869565	1201.47826086957	1214.21739130435	1505.88043478261	1401.26086956522	1196.23913043478	1219	1446.27173913044	1405.30434782609	1244.57608695652	1325.82608695652	1668.89130434783	1308.78260869565	1402.15217391304	1329.26086956522	1266.82608695652	1420.60869565217	1445.35869565217	1368.80434782609	1360.45652173913	1366.61956521739	1412.25	1318.39130434783	1245.54347826087	1299.07608695652	1466.86956521739	1325.82608695652	1123.77173913043	1366.89130434783	1571.51086956522	1247.41304347826	1461.60869565217	1462.17391304348	1649.32608695652	1374.94326086957	0.927072517886999
TLE1	1220.63043478261	1213	1159.69565217391	1066.45652173913	1271.41304347826	1110.82608695652	1400.73913043478	1035.90217391304	1198.45652173913	1279.28260869565	1216.9347826087	1249.5652173913	1194.8152173913	1210.52173913043	1248.89130434783	1207	1041.82608695652	1057.5652173913	1077	1044.76086956522	1206.38043478261	981.739130434783	1004.21739130435	1038.34782608696	969.086956521739	1077.34782608696	1055.05434782609	1063.54347826087	1064.80434782609	996.532608695652	1121.84782608696	1073.15217391304	1160.69565217391	1056.39130434783	1154.19565217391	1398.9347826087	1095.9347826087	1092.07608695652	1254.15217391304	1234.47826086957	1410.15217391304	1148.10869565217	1342.36956521739	1197.25	1221.67391304348	1043.07608695652	1151.4527326087	0.872319697382226
ENY2	1406.15217391304	1509.07608695652	1349.9347826087	1452.13043478261	1341.58695652174	1527.23913043478	1491.26086956522	1427.6847826087	1923.94565217391	1710.17391304348	1691.22826086957	1669.22826086957	1814	2066.69565217391	1839.91304347826	1786.64130434783	1577.19565217391	2049.41304347826	1644.20652173913	1519.32608695652	1730.63043478261	1690	1536.41304347826	1581.89130434783	1662.73913043478	1666.76086956522	1507.71739130435	1682.10869565217	1688.91304347826	1697.09782608696	1457.34782608696	1461.34782608696	1429.54347826087	1518.77173913043	1447.26086956522	1814.52173913043	1684.3152173913	1415.45652173913	1820.96739130435	1858.78260869565	1871.53260869565	1274.47826086957	2129.36956521739	1646.98913043478	1494.41304347826	1362.71739130435	1628.89391304348	0.82327002580343
PGRMC2	3057.91304347826	3155.42391304348	3198.29347826087	2967.65217391304	3046	3365.0652173913	3084.89130434783	2997.58695652174	2131.30434782609	2847.48913043478	3044.32608695652	3318.30434782609	2130.41304347826	2584.97826086957	2333	3192.73913043478	2439.39130434783	2440.88043478261	2260.84782608696	3288.26086956522	2629.3152173913	2468.34782608696	2361.15217391304	3056.39130434783	2607.82608695652	2384.86956521739	3106.52173913044	2733.34782608696	2643.71739130435	2708.02173913044	2555.34782608696	2634.29347826087	2681.91304347826	2907.73913043478	2187.0652173913	2143.63043478261	2389.86956521739	3080.48913043478	2693.84782608696	2336.9347826087	2581.29347826087	3050.98913043478	2516.42391304348	2976.5652173913	3186.89130434783	3228.97826086957	2755.14215217391	0.563639087549767
KLHL28	682.369565217391	782.152173913044	773.434782608696	824.184782608696	784.565217391304	753.369565217391	662.054347826087	865.760869565217	811.021739130435	871.54347826087	909.891304347826	916.619565217391	834.315217391304	697.358695652174	742.869565217391	813.586956521739	819.347826086957	680.869565217391	913.239130434783	875.641304347826	738.815217391304	775.29347826087	850.173913043478	919.771739130435	970.478260869565	908.326086956522	968.478260869565	869.271739130435	901.097826086957	1099.19565217391	683.369565217391	845.934782608696	775.29347826087	758.054347826087	676.771739130435	653.565217391304	690.554347826087	895.065217391304	735.413043478261	636.869565217391	607.45652173913	918.652173913044	700.152173913044	843.804347826087	833.304347826087	873.130434782609	807.44542173913	0.792908622239411
STX6	1533.36956521739	1334.58695652174	1284.41304347826	1429.54347826087	1262.02173913043	1298.84782608696	1335.41304347826	1565.52173913043	1137.15217391304	1261.15217391304	1484.41304347826	1392.4347826087	1217.76086956522	936.869565217391	1066.86956521739	1131.76086956522	1139.76086956522	887.467391304348	1138.73913043478	1137.3152173913	1211.55434782609	1038.90217391304	1102.65217391304	1167	1056.09782608696	1105.73913043478	1294.82608695652	1084.89130434783	1147.01086956522	1182.10869565217	1136.78260869565	1146.52173913043	1146.67391304348	1292.6847826087	1300.78260869565	1018.82608695652	1123.17391304348	1337.69565217391	1140.67391304348	1091.36956521739	1181.30434782609	1443.23913043478	1060.13043478261	1149	1391.1847826087	1511.30434782609	1213.85967391304	0.606744119727504
FIBP	825.347826086957	902.347826086956	898.25	723.54347826087	800.934782608696	781.130434782609	891.336956521739	669.108695652174	939.076086956522	855.554347826087	747.413043478261	620.282608695652	886.413043478261	1178.79347826087	1096.17391304348	653.239130434783	841.706521739131	1051.82608695652	941.847826086956	547.782608695652	938.065217391304	870.673913043478	738.652173913044	619.260869565217	795.5	803.521739130435	550.652173913044	867.934782608696	753.54347826087	751.228260869565	872.065217391304	846.826086956522	872.858695652174	748.956521739131	833.695652173913	998.934782608696	824	628.54347826087	876.228260869565	1259.23913043478	1004.97826086957	656.152173913044	1026.96739130435	849.391304347826	778.706521739131	659.902173913044	832.143167391304	0.82210396196003
IAH1	1923	1865.78260869565	1659.67391304348	1392.96739130435	1743.30434782609	1826.19565217391	1774.45652173913	1321.44565217391	2555.86956521739	1987.45652173913	1621.86956521739	1350.52173913043	2327.5	2338.78260869565	1914.95652173913	1377.79347826087	2081.34782608696	2351.65217391304	1563.26086956522	1316.5	2108.02173913044	2066.28260869565	1938.26086956522	1324.0652173913	1947.36956521739	1842.63043478261	1254.57608695652	2088.5	1765.17391304348	1614.63043478261	2089.98913043478	2050.4347826087	1935.59782608696	1649.32608695652	2225.5652173913	3078.02173913044	2198.36956521739	1640.10869565217	2312.94565217391	2089.98913043478	2175.36956521739	1491.48913043478	2326.29347826087	2175.36956521739	1736.5652173913	1677.86956521739	1893.41645652174	0.318564595977545
CLOCK	1384.9347826087	1364.71739130435	1484.41304347826	1829.30434782609	1603.02173913044	1395.26086956522	1196.80434782609	1852.8152173913	1181.16304347826	1350.86956521739	1446.89130434783	1606.64130434783	1133.73913043478	1131.10869565217	1278.26086956522	1434.20652173913	1164.85869565217	1139.58695652174	1542.92391304348	1551.21739130435	1092.84782608696	1205.02173913043	1321.02173913043	1430.48913043478	1273.4347826087	1319.25	1526.45652173913	1149.45652173913	1266.58695652174	1387.86956521739	1360.64130434783	1360.45652173913	1231.1847826087	1644.52173913043	1352.25	1045.80434782609	1123.17391304348	1696.44565217391	1135.8152173913	1269.28260869565	1130.84782608696	1728.02173913044	1192.82608695652	1232.26086956522	1278.85869565217	1810.55434782609	1361.69832608696	0.6021756607113
RPL39	1330.02173913043	1391.66304347826	1329.82608695652	1495.52173913043	1293.55434782609	1425.13043478261	1293.55434782609	1829.30434782609	1763.09782608696	1397.41304347826	1815.26086956522	1226.76086956522	1122.4347826087	971.217391304348	1120.0652173913	1196.45652173913	1359.71739130435	1012.16304347826	860.608695652174	1685.48913043478	1468.15217391304	1074.70652173913	1122.96739130435	1418.86956521739	1081.29347826087	1209.23913043478	2003.71739130435	1254.36956521739	1130.84782608696	1120.82608695652	1318.5652173913	1231.1847826087	1216.73913043478	1143.69565217391	960.847826086957	984.826086956522	1172.19565217391	1257.34782608696	1140.67391304348	887.869565217391	1046.13043478261	1287.71739130435	736.29347826087	1596.80434782609	1247.21739130435	1231.5	1266.60558913043	0.280674532404896
RRAS2	1365.05434782609	1089.89130434783	1043.58695652174	1456.86956521739	1067.15217391304	1070.23913043478	1182.9347826087	1559.52173913043	1396.5	1289.20652173913	1392.96739130435	1332.61956521739	1519.02173913043	1065.30434782609	1137.78260869565	1349.5	1527.23913043478	1069.47826086957	1267.15217391304	1477.78260869565	1506.96739130435	1232.41304347826	1333.36956521739	1482.39130434783	1273.4347826087	1337.80434782609	1552.76086956522	1188.13043478261	1307.13043478261	1393.76086956522	1150.61956521739	1050.63043478261	1116.39130434783	1398.9347826087	1347.82608695652	842.413043478261	972.521739130435	1249.34782608696	981.065217391304	831.565217391304	923.021739130435	1498.65217391304	853.260869565217	1161.83695652174	1124.45652173913	1602	1247.22849347826	0.293202524988056
CACUL1	2173.97826086957	2205.9347826087	2229.10869565217	2441.28260869565	2258.63043478261	2212.47826086957	2093.79347826087	2359.15217391304	1831.65217391304	2200.92391304348	2327.07608695652	2531.75	2090.47826086957	1871.53260869565	2084.23913043478	2609.04347826087	2328.52173913044	1946.17391304348	2306.91304347826	2657.58695652174	2210.89130434783	2114.86956521739	2308.63043478261	2651.40217391304	2239.91304347826	2196.4347826087	2652.97826086957	2253.60869565217	2342.84782608696	2467.73913043478	2030.9347826087	2199.73913043478	2222.5652173913	2299.02173913044	1929.36956521739	1876.28260869565	2106.9347826087	2606.13043478261	1901.86956521739	1873.89130434783	2033.75	2486.21739130435	1831.65217391304	2048.23913043478	2352.56521739131	2361.15217391304	2225.21476086957	0.504233361886034
KIF3A	1889.04347826087	1897.5	2053.92391304348	2400.80434782609	1932.79347826087	2086	1846.69565217391	2338.10869565217	1583.91304347826	1815.02173913043	1871.53260869565	2023.10869565217	1797.32608695652	1558.1847826087	2008.25	1910.58695652174	1873.01086956522	1550.44565217391	2232.89130434783	2118.9347826087	1852.8152173913	1752.07608695652	1562.02173913043	1945.14130434783	1731.86956521739	1612.04347826087	1869.10869565217	1484.41304347826	1791.04347826087	1999.25	1753.94565217391	1805.36956521739	1759.63043478261	2496.17391304348	1906.39130434783	1280.30434782609	1573.34782608696	2439.9347826087	1611.09782608696	1696.67391304348	1636.95652173913	2184.80434782609	1664.52173913043	1701.25	1931.29347826087	2477.97826086957	1876.2507173913	0.677167361450778
STC1	1157.95652173913	782.152173913044	1003.73913043478	843.95652173913	935.934782608696	920.347826086956	1174.80434782609	937.108695652174	1846.69565217391	1178.57608695652	1310.92391304348	1158.36956521739	2079.04347826087	1047.19565217391	1134.55434782609	1122.10869565217	1658.16304347826	1069.47826086957	1359.47826086957	1118.9347826087	1917.34782608696	1259.23913043478	1559.08695652174	1250.63043478261	1189.45652173913	1296.14130434783	1330.69565217391	1141.19565217391	1492.89130434783	1271.41304347826	1463.84782608696	1084.71739130435	1179.5	1119.36956521739	1793.82608695652	939.358695652174	1079.34782608696	984.239130434783	1236.97826086957	896.260869565217	1068.42391304348	1628.73913043478	1346.76086956522	972.521739130435	1304.32608695652	1688.63043478261	1246.40146521739	0.660888234478112
PDE3A	1554.67391304348	1980.8152173913	1936.32608695652	2383.86956521739	2284.54347826087	2181.02173913044	1680.9347826087	2247.54347826087	1618.58695652174	1981.0652173913	2095.54347826087	2344.3152173913	1281	2044.33695652174	2184.80434782609	2343.35869565217	1565.02173913043	1546.5652173913	1922.28260869565	2092.80434782609	1305.76086956522	1523.67391304348	1713.28260869565	1868.78260869565	1986.13043478261	1883.3152173913	2198.36956521739	1696.21739130435	2015.04347826087	2188.08695652174	1681.52173913043	1801.27173913044	1989.60869565217	2238.17391304348	1398.45652173913	1451.60869565217	1806.38043478261	2529.73913043478	1975.13043478261	1846.69565217391	1834.89130434783	2408.84782608696	1944.10869565217	2028.28260869565	1992.95652173913	2217.84782608696	1930.29563043478	0.967376992947144
BRI3	925.04347826087	940.032608695652	873.826086956522	643.771739130435	909.076086956522	847.586956521739	848.032608695652	632.521739130435	1175.17391304348	958.04347826087	659.413043478261	601.195652173913	1000.44565217391	868.554347826087	927.217391304348	628.760869565217	827.673913043478	932.04347826087	712.663043478261	575.021739130435	1036.23913043478	902.739130434783	779.413043478261	607.695652173913	741.739130434783	809.304347826087	461.358695652174	807.95652173913	778.076086956522	727.673913043478	810.804347826087	766.54347826087	801.5	776.913043478261	957.717391304348	1162.66304347826	941.978260869565	675.195652173913	1011.26086956522	770.054347826087	928.45652173913	520.326086956522	726.054347826087	887.75	769.260869565218	687.358695652174	811.568056521739	0.86388751233461
SUPV3L1	1347.82608695652	1282.19565217391	1323.8152173913	1397.1847826087	1234.28260869565	1267.75	1247.21739130435	1381.16304347826	1557.84782608696	1380.23913043478	1407.91304347826	1270.44565217391	1354.78260869565	1333.78260869565	1294.5652173913	1313.52173913043	1272.5	1283.02173913043	1194.46739130435	1156.91304347826	1299.07608695652	1256.90217391304	1273.95652173913	1183.28260869565	1305.21739130435	1344.46739130435	1187.52173913043	1353.78260869565	1366.89130434783	1242.26086956522	1397.64130434783	1289.64130434783	1355.25	1464.23913043478	1375.90217391304	1449.76086956522	1373.4347826087	1423.52173913044	1493.9347826087	1200.36956521739	1256.65217391304	1449.76086956522	1255.73913043478	1383.82608695652	1293.76086956522	1481.57608695652	1327.38708695652	0.477208054346999
FRMD6	2380.26086956522	1750.34782608696	1968.0652173913	2352.56521739131	2059.34782608696	1642.91304347826	2016.39130434783	2515.89130434783	3639.10869565217	2341.65217391304	2765.15217391304	2813.72826086957	4068.61956521739	2193.10869565217	2493.80434782609	3048.3152173913	3721.47826086957	2223.51086956522	2519.20652173913	3112.02173913044	3702.69565217391	2704.5652173913	3065.26086956522	3469.91304347826	2656.97826086957	2787.41304347826	3320.26086956522	2553.91304347826	3004.90217391304	2993.41304347826	2744.65217391304	2343.86956521739	2400.80434782609	3102.5	2987.95652173913	1935.59782608696	2318.71739130435	2647.08695652174	2389.39130434783	1708.84782608696	2051.75	3043.65217391304	2158.10869565217	1984.69565217391	2100.47826086957	3032.9347826087	2626.86626086957	0.800453726178888
SPATA20	1668.23913043478	1551.65217391304	1481.34782608696	963.891304347826	1402.65217391304	1546.5652173913	1589.28260869565	914.108695652174	1615.52173913043	1683.71739130435	1486.15217391304	1019.80434782609	1597.69565217391	1723.84782608696	1465.80434782609	1114.59782608696	1282.19565217391	1939.33695652174	1388.09782608696	1051.15217391304	1561.04347826087	1680.23913043478	1374.13043478261	971.597826086957	1601.17391304348	1080.96739130435	1052.39130434783	1579.70652173913	1354.78260869565	1134.1847826087	1575.20652173913	1563.01086956522	1309.34782608696	1250.38043478261	1749.69565217391	1901.0652173913	1502.59782608696	1070.76086956522	1439.27173913043	1802.89130434783	1728.91304347826	815.478260869565	1744.1847826087	1532.5652173913	1484	934.760869565218	1419.13067391304	0.881974973452922
RBAK	996.010869565218	1165.20652173913	1074.39130434783	1111.34782608696	1072.8152173913	1103.51086956522	978.467391304348	1137.78260869565	1109.45652173913	1101.57608695652	1175.92391304348	1136.63043478261	1109.19565217391	917.923913043478	911.760869565217	1211.73913043478	1141.84782608696	1061.23913043478	1050.98913043478	1353.58695652174	1012.46739130435	1139.58695652174	1295.55434782609	1313.52173913043	1185.80434782609	1253.17391304348	1288.38043478261	1202.08695652174	1243.63043478261	1410.41304347826	1175.34782608696	1181.63043478261	1052.52173913043	1230.45652173913	1025.67391304348	1058.71739130435	1148.67391304348	1231.5	1074.86956521739	1037.47826086957	895.586956521739	1197.25	969.402173913043	1123.5652173913	1060.13043478261	1105.96739130435	1126.84331086957	0.961997517770803
CTBP1	2444.45652173913	2263.45652173913	2225.5652173913	2017.19565217391	2356.54347826087	2244.92391304348	2449.07608695652	2116.4347826087	2560.52173913044	2287.54347826087	2517.97826086957	1901.39130434783	2572.45652173913	2810.69565217391	2571.58695652174	1864.32608695652	2289.15217391304	2644.30434782609	2508.45652173913	1803.85869565217	2480.97826086957	2316.42391304348	2345.63043478261	1830.02173913043	2390.30434782609	2275.48913043478	2236.32608695652	2324.9347826087	2284.0652173913	2107.32608695652	2372.15217391304	2308.27173913044	2290.13043478261	1884.72826086957	2528.76086956522	2781.26086956522	2261.25	2027.08695652174	2409.91304347826	2659.30434782609	2613.22826086957	2077.28260869565	2746.58695652174	2380.82608695652	2306.91304347826	2023.39130434783	2319.83717391304	0.74264533560088
ZNF644	1754.26086956522	1908	1769.88043478261	1750.96739130435	1895.85869565217	1932.39130434783	1737.89130434783	1760.30434782609	2568.45652173913	1976.20652173913	1896.38043478261	1962.01086956522	2656.97826086957	2201.34782608696	2019.95652173913	2245.34782608696	2873.96739130435	2500.02173913044	2258.63043478261	2535.77173913044	2522.71739130435	2660.47826086957	2675.33695652174	2517.46739130435	2602.30434782609	2608.5	2383.30434782609	2539.19565217391	2550.73913043478	2511.03260869565	2351.65217391304	2303.78260869565	2397.91304347826	2212.47826086957	2281.10869565217	2244.07608695652	2399.0652173913	2155.4347826087	2204.03260869565	1824.88043478261	1873.36956521739	2228.65217391304	1848.21739130435	2215.28260869565	2122.5652173913	2197.97826086957	2231.22160869565	0.611963499873645
NDUFS2	1403.22826086957	1182.9347826087	1211.91304347826	1024.85869565217	1286	1175.17391304348	1184.27173913044	995.076086956522	1213.58695652174	1318.39130434783	1302.73913043478	1143.26086956522	1256.08695652174	1180.63043478261	1163.73913043478	1172.19565217391	1057.25	1302.05434782609	1137.47826086957	987.347826086956	1190.14130434783	1181.63043478261	1101.57608695652	1023.13043478261	1196.23913043478	1087.05434782609	1039.95652173913	1326.53260869565	1072.8152173913	1012.73913043478	1227.58695652174	1273.08695652174	1267.89130434783	999.260869565217	1330.45652173913	1337.23913043478	1176.27173913044	991.195652173913	1214.82608695652	1340.26086956522	1346.28260869565	1093.63043478261	1464.23913043478	1416.13043478261	1249.78260869565	1102.89130434783	1190.45790217391	0.411178312138894
RETREG2	1355.72826086957	1225.69565217391	1220.63043478261	1127.59782608696	1121.65217391304	1149.26086956522	1207.5	1082.95652173913	1171.66304347826	1082.5652173913	1207	1096.84782608696	1130.42391304348	1273.21739130435	1110.58695652174	1047.34782608696	1063.69565217391	1236.27173913043	1163.73913043478	1045.80434782609	1110.20652173913	1141.61956521739	1095.76086956522	1041.41304347826	1149.13043478261	1078.80434782609	1125.65217391304	1157.58695652174	1086.47826086957	1052.52173913043	1101.67391304348	1233.47826086957	1232.26086956522	1054.79347826087	1195.16304347826	1299.30434782609	1129.47826086957	1024.69565217391	1051.52173913043	1264.30434782609	1259.23913043478	1073.32608695652	1281.76086956522	1264.04347826087	1171.5	1056.89130434783	1148.97373913044	0.872319697382226
SRSF8	668.228260869565	638.391304347826	659.29347826087	787.532608695652	599.521739130435	637.891304347826	626.586956521739	836.076086956522	606.260869565218	638.239130434783	792.260869565217	849.097826086956	589.413043478261	641.173913043478	739.978260869565	833.467391304348	661.826086956522	530.086956521739	800.260869565217	906.489130434783	633.891304347826	628.54347826087	677.54347826087	840.336956521739	714.608695652174	742.728260869565	1064.5652173913	693.75	669.271739130435	836.554347826087	631.847826086957	726.565217391304	775.739130434783	674.934782608696	586.434782608696	493.163043478261	604.869565217391	794.097826086957	701.380434782609	759	776.717391304348	929.945652173913	776.913043478261	773.597826086957	827.45652173913	852.695652173913	722.374523913044	0.409471920293405
WDR33	1992.19565217391	1966.67391304348	2028.63043478261	1919.4347826087	2215.28260869565	1923.94565217391	2026.80434782609	1867.32608695652	1972.30434782609	2053.92391304348	2011.39130434783	1922.01086956522	1847.86956521739	1908.5	2043.63043478261	1921.73913043478	1916.08695652174	1971.89130434783	1956.3152173913	1972.86956521739	2070.39130434783	1898.73913043478	2132.0652173913	1913.73913043478	1974.72826086957	1996.63043478261	1880.80434782609	1910.85869565217	2042.92391304348	2006.45652173913	1948.40217391304	1901.63043478261	1991.36956521739	1884.72826086957	1910.13043478261	2128.38043478261	2032.9347826087	1924.61956521739	2150.23913043478	1864.32608695652	1866.10869565217	1916.94565217391	1848.21739130435	1930.66304347826	1870.54347826087	1802.89130434783	1961.70197826087	0.309344296585431
SESTD1	1119.36956521739	1548.57608695652	1586.02173913043	1291.13043478261	1453.29347826087	1535.40217391304	1515.47826086957	1281.95652173913	1353.39130434783	1405.30434782609	1340.92391304348	1283.17391304348	1296.69565217391	1496.59782608696	1503.26086956522	1418.86956521739	1516.89130434783	1572.36956521739	1636	1530.86956521739	1080.82608695652	1629.78260869565	1627.60869565217	1520.80434782609	1886.97826086957	1573.08695652174	1709.84782608696	1686.91304347826	1557.84782608696	1790.38043478261	1391.41304347826	1557.5652173913	1432.40217391304	1286.53260869565	1223.72826086957	1342.89130434783	1453.29347826087	1359.71739130435	1357.20652173913	1460.26086956522	1357.63043478261	1290.95652173913	1164.85869565217	1444.67391304348	1476.16304347826	1125.88043478261	1445.10491304348	0.611963499873645
FER	946.119565217391	994.065217391304	1114.16304347826	1423.28260869565	1297.76086956522	1127.04347826087	914.304347826087	1456.23913043478	893.456521739131	1117.92391304348	1084.08695652174	1365.52173913044	973.630434782609	917.021739130435	1076.45652173913	1279.75	967.673913043478	866.826086956522	1054.65217391304	1292.6847826087	863.891304347826	920.826086956522	1025.67391304348	1266.13043478261	1064.97826086957	1046.46739130435	1425.45652173913	844.521739130435	1016.02173913043	1249.5652173913	1109.45652173913	1007.47826086957	1046.13043478261	1386.26086956522	977.826086956522	869.826086956522	920.826086956522	1419.71739130435	1107.83695652174	977.510869565217	821	1395.60869565217	982.130434782609	904.782608695652	1111.73913043478	1336.32608695652	1092.62286956522	0.800453726178888
CIRBP	937.108695652174	1216.9347826087	1219	896.510869565218	1119.65217391304	1281.5652173913	1213	787.532608695652	1447.5652173913	1461.86956521739	1201.30434782609	916.619565217391	1036.94565217391	1454.27173913043	1245.10869565217	1175.92391304348	1449.0652173913	1520.13043478261	1102.65217391304	1142	1471.89130434783	1336.57608695652	1096.97826086957	985.543478260869	1476.16304347826	1324.9347826087	1245.10869565217	1528.40217391304	1275.84782608696	1341.58695652174	1156.04347826087	1243.82608695652	1218.52173913043	914.652173913043	960.847826086957	1461.86956521739	1382.0652173913	970.326086956522	1274.21739130435	1510.52173913043	1519.88043478261	867.565217391304	1318.39130434783	1454.52173913043	1436.63043478261	915.891304347826	1228.55573695652	0.520099541069625
NOB1	1045.80434782609	879.336956521739	791.152173913044	682.891304347826	866.826086956522	773.434782608696	855.913043478261	628.010869565217	806.891304347826	865.902173913044	850.521739130435	818.869565217391	932.369565217391	971.217391304348	865.902173913044	819.826086956522	702.413043478261	934.20652173913	793.79347826087	738.097826086957	885.5	760.978260869565	767.695652173913	788.5	763.336956521739	845.934782608696	650.173913043478	777.260869565217	804.152173913044	646.695652173913	888.217391304348	819.5	830.728260869565	699.021739130435	797.847826086957	1122.96739130435	778.902173913044	669.630434782609	885.173913043478	879.217391304348	792.521739130435	588.684782608696	938.260869565217	826.804347826087	695.217391304348	650.086956521739	808.182410869565	0.606744119727504
AHSA1	2256.84782608696	2010.38043478261	2090.47826086957	2126.82608695652	2085.6847826087	1937.45652173913	2367.54347826087	2232.89130434783	2058.5652173913	2019.65217391304	2132.0652173913	1906.07608695652	1898.26086956522	1899.47826086957	1846.19565217391	1627	1697.52173913043	1844.51086956522	1631.76086956522	1492.41304347826	2072.35869565217	1694.60869565217	1729.52173913043	1531.36956521739	1553.66304347826	1589.28260869565	1689.46739130435	1787.21739130435	1499.17391304348	1330.02173913043	1980.8152173913	1893.79347826087	2011.04347826087	1815.02173913043	1801.27173913044	2184.80434782609	1934.82608695652	1778.58695652174	1860.0652173913	1866.71739130435	2077.28260869565	1882.63043478261	2154.98913043478	1936.69565217391	1844.17391304348	1811.79347826087	1879.84354347826	0.526298985243483
DYNLT1	1882.63043478261	1806.96739130435	1720.91304347826	1708.21739130435	1414.97826086957	1722.89130434783	1721.65217391304	1601.17391304348	2178.5652173913	1807.9347826087	1802.52173913044	1565.23913043478	1885.97826086957	1567.97826086957	1602.41304347826	1528.19565217391	1793.55434782609	1760.60869565217	1333.36956521739	1516.13043478261	1836.08695652174	1597.08695652174	1847.10869565217	1617.02173913044	1686.01086956522	1716.55434782609	1454.27173913043	1877.09782608696	2049.08695652174	1997.32608695652	1759.15217391304	1676.76086956522	1580.91304347826	1962.34782608696	1637.27173913044	1977.23913043478	2053.65217391304	1840.26086956522	1796.25	1551.21739130435	1715.71739130435	1751.21739130435	1701.8152173913	1937.85869565217	1695.94565217391	1989.21739130435	1744.05217391304	0.445365640450738
PLCB3	886.760869565218	842.913043478261	984.521739130435	800.576086956522	840.5	821.239130434783	1100.10869565217	763.608695652174	902.347826086956	781.782608695652	694.489130434783	687.554347826087	971.336956521739	816.782608695652	768	675.967391304348	817.152173913044	887.467391304348	806.586956521739	654	889.413043478261	758.054347826087	663.869565217391	714.282608695652	722.260869565218	717.413043478261	658.619565217391	771.804347826087	773.913043478261	739.565217391304	988.630434782609	877.304347826087	965.065217391304	861.586956521739	1065.98913043478	925.04347826087	913.913043478261	797.847826086957	931.923913043478	915.695652173913	992.097826086957	784.565217391304	1097.55434782609	905.934782608696	886.760869565218	738.913043478261	838.298193478261	0.309344296585431
GUCD1	918.826086956522	943	907.391304347826	767.934782608696	909.076086956522	895.934782608696	1074.70652173913	737.467391304348	987.065217391304	1022.60869565217	946.586956521739	869.565217391304	965.065217391304	1051.82608695652	944.826086956522	870.673913043478	976.673913043478	1115.47826086957	903.673913043478	838.771739130435	1053	1018.69565217391	1009.0652173913	892.54347826087	1135.0652173913	1008.86956521739	929.152173913043	1128.88043478261	1023.66304347826	909	973.79347826087	1018.15217391304	1116.39130434783	804.79347826087	928.978260869565	1072.65217391304	929.152173913043	790.195652173913	894.717391304348	931.326086956522	969.869565217391	831.967391304348	957.108695652174	908.326086956522	954.010869565218	801.239130434783	948.646973913043	0.961997517770803
TP53BP2	964.086956521739	925.45652173913	935.326086956522	960.847826086957	1050.98913043478	895.934782608696	975.619565217391	968.021739130435	1671.39130434783	1116.98913043478	1011.10869565217	1112.4347826087	1612.75	1339.59782608696	1287.71739130435	1299.57608695652	1679.15217391304	1464.58695652174	1425.45652173913	1464.23913043478	1583.6847826087	1422.60869565217	1386.04347826087	1508.32608695652	1426.69565217391	1344.46739130435	1399.88043478261	1330.45652173913	1340.92391304348	1323.19565217391	1231.90217391304	1129.69565217391	1226.05434782609	1100.10869565217	1170.89130434783	1191.65217391304	1134.55434782609	1148.10869565217	1110.34782608696	1042.13043478261	1164.39130434783	1180.63043478261	1109.32608695652	1012.73913043478	927.5	1182.9347826087	1223.70720652174	0.826160591726835
CTBS	890.054347826087	994.065217391304	996.130434782609	1005.13043478261	928.978260869565	1162.97826086957	888.04347826087	1043.19565217391	733.217391304348	983.413043478261	861.010869565217	950.239130434783	724.771739130435	825.021739130435	769.565217391304	869.271739130435	880.663043478261	870.978260869565	721.695652173913	981.630434782609	855.673913043478	974.521739130435	981.739130434783	950.673913043478	1020.17391304348	798.065217391304	843.130434782609	855	886.891304347826	1091.91304347826	871.097826086957	1020.69565217391	1028.30434782609	1070.76086956522	816.413043478261	737.347826086957	987.510869565217	1048.47826086957	957.532608695652	849.239130434783	810.804347826087	983.739130434783	731.152173913044	1105.5652173913	1108.61956521739	1090.55434782609	925.12285	0.688956493998473
GATC	1931.29347826087	2263.45652173913	2020.63043478261	1992.95652173913	1836.76086956522	2045.39130434783	2000.36956521739	2011.04347826087	1750.71739130435	1784.97826086957	1752.07608695652	2015.76086956522	1783.97826086957	1938.61956521739	1996.97826086957	2101.96739130435	2015.04347826087	1677.21739130435	1879.66304347826	2155.83695652174	2044.33695652174	1966.67391304348	2022.82608695652	2052.48913043478	1910.13043478261	2108.32608695652	2083.45652173913	1985.76086956522	2063.20652173913	2041.53260869565	1936.69565217391	1899.10869565217	2080.88043478261	2153.67391304348	1969.13043478261	1769.88043478261	2027.08695652174	2122.5652173913	1988.10869565217	1951.0652173913	1973.5652173913	2055.80434782609	1953.46739130435	1997.6847826087	2076.90217391304	2109.21739130435	1984.74591304348	0.508274788764148
MTMR1	977.04347826087	924.336956521739	926.5	1092.23913043478	919.652173913044	889.29347826087	961.543478260869	1069.32608695652	1113.91304347826	1072.15217391304	1052.25	1091.73913043478	1071.01086956522	1142	1079.34782608696	996.934782608696	992.989130434783	1033.63043478261	1086.47826086957	983.576086956522	958.04347826087	911.565217391304	1072.65217391304	1029.23913043478	918.021739130435	918.021739130435	1121.84782608696	979.913043478261	995.728260869565	986.413043478261	962	984.956521739131	1051.82608695652	995.076086956522	1044.76086956522	1236.47826086957	1125.65217391304	993.923913043478	1072.65217391304	1075	1166.0652173913	1116.73913043478	1143.47826086957	1103.09782608696	1015.25	1112.4347826087	1034.06068695652	0.280674532404896
SUDS3	1855.39130434783	2071.84782608696	1994.11956521739	2012.21739130435	1995.73913043478	2047.89130434783	1921.36956521739	1895.60869565217	1770.0652173913	1927.73913043478	1858.48913043478	1863.60869565217	1612.04347826087	1751.55434782609	1597.36956521739	1836.08695652174	1661.61956521739	1732.80434782609	1561.34782608696	1740.19565217391	1616.78260869565	1570.47826086957	1728.02173913044	1655.71739130435	1624.95652173913	1489.41304347826	1755.77173913044	1589.04347826087	1579.70652173913	1591.52173913043	1752.9347826087	1742.60869565217	1713.28260869565	1851.41304347826	1673.95652173913	1951.80434782609	1803.5	1982.26086956522	1829.66304347826	1958.26086956522	1623.84782608696	1773.01086956522	1934.03260869565	1841.17391304348	1800.61956521739	1719.9347826087	1779.58326086957	0.540405196408529
PCMT1	1393.76086956522	1255.32608695652	1172.67391304348	1297.33695652174	1204.8152173913	1215.52173913044	1188.34782608696	1287.9347826087	1166.8152173913	1237.76086956522	1242.39130434783	1304.32608695652	1241.30434782609	1132.47826086957	1161.65217391304	1310.71739130435	1333.36956521739	1125.88043478261	1108.82608695652	1415.80434782609	1389.26086956522	1195.5652173913	1242.39130434783	1427.6847826087	1232.26086956522	1214.33695652174	1400.95652173913	1398.45652173913	1274.6847826087	1402.95652173913	1340.92391304348	1160.34782608696	1180.63043478261	1384.17391304348	1338.4347826087	1121.22826086957	1179.16304347826	1372.41304347826	1306.28260869565	1027.10869565217	1174.98913043478	1442.53260869565	1023.40217391304	1293.10869565217	1280.30434782609	1591.71739130435	1265.0512826087	0.759409487753836
WDR61	2012.53260869565	2137.71739130435	1973.5652173913	1929.15217391304	1972.58695652174	2133.82608695652	2025.17391304348	2002.58695652174	2177.11956521739	2149.16304347826	2239.91304347826	1886.66304347826	2099.25	2580.20652173913	2404.32608695652	1951.80434782609	1998.04347826087	2540.45652173913	2247.54347826087	1782.01086956522	2106.9347826087	2147.48913043478	2037.36956521739	1840.26086956522	2073.39130434783	1915.54347826087	1829.66304347826	2256.47826086957	2104.69565217391	1995.73913043478	2089.98913043478	2088.5	1937.85869565217	2078	2037.71739130435	2480.97826086957	2244.5	1879.13043478261	2290.58695652174	2655	2394.26086956522	1959.60869565217	2639.23913043478	2383.86956521739	2120.5652173913	1992.57608695652	2126.59969565217	0.289351888894287
NDUFB2	1545.71739130435	1378.41304347826	1409.61956521739	1051.52173913043	1512.67391304348	1428.21739130435	1356.70652173913	1041.97826086957	1456.65217391304	1458.71739130435	1265.6847826087	1071.29347826087	1236.72826086957	1217.97826086957	999.260869565217	961.804347826087	1204.30434782609	1322.33695652174	937.271739130435	1121.65217391304	1518.02173913043	1308.20652173913	1210.38043478261	1061.75	1260.26086956522	1366.89130434783	1134.55434782609	1480.9347826087	1287.0652173913	1265.91304347826	1320.52173913043	1248.04347826087	1302.05434782609	1158.36956521739	1308.58695652174	1448.73913043478	1370.82608695652	1042.95652173913	1360.95652173913	1071.82608695652	1135.58695652174	1073.76086956522	1222.65217391304	1456.4347826087	1410.41304347826	1243.28260869565	1261.90262826087	0.960187435279159
[truncated: 246 more rows]
