# Supplementary material for: Role of Non-Coding Regulatory Elements in the Control of GR-Dependent Gene Expression
Source: Int J Mol Sci. 2021 Apr 20;22(8):4258. doi: 10.3390/ijms22084258 (PMC8073421; doi:10.3390/ijms22084258)
Supplement: Supplementary file 1 [file ijms-22-04258-s001.zip › Table_S7.tsv]

group1	group2	p.value
expression	EP300	0.30250711994383
NR3C1	EP300	1.0680683236158e-71
H3K27ac	expression	1.48340685880751e-14
H3K4me1	expression	2.24654226697792e-32
NR3C1	expression	1.7970567099755e-59
NR3C1	H3K27ac	3.38345996296046e-19
NR3C1	H3K4me1	1.33790647768137e-05
