# Supplementary material for: Role of Non-Coding Regulatory Elements in the Control of GR-Dependent Gene Expression
Source: Int J Mol Sci. 2021 Apr 20;22(8):4258. doi: 10.3390/ijms22084258 (PMC8073421; doi:10.3390/ijms22084258)
Supplement: Supplementary file 1 [file ijms-22-04258-s001.zip › Table_S8.txt]

Error: gene.name
                 Df Sum Sq Mean Sq F value  Pr(>F)   
type.data         4  34742    8686   3.914 0.00412 **
gene.regulation   1    377     377   0.170 0.68067   
Residuals       291 645774    2219                   
---
Signif. codes:  0 ‘***’ 0.001 ‘**’ 0.01 ‘*’ 0.05 ‘.’ 0.1 ‘ ’ 1

Error: Within
                            Df Sum Sq Mean Sq F value Pr(>F)    
type.data                    4 625511  156378  209.47 <2e-16 ***
gene.regulation              1     15      15    0.02  0.888    
type.data:gene.regulation    4  79142   19785   26.50 <2e-16 ***
Residuals                 1264 943647     747                   
---
Signif. codes:  0 ‘***’ 0.001 ‘**’ 0.01 ‘*’ 0.05 ‘.’ 0.1 ‘ ’ 1
