# Supplementary material for: Role of Non-Coding Regulatory Elements in the Control of GR-Dependent Gene Expression
Source: Int J Mol Sci. 2021 Apr 20;22(8):4258. doi: 10.3390/ijms22084258 (PMC8073421; doi:10.3390/ijms22084258)
Supplement: Supplementary file 1 [file ijms-22-04258-s001.zip › Table_S9.tsv]

group	group1	group2	p.value
EP300	up-regulated	up-delta_ep300	0.010272949309738
expression	up-regulated	up-delta_ep300	3.85268803357357e-07
H3K27ac	up-regulated	up-delta_ep300	0.737663531183052
H3K4me1	up-regulated	up-delta_ep300	0.621009205467295
NR3C1	up-regulated	up-delta_ep300	0.000218754947178948
